# Supplementary material for: Global Transcriptome Analysis Revealed the Molecular Regulation Mechanism of Pigment and Reactive Oxygen Species Metabolism During the Stigma Development of Carya cathayensis
Source: Front Plant Sci. 2022 May 9;13:881394. doi: 10.3389/fpls.2022.881394 (PMC9125253; doi:10.3389/fpls.2022.881394)
Supplement: Supplementary file 2 [file Table_1.XLSX]

## Sheet: Sheet1
Supplementary Table 1 Primers used in this study
Gene names	Gene ID	Farward Primer	Reverse Primer
UBC9-5	CCA0559S0100	GGCCCTGTTGCTGAAGAC	GGCCCTGTTGCTGAAGAC
PAL	CCA0546S0150	GTCGAGAATGGAAAAGCGGC	GACAATCCAGCATCGGGTCA
C4H	CCA0524S0150	GAGGAGTCCAAGGTTGAGGC	ATTGCCCACCCTTCTCTGTG
4CL1/5	CCA1526S0019	TCATTCCCAAGTCACCATCGG	GGTGATAGCAAAGTTGAGCAGC
4CL3	CCA1113S0014	TGTTGACAGGGTGAAGGAGC	TGATCGGACCACGAATGCAA
CHS	CCA1379S0019	GCGCTGCTGCTCTTATTGTC	AATCCGGGCACATCCTTCAG
CHI	CCA1015S0108	AAATTCCCACCTGGCTCCTC	CGGAGAAACACCATGCTTGC
F3'5'H	CCA0795S0041	GAAGGAGGATCTGTGCTGGG	CCATAGCTGCAAGGGGAACA
F3H	CCA0705S0076	AGCCACATTCCAGAACCCAG	CCTCCTTGGCCAGCTTCTTT
F3'H	CCA0507S0050	CGCTAGAGTTTAGGCCCGAG	GCATGGACTAGGGTTGCTGT
FLS5	CCA0006S0007	TCACCATTCTCGTGCCGAAT	TCGTCTTCCCTTTGTCCACG
DFR（TT3))	CCA1620S0012	CGGAGACCCACATGACTCTG	CAGCCCTTCTATCGTTGGCT
ANS	CCA0533S0160	GTACGGGAGGCAACTGAGAG	GCCAAGAGCTAGTTCGGGTT
UGT88A1	CCA0708S0130	TCGGAGAACGGGTTTGTGAG	TGGCGTTCTTCCACGAATCA
TT19	CCA0924S0001	GCAAAAGCTGGAGAAGGTGC	GCTTGAGATGTCCTCCCACC
MRP1/2	CCA1731S0009	GTCTTGCTCGGGCATTGTTG	CCTGACCAGCATCAAGCAGA
TT12	CCA1653S0005	GCCAGAACAAATTGGGATGCT	GCCTGTCACAGCCCCAAA
AHA10	CCA0500S0229	GGCGTGCTGAAATAGCCAGG	CATGTGAGCAACGGCTACCA
TT2	CCA1382S0024	GCAGGGGGACATTAGCTTGT	GCACTGGATATTGGGAGCCA
PAP1	CCA0887S0030	CAACGTTGACGCCGTTAGAG	AAAGCTGTTTCGTCCTCCGT
TT8	CCA1400S0020	TTGAGACCACGACGGTTCAG	CAGTCTGTGTGGGGGATGAC
TTG1	CCA0903S0008	ACTGGAACGACATCGAACCC	GAGACGGAGGCGAAAATCCT
HEMA1/2/3	CCA0953S0097	CGTCCGAAGCCCCATTACTT	ATTGGCAGCAACAACCTCCT
HEMB1/2	CCA1025S0035	CATGAAGGCGAGGAGGACAC	GCTCGAGGCACTAACCCATT
HEMC	CCA0737S0024	ACCTTGGATGGATCTTGCCG	AGCTCCTTGCCAGCATCTTT
HEMD	CCA0986S0008	GGGTCAGTCTTTCTGGAGGC	ACCTGTCGCTTTTGAGGGTG
HEME2	CCA0676S0015	TGCTCATTTCTTCGAGGTAGC	AGCTTTTCATATCCCTCTCGGT
HEMG2	CCA0779S0258	CCTTAGGCAGTTGCTGGGAG	TGTGGTTCCCTGCGTAGAAG
HEMF	CCA0559S0148	AGACAGTGGTGGTTTGGTGG	CTCTCACCACGGTGCTTGAT
CRD1	CCA0694S0099	GGGCTCGATTCTTCTGCCTT	TCCAACACGGCTGGGAAAAT
CHLM	CCA0866S0032	TGTTGAGGCTGTTCCTGCAT	ATTGACAACTGCTATTTGCTGC
DVR	CCA0975S0060	TGTGAGGCCAACTGCATTCT	GGGCAGCACCTGGTTAATCT
PORA/B	CCA0576S0111	GTTCAGGCTCCTCTTCCCAC	GCCTTATCTGCATTGCTGGC
CAO	CCA0803S0014	TCAAAGCCAGGGAAACTGGG	TGCGAAATGCCTCCACAGAT
CHLG	CCA0700S0013	ATAGCCGGGTTGGGTATTGC	GTTTACCGACCCCAAGCAGA
NOL	CCA1573S0024	GGGGCTGGTTCAGATGGAAG	GTTGTGACCATTCCAGGCGA
PAO	CCA0082S0003	CCACGGATCAGTGCTGAGTT	CCCTGGCATCGTAAACTGGA
NYE1/2	CCA0782S0001	CAACAAAGTGGAATGCTGGGG	CGCGATCAAGCTCATTGGTG
DXR	CCA0259S0002	GCTTGCCCATCCTCTACACA	GCAGCACTAAGAACCCCAGT
DXS1/2	CCA0975S0037	GTTCAGAGCTGTTTGGCTGC	AAGGGCCATGAACTGAGCAA
CMK	CCA0082S0016	ACAAGCGCCTTCAGTTGGAT	AGCTGCACATACACGCTGTT
MDS	CCA0623S0085	CGATTTTGGGTGCTTTGGGG	CTTGATTGCCTCCTTGTGCG
HDS	CCA1187S0024	AGACGGAGTACGTGTCATGC	AGGTCAATCTTTCCGGGAGC
HDR	CCA0659S0070	GCTCAATCATGGCGAGTTGG	ACACCAGTTGCAAGGCTTCT
IPI	CCA0990S0043	ACCTTCTGATGGCAAGTGGG	CGACTAGCCTGAACCAAGGG
GGPPS	CCA0854S0004	TCGCAGGAATTGGGGAAGAC	CCAAAGCAATCAATGGCGCT
PSY	CCA0887S0096	TCAGGCAGGGCTTTCAGATG	TAACAAGGACGCCCATACCG
PDS3	CCA0831S0026	AGCATGGTTCCAAGATGGCT	CCCCTTCAATCACGTTCCCA
ZISO	CCA1601S0008	ATGAGAATCACGAGGCACCC	CGAAAGCCTCACCATACCGT
ZDS	CCA0733S0081	ATCACAGACAAAGGGGGCAG	AGGGACATCACATGCTGCAA
LCYE	CCA1033S0054	CAGAAGAACCTTGCGTTTGGT	CCTTGGAATGGCTCTGCTTC
LCYB	CCA1188S0007	GCCATTGCTCAGCTCACTTC	GCTGCTGCATGTCCTTTCTTAC
LUT1	CCA1151S0050	TGTGTCTGAGGTCTCCGAGT	GCATCGGGCTTGAGCTTTTC
LUT5	CCA1252S0001	CAATGCTTGTCCGCCGATTT	GCATCTCCAATGCGGGTACT
ZEP	CCA0774S0022	TACCCGTTTCCGTCCATCAG	TGCCGCTCCCAATAAATGCT
ATVDE	CCA1680S0009	GGGGAGGTTGAGAAGGTTGG	TGTCTCCATCTTCAGCTCGC
NCED2/5	CCA1016S0002	ATTAGAGGTGGCTCTCCCGT	CACCACCTCATCTGACTCCG
CCD1	CCA1550S0033	TCACTTGCCGCCTTGAGAAT	CTGTCTCCTGCCAGTGTAGC
