# Supplementary material for: Global Transcriptome Analysis Revealed the Molecular Regulation Mechanism of Pigment and Reactive Oxygen Species Metabolism During the Stigma Development of Carya cathayensis
Source: Front Plant Sci. 2022 May 9;13:881394. doi: 10.3389/fpls.2022.881394 (PMC9125253; doi:10.3389/fpls.2022.881394)
Supplement: Supplementary file 3 [file Table_2.XLSX]

## Sheet: Sheet1
Supplementary table 2 Summary of the RNA-Seq Outcomes
Sample	Total Raw Reads (M)	Total Clean Reads (M)	Total Clean Bases(Gb)	Clean Reads Q20(%)	Clean Reads Q30(%)	Clean Reads Ratio(%)	Total Mapping to genome(%)	Uniquely Mapping to genome(%)	Total Mapping to gene(%)	Uniquely Mapping to gene(%)	Total genes
S1_1	45.57	42.28	6.34	96.35	91.16	92.78	93.86	58.34	71.14	54.87	31027
S1_2	45.57	42.17	6.33	96.19	90.86	92.54	93.64	56.9	70.74	54.73
S1_3	45.21	41.85	6.28	96.51	91.55	92.57	93.86	59.12	70.91	54.54
S2_1	45.57	41.97	6.3	96.42	91.4	92.09	93.74	58.51	71.03	54.64
S2_2	45.57	42.31	6.35	96.17	90.78	92.84	93.43	56.84	67.99	53.05
S2_3	45.57	42.36	6.35	96.18	90.78	92.94	93.68	57.09	71.17	54.77
S3_1	45.57	42.71	6.41	96.76	91.88	93.71	94.53	62.31	69.48	53.45
S3_2	45.57	42.51	6.38	96.6	91.44	93.27	94.27	61.29	68.47	52.85
S3_3	41.98	39.08	5.86	96.56	91.47	93.1	94.34	60.25	69.47	53.35
S4_1	45.57	42.34	6.35	96.74	91.86	92.9	94.34	61.79	70.43	54.07
S4_2	45.57	42.5	6.37	96.66	91.65	93.24	94.3	61.41	68.89	53.59
S4_3	45.57	42.68	6.4	96.64	91.6	93.65	94.13	61.32	67.88	52.83
