# Supplementary material for: Global Transcriptome Analysis Revealed the Molecular Regulation Mechanism of Pigment and Reactive Oxygen Species Metabolism During the Stigma Development of Carya cathayensis
Source: Front Plant Sci. 2022 May 9;13:881394. doi: 10.3389/fpls.2022.881394 (PMC9125253; doi:10.3389/fpls.2022.881394)
Supplement: Supplementary file 4 [file Table_3.XLSX]

## Sheet: Sheet1
Supplementary Table 3 All gene of the 12 clusters
cluster_1	cluster_2	cluster_3	cluster_4	cluster_5	cluster_6	cluster_7	cluster_8	cluster_9	cluster_10	cluster_11	cluster_12
BGI_novel_G000024	BGI_novel_G000001	BGI_novel_G000010	BGI_novel_G000020	BGI_novel_G000009	BGI_novel_G000004	BGI_novel_G000006	BGI_novel_G000002	BGI_novel_G000015	BGI_novel_G000016	BGI_novel_G000005	BGI_novel_G000003
BGI_novel_G000030	BGI_novel_G000007	BGI_novel_G000025	BGI_novel_G000022	BGI_novel_G000026	BGI_novel_G000018	BGI_novel_G000008	BGI_novel_G000019	BGI_novel_G000023	BGI_novel_G000036	BGI_novel_G000013	BGI_novel_G000011
BGI_novel_G000056	BGI_novel_G000021	BGI_novel_G000029	BGI_novel_G000031	BGI_novel_G000041	BGI_novel_G000053	BGI_novel_G000034	BGI_novel_G000032	BGI_novel_G000027	BGI_novel_G000043	BGI_novel_G000038	BGI_novel_G000012
BGI_novel_G000066	BGI_novel_G000063	BGI_novel_G000072	BGI_novel_G000039	BGI_novel_G000057	BGI_novel_G000070	BGI_novel_G000052	BGI_novel_G000050	BGI_novel_G000028	BGI_novel_G000046	BGI_novel_G000091	BGI_novel_G000014
BGI_novel_G000096	BGI_novel_G000064	BGI_novel_G000075	BGI_novel_G000040	BGI_novel_G000065	BGI_novel_G000071	BGI_novel_G000059	BGI_novel_G000054	BGI_novel_G000035	BGI_novel_G000047	BGI_novel_G000093	BGI_novel_G000017
BGI_novel_G000098	BGI_novel_G000077	BGI_novel_G000090	BGI_novel_G000042	BGI_novel_G000067	BGI_novel_G000079	BGI_novel_G000084	BGI_novel_G000117	BGI_novel_G000044	BGI_novel_G000048	BGI_novel_G000101	BGI_novel_G000033
BGI_novel_G000129	BGI_novel_G000097	BGI_novel_G000124	BGI_novel_G000055	BGI_novel_G000069	BGI_novel_G000082	BGI_novel_G000094	BGI_novel_G000188	BGI_novel_G000045	BGI_novel_G000049	BGI_novel_G000119	BGI_novel_G000089
BGI_novel_G000133	BGI_novel_G000111	BGI_novel_G000162	BGI_novel_G000060	BGI_novel_G000120	BGI_novel_G000083	BGI_novel_G000102	BGI_novel_G000189	BGI_novel_G000051	BGI_novel_G000081	BGI_novel_G000121	BGI_novel_G000099
BGI_novel_G000174	BGI_novel_G000112	BGI_novel_G000166	BGI_novel_G000074	BGI_novel_G000123	BGI_novel_G000092	BGI_novel_G000107	BGI_novel_G000201	BGI_novel_G000058	BGI_novel_G000105	BGI_novel_G000179	BGI_novel_G000104
BGI_novel_G000180	BGI_novel_G000125	BGI_novel_G000169	BGI_novel_G000078	BGI_novel_G000134	BGI_novel_G000103	BGI_novel_G000113	BGI_novel_G000222	BGI_novel_G000061	BGI_novel_G000106	BGI_novel_G000207	BGI_novel_G000116
BGI_novel_G000196	BGI_novel_G000149	BGI_novel_G000178	BGI_novel_G000087	BGI_novel_G000161	BGI_novel_G000126	BGI_novel_G000142	BGI_novel_G000234	BGI_novel_G000147	BGI_novel_G000110	BGI_novel_G000215	BGI_novel_G000130
BGI_novel_G000214	BGI_novel_G000160	BGI_novel_G000220	BGI_novel_G000088	BGI_novel_G000163	BGI_novel_G000127	BGI_novel_G000143	BGI_novel_G000292	BGI_novel_G000148	BGI_novel_G000114	BGI_novel_G000258	BGI_novel_G000131
BGI_novel_G000247	BGI_novel_G000165	BGI_novel_G000221	BGI_novel_G000095	BGI_novel_G000228	BGI_novel_G000128	BGI_novel_G000145	BGI_novel_G000293	BGI_novel_G000150	BGI_novel_G000118	BGI_novel_G000268	BGI_novel_G000154
BGI_novel_G000249	BGI_novel_G000187	BGI_novel_G000227	BGI_novel_G000100	BGI_novel_G000232	BGI_novel_G000132	BGI_novel_G000152	BGI_novel_G000336	BGI_novel_G000177	BGI_novel_G000135	BGI_novel_G000289	BGI_novel_G000170
BGI_novel_G000253	BGI_novel_G000193	BGI_novel_G000233	BGI_novel_G000108	BGI_novel_G000240	BGI_novel_G000139	BGI_novel_G000172	BGI_novel_G000345	BGI_novel_G000216	BGI_novel_G000136	BGI_novel_G000296	BGI_novel_G000181
BGI_novel_G000255	BGI_novel_G000194	BGI_novel_G000254	BGI_novel_G000109	BGI_novel_G000263	BGI_novel_G000146	BGI_novel_G000175	BGI_novel_G000361	BGI_novel_G000217	BGI_novel_G000137	BGI_novel_G000306	BGI_novel_G000184
BGI_novel_G000262	BGI_novel_G000197	BGI_novel_G000277	BGI_novel_G000115	BGI_novel_G000266	BGI_novel_G000151	BGI_novel_G000210	BGI_novel_G000362	BGI_novel_G000218	BGI_novel_G000138	BGI_novel_G000317	BGI_novel_G000191
BGI_novel_G000272	BGI_novel_G000198	BGI_novel_G000302	BGI_novel_G000122	BGI_novel_G000286	BGI_novel_G000176	BGI_novel_G000212	BGI_novel_G000398	BGI_novel_G000219	BGI_novel_G000141	BGI_novel_G000320	BGI_novel_G000203
BGI_novel_G000279	BGI_novel_G000199	BGI_novel_G000304	BGI_novel_G000167	BGI_novel_G000290	BGI_novel_G000195	BGI_novel_G000225	BGI_novel_G000407	BGI_novel_G000229	BGI_novel_G000144	BGI_novel_G000326	BGI_novel_G000239
BGI_novel_G000281	BGI_novel_G000200	BGI_novel_G000316	BGI_novel_G000173	BGI_novel_G000291	BGI_novel_G000206	BGI_novel_G000250	BGI_novel_G000417	BGI_novel_G000235	BGI_novel_G000153	BGI_novel_G000328	BGI_novel_G000248
BGI_novel_G000282	BGI_novel_G000211	BGI_novel_G000319	BGI_novel_G000186	BGI_novel_G000295	BGI_novel_G000226	BGI_novel_G000275	BGI_novel_G000463	BGI_novel_G000257	BGI_novel_G000155	BGI_novel_G000348	BGI_novel_G000278
BGI_novel_G000299	BGI_novel_G000224	BGI_novel_G000324	BGI_novel_G000190	BGI_novel_G000303	BGI_novel_G000260	BGI_novel_G000283	BGI_novel_G000484	BGI_novel_G000259	BGI_novel_G000156	BGI_novel_G000359	BGI_novel_G000313
BGI_novel_G000300	BGI_novel_G000237	BGI_novel_G000338	BGI_novel_G000236	BGI_novel_G000314	BGI_novel_G000270	BGI_novel_G000309	BGI_novel_G000485	BGI_novel_G000269	BGI_novel_G000157	BGI_novel_G000374	BGI_novel_G000318
BGI_novel_G000301	BGI_novel_G000238	BGI_novel_G000340	BGI_novel_G000241	BGI_novel_G000325	BGI_novel_G000271	BGI_novel_G000311	BGI_novel_G000488	BGI_novel_G000354	BGI_novel_G000158	BGI_novel_G000383	BGI_novel_G000334
BGI_novel_G000310	BGI_novel_G000251	BGI_novel_G000346	BGI_novel_G000245	BGI_novel_G000353	BGI_novel_G000284	BGI_novel_G000312	BGI_novel_G000510	BGI_novel_G000368	BGI_novel_G000159	BGI_novel_G000396	BGI_novel_G000356
BGI_novel_G000329	BGI_novel_G000252	BGI_novel_G000364	BGI_novel_G000256	BGI_novel_G000381	BGI_novel_G000285	BGI_novel_G000327	BGI_novel_G000582	BGI_novel_G000378	BGI_novel_G000164	BGI_novel_G000397	BGI_novel_G000360
BGI_novel_G000331	BGI_novel_G000339	BGI_novel_G000399	BGI_novel_G000264	BGI_novel_G000382	BGI_novel_G000333	BGI_novel_G000350	BGI_novel_G000603	BGI_novel_G000386	BGI_novel_G000168	BGI_novel_G000401	BGI_novel_G000370
BGI_novel_G000335	BGI_novel_G000363	BGI_novel_G000450	BGI_novel_G000287	BGI_novel_G000390	BGI_novel_G000352	BGI_novel_G000355	BGI_novel_G000617	BGI_novel_G000388	BGI_novel_G000171	BGI_novel_G000405	BGI_novel_G000392
BGI_novel_G000337	BGI_novel_G000365	BGI_novel_G000459	BGI_novel_G000294	BGI_novel_G000413	BGI_novel_G000357	BGI_novel_G000358	BGI_novel_G000618	BGI_novel_G000389	BGI_novel_G000182	BGI_novel_G000443	BGI_novel_G000406
BGI_novel_G000349	BGI_novel_G000367	BGI_novel_G000473	BGI_novel_G000315	BGI_novel_G000419	BGI_novel_G000371	BGI_novel_G000369	BGI_novel_G000619	BGI_novel_G000420	BGI_novel_G000183	BGI_novel_G000501	BGI_novel_G000411
BGI_novel_G000351	BGI_novel_G000373	BGI_novel_G000493	BGI_novel_G000321	BGI_novel_G000422	BGI_novel_G000380	BGI_novel_G000372	BGI_novel_G000622	BGI_novel_G000423	BGI_novel_G000185	BGI_novel_G000502	BGI_novel_G000415
BGI_novel_G000375	BGI_novel_G000376	BGI_novel_G000509	BGI_novel_G000322	BGI_novel_G000433	BGI_novel_G000409	BGI_novel_G000384	BGI_novel_G000624	BGI_novel_G000424	BGI_novel_G000202	BGI_novel_G000503	BGI_novel_G000444
BGI_novel_G000439	BGI_novel_G000393	BGI_novel_G000522	BGI_novel_G000366	BGI_novel_G000449	BGI_novel_G000412	BGI_novel_G000385	BGI_novel_G000635	BGI_novel_G000426	BGI_novel_G000204	BGI_novel_G000515	BGI_novel_G000453
BGI_novel_G000446	BGI_novel_G000404	BGI_novel_G000565	BGI_novel_G000377	BGI_novel_G000452	BGI_novel_G000478	BGI_novel_G000400	BGI_novel_G000659	BGI_novel_G000427	BGI_novel_G000205	BGI_novel_G000519	BGI_novel_G000465
BGI_novel_G000447	BGI_novel_G000421	BGI_novel_G000589	BGI_novel_G000394	BGI_novel_G000460	BGI_novel_G000481	BGI_novel_G000437	BGI_novel_G000674	BGI_novel_G000429	BGI_novel_G000213	BGI_novel_G000535	BGI_novel_G000474
BGI_novel_G000464	BGI_novel_G000425	BGI_novel_G000591	BGI_novel_G000395	BGI_novel_G000483	BGI_novel_G000489	BGI_novel_G000440	BGI_novel_G000679	BGI_novel_G000454	BGI_novel_G000223	BGI_novel_G000536	BGI_novel_G000480
BGI_novel_G000486	BGI_novel_G000469	BGI_novel_G000605	BGI_novel_G000408	BGI_novel_G000495	BGI_novel_G000497	BGI_novel_G000441	BGI_novel_G000683	BGI_novel_G000472	BGI_novel_G000230	BGI_novel_G000541	BGI_novel_G000492
BGI_novel_G000504	BGI_novel_G000514	BGI_novel_G000621	BGI_novel_G000410	BGI_novel_G000512	BGI_novel_G000498	BGI_novel_G000442	BGI_novel_G000699	BGI_novel_G000479	BGI_novel_G000231	BGI_novel_G000559	BGI_novel_G000494
BGI_novel_G000518	BGI_novel_G000523	BGI_novel_G000628	BGI_novel_G000416	BGI_novel_G000513	BGI_novel_G000505	BGI_novel_G000451	BGI_novel_G000711	BGI_novel_G000507	BGI_novel_G000242	BGI_novel_G000560	BGI_novel_G000496
BGI_novel_G000521	BGI_novel_G000553	BGI_novel_G000631	BGI_novel_G000428	BGI_novel_G000525	BGI_novel_G000545	BGI_novel_G000458	BGI_novel_G000745	BGI_novel_G000508	BGI_novel_G000243	BGI_novel_G000561	BGI_novel_G000506
BGI_novel_G000542	BGI_novel_G000555	BGI_novel_G000639	BGI_novel_G000434	BGI_novel_G000528	BGI_novel_G000547	BGI_novel_G000462	BGI_novel_G000751	BGI_novel_G000511	BGI_novel_G000244	BGI_novel_G000564	BGI_novel_G000573
BGI_novel_G000544	BGI_novel_G000572	BGI_novel_G000645	BGI_novel_G000445	BGI_novel_G000529	BGI_novel_G000548	BGI_novel_G000482	BGI_novel_G000753	BGI_novel_G000516	BGI_novel_G000246	BGI_novel_G000566	BGI_novel_G000576
BGI_novel_G000569	BGI_novel_G000581	BGI_novel_G000661	BGI_novel_G000448	BGI_novel_G000530	BGI_novel_G000552	BGI_novel_G000490	BGI_novel_G000768	BGI_novel_G000517	BGI_novel_G000261	BGI_novel_G000567	BGI_novel_G000588
BGI_novel_G000570	BGI_novel_G000595	BGI_novel_G000663	BGI_novel_G000461	BGI_novel_G000532	BGI_novel_G000554	BGI_novel_G000499	BGI_novel_G000779	BGI_novel_G000549	BGI_novel_G000265	BGI_novel_G000568	BGI_novel_G000590
BGI_novel_G000578	BGI_novel_G000607	BGI_novel_G000677	BGI_novel_G000468	BGI_novel_G000533	BGI_novel_G000600	BGI_novel_G000520	BGI_novel_G000790	BGI_novel_G000550	BGI_novel_G000273	BGI_novel_G000585	BGI_novel_G000598
BGI_novel_G000640	BGI_novel_G000647	BGI_novel_G000678	BGI_novel_G000470	BGI_novel_G000534	BGI_novel_G000611	BGI_novel_G000563	BGI_novel_G000791	BGI_novel_G000557	BGI_novel_G000274	BGI_novel_G000586	BGI_novel_G000610
BGI_novel_G000644	BGI_novel_G000651	BGI_novel_G000691	BGI_novel_G000471	BGI_novel_G000537	BGI_novel_G000625	BGI_novel_G000609	BGI_novel_G000799	BGI_novel_G000580	BGI_novel_G000276	BGI_novel_G000597	BGI_novel_G000613
BGI_novel_G000664	BGI_novel_G000668	BGI_novel_G000701	BGI_novel_G000475	BGI_novel_G000538	BGI_novel_G000638	BGI_novel_G000709	BGI_novel_G000801	BGI_novel_G000592	BGI_novel_G000288	BGI_novel_G000599	BGI_novel_G000616
BGI_novel_G000670	BGI_novel_G000688	BGI_novel_G000705	BGI_novel_G000477	BGI_novel_G000539	BGI_novel_G000642	BGI_novel_G000716	BGI_novel_G000807	BGI_novel_G000602	BGI_novel_G000297	BGI_novel_G000627	BGI_novel_G000630
BGI_novel_G000675	BGI_novel_G000697	BGI_novel_G000707	BGI_novel_G000491	BGI_novel_G000540	BGI_novel_G000650	BGI_novel_G000729	BGI_novel_G000809	BGI_novel_G000637	BGI_novel_G000305	BGI_novel_G000652	BGI_novel_G000634
BGI_novel_G000692	BGI_novel_G000712	BGI_novel_G000741	BGI_novel_G000543	BGI_novel_G000546	BGI_novel_G000660	BGI_novel_G000798	BGI_novel_G000810	BGI_novel_G000656	BGI_novel_G000307	BGI_novel_G000662	BGI_novel_G000646
BGI_novel_G000740	BGI_novel_G000713	BGI_novel_G000743	BGI_novel_G000562	BGI_novel_G000551	BGI_novel_G000665	BGI_novel_G000829	BGI_novel_G000811	BGI_novel_G000686	BGI_novel_G000308	BGI_novel_G000672	BGI_novel_G000648
BGI_novel_G000746	BGI_novel_G000715	BGI_novel_G000770	BGI_novel_G000574	BGI_novel_G000594	BGI_novel_G000690	BGI_novel_G000848	BGI_novel_G000813	BGI_novel_G000689	BGI_novel_G000323	BGI_novel_G000682	BGI_novel_G000657
BGI_novel_G000762	BGI_novel_G000720	BGI_novel_G000785	BGI_novel_G000587	BGI_novel_G000614	BGI_novel_G000718	BGI_novel_G000884	BGI_novel_G000830	BGI_novel_G000693	BGI_novel_G000341	BGI_novel_G000708	BGI_novel_G000666
BGI_novel_G000763	BGI_novel_G000735	BGI_novel_G000787	BGI_novel_G000601	BGI_novel_G000615	BGI_novel_G000719	BGI_novel_G000885	BGI_novel_G000831	BGI_novel_G000696	BGI_novel_G000342	BGI_novel_G000722	BGI_novel_G000680
BGI_novel_G000783	BGI_novel_G000744	BGI_novel_G000792	BGI_novel_G000612	BGI_novel_G000620	BGI_novel_G000732	BGI_novel_G000893	BGI_novel_G000852	BGI_novel_G000700	BGI_novel_G000343	BGI_novel_G000761	BGI_novel_G000703
BGI_novel_G000833	BGI_novel_G000749	BGI_novel_G000817	BGI_novel_G000629	BGI_novel_G000623	BGI_novel_G000757	BGI_novel_G000898	BGI_novel_G000879	BGI_novel_G000721	BGI_novel_G000344	BGI_novel_G000769	BGI_novel_G000717
BGI_novel_G000839	BGI_novel_G000750	BGI_novel_G000818	BGI_novel_G000641	BGI_novel_G000626	BGI_novel_G000764	BGI_novel_G000932	BGI_novel_G000923	BGI_novel_G000727	BGI_novel_G000347	BGI_novel_G000793	BGI_novel_G000726
BGI_novel_G000861	BGI_novel_G000755	BGI_novel_G000819	BGI_novel_G000643	BGI_novel_G000632	BGI_novel_G000775	BGI_novel_G000948	BGI_novel_G000957	BGI_novel_G000730	BGI_novel_G000379	BGI_novel_G000804	BGI_novel_G000734
BGI_novel_G000871	BGI_novel_G000774	BGI_novel_G000841	BGI_novel_G000649	BGI_novel_G000633	BGI_novel_G000776	BGI_novel_G001031	BGI_novel_G000989	BGI_novel_G000736	BGI_novel_G000391	BGI_novel_G000849	BGI_novel_G000739
BGI_novel_G000874	BGI_novel_G000784	BGI_novel_G000868	BGI_novel_G000655	BGI_novel_G000658	BGI_novel_G000778	BGI_novel_G001035	BGI_novel_G000991	BGI_novel_G000742	BGI_novel_G000403	BGI_novel_G000887	BGI_novel_G000756
BGI_novel_G000880	BGI_novel_G000803	BGI_novel_G000872	BGI_novel_G000669	BGI_novel_G000667	BGI_novel_G000800	BGI_novel_G001086	BGI_novel_G000993	BGI_novel_G000748	BGI_novel_G000414	BGI_novel_G000889	BGI_novel_G000767
BGI_novel_G000881	BGI_novel_G000822	BGI_novel_G000897	BGI_novel_G000671	BGI_novel_G000698	BGI_novel_G000814	BGI_novel_G001109	BGI_novel_G001017	BGI_novel_G000759	BGI_novel_G000418	BGI_novel_G000890	BGI_novel_G000781
BGI_novel_G000882	BGI_novel_G000828	BGI_novel_G000901	BGI_novel_G000684	BGI_novel_G000710	BGI_novel_G000815	BGI_novel_G001110	BGI_novel_G001024	BGI_novel_G000765	BGI_novel_G000430	BGI_novel_G000894	BGI_novel_G000794
BGI_novel_G000883	BGI_novel_G000843	BGI_novel_G000902	BGI_novel_G000687	BGI_novel_G000758	BGI_novel_G000820	BGI_novel_G001119	BGI_novel_G001027	BGI_novel_G000777	BGI_novel_G000431	BGI_novel_G000895	BGI_novel_G000821
BGI_novel_G000888	BGI_novel_G000856	BGI_novel_G000914	BGI_novel_G000702	BGI_novel_G000786	BGI_novel_G000823	BGI_novel_G001123	BGI_novel_G001047	BGI_novel_G000802	BGI_novel_G000432	BGI_novel_G000900	BGI_novel_G000840
BGI_novel_G000903	BGI_novel_G000857	BGI_novel_G000922	BGI_novel_G000738	BGI_novel_G000795	BGI_novel_G000825	BGI_novel_G001161	BGI_novel_G001082	BGI_novel_G000805	BGI_novel_G000435	BGI_novel_G000918	BGI_novel_G000842
BGI_novel_G000904	BGI_novel_G000878	BGI_novel_G000924	BGI_novel_G000747	BGI_novel_G000827	BGI_novel_G000836	BGI_novel_G001172	BGI_novel_G001099	BGI_novel_G000853	BGI_novel_G000436	BGI_novel_G000945	BGI_novel_G000847
BGI_novel_G000907	BGI_novel_G000941	BGI_novel_G000925	BGI_novel_G000766	BGI_novel_G000838	BGI_novel_G000864	BGI_novel_G001174	BGI_novel_G001124	BGI_novel_G000858	BGI_novel_G000455	BGI_novel_G000951	BGI_novel_G000905
BGI_novel_G000908	BGI_novel_G000949	BGI_novel_G000928	BGI_novel_G000788	BGI_novel_G000851	BGI_novel_G000869	BGI_novel_G001186	BGI_novel_G001128	BGI_novel_G000870	BGI_novel_G000456	BGI_novel_G000954	BGI_novel_G000921
BGI_novel_G000912	BGI_novel_G000961	BGI_novel_G000929	BGI_novel_G000789	BGI_novel_G000855	BGI_novel_G000875	BGI_novel_G001193	BGI_novel_G001129	BGI_novel_G000877	BGI_novel_G000457	BGI_novel_G000974	BGI_novel_G000943
BGI_novel_G000913	BGI_novel_G000973	BGI_novel_G000931	BGI_novel_G000796	BGI_novel_G000862	BGI_novel_G000876	BGI_novel_G001210	BGI_novel_G001130	BGI_novel_G000906	BGI_novel_G000466	BGI_novel_G000988	BGI_novel_G000944
BGI_novel_G000930	BGI_novel_G000997	BGI_novel_G000953	BGI_novel_G000808	BGI_novel_G000891	BGI_novel_G000910	BGI_novel_G001266	BGI_novel_G001157	BGI_novel_G000919	BGI_novel_G000467	BGI_novel_G000990	BGI_novel_G000955
BGI_novel_G000936	BGI_novel_G001015	BGI_novel_G000964	BGI_novel_G000812	BGI_novel_G000920	BGI_novel_G000926	BGI_novel_G001342	BGI_novel_G001158	BGI_novel_G000950	BGI_novel_G000556	BGI_novel_G001013	BGI_novel_G000970
BGI_novel_G000940	BGI_novel_G001021	BGI_novel_G000965	BGI_novel_G000824	BGI_novel_G000942	BGI_novel_G000946	BGI_novel_G001357	BGI_novel_G001159	BGI_novel_G000992	BGI_novel_G000558	BGI_novel_G001014	BGI_novel_G000980
BGI_novel_G000947	BGI_novel_G001026	BGI_novel_G000985	BGI_novel_G000834	BGI_novel_G000952	BGI_novel_G000966	BGI_novel_G001369	BGI_novel_G001167	BGI_novel_G000995	BGI_novel_G000571	BGI_novel_G001028	BGI_novel_G001002
BGI_novel_G000963	BGI_novel_G001050	BGI_novel_G001000	BGI_novel_G000835	BGI_novel_G000959	BGI_novel_G000976	BGI_novel_G001448	BGI_novel_G001169	BGI_novel_G001022	BGI_novel_G000575	BGI_novel_G001032	BGI_novel_G001007
BGI_novel_G000967	BGI_novel_G001088	BGI_novel_G001009	BGI_novel_G000850	BGI_novel_G000960	BGI_novel_G000998	BGI_novel_G001458	BGI_novel_G001206	BGI_novel_G001030	BGI_novel_G000579	BGI_novel_G001078	BGI_novel_G001020
BGI_novel_G000971	BGI_novel_G001093	BGI_novel_G001019	BGI_novel_G000854	BGI_novel_G000962	BGI_novel_G001001	BGI_novel_G001474	BGI_novel_G001207	BGI_novel_G001033	BGI_novel_G000583	BGI_novel_G001095	BGI_novel_G001023
BGI_novel_G000975	BGI_novel_G001107	BGI_novel_G001025	BGI_novel_G000860	BGI_novel_G000968	BGI_novel_G001006	BGI_novel_G001483	BGI_novel_G001278	BGI_novel_G001037	BGI_novel_G000584	BGI_novel_G001096	BGI_novel_G001053
BGI_novel_G000977	BGI_novel_G001127	BGI_novel_G001029	BGI_novel_G000863	BGI_novel_G000996	BGI_novel_G001016	BGI_novel_G001494	BGI_novel_G001279	BGI_novel_G001056	BGI_novel_G000593	BGI_novel_G001101	BGI_novel_G001070
BGI_novel_G000986	BGI_novel_G001135	BGI_novel_G001040	BGI_novel_G000886	BGI_novel_G001049	BGI_novel_G001038	BGI_novel_G001499	BGI_novel_G001309	BGI_novel_G001064	BGI_novel_G000596	BGI_novel_G001105	BGI_novel_G001087
BGI_novel_G000987	BGI_novel_G001148	BGI_novel_G001041	BGI_novel_G000892	BGI_novel_G001061	BGI_novel_G001045	BGI_novel_G001521	BGI_novel_G001338	BGI_novel_G001066	BGI_novel_G000604	BGI_novel_G001112	BGI_novel_G001090
BGI_novel_G001005	BGI_novel_G001156	BGI_novel_G001048	BGI_novel_G000899	BGI_novel_G001067	BGI_novel_G001060	BGI_novel_G001557	BGI_novel_G001383	BGI_novel_G001068	BGI_novel_G000606	BGI_novel_G001117	BGI_novel_G001091
BGI_novel_G001011	BGI_novel_G001177	BGI_novel_G001057	BGI_novel_G000909	BGI_novel_G001076	BGI_novel_G001073	BGI_novel_G001564	BGI_novel_G001409	BGI_novel_G001071	BGI_novel_G000608	BGI_novel_G001122	BGI_novel_G001103
BGI_novel_G001042	BGI_novel_G001198	BGI_novel_G001063	BGI_novel_G000911	BGI_novel_G001079	BGI_novel_G001089	BGI_novel_G001566	BGI_novel_G001421	BGI_novel_G001075	BGI_novel_G000636	BGI_novel_G001141	BGI_novel_G001120
BGI_novel_G001059	BGI_novel_G001213	BGI_novel_G001081	BGI_novel_G000927	BGI_novel_G001136	BGI_novel_G001098	BGI_novel_G001596	BGI_novel_G001422	BGI_novel_G001080	BGI_novel_G000653	BGI_novel_G001168	BGI_novel_G001131
BGI_novel_G001126	BGI_novel_G001220	BGI_novel_G001097	BGI_novel_G000937	BGI_novel_G001163	BGI_novel_G001125	BGI_novel_G001604	BGI_novel_G001423	BGI_novel_G001113	BGI_novel_G000654	BGI_novel_G001171	BGI_novel_G001132
BGI_novel_G001162	BGI_novel_G001244	BGI_novel_G001111	BGI_novel_G000956	BGI_novel_G001196	BGI_novel_G001184	BGI_novel_G001667	BGI_novel_G001470	BGI_novel_G001139	BGI_novel_G000676	BGI_novel_G001175	BGI_novel_G001134
BGI_novel_G001191	BGI_novel_G001245	BGI_novel_G001114	BGI_novel_G000969	BGI_novel_G001205	BGI_novel_G001219	BGI_novel_G001681	BGI_novel_G001484	BGI_novel_G001140	BGI_novel_G000681	BGI_novel_G001185	BGI_novel_G001165
BGI_novel_G001199	BGI_novel_G001247	BGI_novel_G001118	BGI_novel_G000979	BGI_novel_G001209	BGI_novel_G001227	BGI_novel_G001694	BGI_novel_G001485	BGI_novel_G001144	BGI_novel_G000704	BGI_novel_G001202	BGI_novel_G001173
BGI_novel_G001233	BGI_novel_G001264	BGI_novel_G001166	BGI_novel_G000994	BGI_novel_G001212	BGI_novel_G001241	BGI_novel_G001699	BGI_novel_G001486	BGI_novel_G001145	BGI_novel_G000706	BGI_novel_G001203	BGI_novel_G001176
BGI_novel_G001240	BGI_novel_G001265	BGI_novel_G001182	BGI_novel_G000999	BGI_novel_G001215	BGI_novel_G001259	BGI_novel_G001701	BGI_novel_G001495	BGI_novel_G001146	BGI_novel_G000714	BGI_novel_G001235	BGI_novel_G001195
BGI_novel_G001251	BGI_novel_G001284	BGI_novel_G001192	BGI_novel_G001003	BGI_novel_G001222	BGI_novel_G001282	BGI_novel_G001738	BGI_novel_G001522	BGI_novel_G001149	BGI_novel_G000723	BGI_novel_G001237	BGI_novel_G001211
BGI_novel_G001270	BGI_novel_G001291	BGI_novel_G001197	BGI_novel_G001008	BGI_novel_G001230	BGI_novel_G001287	BGI_novel_G001759	BGI_novel_G001542	BGI_novel_G001150	BGI_novel_G000724	BGI_novel_G001238	BGI_novel_G001218
BGI_novel_G001273	BGI_novel_G001296	BGI_novel_G001283	BGI_novel_G001010	BGI_novel_G001234	BGI_novel_G001290	BGI_novel_G001772	BGI_novel_G001550	BGI_novel_G001152	BGI_novel_G000725	BGI_novel_G001280	BGI_novel_G001221
BGI_novel_G001276	BGI_novel_G001297	BGI_novel_G001286	BGI_novel_G001012	BGI_novel_G001246	BGI_novel_G001294	BGI_novel_G001817	BGI_novel_G001569	BGI_novel_G001153	BGI_novel_G000728	BGI_novel_G001306	BGI_novel_G001223
BGI_novel_G001320	BGI_novel_G001298	BGI_novel_G001303	BGI_novel_G001039	BGI_novel_G001258	BGI_novel_G001302	BGI_novel_G001858	BGI_novel_G001703	BGI_novel_G001154	BGI_novel_G000733	BGI_novel_G001313	BGI_novel_G001229
BGI_novel_G001328	BGI_novel_G001304	BGI_novel_G001307	BGI_novel_G001043	BGI_novel_G001263	BGI_novel_G001323	BGI_novel_G001888	BGI_novel_G001706	BGI_novel_G001180	BGI_novel_G000737	BGI_novel_G001317	BGI_novel_G001232
BGI_novel_G001330	BGI_novel_G001305	BGI_novel_G001316	BGI_novel_G001046	BGI_novel_G001293	BGI_novel_G001324	BGI_novel_G001893	BGI_novel_G001708	BGI_novel_G001181	BGI_novel_G000752	BGI_novel_G001319	BGI_novel_G001255
BGI_novel_G001335	BGI_novel_G001310	BGI_novel_G001322	BGI_novel_G001051	BGI_novel_G001295	BGI_novel_G001331	BGI_novel_G001919	BGI_novel_G001709	BGI_novel_G001187	BGI_novel_G000760	BGI_novel_G001346	BGI_novel_G001256
BGI_novel_G001337	BGI_novel_G001314	BGI_novel_G001352	BGI_novel_G001055	BGI_novel_G001315	BGI_novel_G001332	BGI_novel_G001927	BGI_novel_G001717	BGI_novel_G001188	BGI_novel_G000771	BGI_novel_G001348	BGI_novel_G001281
BGI_novel_G001353	BGI_novel_G001356	BGI_novel_G001370	BGI_novel_G001058	BGI_novel_G001318	BGI_novel_G001333	BGI_novel_G001930	BGI_novel_G001721	BGI_novel_G001189	BGI_novel_G000772	BGI_novel_G001362	BGI_novel_G001288
BGI_novel_G001359	BGI_novel_G001368	BGI_novel_G001376	BGI_novel_G001062	BGI_novel_G001325	BGI_novel_G001345	BGI_novel_G001934	BGI_novel_G001793	BGI_novel_G001190	BGI_novel_G000773	BGI_novel_G001375	BGI_novel_G001299
BGI_novel_G001361	BGI_novel_G001378	BGI_novel_G001382	BGI_novel_G001092	BGI_novel_G001334	BGI_novel_G001349	BGI_novel_G001987	BGI_novel_G001801	BGI_novel_G001200	BGI_novel_G000780	BGI_novel_G001380	BGI_novel_G001308
BGI_novel_G001364	BGI_novel_G001399	BGI_novel_G001394	BGI_novel_G001094	BGI_novel_G001341	BGI_novel_G001360	BGI_novel_G002024	BGI_novel_G001826	BGI_novel_G001217	BGI_novel_G000782	BGI_novel_G001388	BGI_novel_G001311
BGI_novel_G001391	BGI_novel_G001415	BGI_novel_G001412	BGI_novel_G001108	BGI_novel_G001358	BGI_novel_G001366	BGI_novel_G002044	BGI_novel_G001836	BGI_novel_G001228	BGI_novel_G000806	BGI_novel_G001408	BGI_novel_G001347
BGI_novel_G001396	BGI_novel_G001418	BGI_novel_G001416	BGI_novel_G001116	BGI_novel_G001363	BGI_novel_G001371	BGI_novel_G002049	BGI_novel_G001855	BGI_novel_G001242	BGI_novel_G000816	BGI_novel_G001439	BGI_novel_G001379
BGI_novel_G001400	BGI_novel_G001419	BGI_novel_G001435	BGI_novel_G001121	BGI_novel_G001381	BGI_novel_G001393	BGI_novel_G002086	BGI_novel_G001902	BGI_novel_G001254	BGI_novel_G000832	BGI_novel_G001454	BGI_novel_G001392
BGI_novel_G001493	BGI_novel_G001437	BGI_novel_G001456	BGI_novel_G001147	BGI_novel_G001385	BGI_novel_G001417	BGI_novel_G002095	BGI_novel_G001932	BGI_novel_G001260	BGI_novel_G000837	BGI_novel_G001461	BGI_novel_G001398
BGI_novel_G001500	BGI_novel_G001452	BGI_novel_G001479	BGI_novel_G001155	BGI_novel_G001432	BGI_novel_G001425	BGI_novel_G002098	BGI_novel_G001964	BGI_novel_G001262	BGI_novel_G000845	BGI_novel_G001468	BGI_novel_G001411
BGI_novel_G001501	BGI_novel_G001473	BGI_novel_G001496	BGI_novel_G001194	BGI_novel_G001434	BGI_novel_G001433	BGI_novel_G002139	BGI_novel_G001975	BGI_novel_G001301	BGI_novel_G000846	BGI_novel_G001471	BGI_novel_G001430
BGI_novel_G001502	BGI_novel_G001476	BGI_novel_G001551	BGI_novel_G001208	BGI_novel_G001480	BGI_novel_G001482	BGI_novel_G002151	BGI_novel_G002006	BGI_novel_G001312	BGI_novel_G000859	BGI_novel_G001506	BGI_novel_G001431
BGI_novel_G001504	BGI_novel_G001477	BGI_novel_G001552	BGI_novel_G001216	BGI_novel_G001489	BGI_novel_G001488	BGI_novel_G002161	BGI_novel_G002018	BGI_novel_G001340	BGI_novel_G000865	BGI_novel_G001507	BGI_novel_G001436
BGI_novel_G001561	BGI_novel_G001487	BGI_novel_G001570	BGI_novel_G001225	BGI_novel_G001491	BGI_novel_G001498	BGI_novel_G002173	BGI_novel_G002021	BGI_novel_G001344	BGI_novel_G000866	BGI_novel_G001545	BGI_novel_G001438
BGI_novel_G001562	BGI_novel_G001511	BGI_novel_G001585	BGI_novel_G001226	BGI_novel_G001492	BGI_novel_G001508	BGI_novel_G002227	BGI_novel_G002070	BGI_novel_G001355	BGI_novel_G000867	BGI_novel_G001546	BGI_novel_G001457
BGI_novel_G001567	BGI_novel_G001513	BGI_novel_G001612	BGI_novel_G001236	BGI_novel_G001517	BGI_novel_G001538	BGI_novel_G002229	BGI_novel_G002071	BGI_novel_G001389	BGI_novel_G000873	BGI_novel_G001574	BGI_novel_G001462
BGI_novel_G001572	BGI_novel_G001514	BGI_novel_G001637	BGI_novel_G001239	BGI_novel_G001529	BGI_novel_G001541	BGI_novel_G002253	BGI_novel_G002073	BGI_novel_G001397	BGI_novel_G000896	BGI_novel_G001586	BGI_novel_G001467
BGI_novel_G001610	BGI_novel_G001515	BGI_novel_G001656	BGI_novel_G001248	BGI_novel_G001543	BGI_novel_G001568	BGI_novel_G002284	BGI_novel_G002075	BGI_novel_G001401	BGI_novel_G000915	BGI_novel_G001619	BGI_novel_G001475
BGI_novel_G001620	BGI_novel_G001516	BGI_novel_G001666	BGI_novel_G001268	BGI_novel_G001544	BGI_novel_G001591	BGI_novel_G002289	BGI_novel_G002076	BGI_novel_G001402	BGI_novel_G000917	BGI_novel_G001621	BGI_novel_G001490
BGI_novel_G001623	BGI_novel_G001518	BGI_novel_G001730	BGI_novel_G001277	BGI_novel_G001547	BGI_novel_G001600	BGI_novel_G002300	BGI_novel_G002077	BGI_novel_G001404	BGI_novel_G000933	BGI_novel_G001622	BGI_novel_G001526
BGI_novel_G001624	BGI_novel_G001523	BGI_novel_G001734	BGI_novel_G001326	BGI_novel_G001548	BGI_novel_G001611	BGI_novel_G002301	BGI_novel_G002091	BGI_novel_G001405	BGI_novel_G000934	BGI_novel_G001668	BGI_novel_G001563
BGI_novel_G001648	BGI_novel_G001525	BGI_novel_G001763	BGI_novel_G001327	BGI_novel_G001553	BGI_novel_G001614	BGI_novel_G002337	BGI_novel_G002112	BGI_novel_G001406	BGI_novel_G000935	BGI_novel_G001669	BGI_novel_G001576
BGI_novel_G001655	BGI_novel_G001527	BGI_novel_G001788	BGI_novel_G001350	BGI_novel_G001571	BGI_novel_G001615	BGI_novel_G002342	BGI_novel_G002165	BGI_novel_G001440	BGI_novel_G000939	BGI_novel_G001678	BGI_novel_G001578
BGI_novel_G001691	BGI_novel_G001530	BGI_novel_G001822	BGI_novel_G001365	BGI_novel_G001583	BGI_novel_G001629	BGI_novel_G002350	BGI_novel_G002187	BGI_novel_G001441	BGI_novel_G000972	BGI_novel_G001697	BGI_novel_G001581
BGI_novel_G001692	BGI_novel_G001558	BGI_novel_G001840	BGI_novel_G001367	BGI_novel_G001584	BGI_novel_G001632	BGI_novel_G002375	BGI_novel_G002198	BGI_novel_G001442	BGI_novel_G000978	BGI_novel_G001702	BGI_novel_G001582
BGI_novel_G001693	BGI_novel_G001573	BGI_novel_G001849	BGI_novel_G001374	BGI_novel_G001589	BGI_novel_G001643	BGI_novel_G002390	BGI_novel_G002359	BGI_novel_G001443	BGI_novel_G000981	BGI_novel_G001707	BGI_novel_G001594
BGI_novel_G001696	BGI_novel_G001588	BGI_novel_G001863	BGI_novel_G001384	BGI_novel_G001590	BGI_novel_G001650	BGI_novel_G002417	BGI_novel_G002383	BGI_novel_G001444	BGI_novel_G000982	BGI_novel_G001723	BGI_novel_G001602
BGI_novel_G001711	BGI_novel_G001595	BGI_novel_G001880	BGI_novel_G001395	BGI_novel_G001592	BGI_novel_G001657	BGI_novel_G002425	BGI_novel_G002396	BGI_novel_G001451	BGI_novel_G000983	BGI_novel_G001725	BGI_novel_G001628
BGI_novel_G001722	BGI_novel_G001597	BGI_novel_G001898	BGI_novel_G001413	BGI_novel_G001603	BGI_novel_G001658	BGI_novel_G002426	BGI_novel_G002413	BGI_novel_G001532	BGI_novel_G000984	BGI_novel_G001726	BGI_novel_G001631
BGI_novel_G001729	BGI_novel_G001608	BGI_novel_G001904	BGI_novel_G001414	BGI_novel_G001625	BGI_novel_G001659	BGI_novel_G002440	BGI_novel_G002424	BGI_novel_G001535	BGI_novel_G001004	BGI_novel_G001740	BGI_novel_G001638
BGI_novel_G001739	BGI_novel_G001633	BGI_novel_G001923	BGI_novel_G001445	BGI_novel_G001639	BGI_novel_G001660	BGI_novel_G002441	BGI_novel_G002430	BGI_novel_G001536	BGI_novel_G001018	BGI_novel_G001776	BGI_novel_G001644
BGI_novel_G001757	BGI_novel_G001634	BGI_novel_G001931	BGI_novel_G001447	BGI_novel_G001645	BGI_novel_G001684	BGI_novel_G002448	BGI_novel_G002521	BGI_novel_G001539	BGI_novel_G001034	BGI_novel_G001837	BGI_novel_G001651
BGI_novel_G001779	BGI_novel_G001642	BGI_novel_G001963	BGI_novel_G001453	BGI_novel_G001715	BGI_novel_G001688	BGI_novel_G002449	BGI_novel_G002552	BGI_novel_G001549	BGI_novel_G001036	BGI_novel_G001848	BGI_novel_G001662
BGI_novel_G001780	BGI_novel_G001646	BGI_novel_G001967	BGI_novel_G001478	BGI_novel_G001716	BGI_novel_G001714	BGI_novel_G002467	BGI_novel_G002590	BGI_novel_G001587	BGI_novel_G001052	BGI_novel_G001859	BGI_novel_G001682
BGI_novel_G001783	BGI_novel_G001673	BGI_novel_G001973	BGI_novel_G001481	BGI_novel_G001728	BGI_novel_G001731	BGI_novel_G002474	BGI_novel_G002594	BGI_novel_G001607	BGI_novel_G001054	BGI_novel_G001884	BGI_novel_G001704
BGI_novel_G001784	BGI_novel_G001679	BGI_novel_G001976	BGI_novel_G001497	BGI_novel_G001737	BGI_novel_G001742	BGI_novel_G002475	BGI_novel_G002595	BGI_novel_G001627	BGI_novel_G001065	BGI_novel_G001917	BGI_novel_G001705
BGI_novel_G001802	BGI_novel_G001685	BGI_novel_G001980	BGI_novel_G001503	BGI_novel_G001769	BGI_novel_G001761	BGI_novel_G002483	BGI_novel_G002596	BGI_novel_G001630	BGI_novel_G001069	BGI_novel_G001962	BGI_novel_G001710
BGI_novel_G001806	BGI_novel_G001686	BGI_novel_G001982	BGI_novel_G001509	BGI_novel_G001771	BGI_novel_G001773	BGI_novel_G002511	BGI_novel_G002605	BGI_novel_G001649	BGI_novel_G001072	BGI_novel_G001996	BGI_novel_G001712
BGI_novel_G001816	BGI_novel_G001689	BGI_novel_G001983	BGI_novel_G001510	BGI_novel_G001792	BGI_novel_G001781	BGI_novel_G002515	BGI_novel_G002622	BGI_novel_G001652	BGI_novel_G001074	BGI_novel_G002005	BGI_novel_G001713
BGI_novel_G001821	BGI_novel_G001743	BGI_novel_G002011	BGI_novel_G001519	BGI_novel_G001829	BGI_novel_G001786	BGI_novel_G002518	BGI_novel_G002632	BGI_novel_G001654	BGI_novel_G001077	BGI_novel_G002014	BGI_novel_G001735
BGI_novel_G001842	BGI_novel_G001745	BGI_novel_G002012	BGI_novel_G001520	BGI_novel_G001835	BGI_novel_G001804	BGI_novel_G002519	BGI_novel_G002647	BGI_novel_G001663	BGI_novel_G001083	BGI_novel_G002016	BGI_novel_G001760
BGI_novel_G001852	BGI_novel_G001764	BGI_novel_G002017	BGI_novel_G001531	BGI_novel_G001838	BGI_novel_G001807	BGI_novel_G002524	BGI_novel_G002688	BGI_novel_G001664	BGI_novel_G001084	BGI_novel_G002023	BGI_novel_G001765
BGI_novel_G001865	BGI_novel_G001768	BGI_novel_G002026	BGI_novel_G001533	BGI_novel_G001847	BGI_novel_G001812	BGI_novel_G002525	BGI_novel_G002701	BGI_novel_G001674	BGI_novel_G001085	BGI_novel_G002043	BGI_novel_G001767
BGI_novel_G001872	BGI_novel_G001777	BGI_novel_G002069	BGI_novel_G001540	BGI_novel_G001857	BGI_novel_G001814	BGI_novel_G002534	BGI_novel_G002713	BGI_novel_G001675	BGI_novel_G001100	BGI_novel_G002045	BGI_novel_G001770
BGI_novel_G001874	BGI_novel_G001782	BGI_novel_G002124	BGI_novel_G001554	BGI_novel_G001862	BGI_novel_G001832	BGI_novel_G002542	BGI_novel_G002750	BGI_novel_G001676	BGI_novel_G001102	BGI_novel_G002055	BGI_novel_G001808
BGI_novel_G001887	BGI_novel_G001791	BGI_novel_G002127	BGI_novel_G001560	BGI_novel_G001885	BGI_novel_G001843	BGI_novel_G002553	BGI_novel_G002751	BGI_novel_G001680	BGI_novel_G001104	BGI_novel_G002064	BGI_novel_G001828
BGI_novel_G001889	BGI_novel_G001800	BGI_novel_G002213	BGI_novel_G001575	BGI_novel_G001891	BGI_novel_G001860	BGI_novel_G002591	BGI_novel_G002753	BGI_novel_G001683	BGI_novel_G001106	BGI_novel_G002065	BGI_novel_G001830
BGI_novel_G001890	BGI_novel_G001805	BGI_novel_G002224	BGI_novel_G001577	BGI_novel_G001894	BGI_novel_G001861	BGI_novel_G002616	BGI_novel_G002758	BGI_novel_G001698	BGI_novel_G001133	BGI_novel_G002066	BGI_novel_G001834
BGI_novel_G001892	BGI_novel_G001818	BGI_novel_G002240	BGI_novel_G001579	BGI_novel_G001896	BGI_novel_G001870	BGI_novel_G002625	BGI_novel_G002779	BGI_novel_G001700	BGI_novel_G001137	BGI_novel_G002113	BGI_novel_G001846
BGI_novel_G001907	BGI_novel_G001844	BGI_novel_G002258	BGI_novel_G001580	BGI_novel_G001897	BGI_novel_G001878	BGI_novel_G002626	BGI_novel_G002786	BGI_novel_G001727	BGI_novel_G001138	BGI_novel_G002129	BGI_novel_G001853
BGI_novel_G001936	BGI_novel_G001876	BGI_novel_G002265	BGI_novel_G001601	BGI_novel_G001905	BGI_novel_G001879	BGI_novel_G002666	BGI_novel_G002794	BGI_novel_G001744	BGI_novel_G001142	BGI_novel_G002159	BGI_novel_G001856
BGI_novel_G001941	BGI_novel_G001886	BGI_novel_G002340	BGI_novel_G001613	BGI_novel_G001924	BGI_novel_G001895	BGI_novel_G002682	BGI_novel_G002802	BGI_novel_G001762	BGI_novel_G001143	BGI_novel_G002166	BGI_novel_G001867
BGI_novel_G001943	BGI_novel_G001925	BGI_novel_G002354	BGI_novel_G001617	BGI_novel_G001952	BGI_novel_G001901	BGI_novel_G002691	BGI_novel_G002804	BGI_novel_G001798	BGI_novel_G001160	BGI_novel_G002205	BGI_novel_G001877
BGI_novel_G001946	BGI_novel_G001926	BGI_novel_G002418	BGI_novel_G001618	BGI_novel_G001986	BGI_novel_G001918	BGI_novel_G002697	BGI_novel_G002826	BGI_novel_G001823	BGI_novel_G001170	BGI_novel_G002206	BGI_novel_G001913
BGI_novel_G001947	BGI_novel_G001984	BGI_novel_G002422	BGI_novel_G001626	BGI_novel_G001992	BGI_novel_G001920	BGI_novel_G002714	BGI_novel_G002831	BGI_novel_G001824	BGI_novel_G001178	BGI_novel_G002207	BGI_novel_G001914
BGI_novel_G001966	BGI_novel_G002003	BGI_novel_G002432	BGI_novel_G001635	BGI_novel_G002010	BGI_novel_G001937	BGI_novel_G002720	BGI_novel_G002841	BGI_novel_G001854	BGI_novel_G001179	BGI_novel_G002242	BGI_novel_G001944
BGI_novel_G001989	BGI_novel_G002050	BGI_novel_G002461	BGI_novel_G001636	BGI_novel_G002013	BGI_novel_G001950	BGI_novel_G002742	BGI_novel_G002847	BGI_novel_G001869	BGI_novel_G001183	BGI_novel_G002244	BGI_novel_G001945
BGI_novel_G002001	BGI_novel_G002063	BGI_novel_G002507	BGI_novel_G001647	BGI_novel_G002015	BGI_novel_G001957	BGI_novel_G002752	BGI_novel_G002850	BGI_novel_G001881	BGI_novel_G001201	BGI_novel_G002261	BGI_novel_G001953
BGI_novel_G002009	BGI_novel_G002074	BGI_novel_G002529	BGI_novel_G001653	BGI_novel_G002019	BGI_novel_G001969	BGI_novel_G002755	BGI_novel_G002858	BGI_novel_G001910	BGI_novel_G001214	BGI_novel_G002277	BGI_novel_G001965
BGI_novel_G002030	BGI_novel_G002079	BGI_novel_G002536	BGI_novel_G001665	BGI_novel_G002020	BGI_novel_G001971	BGI_novel_G002774	BGI_novel_G002906	BGI_novel_G001911	BGI_novel_G001224	BGI_novel_G002281	BGI_novel_G001974
BGI_novel_G002032	BGI_novel_G002150	BGI_novel_G002540	BGI_novel_G001677	BGI_novel_G002025	BGI_novel_G001972	BGI_novel_G002777	BGI_novel_G002912	BGI_novel_G001921	BGI_novel_G001231	BGI_novel_G002299	BGI_novel_G001978
BGI_novel_G002084	BGI_novel_G002153	BGI_novel_G002556	BGI_novel_G001687	BGI_novel_G002046	BGI_novel_G001979	BGI_novel_G002778	BGI_novel_G002921	BGI_novel_G001951	BGI_novel_G001243	BGI_novel_G002335	BGI_novel_G001981
BGI_novel_G002138	BGI_novel_G002154	BGI_novel_G002564	BGI_novel_G001718	BGI_novel_G002051	BGI_novel_G001985	BGI_novel_G002780	CCA0001S0021	BGI_novel_G001959	BGI_novel_G001249	BGI_novel_G002343	BGI_novel_G002031
BGI_novel_G002174	BGI_novel_G002170	BGI_novel_G002606	BGI_novel_G001720	BGI_novel_G002067	BGI_novel_G001998	BGI_novel_G002790	CCA0001S0035	BGI_novel_G001960	BGI_novel_G001261	BGI_novel_G002344	BGI_novel_G002040
BGI_novel_G002182	BGI_novel_G002177	BGI_novel_G002640	BGI_novel_G001732	BGI_novel_G002102	BGI_novel_G002029	BGI_novel_G002808	CCA0006S0007	BGI_novel_G001961	BGI_novel_G001267	BGI_novel_G002377	BGI_novel_G002042
BGI_novel_G002186	BGI_novel_G002211	BGI_novel_G002643	BGI_novel_G001733	BGI_novel_G002110	BGI_novel_G002034	BGI_novel_G002812	CCA0006S0009	BGI_novel_G001991	BGI_novel_G001269	BGI_novel_G002380	BGI_novel_G002048
BGI_novel_G002218	BGI_novel_G002216	BGI_novel_G002653	BGI_novel_G001736	BGI_novel_G002111	BGI_novel_G002035	BGI_novel_G002818	CCA0007S0002	BGI_novel_G001993	BGI_novel_G001271	BGI_novel_G002410	BGI_novel_G002080
BGI_novel_G002228	BGI_novel_G002231	BGI_novel_G002660	BGI_novel_G001741	BGI_novel_G002114	BGI_novel_G002039	BGI_novel_G002849	CCA0011S0002	BGI_novel_G002008	BGI_novel_G001274	BGI_novel_G002482	BGI_novel_G002083
BGI_novel_G002233	BGI_novel_G002269	BGI_novel_G002661	BGI_novel_G001746	BGI_novel_G002115	BGI_novel_G002041	BGI_novel_G002904	CCA0014S0014	BGI_novel_G002052	BGI_novel_G001275	BGI_novel_G002512	BGI_novel_G002105
BGI_novel_G002257	BGI_novel_G002272	BGI_novel_G002712	BGI_novel_G001747	BGI_novel_G002117	BGI_novel_G002056	BGI_novel_G002905	CCA0014S0023	BGI_novel_G002061	BGI_novel_G001285	BGI_novel_G002554	BGI_novel_G002156
BGI_novel_G002319	BGI_novel_G002278	BGI_novel_G002734	BGI_novel_G001748	BGI_novel_G002119	BGI_novel_G002060	BGI_novel_G002908	CCA0014S0032	BGI_novel_G002068	BGI_novel_G001289	BGI_novel_G002559	BGI_novel_G002167
BGI_novel_G002332	BGI_novel_G002279	BGI_novel_G002783	BGI_novel_G001749	BGI_novel_G002141	BGI_novel_G002092	BGI_novel_G002919	CCA0017S0003	BGI_novel_G002072	BGI_novel_G001292	BGI_novel_G002633	BGI_novel_G002168
BGI_novel_G002333	BGI_novel_G002285	BGI_novel_G002793	BGI_novel_G001750	BGI_novel_G002142	BGI_novel_G002100	BGI_novel_G002920	CCA0041S0004	BGI_novel_G002078	BGI_novel_G001300	BGI_novel_G002634	BGI_novel_G002190
BGI_novel_G002364	BGI_novel_G002295	BGI_novel_G002800	BGI_novel_G001751	BGI_novel_G002172	BGI_novel_G002107	BGI_novel_G002936	CCA0043S0001	BGI_novel_G002109	BGI_novel_G001321	BGI_novel_G002635	BGI_novel_G002200
BGI_novel_G002404	BGI_novel_G002308	BGI_novel_G002820	BGI_novel_G001752	BGI_novel_G002193	BGI_novel_G002140	CCA0001S0008	CCA0050S0001	BGI_novel_G002132	BGI_novel_G001336	BGI_novel_G002636	BGI_novel_G002208
BGI_novel_G002405	BGI_novel_G002309	BGI_novel_G002843	BGI_novel_G001753	BGI_novel_G002194	BGI_novel_G002183	CCA0006S0012	CCA0063S0005	BGI_novel_G002133	BGI_novel_G001339	BGI_novel_G002637	BGI_novel_G002220
BGI_novel_G002416	BGI_novel_G002316	BGI_novel_G002886	BGI_novel_G001754	BGI_novel_G002199	BGI_novel_G002191	CCA0006S0017	CCA0082S0015	BGI_novel_G002134	BGI_novel_G001343	BGI_novel_G002638	BGI_novel_G002243
BGI_novel_G002428	BGI_novel_G002318	BGI_novel_G002899	BGI_novel_G001755	BGI_novel_G002209	BGI_novel_G002192	CCA0008S0002	CCA0090S0007	BGI_novel_G002143	BGI_novel_G001351	BGI_novel_G002641	BGI_novel_G002276
BGI_novel_G002433	BGI_novel_G002323	CCA0001S0015	BGI_novel_G001756	BGI_novel_G002222	BGI_novel_G002232	CCA0014S0034	CCA0095S0007	BGI_novel_G002144	BGI_novel_G001354	BGI_novel_G002642	BGI_novel_G002291
BGI_novel_G002447	BGI_novel_G002324	CCA0001S0016	BGI_novel_G001758	BGI_novel_G002239	BGI_novel_G002237	CCA0018S0002	CCA0108S0015	BGI_novel_G002145	BGI_novel_G001372	BGI_novel_G002664	BGI_novel_G002294
BGI_novel_G002450	BGI_novel_G002325	CCA0001S0019	BGI_novel_G001787	BGI_novel_G002262	BGI_novel_G002241	CCA0022S0003	CCA0108S0019	BGI_novel_G002149	BGI_novel_G001377	BGI_novel_G002690	BGI_novel_G002306
BGI_novel_G002452	BGI_novel_G002326	CCA0001S0020	BGI_novel_G001795	BGI_novel_G002287	BGI_novel_G002248	CCA0039S0006	CCA0122S0003	BGI_novel_G002152	BGI_novel_G001386	BGI_novel_G002694	BGI_novel_G002307
BGI_novel_G002456	BGI_novel_G002327	CCA0001S0026	BGI_novel_G001797	BGI_novel_G002297	BGI_novel_G002255	CCA0039S0012	CCA0126S0006	BGI_novel_G002157	BGI_novel_G001387	BGI_novel_G002696	BGI_novel_G002338
BGI_novel_G002468	BGI_novel_G002329	CCA0001S0029	BGI_novel_G001799	BGI_novel_G002310	BGI_novel_G002264	CCA0039S0015	CCA0126S0008	BGI_novel_G002164	BGI_novel_G001390	BGI_novel_G002698	BGI_novel_G002349
BGI_novel_G002469	BGI_novel_G002334	CCA0003S0001	BGI_novel_G001811	BGI_novel_G002314	BGI_novel_G002266	CCA0051S0005	CCA0143S0001	BGI_novel_G002175	BGI_novel_G001403	BGI_novel_G002707	BGI_novel_G002352
BGI_novel_G002478	BGI_novel_G002345	CCA0006S0016	BGI_novel_G001815	BGI_novel_G002328	BGI_novel_G002268	CCA0051S0007	CCA0143S0005	BGI_novel_G002184	BGI_novel_G001410	BGI_novel_G002715	BGI_novel_G002363
BGI_novel_G002516	BGI_novel_G002353	CCA0007S0004	BGI_novel_G001819	BGI_novel_G002348	BGI_novel_G002282	CCA0082S0004	CCA0147S0002	BGI_novel_G002188	BGI_novel_G001424	BGI_novel_G002726	BGI_novel_G002367
BGI_novel_G002517	BGI_novel_G002362	CCA0014S0016	BGI_novel_G001820	BGI_novel_G002373	BGI_novel_G002298	CCA0082S0010	CCA0163S0005	BGI_novel_G002196	BGI_novel_G001426	BGI_novel_G002769	BGI_novel_G002371
BGI_novel_G002543	BGI_novel_G002368	CCA0014S0025	BGI_novel_G001827	BGI_novel_G002392	BGI_novel_G002356	CCA0082S0017	CCA0183S0010	BGI_novel_G002201	BGI_novel_G001427	BGI_novel_G002773	BGI_novel_G002382
BGI_novel_G002548	BGI_novel_G002369	CCA0018S0001	BGI_novel_G001833	BGI_novel_G002395	BGI_novel_G002372	CCA0086S0007	CCA0183S0013	BGI_novel_G002225	BGI_novel_G001428	BGI_novel_G002787	BGI_novel_G002402
BGI_novel_G002550	BGI_novel_G002370	CCA0019S0001	BGI_novel_G001839	BGI_novel_G002409	BGI_novel_G002406	CCA0086S0010	CCA0183S0021	BGI_novel_G002226	BGI_novel_G001429	BGI_novel_G002788	BGI_novel_G002419
BGI_novel_G002577	BGI_novel_G002374	CCA0023S0008	BGI_novel_G001850	BGI_novel_G002427	BGI_novel_G002407	CCA0104S0001	CCA0196S0005	BGI_novel_G002249	BGI_novel_G001446	BGI_novel_G002789	BGI_novel_G002420
BGI_novel_G002581	BGI_novel_G002379	CCA0033S0003	BGI_novel_G001864	BGI_novel_G002444	BGI_novel_G002434	CCA0108S0021	CCA0198S0001	BGI_novel_G002273	BGI_novel_G001449	BGI_novel_G002791	BGI_novel_G002436
BGI_novel_G002617	BGI_novel_G002384	CCA0033S0004	BGI_novel_G001866	BGI_novel_G002466	BGI_novel_G002443	CCA0112S0001	CCA0214S0001	BGI_novel_G002274	BGI_novel_G001450	BGI_novel_G002792	BGI_novel_G002446
BGI_novel_G002623	BGI_novel_G002386	CCA0033S0006	BGI_novel_G001873	BGI_novel_G002494	BGI_novel_G002455	CCA0112S0002	CCA0259S0002	BGI_novel_G002286	BGI_novel_G001459	BGI_novel_G002810	BGI_novel_G002465
BGI_novel_G002639	BGI_novel_G002389	CCA0036S0001	BGI_novel_G001875	BGI_novel_G002495	BGI_novel_G002470	CCA0126S0007	CCA0263S0002	BGI_novel_G002292	BGI_novel_G001460	BGI_novel_G002823	BGI_novel_G002486
BGI_novel_G002662	BGI_novel_G002399	CCA0051S0003	BGI_novel_G001882	BGI_novel_G002496	BGI_novel_G002471	CCA0129S0004	CCA0274S0004	BGI_novel_G002293	BGI_novel_G001469	BGI_novel_G002833	BGI_novel_G002488
BGI_novel_G002678	BGI_novel_G002401	CCA0052S0002	BGI_novel_G001883	BGI_novel_G002504	BGI_novel_G002492	CCA0134S0001	CCA0277S0002	BGI_novel_G002296	BGI_novel_G001472	BGI_novel_G002834	BGI_novel_G002489
BGI_novel_G002679	BGI_novel_G002423	CCA0069S0002	BGI_novel_G001903	BGI_novel_G002527	BGI_novel_G002501	CCA0134S0003	CCA0277S0003	BGI_novel_G002303	BGI_novel_G001505	BGI_novel_G002846	BGI_novel_G002491
BGI_novel_G002687	BGI_novel_G002435	CCA0069S0004	BGI_novel_G001906	BGI_novel_G002533	BGI_novel_G002503	CCA0137S0001	CCA0277S0006	BGI_novel_G002304	BGI_novel_G001534	BGI_novel_G002856	BGI_novel_G002508
BGI_novel_G002705	BGI_novel_G002472	CCA0073S0001	BGI_novel_G001912	BGI_novel_G002535	BGI_novel_G002506	CCA0149S0005	CCA0309S0001	BGI_novel_G002305	BGI_novel_G001537	BGI_novel_G002862	BGI_novel_G002549
BGI_novel_G002711	BGI_novel_G002484	CCA0082S0008	BGI_novel_G001933	BGI_novel_G002537	BGI_novel_G002544	CCA0156S0006	CCA0313S0001	BGI_novel_G002311	BGI_novel_G001555	BGI_novel_G002863	BGI_novel_G002557
BGI_novel_G002717	BGI_novel_G002497	CCA0082S0016	BGI_novel_G001938	BGI_novel_G002538	BGI_novel_G002545	CCA0165S0006	CCA0376S0003	BGI_novel_G002312	BGI_novel_G001559	CCA0006S0005	BGI_novel_G002569
BGI_novel_G002732	BGI_novel_G002528	CCA0083S0001	BGI_novel_G001968	BGI_novel_G002539	BGI_novel_G002546	CCA0170S0001	CCA0381S0001	BGI_novel_G002315	BGI_novel_G001565	CCA0009S0003	BGI_novel_G002575
BGI_novel_G002743	BGI_novel_G002530	CCA0086S0005	BGI_novel_G001970	BGI_novel_G002574	BGI_novel_G002547	CCA0183S0002	CCA0383S0001	BGI_novel_G002331	BGI_novel_G001598	CCA0009S0005	BGI_novel_G002589
BGI_novel_G002806	BGI_novel_G002532	CCA0101S0001	BGI_novel_G001988	BGI_novel_G002648	BGI_novel_G002555	CCA0183S0012	CCA0384S0002	BGI_novel_G002387	BGI_novel_G001599	CCA0014S0030	BGI_novel_G002600
BGI_novel_G002918	BGI_novel_G002541	CCA0103S0004	BGI_novel_G001990	BGI_novel_G002652	BGI_novel_G002563	CCA0197S0005	CCA0403S0003	BGI_novel_G002391	BGI_novel_G001605	CCA0014S0038	BGI_novel_G002608
BGI_novel_G002935	BGI_novel_G002562	CCA0104S0003	BGI_novel_G001995	BGI_novel_G002672	BGI_novel_G002588	CCA0201S0001	CCA0403S0012	BGI_novel_G002393	BGI_novel_G001606	CCA0015S0001	BGI_novel_G002612
CCA0001S0007	BGI_novel_G002572	CCA0105S0001	BGI_novel_G001997	BGI_novel_G002686	BGI_novel_G002618	CCA0208S0001	CCA0431S0001	BGI_novel_G002394	BGI_novel_G001616	CCA0016S0008	BGI_novel_G002656
CCA0001S0017	BGI_novel_G002573	CCA0106S0003	BGI_novel_G002027	BGI_novel_G002699	BGI_novel_G002620	CCA0218S0001	CCA0434S0001	BGI_novel_G002397	BGI_novel_G001640	CCA0022S0002	BGI_novel_G002659
CCA0001S0022	BGI_novel_G002583	CCA0109S0003	BGI_novel_G002033	BGI_novel_G002700	BGI_novel_G002663	CCA0230S0001	CCA0457S0001	BGI_novel_G002398	BGI_novel_G001641	CCA0023S0001	BGI_novel_G002685
CCA0001S0027	BGI_novel_G002586	CCA0118S0001	BGI_novel_G002047	BGI_novel_G002703	BGI_novel_G002665	CCA0296S0002	CCA0500S0040	BGI_novel_G002400	BGI_novel_G001661	CCA0023S0006	BGI_novel_G002728
CCA0001S0034	BGI_novel_G002587	CCA0128S0002	BGI_novel_G002058	BGI_novel_G002709	BGI_novel_G002669	CCA0304S0001	CCA0500S0047	BGI_novel_G002414	BGI_novel_G001670	CCA0028S0001	BGI_novel_G002733
CCA0002S0003	BGI_novel_G002593	CCA0129S0002	BGI_novel_G002087	BGI_novel_G002710	BGI_novel_G002670	CCA0309S0002	CCA0500S0063	BGI_novel_G002421	BGI_novel_G001671	CCA0035S0003	BGI_novel_G002736
CCA0006S0001	BGI_novel_G002597	CCA0156S0004	BGI_novel_G002089	BGI_novel_G002721	BGI_novel_G002676	CCA0312S0001	CCA0500S0076	BGI_novel_G002429	BGI_novel_G001672	CCA0045S0001	BGI_novel_G002737
CCA0006S0013	BGI_novel_G002598	CCA0176S0004	BGI_novel_G002090	BGI_novel_G002725	BGI_novel_G002681	CCA0353S0001	CCA0500S0077	BGI_novel_G002438	BGI_novel_G001690	CCA0045S0002	BGI_novel_G002740
CCA0013S0003	BGI_novel_G002735	CCA0182S0001	BGI_novel_G002096	BGI_novel_G002754	BGI_novel_G002706	CCA0382S0002	CCA0500S0081	BGI_novel_G002454	BGI_novel_G001695	CCA0051S0004	BGI_novel_G002741
CCA0014S0012	BGI_novel_G002775	CCA0183S0001	BGI_novel_G002097	BGI_novel_G002756	BGI_novel_G002731	CCA0403S0015	CCA0500S0093	BGI_novel_G002479	BGI_novel_G001719	CCA0051S0008	BGI_novel_G002745
CCA0014S0022	BGI_novel_G002798	CCA0183S0017	BGI_novel_G002099	BGI_novel_G002761	BGI_novel_G002738	CCA0421S0001	CCA0500S0102	BGI_novel_G002481	BGI_novel_G001766	CCA0052S0005	BGI_novel_G002747
CCA0017S0008	BGI_novel_G002814	CCA0190S0001	BGI_novel_G002103	BGI_novel_G002801	BGI_novel_G002759	CCA0428S0001	CCA0500S0105	BGI_novel_G002502	BGI_novel_G001775	CCA0058S0001	BGI_novel_G002757
CCA0020S0002	BGI_novel_G002817	CCA0197S0002	BGI_novel_G002104	BGI_novel_G002809	BGI_novel_G002760	CCA0472S0001	CCA0500S0110	BGI_novel_G002510	BGI_novel_G001785	CCA0059S0001	BGI_novel_G002763
CCA0021S0001	BGI_novel_G002824	CCA0203S0001	BGI_novel_G002106	BGI_novel_G002813	BGI_novel_G002811	CCA0497S0001	CCA0500S0128	BGI_novel_G002513	BGI_novel_G001794	CCA0062S0001	BGI_novel_G002776
CCA0024S0004	BGI_novel_G002852	CCA0207S0001	BGI_novel_G002125	BGI_novel_G002835	BGI_novel_G002838	CCA0500S0062	CCA0500S0138	BGI_novel_G002520	BGI_novel_G001796	CCA0063S0007	BGI_novel_G002795
CCA0036S0004	BGI_novel_G002853	CCA0217S0002	BGI_novel_G002126	BGI_novel_G002882	BGI_novel_G002840	CCA0500S0088	CCA0500S0145	BGI_novel_G002566	BGI_novel_G001803	CCA0065S0006	BGI_novel_G002796
CCA0039S0004	BGI_novel_G002857	CCA0241S0001	BGI_novel_G002128	BGI_novel_G002888	BGI_novel_G002859	CCA0500S0111	CCA0500S0148	BGI_novel_G002567	BGI_novel_G001809	CCA0069S0005	BGI_novel_G002799
CCA0039S0007	BGI_novel_G002890	CCA0241S0002	BGI_novel_G002131	BGI_novel_G002896	BGI_novel_G002887	CCA0500S0124	CCA0500S0150	BGI_novel_G002578	BGI_novel_G001810	CCA0081S0002	BGI_novel_G002830
CCA0039S0011	BGI_novel_G002903	CCA0272S0001	BGI_novel_G002137	BGI_novel_G002898	BGI_novel_G002891	CCA0500S0212	CCA0500S0153	BGI_novel_G002579	BGI_novel_G001825	CCA0082S0006	BGI_novel_G002860
CCA0052S0007	BGI_novel_G002927	CCA0272S0002	BGI_novel_G002163	BGI_novel_G002900	BGI_novel_G002916	CCA0500S0220	CCA0500S0160	BGI_novel_G002582	BGI_novel_G001841	CCA0090S0003	BGI_novel_G002861
CCA0053S0004	BGI_novel_G002928	CCA0277S0004	BGI_novel_G002171	BGI_novel_G002911	BGI_novel_G002925	CCA0500S0223	CCA0500S0161	BGI_novel_G002584	BGI_novel_G001845	CCA0090S0008	BGI_novel_G002872
CCA0057S0009	BGI_novel_G002930	CCA0277S0005	BGI_novel_G002180	BGI_novel_G002924	BGI_novel_G002929	CCA0500S0239	CCA0500S0194	BGI_novel_G002585	BGI_novel_G001851	CCA0095S0005	BGI_novel_G002879
CCA0078S0001	CCA0001S0012	CCA0299S0001	BGI_novel_G002189	CCA0001S0032	CCA0001S0011	CCA0500S0250	CCA0500S0195	BGI_novel_G002599	BGI_novel_G001868	CCA0095S0006	BGI_novel_G002880
CCA0085S0001	CCA0001S0014	CCA0356S0002	BGI_novel_G002195	CCA0004S0001	CCA0001S0025	CCA0500S0300	CCA0500S0196	BGI_novel_G002609	BGI_novel_G001871	CCA0101S0003	BGI_novel_G002913
CCA0088S0002	CCA0001S0031	CCA0371S0003	BGI_novel_G002197	CCA0006S0002	CCA0003S0004	CCA0500S0313	CCA0500S0198	BGI_novel_G002610	BGI_novel_G001899	CCA0105S0002	BGI_novel_G002915
CCA0090S0002	CCA0009S0007	CCA0403S0019	BGI_novel_G002202	CCA0006S0018	CCA0003S0007	CCA0500S0342	CCA0500S0222	BGI_novel_G002611	BGI_novel_G001908	CCA0108S0003	BGI_novel_G002934
CCA0093S0001	CCA0013S0001	CCA0464S0001	BGI_novel_G002203	CCA0009S0001	CCA0005S0001	CCA0500S0348	CCA0500S0241	BGI_novel_G002614	BGI_novel_G001915	CCA0108S0017	CCA0001S0030
CCA0110S0003	CCA0014S0033	CCA0489S0001	BGI_novel_G002217	CCA0014S0024	CCA0006S0011	CCA0500S0365	CCA0500S0257	BGI_novel_G002621	BGI_novel_G001916	CCA0108S0025	CCA0005S0004
CCA0113S0001	CCA0024S0005	CCA0500S0038	BGI_novel_G002219	CCA0014S0027	CCA0007S0001	CCA0502S0026	CCA0500S0260	BGI_novel_G002628	BGI_novel_G001928	CCA0108S0027	CCA0006S0010
CCA0124S0003	CCA0044S0001	CCA0500S0042	BGI_novel_G002234	CCA0014S0028	CCA0013S0002	CCA0502S0061	CCA0500S0265	BGI_novel_G002629	BGI_novel_G001929	CCA0126S0005	CCA0016S0001
CCA0126S0004	CCA0052S0008	CCA0500S0048	BGI_novel_G002235	CCA0014S0036	CCA0013S0007	CCA0502S0083	CCA0500S0305	BGI_novel_G002630	BGI_novel_G001935	CCA0129S0003	CCA0016S0007
CCA0140S0001	CCA0052S0009	CCA0500S0064	BGI_novel_G002236	CCA0014S0039	CCA0014S0006	CCA0502S0098	CCA0500S0324	BGI_novel_G002650	BGI_novel_G001940	CCA0133S0004	CCA0017S0007
CCA0146S0001	CCA0066S0001	CCA0500S0072	BGI_novel_G002247	CCA0023S0003	CCA0014S0010	CCA0502S0163	CCA0500S0332	BGI_novel_G002654	BGI_novel_G001942	CCA0133S0005	CCA0020S0005
CCA0148S0002	CCA0076S0001	CCA0500S0083	BGI_novel_G002256	CCA0023S0005	CCA0014S0019	CCA0502S0185	CCA0500S0356	BGI_novel_G002673	BGI_novel_G001948	CCA0136S0001	CCA0042S0002
CCA0161S0001	CCA0101S0002	CCA0500S0090	BGI_novel_G002263	CCA0037S0001	CCA0014S0020	CCA0502S0186	CCA0502S0032	BGI_novel_G002674	BGI_novel_G001954	CCA0141S0002	CCA0051S0002
CCA0165S0004	CCA0108S0002	CCA0500S0115	BGI_novel_G002280	CCA0051S0001	CCA0014S0021	CCA0504S0001	CCA0502S0167	BGI_novel_G002683	BGI_novel_G001955	CCA0143S0003	CCA0058S0002
CCA0183S0020	CCA0108S0008	CCA0500S0142	BGI_novel_G002283	CCA0062S0004	CCA0014S0040	CCA0505S0025	CCA0502S0187	BGI_novel_G002692	BGI_novel_G001956	CCA0156S0005	CCA0063S0002
CCA0196S0001	CCA0108S0016	CCA0500S0143	BGI_novel_G002317	CCA0063S0003	CCA0021S0003	CCA0505S0088	CCA0502S0193	BGI_novel_G002718	BGI_novel_G001994	CCA0176S0005	CCA0063S0011
CCA0200S0001	CCA0108S0028	CCA0500S0144	BGI_novel_G002320	CCA0063S0004	CCA0023S0014	CCA0505S0096	CCA0505S0019	BGI_novel_G002719	BGI_novel_G001999	CCA0183S0005	CCA0082S0011
CCA0228S0001	CCA0122S0002	CCA0500S0162	BGI_novel_G002336	CCA0063S0009	CCA0032S0001	CCA0505S0130	CCA0505S0031	BGI_novel_G002722	BGI_novel_G002000	CCA0183S0011	CCA0082S0014
CCA0246S0002	CCA0133S0006	CCA0500S0165	BGI_novel_G002339	CCA0069S0001	CCA0039S0016	CCA0505S0166	CCA0505S0044	BGI_novel_G002724	BGI_novel_G002002	CCA0183S0016	CCA0084S0001
CCA0250S0002	CCA0142S0004	CCA0500S0166	BGI_novel_G002347	CCA0069S0009	CCA0039S0017	CCA0505S0191	CCA0505S0047	BGI_novel_G002764	BGI_novel_G002004	CCA0205S0001	CCA0090S0009
CCA0264S0002	CCA0151S0002	CCA0500S0170	BGI_novel_G002355	CCA0069S0010	CCA0047S0001	CCA0505S0192	CCA0505S0089	BGI_novel_G002767	BGI_novel_G002022	CCA0213S0001	CCA0095S0002
CCA0297S0001	CCA0159S0002	CCA0500S0187	BGI_novel_G002358	CCA0082S0003	CCA0048S0004	CCA0505S0265	CCA0505S0091	BGI_novel_G002768	BGI_novel_G002028	CCA0213S0002	CCA0147S0005
CCA0311S0002	CCA0166S0006	CCA0500S0190	BGI_novel_G002360	CCA0086S0008	CCA0048S0008	CCA0505S0310	CCA0505S0092	BGI_novel_G002784	BGI_novel_G002053	CCA0217S0001	CCA0162S0001
CCA0316S0001	CCA0179S0001	CCA0500S0200	BGI_novel_G002361	CCA0090S0005	CCA0060S0004	CCA0505S0321	CCA0505S0093	BGI_novel_G002785	BGI_novel_G002054	CCA0246S0001	CCA0169S0005
CCA0362S0001	CCA0196S0003	CCA0500S0206	BGI_novel_G002376	CCA0090S0010	CCA0063S0008	CCA0505S0329	CCA0505S0094	BGI_novel_G002805	BGI_novel_G002057	CCA0252S0001	CCA0172S0002
CCA0390S0001	CCA0201S0002	CCA0500S0214	BGI_novel_G002381	CCA0090S0012	CCA0064S0003	CCA0505S0330	CCA0505S0106	BGI_novel_G002815	BGI_novel_G002059	CCA0263S0001	CCA0174S0001
CCA0390S0004	CCA0215S0002	CCA0500S0225	BGI_novel_G002412	CCA0092S0002	CCA0069S0011	CCA0505S0335	CCA0505S0175	BGI_novel_G002822	BGI_novel_G002081	CCA0267S0001	CCA0183S0008
CCA0393S0001	CCA0221S0001	CCA0500S0235	BGI_novel_G002431	CCA0103S0001	CCA0079S0001	CCA0505S0338	CCA0505S0186	BGI_novel_G002829	BGI_novel_G002082	CCA0277S0001	CCA0208S0003
CCA0395S0001	CCA0250S0001	CCA0500S0244	BGI_novel_G002439	CCA0103S0003	CCA0082S0005	CCA0505S0339	CCA0505S0225	BGI_novel_G002839	BGI_novel_G002085	CCA0288S0001	CCA0211S0001
CCA0403S0020	CCA0256S0002	CCA0500S0248	BGI_novel_G002442	CCA0106S0001	CCA0082S0018	CCA0505S0344	CCA0505S0231	BGI_novel_G002845	BGI_novel_G002093	CCA0295S0001	CCA0211S0002
CCA0403S0022	CCA0261S0001	CCA0500S0252	BGI_novel_G002451	CCA0108S0005	CCA0082S0020	CCA0507S0014	CCA0505S0295	BGI_novel_G002848	BGI_novel_G002094	CCA0300S0001	CCA0212S0001
CCA0421S0002	CCA0264S0001	CCA0500S0263	BGI_novel_G002457	CCA0113S0003	CCA0086S0013	CCA0507S0029	CCA0505S0297	BGI_novel_G002851	BGI_novel_G002108	CCA0302S0001	CCA0217S0003
CCA0431S0007	CCA0266S0001	CCA0500S0270	BGI_novel_G002458	CCA0124S0001	CCA0088S0003	CCA0507S0047	CCA0505S0317	BGI_novel_G002854	BGI_novel_G002116	CCA0303S0004	CCA0225S0001
CCA0452S0001	CCA0274S0003	CCA0500S0274	BGI_novel_G002460	CCA0128S0001	CCA0095S0004	CCA0507S0096	CCA0505S0319	BGI_novel_G002870	BGI_novel_G002118	CCA0305S0002	CCA0235S0001
CCA0469S0001	CCA0284S0001	CCA0500S0276	BGI_novel_G002473	CCA0135S0001	CCA0100S0002	CCA0507S0103	CCA0505S0327	BGI_novel_G002871	BGI_novel_G002120	CCA0329S0002	CCA0236S0001
CCA0471S0001	CCA0315S0001	CCA0500S0278	BGI_novel_G002476	CCA0143S0002	CCA0108S0018	CCA0507S0129	CCA0505S0337	BGI_novel_G002878	BGI_novel_G002121	CCA0344S0001	CCA0239S0001
CCA0475S0001	CCA0322S0002	CCA0500S0280	BGI_novel_G002487	CCA0155S0002	CCA0126S0001	CCA0507S0133	CCA0505S0340	BGI_novel_G002889	BGI_novel_G002122	CCA0377S0001	CCA0242S0001
CCA0488S0001	CCA0327S0002	CCA0500S0357	BGI_novel_G002500	CCA0163S0003	CCA0126S0003	CCA0507S0184	CCA0507S0010	BGI_novel_G002892	BGI_novel_G002130	CCA0386S0001	CCA0247S0002
CCA0500S0056	CCA0361S0001	CCA0502S0007	BGI_novel_G002523	CCA0163S0007	CCA0132S0003	CCA0507S0191	CCA0507S0021	BGI_novel_G002893	BGI_novel_G002147	CCA0403S0007	CCA0260S0003
CCA0500S0068	CCA0363S0001	CCA0502S0016	BGI_novel_G002560	CCA0164S0002	CCA0147S0001	CCA0507S0208	CCA0507S0034	BGI_novel_G002897	BGI_novel_G002155	CCA0403S0023	CCA0303S0002
CCA0500S0084	CCA0378S0001	CCA0502S0018	BGI_novel_G002565	CCA0176S0001	CCA0149S0006	CCA0507S0227	CCA0507S0073	BGI_novel_G002922	BGI_novel_G002158	CCA0412S0002	CCA0326S0003
CCA0500S0089	CCA0403S0024	CCA0502S0028	BGI_novel_G002571	CCA0176S0003	CCA0150S0002	CCA0507S0232	CCA0507S0081	CCA0002S0001	BGI_novel_G002160	CCA0416S0002	CCA0339S0001
CCA0500S0125	CCA0432S0001	CCA0502S0052	BGI_novel_G002602	CCA0177S0001	CCA0154S0001	CCA0507S0242	CCA0507S0085	CCA0003S0006	BGI_novel_G002162	CCA0421S0005	CCA0392S0001
CCA0500S0134	CCA0467S0002	CCA0502S0057	BGI_novel_G002613	CCA0177S0002	CCA0161S0002	CCA0507S0243	CCA0507S0093	CCA0006S0004	BGI_novel_G002169	CCA0438S0001	CCA0403S0004
CCA0500S0149	CCA0483S0001	CCA0502S0060	BGI_novel_G002619	CCA0183S0004	CCA0171S0001	CCA0507S0271	CCA0507S0123	CCA0014S0026	BGI_novel_G002176	CCA0449S0003	CCA0405S0001
CCA0500S0164	CCA0484S0001	CCA0502S0068	BGI_novel_G002624	CCA0183S0007	CCA0172S0001	CCA0507S0278	CCA0507S0150	CCA0014S0037	BGI_novel_G002178	CCA0450S0001	CCA0420S0006
CCA0500S0179	CCA0496S0001	CCA0502S0112	BGI_novel_G002645	CCA0195S0003	CCA0183S0019	CCA0507S0281	CCA0507S0151	CCA0020S0004	BGI_novel_G002181	CCA0456S0001	CCA0431S0005
CCA0500S0181	CCA0500S0015	CCA0502S0127	BGI_novel_G002646	CCA0196S0004	CCA0193S0001	CCA0507S0298	CCA0507S0168	CCA0036S0002	BGI_novel_G002185	CCA0462S0002	CCA0462S0003
CCA0500S0182	CCA0500S0028	CCA0502S0136	BGI_novel_G002649	CCA0203S0003	CCA0196S0002	CCA0507S0318	CCA0507S0173	CCA0039S0010	BGI_novel_G002204	CCA0477S0001	CCA0468S0001
CCA0500S0203	CCA0500S0032	CCA0502S0144	BGI_novel_G002657	CCA0215S0003	CCA0197S0001	CCA0507S0335	CCA0507S0178	CCA0041S0007	BGI_novel_G002210	CCA0500S0046	CCA0500S0043
CCA0500S0211	CCA0500S0033	CCA0502S0158	BGI_novel_G002658	CCA0215S0004	CCA0202S0001	CCA0510S0021	CCA0507S0194	CCA0063S0010	BGI_novel_G002212	CCA0500S0075	CCA0500S0060
CCA0500S0227	CCA0500S0041	CCA0502S0161	BGI_novel_G002667	CCA0215S0005	CCA0208S0005	CCA0510S0025	CCA0507S0217	CCA0065S0007	BGI_novel_G002214	CCA0500S0078	CCA0500S0180
CCA0500S0245	CCA0500S0053	CCA0502S0176	BGI_novel_G002675	CCA0240S0003	CCA0216S0001	CCA0510S0099	CCA0507S0220	CCA0065S0009	BGI_novel_G002221	CCA0500S0097	CCA0500S0183
CCA0500S0246	CCA0500S0055	CCA0502S0178	BGI_novel_G002684	CCA0243S0001	CCA0216S0002	CCA0510S0139	CCA0507S0233	CCA0069S0012	BGI_novel_G002223	CCA0500S0098	CCA0500S0213
CCA0500S0322	CCA0500S0070	CCA0505S0022	BGI_novel_G002689	CCA0243S0002	CCA0258S0001	CCA0510S0150	CCA0507S0234	CCA0070S0001	BGI_novel_G002238	CCA0500S0118	CCA0500S0226
CCA0502S0005	CCA0500S0100	CCA0505S0024	BGI_novel_G002695	CCA0247S0001	CCA0259S0003	CCA0510S0170	CCA0507S0258	CCA0089S0001	BGI_novel_G002245	CCA0500S0152	CCA0500S0236
CCA0502S0014	CCA0500S0103	CCA0505S0037	BGI_novel_G002704	CCA0256S0001	CCA0282S0003	CCA0513S0030	CCA0507S0259	CCA0090S0017	BGI_novel_G002246	CCA0500S0167	CCA0500S0259
CCA0502S0037	CCA0500S0141	CCA0505S0043	BGI_novel_G002708	CCA0262S0001	CCA0335S0002	CCA0513S0038	CCA0510S0012	CCA0090S0018	BGI_novel_G002250	CCA0500S0169	CCA0500S0269
CCA0502S0072	CCA0500S0147	CCA0505S0057	BGI_novel_G002727	CCA0264S0004	CCA0337S0001	CCA0513S0051	CCA0510S0066	CCA0091S0004	BGI_novel_G002251	CCA0500S0172	CCA0500S0288
CCA0502S0113	CCA0500S0191	CCA0505S0065	BGI_novel_G002739	CCA0268S0001	CCA0341S0001	CCA0513S0074	CCA0510S0068	CCA0094S0002	BGI_novel_G002252	CCA0500S0188	CCA0500S0308
CCA0502S0166	CCA0500S0217	CCA0505S0085	BGI_novel_G002744	CCA0271S0001	CCA0345S0001	CCA0513S0088	CCA0510S0086	CCA0095S0008	BGI_novel_G002254	CCA0500S0218	CCA0502S0036
CCA0502S0190	CCA0500S0221	CCA0505S0098	BGI_novel_G002746	CCA0276S0001	CCA0373S0001	CCA0513S0100	CCA0510S0091	CCA0104S0002	BGI_novel_G002259	CCA0500S0254	CCA0502S0079
CCA0505S0032	CCA0500S0234	CCA0505S0112	BGI_novel_G002749	CCA0282S0001	CCA0373S0002	CCA0513S0141	CCA0510S0138	CCA0106S0004	BGI_novel_G002260	CCA0500S0261	CCA0502S0118
CCA0505S0042	CCA0500S0237	CCA0505S0117	BGI_novel_G002781	CCA0286S0002	CCA0390S0002	CCA0513S0143	CCA0510S0156	CCA0108S0006	BGI_novel_G002267	CCA0500S0262	CCA0502S0142
CCA0505S0054	CCA0500S0242	CCA0505S0118	BGI_novel_G002797	CCA0308S0001	CCA0400S0001	CCA0513S0145	CCA0510S0158	CCA0108S0013	BGI_novel_G002270	CCA0500S0281	CCA0502S0157
CCA0505S0058	CCA0500S0279	CCA0505S0121	BGI_novel_G002803	CCA0310S0004	CCA0403S0017	CCA0513S0158	CCA0510S0169	CCA0108S0014	BGI_novel_G002271	CCA0500S0331	CCA0505S0033
CCA0505S0060	CCA0500S0282	CCA0505S0127	BGI_novel_G002807	CCA0314S0001	CCA0403S0021	CCA0513S0162	CCA0510S0172	CCA0108S0029	BGI_novel_G002275	CCA0500S0347	CCA0505S0036
CCA0505S0082	CCA0500S0284	CCA0505S0128	BGI_novel_G002821	CCA0321S0001	CCA0413S0003	CCA0513S0240	CCA0510S0173	CCA0117S0001	BGI_novel_G002288	CCA0502S0013	CCA0505S0040
CCA0505S0083	CCA0500S0290	CCA0505S0164	BGI_novel_G002832	CCA0325S0001	CCA0420S0009	CCA0513S0248	CCA0513S0016	CCA0133S0007	BGI_novel_G002290	CCA0502S0034	CCA0505S0119
CCA0505S0086	CCA0500S0358	CCA0505S0189	BGI_novel_G002873	CCA0326S0001	CCA0431S0006	CCA0513S0257	CCA0513S0022	CCA0133S0008	BGI_novel_G002302	CCA0502S0035	CCA0505S0167
CCA0505S0097	CCA0502S0088	CCA0505S0199	BGI_novel_G002874	CCA0351S0001	CCA0436S0001	CCA0513S0259	CCA0513S0042	CCA0138S0006	BGI_novel_G002321	CCA0502S0039	CCA0505S0270
CCA0505S0214	CCA0502S0129	CCA0505S0209	BGI_novel_G002875	CCA0365S0001	CCA0448S0001	CCA0513S0279	CCA0513S0043	CCA0142S0005	BGI_novel_G002322	CCA0502S0140	CCA0505S0280
CCA0505S0215	CCA0502S0133	CCA0505S0219	BGI_novel_G002881	CCA0370S0001	CCA0465S0001	CCA0513S0292	CCA0513S0060	CCA0183S0022	BGI_novel_G002330	CCA0502S0148	CCA0505S0281
CCA0505S0227	CCA0502S0151	CCA0505S0230	BGI_novel_G002883	CCA0403S0001	CCA0480S0001	CCA0513S0296	CCA0513S0078	CCA0222S0003	BGI_novel_G002346	CCA0502S0154	CCA0505S0290
CCA0505S0235	CCA0502S0156	CCA0505S0234	BGI_novel_G002884	CCA0403S0002	CCA0485S0001	CCA0513S0310	CCA0513S0134	CCA0227S0001	BGI_novel_G002351	CCA0502S0159	CCA0505S0316
CCA0505S0241	CCA0505S0029	CCA0505S0237	BGI_novel_G002914	CCA0403S0008	CCA0493S0001	CCA0513S0319	CCA0513S0196	CCA0231S0001	BGI_novel_G002357	CCA0502S0170	CCA0507S0098
CCA0505S0242	CCA0505S0056	CCA0505S0238	BGI_novel_G002933	CCA0403S0009	CCA0495S0005	CCA0514S0064	CCA0513S0233	CCA0237S0001	BGI_novel_G002365	CCA0502S0182	CCA0507S0107
CCA0505S0243	CCA0505S0081	CCA0505S0240	CCA0001S0009	CCA0403S0013	CCA0500S0019	CCA0514S0079	CCA0513S0239	CCA0244S0001	BGI_novel_G002366	CCA0502S0184	CCA0507S0108
CCA0505S0320	CCA0505S0123	CCA0505S0256	CCA0001S0010	CCA0403S0016	CCA0500S0049	CCA0514S0087	CCA0513S0263	CCA0259S0001	BGI_novel_G002378	CCA0502S0189	CCA0507S0112
CCA0505S0347	CCA0505S0138	CCA0505S0259	CCA0001S0013	CCA0413S0001	CCA0500S0059	CCA0514S0106	CCA0514S0023	CCA0275S0001	BGI_novel_G002388	CCA0505S0021	CCA0507S0117
CCA0505S0350	CCA0505S0223	CCA0505S0261	CCA0001S0018	CCA0416S0004	CCA0500S0065	CCA0514S0130	CCA0514S0024	CCA0282S0002	BGI_novel_G002403	CCA0505S0039	CCA0507S0134
CCA0507S0040	CCA0505S0228	CCA0505S0341	CCA0002S0004	CCA0419S0001	CCA0500S0066	CCA0514S0153	CCA0514S0034	CCA0294S0001	BGI_novel_G002408	CCA0505S0048	CCA0507S0144
CCA0507S0050	CCA0505S0271	CCA0505S0342	CCA0003S0002	CCA0500S0036	CCA0500S0074	CCA0514S0161	CCA0514S0036	CCA0298S0001	BGI_novel_G002415	CCA0505S0076	CCA0507S0152
CCA0507S0053	CCA0505S0345	CCA0505S0355	CCA0009S0004	CCA0500S0050	CCA0500S0094	CCA0514S0183	CCA0514S0046	CCA0307S0001	BGI_novel_G002437	CCA0505S0078	CCA0507S0155
CCA0507S0060	CCA0505S0359	CCA0507S0007	CCA0014S0013	CCA0500S0061	CCA0500S0117	CCA0514S0195	CCA0514S0057	CCA0307S0003	BGI_novel_G002445	CCA0505S0095	CCA0507S0166
CCA0507S0140	CCA0507S0019	CCA0507S0033	CCA0014S0015	CCA0500S0071	CCA0500S0127	CCA0514S0280	CCA0514S0084	CCA0307S0004	BGI_novel_G002453	CCA0505S0101	CCA0507S0175
CCA0507S0141	CCA0507S0024	CCA0507S0075	CCA0018S0004	CCA0500S0086	CCA0500S0140	CCA0514S0284	CCA0514S0099	CCA0310S0001	BGI_novel_G002459	CCA0505S0111	CCA0507S0190
CCA0507S0169	CCA0507S0036	CCA0507S0082	CCA0023S0004	CCA0500S0106	CCA0500S0146	CCA0514S0288	CCA0514S0104	CCA0317S0001	BGI_novel_G002462	CCA0505S0124	CCA0507S0195
CCA0507S0170	CCA0507S0039	CCA0507S0094	CCA0023S0012	CCA0500S0107	CCA0500S0159	CCA0514S0291	CCA0514S0176	CCA0357S0001	BGI_novel_G002463	CCA0505S0126	CCA0507S0225
CCA0507S0193	CCA0507S0046	CCA0507S0115	CCA0039S0001	CCA0500S0113	CCA0500S0163	CCA0516S0011	CCA0514S0221	CCA0358S0001	BGI_novel_G002464	CCA0505S0129	CCA0507S0236
CCA0507S0207	CCA0507S0080	CCA0507S0118	CCA0039S0003	CCA0500S0171	CCA0500S0186	CCA0516S0020	CCA0514S0234	CCA0360S0001	BGI_novel_G002480	CCA0505S0134	CCA0507S0238
CCA0507S0212	CCA0507S0106	CCA0507S0154	CCA0040S0001	CCA0500S0174	CCA0500S0189	CCA0516S0061	CCA0514S0244	CCA0375S0002	BGI_novel_G002485	CCA0505S0148	CCA0507S0292
CCA0507S0213	CCA0507S0109	CCA0507S0163	CCA0041S0006	CCA0500S0185	CCA0500S0231	CCA0516S0141	CCA0514S0289	CCA0402S0001	BGI_novel_G002498	CCA0505S0151	CCA0507S0303
CCA0507S0247	CCA0507S0128	CCA0507S0164	CCA0042S0003	CCA0500S0197	CCA0500S0240	CCA0520S0001	CCA0516S0066	CCA0408S0003	BGI_novel_G002499	CCA0505S0177	CCA0507S0312
CCA0507S0260	CCA0507S0146	CCA0507S0179	CCA0046S0003	CCA0500S0202	CCA0500S0273	CCA0520S0014	CCA0516S0073	CCA0420S0010	BGI_novel_G002505	CCA0505S0202	CCA0507S0322
CCA0507S0262	CCA0507S0174	CCA0507S0180	CCA0051S0009	CCA0500S0204	CCA0500S0302	CCA0520S0016	CCA0516S0075	CCA0421S0004	BGI_novel_G002514	CCA0505S0233	CCA0507S0324
CCA0507S0273	CCA0507S0186	CCA0507S0215	CCA0052S0006	CCA0500S0216	CCA0500S0350	CCA0520S0046	CCA0516S0125	CCA0430S0001	BGI_novel_G002522	CCA0505S0266	CCA0507S0326
CCA0507S0308	CCA0507S0200	CCA0507S0224	CCA0053S0005	CCA0500S0219	CCA0500S0363	CCA0520S0096	CCA0516S0131	CCA0431S0003	BGI_novel_G002526	CCA0505S0268	CCA0510S0002
CCA0510S0045	CCA0507S0230	CCA0507S0246	CCA0053S0006	CCA0500S0228	CCA0502S0043	CCA0520S0107	CCA0520S0027	CCA0431S0004	BGI_novel_G002551	CCA0505S0272	CCA0510S0013
CCA0510S0060	CCA0507S0279	CCA0507S0274	CCA0053S0007	CCA0500S0229	CCA0502S0048	CCA0520S0113	CCA0520S0033	CCA0443S0001	BGI_novel_G002561	CCA0505S0273	CCA0510S0015
CCA0510S0069	CCA0507S0297	CCA0507S0284	CCA0057S0001	CCA0500S0232	CCA0502S0054	CCA0520S0123	CCA0520S0037	CCA0447S0001	BGI_novel_G002568	CCA0505S0283	CCA0510S0026
CCA0510S0096	CCA0507S0302	CCA0507S0290	CCA0057S0005	CCA0500S0233	CCA0502S0058	CCA0520S0154	CCA0520S0047	CCA0456S0003	BGI_novel_G002570	CCA0505S0284	CCA0510S0048
CCA0510S0105	CCA0510S0014	CCA0510S0011	CCA0067S0001	CCA0500S0243	CCA0502S0096	CCA0520S0167	CCA0520S0072	CCA0474S0001	BGI_novel_G002604	CCA0505S0287	CCA0510S0061
CCA0510S0107	CCA0510S0065	CCA0510S0072	CCA0069S0006	CCA0500S0253	CCA0502S0121	CCA0520S0237	CCA0520S0077	CCA0481S0001	BGI_novel_G002607	CCA0505S0302	CCA0510S0062
CCA0510S0118	CCA0510S0071	CCA0510S0074	CCA0072S0002	CCA0500S0289	CCA0502S0122	CCA0520S0254	CCA0520S0078	CCA0500S0095	BGI_novel_G002615	CCA0505S0305	CCA0510S0116
CCA0510S0159	CCA0510S0083	CCA0510S0075	CCA0073S0002	CCA0500S0295	CCA0502S0160	CCA0522S0017	CCA0520S0081	CCA0500S0116	BGI_novel_G002627	CCA0505S0323	CCA0510S0119
CCA0513S0010	CCA0510S0142	CCA0510S0097	CCA0082S0019	CCA0500S0299	CCA0502S0165	CCA0522S0020	CCA0520S0083	CCA0500S0151	BGI_novel_G002631	CCA0505S0326	CCA0510S0125
CCA0513S0015	CCA0513S0025	CCA0510S0112	CCA0086S0009	CCA0500S0306	CCA0502S0168	CCA0522S0042	CCA0520S0088	CCA0500S0205	BGI_novel_G002655	CCA0505S0328	CCA0510S0174
CCA0513S0020	CCA0513S0031	CCA0510S0129	CCA0086S0011	CCA0500S0310	CCA0502S0200	CCA0522S0050	CCA0520S0115	CCA0500S0207	BGI_novel_G002668	CCA0505S0332	CCA0510S0177
CCA0513S0034	CCA0513S0046	CCA0510S0135	CCA0086S0012	CCA0500S0354	CCA0505S0064	CCA0522S0090	CCA0520S0133	CCA0500S0208	BGI_novel_G002671	CCA0505S0349	CCA0513S0013
CCA0513S0057	CCA0513S0091	CCA0510S0168	CCA0086S0014	CCA0502S0010	CCA0505S0072	CCA0522S0115	CCA0520S0134	CCA0500S0215	BGI_novel_G002677	CCA0505S0357	CCA0513S0045
CCA0513S0058	CCA0513S0097	CCA0510S0175	CCA0090S0004	CCA0502S0027	CCA0505S0073	CCA0522S0126	CCA0520S0135	CCA0500S0238	BGI_novel_G002680	CCA0507S0005	CCA0513S0053
CCA0513S0059	CCA0513S0116	CCA0510S0182	CCA0092S0001	CCA0502S0055	CCA0505S0075	CCA0522S0180	CCA0520S0136	CCA0500S0271	BGI_novel_G002702	CCA0507S0006	CCA0513S0077
CCA0513S0065	CCA0513S0179	CCA0512S0001	CCA0108S0004	CCA0502S0059	CCA0505S0084	CCA0522S0189	CCA0520S0164	CCA0500S0283	BGI_novel_G002716	CCA0507S0049	CCA0513S0106
CCA0513S0071	CCA0513S0237	CCA0513S0017	CCA0108S0007	CCA0502S0085	CCA0505S0090	CCA0522S0211	CCA0520S0177	CCA0500S0292	BGI_novel_G002723	CCA0507S0066	CCA0513S0113
CCA0513S0079	CCA0513S0271	CCA0513S0018	CCA0108S0011	CCA0502S0128	CCA0505S0104	CCA0522S0216	CCA0520S0203	CCA0500S0294	BGI_novel_G002729	CCA0507S0084	CCA0513S0119
CCA0513S0118	CCA0513S0284	CCA0513S0019	CCA0108S0026	CCA0502S0134	CCA0505S0145	CCA0522S0235	CCA0520S0204	CCA0500S0344	BGI_novel_G002730	CCA0507S0086	CCA0513S0160
CCA0513S0132	CCA0513S0306	CCA0513S0021	CCA0110S0002	CCA0502S0145	CCA0505S0174	CCA0522S0252	CCA0520S0213	CCA0505S0027	BGI_novel_G002762	CCA0507S0089	CCA0513S0174
CCA0513S0136	CCA0513S0325	CCA0513S0028	CCA0121S0001	CCA0502S0147	CCA0505S0204	CCA0522S0267	CCA0520S0251	CCA0505S0050	BGI_novel_G002765	CCA0507S0090	CCA0513S0176
CCA0513S0152	CCA0514S0007	CCA0513S0040	CCA0122S0001	CCA0502S0149	CCA0505S0208	CCA0522S0283	CCA0520S0252	CCA0505S0099	BGI_novel_G002766	CCA0507S0100	CCA0513S0181
CCA0513S0171	CCA0514S0009	CCA0513S0055	CCA0132S0002	CCA0502S0152	CCA0505S0277	CCA0522S0284	CCA0520S0256	CCA0505S0113	BGI_novel_G002770	CCA0507S0101	CCA0513S0247
CCA0513S0200	CCA0514S0010	CCA0513S0063	CCA0133S0009	CCA0502S0177	CCA0505S0278	CCA0524S0018	CCA0522S0039	CCA0505S0146	BGI_novel_G002771	CCA0507S0127	CCA0513S0268
CCA0513S0213	CCA0514S0052	CCA0513S0122	CCA0139S0001	CCA0505S0023	CCA0505S0279	CCA0524S0048	CCA0522S0047	CCA0505S0154	BGI_novel_G002782	CCA0507S0132	CCA0513S0270
CCA0513S0227	CCA0514S0142	CCA0513S0130	CCA0147S0006	CCA0505S0028	CCA0505S0300	CCA0524S0064	CCA0522S0055	CCA0505S0169	BGI_novel_G002816	CCA0507S0136	CCA0513S0290
CCA0513S0231	CCA0514S0144	CCA0513S0138	CCA0147S0010	CCA0505S0049	CCA0505S0303	CCA0524S0090	CCA0522S0060	CCA0505S0203	BGI_novel_G002825	CCA0507S0167	CCA0513S0327
CCA0513S0291	CCA0514S0169	CCA0513S0144	CCA0147S0011	CCA0505S0051	CCA0505S0314	CCA0524S0113	CCA0522S0079	CCA0505S0207	BGI_novel_G002827	CCA0507S0201	CCA0514S0013
CCA0513S0301	CCA0514S0181	CCA0513S0147	CCA0149S0002	CCA0505S0068	CCA0505S0334	CCA0524S0116	CCA0522S0084	CCA0505S0211	BGI_novel_G002828	CCA0507S0221	CCA0514S0050
CCA0513S0315	CCA0514S0186	CCA0513S0151	CCA0149S0003	CCA0505S0077	CCA0507S0003	CCA0524S0154	CCA0522S0103	CCA0505S0212	BGI_novel_G002836	CCA0507S0222	CCA0514S0059
CCA0513S0321	CCA0514S0198	CCA0513S0159	CCA0157S0001	CCA0505S0100	CCA0507S0069	CCA0524S0187	CCA0522S0139	CCA0505S0247	BGI_novel_G002837	CCA0507S0228	CCA0514S0129
CCA0513S0334	CCA0514S0206	CCA0513S0168	CCA0163S0002	CCA0505S0105	CCA0507S0091	CCA0524S0197	CCA0522S0162	CCA0505S0248	BGI_novel_G002842	CCA0507S0229	CCA0514S0139
CCA0513S0339	CCA0514S0215	CCA0513S0172	CCA0175S0001	CCA0505S0116	CCA0507S0126	CCA0524S0212	CCA0522S0233	CCA0505S0307	BGI_novel_G002844	CCA0507S0231	CCA0514S0155
CCA0513S0345	CCA0514S0251	CCA0513S0188	CCA0179S0002	CCA0505S0139	CCA0507S0139	CCA0524S0234	CCA0522S0236	CCA0505S0322	BGI_novel_G002855	CCA0507S0301	CCA0514S0166
CCA0513S0349	CCA0514S0253	CCA0513S0189	CCA0179S0003	CCA0505S0160	CCA0507S0172	CCA0524S0244	CCA0522S0243	CCA0505S0356	BGI_novel_G002864	CCA0507S0309	CCA0514S0192
CCA0513S0353	CCA0514S0268	CCA0513S0190	CCA0183S0006	CCA0505S0171	CCA0507S0185	CCA0524S0263	CCA0522S0250	CCA0507S0001	BGI_novel_G002865	CCA0507S0310	CCA0514S0212
CCA0513S0356	CCA0514S0269	CCA0513S0197	CCA0189S0003	CCA0505S0187	CCA0507S0199	CCA0524S0267	CCA0522S0256	CCA0507S0002	BGI_novel_G002866	CCA0510S0090	CCA0514S0229
CCA0514S0012	CCA0516S0062	CCA0513S0207	CCA0191S0001	CCA0505S0201	CCA0507S0214	CCA0524S0281	CCA0524S0008	CCA0507S0013	BGI_novel_G002867	CCA0510S0109	CCA0514S0245
CCA0514S0032	CCA0516S0063	CCA0513S0222	CCA0195S0005	CCA0505S0226	CCA0507S0216	CCA0524S0305	CCA0524S0024	CCA0507S0026	BGI_novel_G002868	CCA0510S0126	CCA0516S0059
CCA0514S0041	CCA0516S0084	CCA0513S0253	CCA0204S0001	CCA0505S0229	CCA0507S0226	CCA0524S0326	CCA0524S0042	CCA0507S0078	BGI_novel_G002869	CCA0510S0136	CCA0516S0064
CCA0514S0080	CCA0516S0111	CCA0513S0255	CCA0234S0002	CCA0505S0236	CCA0507S0239	CCA0524S0358	CCA0524S0045	CCA0507S0120	BGI_novel_G002885	CCA0510S0145	CCA0516S0070
CCA0514S0086	CCA0520S0019	CCA0513S0261	CCA0253S0001	CCA0505S0253	CCA0507S0240	CCA0524S0368	CCA0524S0052	CCA0507S0165	BGI_novel_G002894	CCA0510S0163	CCA0516S0076
CCA0514S0100	CCA0520S0049	CCA0513S0262	CCA0260S0001	CCA0505S0254	CCA0507S0255	CCA0525S0031	CCA0524S0055	CCA0507S0197	BGI_novel_G002895	CCA0513S0006	CCA0516S0078
CCA0514S0114	CCA0520S0108	CCA0513S0278	CCA0269S0001	CCA0505S0257	CCA0507S0261	CCA0525S0058	CCA0524S0057	CCA0507S0205	BGI_novel_G002901	CCA0513S0009	CCA0516S0102
CCA0514S0115	CCA0520S0114	CCA0513S0303	CCA0278S0004	CCA0505S0260	CCA0507S0282	CCA0525S0062	CCA0524S0089	CCA0507S0235	BGI_novel_G002907	CCA0513S0026	CCA0516S0106
CCA0514S0135	CCA0520S0117	CCA0513S0307	CCA0281S0003	CCA0505S0263	CCA0507S0307	CCA0525S0077	CCA0524S0104	CCA0507S0263	BGI_novel_G002909	CCA0513S0056	CCA0520S0015
CCA0514S0159	CCA0520S0146	CCA0513S0311	CCA0292S0003	CCA0505S0267	CCA0507S0313	CCA0525S0080	CCA0524S0105	CCA0507S0286	BGI_novel_G002910	CCA0513S0061	CCA0520S0023
CCA0514S0162	CCA0520S0155	CCA0513S0320	CCA0303S0003	CCA0505S0299	CCA0510S0017	CCA0525S0107	CCA0524S0144	CCA0507S0291	BGI_novel_G002917	CCA0513S0069	CCA0520S0038
CCA0514S0175	CCA0520S0195	CCA0513S0322	CCA0346S0001	CCA0505S0304	CCA0510S0030	CCA0525S0113	CCA0524S0186	CCA0507S0293	BGI_novel_G002923	CCA0513S0089	CCA0520S0067
CCA0514S0211	CCA0520S0210	CCA0513S0324	CCA0350S0002	CCA0505S0308	CCA0510S0063	CCA0525S0120	CCA0524S0188	CCA0507S0294	BGI_novel_G002926	CCA0513S0098	CCA0520S0105
CCA0514S0237	CCA0520S0215	CCA0513S0331	CCA0366S0001	CCA0505S0311	CCA0510S0104	CCA0525S0142	CCA0524S0215	CCA0507S0316	BGI_novel_G002932	CCA0513S0099	CCA0520S0112
CCA0514S0241	CCA0520S0216	CCA0514S0058	CCA0376S0001	CCA0505S0312	CCA0510S0148	CCA0525S0149	CCA0524S0219	CCA0507S0321	CCA0001S0004	CCA0513S0107	CCA0520S0139
CCA0514S0252	CCA0520S0262	CCA0514S0092	CCA0388S0001	CCA0505S0331	CCA0510S0184	CCA0525S0153	CCA0524S0235	CCA0510S0041	CCA0001S0036	CCA0513S0112	CCA0520S0149
CCA0514S0286	CCA0520S0274	CCA0514S0095	CCA0391S0002	CCA0507S0011	CCA0513S0001	CCA0525S0156	CCA0524S0246	CCA0510S0114	CCA0006S0006	CCA0513S0135	CCA0520S0169
CCA0516S0008	CCA0522S0007	CCA0514S0140	CCA0403S0011	CCA0507S0015	CCA0513S0005	CCA0525S0164	CCA0524S0257	CCA0510S0134	CCA0007S0005	CCA0513S0150	CCA0520S0189
CCA0516S0018	CCA0522S0021	CCA0514S0145	CCA0410S0001	CCA0507S0027	CCA0513S0011	CCA0525S0165	CCA0524S0265	CCA0510S0162	CCA0008S0001	CCA0513S0155	CCA0520S0194
CCA0516S0036	CCA0522S0023	CCA0514S0150	CCA0417S0001	CCA0507S0035	CCA0513S0041	CCA0525S0167	CCA0524S0270	CCA0513S0029	CCA0009S0009	CCA0513S0161	CCA0520S0220
CCA0516S0065	CCA0522S0024	CCA0514S0160	CCA0420S0005	CCA0507S0057	CCA0513S0062	CCA0525S0181	CCA0524S0275	CCA0513S0084	CCA0010S0001	CCA0513S0184	CCA0520S0231
CCA0516S0127	CCA0522S0035	CCA0514S0164	CCA0420S0008	CCA0507S0059	CCA0513S0076	CCA0525S0186	CCA0524S0298	CCA0513S0127	CCA0010S0002	CCA0513S0195	CCA0520S0248
CCA0519S0001	CCA0522S0036	CCA0514S0188	CCA0425S0001	CCA0507S0063	CCA0513S0086	CCA0525S0194	CCA0524S0324	CCA0513S0149	CCA0013S0004	CCA0513S0204	CCA0522S0108
CCA0520S0012	CCA0522S0038	CCA0514S0202	CCA0426S0001	CCA0507S0067	CCA0513S0105	CCA0525S0210	CCA0524S0325	CCA0513S0228	CCA0014S0002	CCA0513S0205	CCA0522S0134
CCA0520S0020	CCA0522S0040	CCA0514S0216	CCA0426S0002	CCA0507S0068	CCA0513S0114	CCA0526S0029	CCA0524S0329	CCA0513S0230	CCA0014S0031	CCA0513S0212	CCA0522S0136
CCA0520S0022	CCA0522S0066	CCA0514S0223	CCA0449S0004	CCA0507S0070	CCA0513S0164	CCA0526S0037	CCA0524S0355	CCA0513S0238	CCA0025S0002	CCA0513S0217	CCA0522S0137
CCA0520S0024	CCA0522S0097	CCA0514S0228	CCA0476S0002	CCA0507S0088	CCA0513S0170	CCA0526S0049	CCA0524S0359	CCA0513S0243	CCA0029S0004	CCA0513S0234	CCA0522S0140
CCA0520S0031	CCA0522S0147	CCA0514S0233	CCA0478S0001	CCA0507S0121	CCA0513S0180	CCA0526S0058	CCA0524S0372	CCA0513S0275	CCA0034S0001	CCA0513S0235	CCA0522S0143
CCA0520S0073	CCA0522S0160	CCA0514S0235	CCA0481S0003	CCA0507S0124	CCA0513S0215	CCA0526S0076	CCA0525S0011	CCA0513S0295	CCA0038S0003	CCA0513S0236	CCA0522S0151
CCA0520S0079	CCA0522S0161	CCA0514S0236	CCA0490S0001	CCA0507S0130	CCA0513S0242	CCA0526S0089	CCA0525S0025	CCA0513S0314	CCA0039S0014	CCA0513S0277	CCA0522S0199
CCA0520S0097	CCA0522S0213	CCA0514S0242	CCA0494S0002	CCA0507S0131	CCA0513S0252	CCA0526S0097	CCA0525S0029	CCA0513S0350	CCA0039S0018	CCA0513S0280	CCA0522S0228
CCA0520S0120	CCA0522S0221	CCA0514S0267	CCA0500S0031	CCA0507S0142	CCA0513S0254	CCA0526S0098	CCA0525S0033	CCA0514S0056	CCA0039S0019	CCA0513S0300	CCA0522S0238
CCA0520S0130	CCA0522S0224	CCA0516S0007	CCA0500S0044	CCA0507S0149	CCA0513S0258	CCA0526S0099	CCA0525S0040	CCA0514S0123	CCA0046S0002	CCA0513S0304	CCA0522S0239
CCA0520S0132	CCA0522S0265	CCA0516S0069	CCA0500S0051	CCA0507S0162	CCA0513S0285	CCA0526S0119	CCA0525S0046	CCA0514S0158	CCA0048S0001	CCA0514S0006	CCA0524S0003
CCA0520S0178	CCA0522S0275	CCA0516S0074	CCA0500S0069	CCA0507S0177	CCA0513S0313	CCA0526S0157	CCA0525S0130	CCA0514S0173	CCA0048S0003	CCA0514S0054	CCA0524S0005
CCA0520S0180	CCA0522S0281	CCA0516S0114	CCA0500S0085	CCA0507S0203	CCA0513S0316	CCA0526S0190	CCA0525S0131	CCA0514S0185	CCA0048S0007	CCA0514S0096	CCA0524S0017
CCA0520S0186	CCA0524S0041	CCA0516S0126	CCA0500S0092	CCA0507S0209	CCA0513S0317	CCA0526S0200	CCA0525S0143	CCA0514S0205	CCA0048S0009	CCA0514S0098	CCA0524S0025
CCA0520S0199	CCA0524S0203	CCA0516S0135	CCA0500S0104	CCA0507S0218	CCA0513S0330	CCA0526S0204	CCA0525S0146	CCA0514S0214	CCA0049S0003	CCA0514S0108	CCA0524S0047
CCA0520S0200	CCA0524S0216	CCA0516S0140	CCA0500S0114	CCA0507S0270	CCA0513S0342	CCA0526S0205	CCA0525S0147	CCA0514S0270	CCA0049S0004	CCA0514S0110	CCA0524S0050
CCA0520S0202	CCA0524S0241	CCA0520S0030	CCA0500S0121	CCA0507S0287	CCA0513S0348	CCA0526S0213	CCA0525S0162	CCA0516S0091	CCA0052S0004	CCA0514S0133	CCA0524S0067
CCA0520S0217	CCA0524S0242	CCA0520S0043	CCA0500S0123	CCA0507S0306	CCA0513S0352	CCA0526S0215	CCA0525S0203	CCA0516S0142	CCA0059S0007	CCA0514S0157	CCA0524S0127
CCA0520S0222	CCA0524S0271	CCA0520S0048	CCA0500S0129	CCA0507S0323	CCA0513S0358	CCA0526S0216	CCA0525S0209	CCA0516S0144	CCA0060S0001	CCA0514S0184	CCA0524S0133
CCA0520S0227	CCA0524S0272	CCA0520S0053	CCA0500S0135	CCA0507S0325	CCA0514S0103	CCA0526S0237	CCA0525S0217	CCA0520S0004	CCA0065S0004	CCA0514S0189	CCA0524S0134
CCA0520S0240	CCA0524S0274	CCA0520S0058	CCA0500S0154	CCA0510S0023	CCA0514S0127	CCA0526S0239	CCA0526S0008	CCA0520S0042	CCA0069S0003	CCA0514S0200	CCA0524S0135
CCA0520S0260	CCA0524S0296	CCA0520S0062	CCA0500S0155	CCA0510S0042	CCA0514S0131	CCA0526S0270	CCA0526S0026	CCA0520S0098	CCA0070S0002	CCA0514S0218	CCA0524S0176
CCA0520S0271	CCA0524S0297	CCA0520S0063	CCA0500S0156	CCA0510S0084	CCA0514S0143	CCA0526S0276	CCA0526S0028	CCA0520S0131	CCA0075S0001	CCA0514S0220	CCA0524S0178
CCA0522S0031	CCA0524S0316	CCA0520S0065	CCA0500S0157	CCA0510S0089	CCA0514S0147	CCA0526S0295	CCA0526S0039	CCA0520S0142	CCA0076S0002	CCA0514S0225	CCA0524S0199
CCA0522S0052	CCA0524S0320	CCA0520S0071	CCA0500S0184	CCA0510S0092	CCA0514S0149	CCA0526S0309	CCA0526S0051	CCA0520S0147	CCA0081S0003	CCA0514S0232	CCA0524S0214
CCA0522S0054	CCA0524S0346	CCA0520S0086	CCA0500S0224	CCA0510S0101	CCA0514S0154	CCA0526S0347	CCA0526S0070	CCA0520S0159	CCA0082S0007	CCA0514S0240	CCA0524S0220
CCA0522S0073	CCA0524S0367	CCA0520S0102	CCA0500S0258	CCA0510S0127	CCA0514S0203	CCA0529S0006	CCA0526S0093	CCA0520S0171	CCA0086S0006	CCA0514S0243	CCA0524S0226
CCA0522S0076	CCA0525S0024	CCA0520S0104	CCA0500S0287	CCA0510S0132	CCA0514S0209	CCA0529S0029	CCA0526S0094	CCA0520S0207	CCA0090S0001	CCA0514S0249	CCA0524S0268
CCA0522S0080	CCA0525S0037	CCA0520S0109	CCA0500S0291	CCA0510S0144	CCA0514S0210	CCA0529S0100	CCA0526S0095	CCA0520S0221	CCA0090S0013	CCA0514S0272	CCA0524S0288
CCA0522S0087	CCA0525S0038	CCA0520S0116	CCA0500S0293	CCA0510S0166	CCA0514S0224	CCA0529S0108	CCA0526S0096	CCA0520S0246	CCA0099S0003	CCA0514S0287	CCA0524S0306
CCA0522S0095	CCA0525S0070	CCA0520S0125	CCA0502S0006	CCA0510S0178	CCA0514S0265	CCA0533S0011	CCA0526S0123	CCA0520S0250	CCA0102S0003	CCA0514S0290	CCA0524S0313
CCA0522S0106	CCA0525S0133	CCA0520S0138	CCA0502S0012	CCA0510S0181	CCA0514S0271	CCA0533S0020	CCA0526S0129	CCA0520S0266	CCA0102S0005	CCA0515S0002	CCA0524S0317
CCA0522S0118	CCA0525S0138	CCA0520S0143	CCA0502S0015	CCA0513S0003	CCA0516S0023	CCA0533S0075	CCA0526S0135	CCA0520S0281	CCA0103S0002	CCA0516S0024	CCA0525S0090
CCA0522S0159	CCA0525S0150	CCA0520S0152	CCA0502S0075	CCA0513S0035	CCA0516S0082	CCA0533S0128	CCA0526S0159	CCA0522S0010	CCA0108S0020	CCA0516S0099	CCA0525S0100
CCA0522S0190	CCA0525S0171	CCA0520S0172	CCA0502S0095	CCA0513S0037	CCA0516S0113	CCA0533S0174	CCA0526S0163	CCA0522S0027	CCA0108S0022	CCA0516S0123	CCA0525S0140
CCA0522S0202	CCA0525S0185	CCA0520S0173	CCA0502S0141	CCA0513S0048	CCA0516S0129	CCA0533S0178	CCA0526S0165	CCA0522S0127	CCA0112S0004	CCA0520S0013	CCA0525S0161
CCA0522S0230	CCA0526S0002	CCA0520S0174	CCA0502S0155	CCA0513S0052	CCA0520S0017	CCA0533S0180	CCA0526S0174	CCA0522S0170	CCA0114S0001	CCA0520S0018	CCA0525S0191
CCA0522S0261	CCA0526S0017	CCA0520S0198	CCA0502S0162	CCA0513S0068	CCA0520S0021	CCA0533S0185	CCA0526S0178	CCA0522S0192	CCA0114S0003	CCA0520S0025	CCA0526S0009
CCA0524S0012	CCA0526S0021	CCA0520S0206	CCA0502S0192	CCA0513S0108	CCA0520S0060	CCA0533S0190	CCA0526S0250	CCA0522S0209	CCA0115S0002	CCA0520S0028	CCA0526S0030
CCA0524S0072	CCA0526S0041	CCA0520S0208	CCA0505S0038	CCA0513S0115	CCA0520S0061	CCA0533S0207	CCA0526S0260	CCA0522S0217	CCA0122S0004	CCA0520S0032	CCA0526S0031
CCA0524S0082	CCA0526S0045	CCA0520S0209	CCA0505S0045	CCA0513S0126	CCA0520S0087	CCA0533S0228	CCA0526S0323	CCA0522S0218	CCA0125S0002	CCA0520S0034	CCA0526S0084
CCA0524S0083	CCA0526S0053	CCA0520S0249	CCA0505S0046	CCA0513S0137	CCA0520S0089	CCA0533S0237	CCA0526S0331	CCA0522S0222	CCA0128S0003	CCA0520S0040	CCA0526S0124
CCA0524S0094	CCA0526S0074	CCA0520S0259	CCA0505S0079	CCA0513S0142	CCA0520S0128	CCA0533S0246	CCA0526S0337	CCA0522S0223	CCA0133S0001	CCA0520S0045	CCA0526S0130
CCA0524S0112	CCA0526S0077	CCA0522S0013	CCA0505S0142	CCA0513S0154	CCA0520S0151	CCA0535S0012	CCA0529S0032	CCA0522S0246	CCA0138S0004	CCA0520S0052	CCA0526S0141
CCA0524S0131	CCA0526S0139	CCA0522S0025	CCA0505S0183	CCA0513S0182	CCA0520S0153	CCA0535S0045	CCA0529S0050	CCA0524S0032	CCA0149S0004	CCA0520S0054	CCA0526S0143
CCA0524S0143	CCA0526S0140	CCA0522S0037	CCA0505S0185	CCA0513S0187	CCA0520S0228	CCA0535S0090	CCA0529S0068	CCA0524S0036	CCA0149S0007	CCA0520S0055	CCA0526S0147
CCA0524S0152	CCA0526S0152	CCA0522S0046	CCA0505S0188	CCA0513S0193	CCA0520S0232	CCA0539S0025	CCA0529S0087	CCA0524S0110	CCA0156S0002	CCA0520S0064	CCA0526S0160
CCA0524S0183	CCA0526S0156	CCA0522S0058	CCA0505S0210	CCA0513S0199	CCA0522S0053	CCA0539S0065	CCA0529S0088	CCA0524S0119	CCA0165S0005	CCA0520S0066	CCA0526S0171
CCA0524S0194	CCA0526S0183	CCA0522S0067	CCA0505S0239	CCA0513S0206	CCA0522S0063	CCA0539S0071	CCA0529S0097	CCA0524S0128	CCA0166S0001	CCA0520S0076	CCA0526S0175
CCA0524S0210	CCA0526S0185	CCA0522S0091	CCA0505S0245	CCA0513S0210	CCA0522S0071	CCA0539S0081	CCA0529S0103	CCA0524S0201	CCA0176S0002	CCA0520S0101	CCA0526S0187
CCA0524S0222	CCA0526S0186	CCA0522S0102	CCA0505S0246	CCA0513S0219	CCA0522S0082	CCA0539S0082	CCA0531S0001	CCA0524S0211	CCA0180S0001	CCA0520S0141	CCA0526S0198
CCA0524S0245	CCA0526S0203	CCA0522S0154	CCA0505S0252	CCA0513S0276	CCA0522S0094	CCA0539S0088	CCA0533S0001	CCA0524S0276	CCA0183S0003	CCA0520S0148	CCA0526S0202
CCA0524S0255	CCA0526S0230	CCA0522S0175	CCA0505S0264	CCA0513S0281	CCA0522S0114	CCA0539S0090	CCA0533S0010	CCA0524S0279	CCA0183S0009	CCA0520S0162	CCA0526S0209
CCA0524S0278	CCA0526S0257	CCA0522S0188	CCA0505S0282	CCA0513S0282	CCA0522S0124	CCA0539S0097	CCA0533S0015	CCA0524S0301	CCA0183S0015	CCA0520S0175	CCA0526S0223
CCA0524S0282	CCA0526S0265	CCA0522S0196	CCA0505S0294	CCA0513S0309	CCA0522S0141	CCA0539S0105	CCA0533S0021	CCA0524S0331	CCA0183S0023	CCA0520S0176	CCA0526S0272
CCA0524S0295	CCA0526S0266	CCA0522S0225	CCA0505S0298	CCA0513S0318	CCA0522S0145	CCA0539S0137	CCA0533S0025	CCA0524S0347	CCA0188S0004	CCA0520S0183	CCA0529S0079
CCA0524S0304	CCA0526S0281	CCA0522S0226	CCA0505S0313	CCA0513S0323	CCA0522S0148	CCA0539S0163	CCA0533S0026	CCA0524S0348	CCA0189S0001	CCA0520S0201	CCA0529S0080
CCA0524S0322	CCA0526S0341	CCA0522S0257	CCA0505S0351	CCA0513S0326	CCA0522S0167	CCA0539S0173	CCA0533S0033	CCA0524S0356	CCA0189S0002	CCA0520S0205	CCA0530S0002
CCA0524S0343	CCA0529S0042	CCA0522S0262	CCA0507S0048	CCA0513S0341	CCA0522S0197	CCA0539S0195	CCA0533S0050	CCA0525S0015	CCA0197S0006	CCA0520S0211	CCA0533S0002
CCA0524S0351	CCA0529S0089	CCA0522S0268	CCA0507S0051	CCA0514S0015	CCA0522S0241	CCA0539S0205	CCA0533S0052	CCA0525S0064	CCA0199S0001	CCA0520S0230	CCA0533S0013
CCA0525S0007	CCA0533S0005	CCA0524S0030	CCA0507S0083	CCA0514S0025	CCA0522S0272	CCA0539S0206	CCA0533S0062	CCA0525S0074	CCA0206S0002	CCA0520S0244	CCA0533S0043
CCA0525S0026	CCA0533S0066	CCA0524S0031	CCA0507S0097	CCA0514S0035	CCA0522S0276	CCA0539S0224	CCA0533S0063	CCA0525S0092	CCA0208S0002	CCA0520S0255	CCA0533S0044
CCA0525S0055	CCA0533S0067	CCA0524S0034	CCA0507S0138	CCA0514S0062	CCA0522S0278	CCA0539S0225	CCA0533S0117	CCA0525S0094	CCA0209S0001	CCA0520S0261	CCA0533S0045
CCA0525S0059	CCA0533S0109	CCA0524S0046	CCA0507S0147	CCA0514S0063	CCA0524S0001	CCA0539S0228	CCA0533S0144	CCA0525S0104	CCA0219S0001	CCA0520S0263	CCA0533S0072
CCA0525S0085	CCA0533S0113	CCA0524S0061	CCA0507S0156	CCA0514S0077	CCA0524S0009	CCA0539S0246	CCA0533S0153	CCA0525S0160	CCA0220S0001	CCA0520S0272	CCA0533S0086
CCA0525S0110	CCA0533S0145	CCA0524S0098	CCA0507S0161	CCA0514S0088	CCA0524S0040	CCA0539S0248	CCA0533S0175	CCA0525S0182	CCA0229S0001	CCA0522S0019	CCA0533S0105
CCA0525S0121	CCA0533S0170	CCA0524S0107	CCA0507S0171	CCA0514S0107	CCA0524S0059	CCA0539S0268	CCA0533S0198	CCA0525S0184	CCA0232S0002	CCA0522S0045	CCA0533S0114
CCA0525S0187	CCA0533S0186	CCA0524S0115	CCA0507S0176	CCA0514S0125	CCA0524S0063	CCA0542S0095	CCA0533S0208	CCA0525S0205	CCA0238S0002	CCA0522S0064	CCA0533S0146
CCA0526S0025	CCA0533S0205	CCA0524S0123	CCA0507S0196	CCA0514S0126	CCA0524S0085	CCA0542S0099	CCA0535S0007	CCA0526S0012	CCA0244S0004	CCA0522S0069	CCA0533S0147
CCA0526S0083	CCA0533S0211	CCA0524S0126	CCA0507S0198	CCA0514S0132	CCA0524S0096	CCA0542S0100	CCA0535S0023	CCA0526S0075	CCA0244S0005	CCA0522S0074	CCA0533S0150
CCA0526S0111	CCA0533S0220	CCA0524S0142	CCA0507S0248	CCA0514S0134	CCA0524S0097	CCA0542S0113	CCA0535S0027	CCA0526S0082	CCA0274S0001	CCA0522S0085	CCA0533S0168
CCA0526S0117	CCA0533S0225	CCA0524S0151	CCA0507S0249	CCA0514S0136	CCA0524S0158	CCA0542S0151	CCA0535S0043	CCA0526S0085	CCA0278S0002	CCA0522S0096	CCA0533S0169
CCA0526S0149	CCA0533S0232	CCA0524S0184	CCA0507S0250	CCA0514S0146	CCA0524S0177	CCA0542S0172	CCA0535S0052	CCA0526S0088	CCA0279S0001	CCA0522S0122	CCA0533S0187
CCA0526S0184	CCA0533S0233	CCA0524S0190	CCA0507S0251	CCA0514S0187	CCA0524S0181	CCA0546S0036	CCA0535S0091	CCA0526S0136	CCA0286S0001	CCA0522S0168	CCA0533S0191
CCA0526S0191	CCA0535S0078	CCA0524S0198	CCA0507S0264	CCA0514S0208	CCA0524S0182	CCA0546S0041	CCA0535S0122	CCA0526S0170	CCA0290S0001	CCA0522S0179	CCA0533S0193
CCA0526S0199	CCA0535S0082	CCA0524S0252	CCA0507S0265	CCA0514S0213	CCA0524S0189	CCA0546S0065	CCA0535S0138	CCA0526S0181	CCA0310S0005	CCA0522S0193	CCA0533S0194
CCA0526S0247	CCA0535S0094	CCA0524S0253	CCA0507S0277	CCA0514S0239	CCA0524S0192	CCA0546S0070	CCA0539S0013	CCA0526S0207	CCA0310S0006	CCA0522S0208	CCA0533S0195
CCA0526S0278	CCA0535S0096	CCA0524S0266	CCA0507S0295	CCA0514S0274	CCA0524S0213	CCA0546S0072	CCA0539S0037	CCA0526S0210	CCA0323S0002	CCA0522S0214	CCA0533S0202
CCA0526S0284	CCA0535S0101	CCA0524S0269	CCA0507S0311	CCA0514S0281	CCA0524S0223	CCA0546S0079	CCA0539S0038	CCA0526S0212	CCA0335S0003	CCA0522S0231	CCA0533S0222
CCA0526S0298	CCA0535S0135	CCA0524S0310	CCA0508S0001	CCA0514S0282	CCA0524S0224	CCA0546S0088	CCA0539S0046	CCA0526S0227	CCA0367S0001	CCA0522S0234	CCA0533S0223
CCA0526S0302	CCA0539S0007	CCA0524S0312	CCA0510S0044	CCA0514S0283	CCA0524S0225	CCA0546S0105	CCA0539S0047	CCA0526S0238	CCA0373S0003	CCA0522S0263	CCA0535S0048
CCA0526S0314	CCA0539S0024	CCA0524S0321	CCA0510S0047	CCA0516S0010	CCA0524S0227	CCA0546S0107	CCA0539S0063	CCA0526S0242	CCA0374S0002	CCA0522S0274	CCA0535S0049
CCA0526S0353	CCA0539S0061	CCA0524S0333	CCA0510S0070	CCA0516S0022	CCA0524S0229	CCA0546S0112	CCA0539S0087	CCA0526S0326	CCA0379S0001	CCA0524S0002	CCA0535S0053
CCA0529S0058	CCA0539S0080	CCA0524S0345	CCA0510S0076	CCA0516S0083	CCA0524S0238	CCA0546S0137	CCA0539S0089	CCA0527S0001	CCA0380S0001	CCA0524S0011	CCA0535S0057
CCA0533S0048	CCA0539S0159	CCA0524S0349	CCA0510S0081	CCA0516S0095	CCA0524S0251	CCA0546S0162	CCA0539S0148	CCA0529S0040	CCA0397S0001	CCA0524S0023	CCA0535S0098
CCA0533S0057	CCA0539S0166	CCA0524S0353	CCA0510S0094	CCA0516S0132	CCA0524S0260	CCA0546S0164	CCA0539S0176	CCA0529S0061	CCA0403S0014	CCA0524S0028	CCA0539S0028
CCA0533S0079	CCA0539S0185	CCA0524S0354	CCA0510S0095	CCA0520S0006	CCA0524S0309	CCA0546S0176	CCA0539S0215	CCA0529S0073	CCA0406S0001	CCA0524S0033	CCA0539S0048
CCA0533S0081	CCA0542S0032	CCA0524S0357	CCA0510S0098	CCA0520S0029	CCA0524S0311	CCA0546S0260	CCA0539S0220	CCA0533S0007	CCA0411S0001	CCA0524S0044	CCA0539S0058
CCA0533S0103	CCA0542S0033	CCA0524S0365	CCA0510S0102	CCA0520S0035	CCA0524S0344	CCA0546S0284	CCA0539S0231	CCA0533S0009	CCA0413S0002	CCA0524S0060	CCA0539S0078
CCA0533S0108	CCA0542S0119	CCA0525S0027	CCA0510S0111	CCA0520S0036	CCA0525S0012	CCA0546S0295	CCA0539S0238	CCA0533S0035	CCA0415S0001	CCA0524S0062	CCA0539S0108
CCA0533S0122	CCA0542S0150	CCA0525S0028	CCA0510S0115	CCA0520S0050	CCA0525S0020	CCA0549S0038	CCA0539S0249	CCA0533S0046	CCA0416S0001	CCA0524S0100	CCA0539S0157
CCA0533S0136	CCA0542S0171	CCA0525S0063	CCA0510S0120	CCA0520S0051	CCA0525S0021	CCA0549S0058	CCA0539S0273	CCA0533S0049	CCA0422S0001	CCA0524S0102	CCA0539S0160
CCA0533S0154	CCA0542S0187	CCA0525S0084	CCA0510S0130	CCA0520S0059	CCA0525S0039	CCA0549S0066	CCA0542S0009	CCA0533S0104	CCA0431S0010	CCA0524S0106	CCA0539S0169
CCA0533S0160	CCA0546S0017	CCA0525S0096	CCA0510S0160	CCA0520S0129	CCA0525S0042	CCA0549S0078	CCA0542S0022	CCA0533S0106	CCA0445S0001	CCA0524S0136	CCA0539S0198
CCA0533S0172	CCA0546S0019	CCA0525S0097	CCA0510S0171	CCA0520S0137	CCA0525S0043	CCA0549S0086	CCA0542S0038	CCA0533S0124	CCA0454S0001	CCA0524S0137	CCA0539S0213
CCA0533S0181	CCA0546S0040	CCA0525S0106	CCA0513S0002	CCA0520S0140	CCA0525S0044	CCA0549S0100	CCA0542S0082	CCA0533S0139	CCA0459S0001	CCA0524S0148	CCA0539S0217
CCA0533S0182	CCA0546S0086	CCA0525S0114	CCA0513S0007	CCA0520S0144	CCA0525S0045	CCA0549S0111	CCA0542S0083	CCA0533S0176	CCA0460S0001	CCA0524S0200	CCA0539S0241
CCA0533S0234	CCA0546S0092	CCA0525S0218	CCA0513S0070	CCA0520S0168	CCA0525S0061	CCA0549S0136	CCA0542S0101	CCA0533S0214	CCA0464S0003	CCA0524S0209	CCA0539S0251
CCA0533S0257	CCA0546S0115	CCA0526S0013	CCA0513S0096	CCA0520S0179	CCA0525S0065	CCA0549S0150	CCA0542S0105	CCA0533S0215	CCA0470S0001	CCA0524S0217	CCA0539S0277
CCA0535S0044	CCA0546S0151	CCA0526S0027	CCA0513S0104	CCA0520S0185	CCA0525S0103	CCA0552S0020	CCA0542S0128	CCA0535S0022	CCA0495S0007	CCA0524S0218	CCA0542S0002
CCA0535S0054	CCA0546S0152	CCA0526S0032	CCA0513S0121	CCA0520S0187	CCA0525S0108	CCA0552S0058	CCA0542S0130	CCA0535S0067	CCA0499S0001	CCA0524S0243	CCA0542S0006
CCA0535S0055	CCA0546S0156	CCA0526S0054	CCA0513S0124	CCA0520S0233	CCA0525S0118	CCA0552S0088	CCA0542S0155	CCA0535S0136	CCA0500S0004	CCA0524S0273	CCA0542S0018
CCA0535S0056	CCA0546S0157	CCA0526S0059	CCA0513S0131	CCA0520S0276	CCA0525S0132	CCA0552S0094	CCA0542S0179	CCA0539S0012	CCA0500S0011	CCA0524S0277	CCA0542S0019
CCA0535S0060	CCA0546S0175	CCA0526S0062	CCA0513S0163	CCA0522S0015	CCA0525S0137	CCA0552S0146	CCA0546S0005	CCA0539S0026	CCA0500S0026	CCA0524S0287	CCA0542S0025
CCA0535S0064	CCA0546S0195	CCA0526S0067	CCA0513S0166	CCA0522S0016	CCA0525S0151	CCA0552S0157	CCA0546S0033	CCA0539S0031	CCA0500S0039	CCA0524S0302	CCA0542S0043
CCA0535S0070	CCA0546S0196	CCA0526S0068	CCA0513S0167	CCA0522S0049	CCA0525S0163	CCA0552S0176	CCA0546S0035	CCA0539S0052	CCA0500S0045	CCA0524S0314	CCA0542S0084
CCA0535S0074	CCA0546S0204	CCA0526S0078	CCA0513S0203	CCA0522S0057	CCA0525S0170	CCA0552S0236	CCA0546S0048	CCA0539S0064	CCA0500S0052	CCA0524S0318	CCA0542S0112
CCA0535S0079	CCA0546S0213	CCA0526S0091	CCA0513S0211	CCA0522S0061	CCA0525S0197	CCA0552S0246	CCA0546S0058	CCA0539S0085	CCA0500S0054	CCA0524S0330	CCA0542S0182
CCA0535S0099	CCA0546S0236	CCA0526S0100	CCA0513S0216	CCA0522S0078	CCA0525S0206	CCA0552S0251	CCA0546S0060	CCA0539S0091	CCA0500S0067	CCA0524S0336	CCA0544S0001
CCA0535S0112	CCA0546S0238	CCA0526S0179	CCA0513S0221	CCA0522S0086	CCA0525S0213	CCA0552S0270	CCA0546S0074	CCA0539S0104	CCA0500S0073	CCA0524S0352	CCA0546S0046
CCA0535S0120	CCA0546S0266	CCA0526S0182	CCA0513S0245	CCA0522S0133	CCA0525S0214	CCA0552S0278	CCA0546S0078	CCA0539S0156	CCA0500S0096	CCA0525S0002	CCA0546S0077
CCA0536S0001	CCA0546S0306	CCA0526S0189	CCA0513S0246	CCA0522S0135	CCA0525S0216	CCA0555S0022	CCA0546S0085	CCA0539S0177	CCA0500S0099	CCA0525S0041	CCA0546S0113
CCA0539S0001	CCA0547S0001	CCA0526S0226	CCA0513S0250	CCA0522S0152	CCA0526S0003	CCA0555S0037	CCA0546S0087	CCA0539S0216	CCA0500S0108	CCA0525S0054	CCA0546S0119
CCA0539S0051	CCA0548S0001	CCA0526S0236	CCA0513S0251	CCA0522S0158	CCA0526S0005	CCA0555S0058	CCA0546S0098	CCA0539S0244	CCA0500S0109	CCA0525S0056	CCA0546S0121
CCA0539S0079	CCA0549S0020	CCA0526S0258	CCA0513S0256	CCA0522S0176	CCA0526S0015	CCA0555S0064	CCA0546S0099	CCA0539S0280	CCA0500S0133	CCA0525S0067	CCA0546S0161
CCA0539S0083	CCA0549S0042	CCA0526S0264	CCA0513S0267	CCA0522S0203	CCA0526S0016	CCA0555S0070	CCA0546S0108	CCA0542S0110	CCA0500S0136	CCA0525S0083	CCA0546S0163
CCA0539S0102	CCA0549S0049	CCA0526S0282	CCA0513S0286	CCA0522S0227	CCA0526S0019	CCA0555S0074	CCA0546S0111	CCA0542S0152	CCA0500S0137	CCA0525S0088	CCA0546S0168
CCA0539S0116	CCA0549S0053	CCA0529S0011	CCA0513S0287	CCA0522S0232	CCA0526S0040	CCA0555S0098	CCA0546S0114	CCA0542S0159	CCA0500S0193	CCA0525S0102	CCA0546S0185
CCA0539S0124	CCA0549S0056	CCA0529S0034	CCA0514S0011	CCA0522S0237	CCA0526S0071	CCA0555S0168	CCA0546S0116	CCA0546S0049	CCA0500S0201	CCA0525S0126	CCA0546S0190
CCA0539S0125	CCA0549S0095	CCA0529S0076	CCA0514S0027	CCA0522S0240	CCA0526S0090	CCA0555S0204	CCA0546S0120	CCA0546S0057	CCA0500S0230	CCA0525S0141	CCA0546S0208
CCA0539S0184	CCA0549S0135	CCA0529S0083	CCA0514S0043	CCA0522S0270	CCA0526S0196	CCA0555S0243	CCA0546S0124	CCA0546S0063	CCA0500S0249	CCA0525S0145	CCA0546S0211
CCA0539S0186	CCA0552S0051	CCA0529S0102	CCA0514S0083	CCA0522S0277	CCA0526S0222	CCA0559S0029	CCA0546S0142	CCA0546S0089	CCA0500S0255	CCA0525S0169	CCA0546S0215
CCA0539S0191	CCA0552S0052	CCA0529S0104	CCA0514S0094	CCA0524S0019	CCA0526S0228	CCA0559S0040	CCA0546S0149	CCA0546S0090	CCA0500S0266	CCA0525S0188	CCA0546S0225
CCA0539S0192	CCA0552S0067	CCA0533S0004	CCA0514S0109	CCA0524S0029	CCA0526S0243	CCA0559S0057	CCA0546S0187	CCA0546S0117	CCA0500S0286	CCA0525S0193	CCA0546S0253
CCA0539S0193	CCA0552S0072	CCA0533S0006	CCA0514S0138	CCA0524S0037	CCA0526S0288	CCA0559S0058	CCA0546S0201	CCA0546S0122	CCA0500S0298	CCA0525S0199	CCA0546S0263
CCA0539S0222	CCA0552S0089	CCA0533S0012	CCA0514S0170	CCA0524S0038	CCA0526S0294	CCA0559S0063	CCA0546S0202	CCA0546S0125	CCA0500S0307	CCA0525S0200	CCA0546S0278
CCA0539S0223	CCA0552S0108	CCA0533S0030	CCA0514S0171	CCA0524S0039	CCA0526S0301	CCA0559S0124	CCA0546S0205	CCA0546S0170	CCA0500S0309	CCA0525S0207	CCA0546S0309
CCA0539S0234	CCA0552S0112	CCA0533S0032	CCA0514S0174	CCA0524S0058	CCA0526S0330	CCA0559S0127	CCA0546S0222	CCA0546S0214	CCA0500S0335	CCA0526S0022	CCA0549S0001
CCA0539S0245	CCA0552S0118	CCA0533S0039	CCA0514S0177	CCA0524S0088	CCA0526S0333	CCA0559S0133	CCA0546S0224	CCA0546S0267	CCA0500S0346	CCA0526S0024	CCA0549S0025
CCA0542S0040	CCA0552S0130	CCA0533S0060	CCA0514S0196	CCA0524S0099	CCA0526S0352	CCA0563S0004	CCA0546S0235	CCA0546S0276	CCA0502S0008	CCA0526S0034	CCA0549S0034
CCA0542S0054	CCA0552S0159	CCA0533S0084	CCA0514S0227	CCA0524S0101	CCA0529S0065	CCA0563S0012	CCA0546S0237	CCA0549S0008	CCA0502S0009	CCA0526S0057	CCA0549S0097
CCA0542S0102	CCA0552S0163	CCA0533S0107	CCA0514S0247	CCA0524S0118	CCA0529S0075	CCA0563S0027	CCA0546S0251	CCA0549S0027	CCA0502S0067	CCA0526S0064	CCA0549S0156
CCA0542S0133	CCA0552S0174	CCA0533S0115	CCA0514S0266	CCA0524S0122	CCA0533S0003	CCA0563S0035	CCA0546S0264	CCA0549S0098	CCA0502S0071	CCA0526S0081	CCA0552S0039
CCA0542S0142	CCA0552S0175	CCA0533S0141	CCA0514S0276	CCA0524S0141	CCA0533S0041	CCA0563S0053	CCA0546S0272	CCA0549S0105	CCA0502S0087	CCA0526S0086	CCA0552S0041
CCA0542S0145	CCA0552S0184	CCA0533S0161	CCA0516S0004	CCA0524S0174	CCA0533S0133	CCA0563S0098	CCA0546S0274	CCA0549S0122	CCA0502S0100	CCA0526S0104	CCA0552S0070
CCA0542S0166	CCA0552S0200	CCA0533S0165	CCA0516S0005	CCA0524S0236	CCA0533S0158	CCA0565S0059	CCA0546S0275	CCA0549S0131	CCA0502S0108	CCA0526S0132	CCA0552S0125
CCA0546S0007	CCA0552S0238	CCA0533S0173	CCA0516S0012	CCA0524S0264	CCA0533S0216	CCA0566S0017	CCA0546S0305	CCA0552S0007	CCA0502S0111	CCA0526S0133	CCA0552S0169
CCA0546S0012	CCA0552S0243	CCA0533S0183	CCA0516S0013	CCA0524S0283	CCA0533S0217	CCA0566S0019	CCA0549S0011	CCA0552S0015	CCA0502S0169	CCA0526S0138	CCA0552S0183
CCA0546S0028	CCA0552S0267	CCA0533S0230	CCA0516S0081	CCA0524S0284	CCA0533S0235	CCA0566S0055	CCA0549S0018	CCA0552S0018	CCA0502S0171	CCA0526S0150	CCA0552S0191
CCA0546S0029	CCA0552S0268	CCA0535S0006	CCA0516S0128	CCA0524S0300	CCA0535S0080	CCA0566S0074	CCA0549S0041	CCA0552S0021	CCA0502S0174	CCA0526S0161	CCA0552S0192
CCA0546S0064	CCA0555S0001	CCA0535S0008	CCA0516S0133	CCA0524S0307	CCA0535S0083	CCA0566S0084	CCA0549S0045	CCA0552S0044	CCA0502S0181	CCA0526S0166	CCA0552S0194
CCA0546S0075	CCA0555S0007	CCA0535S0069	CCA0516S0136	CCA0524S0308	CCA0535S0088	CCA0566S0086	CCA0549S0063	CCA0552S0082	CCA0502S0183	CCA0526S0173	CCA0552S0226
CCA0546S0103	CCA0555S0018	CCA0535S0075	CCA0516S0137	CCA0524S0319	CCA0535S0100	CCA0566S0101	CCA0549S0073	CCA0552S0084	CCA0502S0191	CCA0526S0206	CCA0555S0053
CCA0546S0126	CCA0555S0032	CCA0535S0081	CCA0520S0039	CCA0524S0335	CCA0535S0104	CCA0566S0140	CCA0549S0091	CCA0552S0090	CCA0502S0196	CCA0526S0224	CCA0555S0090
CCA0546S0139	CCA0555S0038	CCA0535S0115	CCA0520S0056	CCA0524S0340	CCA0535S0139	CCA0568S0021	CCA0549S0113	CCA0552S0105	CCA0505S0016	CCA0526S0229	CCA0555S0103
CCA0546S0159	CCA0555S0080	CCA0535S0129	CCA0520S0070	CCA0525S0006	CCA0535S0141	CCA0573S0027	CCA0549S0153	CCA0552S0106	CCA0505S0041	CCA0526S0253	CCA0555S0105
CCA0546S0182	CCA0555S0085	CCA0535S0132	CCA0520S0080	CCA0525S0013	CCA0539S0020	CCA0573S0031	CCA0552S0057	CCA0552S0149	CCA0505S0055	CCA0526S0261	CCA0555S0106
CCA0546S0193	CCA0555S0102	CCA0535S0140	CCA0520S0100	CCA0525S0018	CCA0539S0021	CCA0573S0034	CCA0552S0091	CCA0552S0156	CCA0505S0080	CCA0526S0262	CCA0555S0124
CCA0546S0230	CCA0555S0107	CCA0539S0011	CCA0520S0111	CCA0525S0032	CCA0539S0032	CCA0573S0056	CCA0552S0095	CCA0552S0172	CCA0505S0087	CCA0526S0279	CCA0555S0148
CCA0546S0232	CCA0555S0142	CCA0539S0014	CCA0520S0156	CCA0525S0066	CCA0539S0034	CCA0573S0057	CCA0552S0097	CCA0552S0178	CCA0505S0103	CCA0526S0283	CCA0555S0174
CCA0546S0241	CCA0555S0143	CCA0539S0016	CCA0520S0163	CCA0525S0101	CCA0539S0050	CCA0573S0059	CCA0552S0099	CCA0552S0207	CCA0505S0109	CCA0526S0289	CCA0555S0175
CCA0546S0250	CCA0555S0149	CCA0539S0029	CCA0520S0184	CCA0525S0105	CCA0539S0067	CCA0573S0065	CCA0552S0129	CCA0552S0214	CCA0505S0110	CCA0526S0303	CCA0555S0197
CCA0546S0269	CCA0555S0155	CCA0539S0033	CCA0520S0192	CCA0525S0127	CCA0539S0096	CCA0573S0077	CCA0552S0136	CCA0552S0230	CCA0505S0131	CCA0526S0306	CCA0555S0208
CCA0546S0270	CCA0555S0180	CCA0539S0049	CCA0520S0218	CCA0525S0135	CCA0539S0099	CCA0573S0085	CCA0552S0211	CCA0552S0255	CCA0505S0143	CCA0526S0307	CCA0555S0210
CCA0546S0303	CCA0555S0188	CCA0539S0069	CCA0520S0226	CCA0525S0148	CCA0539S0112	CCA0573S0090	CCA0552S0228	CCA0552S0269	CCA0505S0168	CCA0526S0310	CCA0555S0239
CCA0546S0311	CCA0555S0209	CCA0539S0072	CCA0520S0236	CCA0525S0155	CCA0539S0150	CCA0573S0147	CCA0552S0234	CCA0555S0110	CCA0505S0178	CCA0526S0315	CCA0555S0242
CCA0549S0007	CCA0555S0219	CCA0539S0073	CCA0520S0253	CCA0525S0176	CCA0539S0158	CCA0573S0149	CCA0552S0241	CCA0555S0130	CCA0505S0213	CCA0526S0317	CCA0555S0255
CCA0549S0017	CCA0555S0221	CCA0539S0136	CCA0520S0258	CCA0525S0196	CCA0539S0168	CCA0573S0156	CCA0552S0242	CCA0555S0133	CCA0505S0216	CCA0526S0320	CCA0559S0044
CCA0549S0033	CCA0555S0240	CCA0539S0154	CCA0522S0041	CCA0526S0007	CCA0539S0171	CCA0573S0204	CCA0552S0252	CCA0555S0134	CCA0505S0218	CCA0529S0007	CCA0559S0067
CCA0549S0040	CCA0559S0014	CCA0539S0170	CCA0522S0056	CCA0526S0020	CCA0539S0175	CCA0576S0036	CCA0552S0259	CCA0555S0135	CCA0505S0224	CCA0529S0013	CCA0559S0091
CCA0549S0047	CCA0559S0024	CCA0539S0182	CCA0522S0065	CCA0526S0033	CCA0539S0187	CCA0576S0042	CCA0555S0059	CCA0555S0136	CCA0505S0258	CCA0529S0025	CCA0559S0093
CCA0549S0084	CCA0559S0049	CCA0539S0219	CCA0522S0077	CCA0526S0035	CCA0539S0189	CCA0576S0089	CCA0555S0062	CCA0555S0138	CCA0505S0269	CCA0529S0044	CCA0559S0094
CCA0549S0088	CCA0559S0129	CCA0539S0221	CCA0522S0081	CCA0526S0038	CCA0539S0203	CCA0576S0103	CCA0555S0071	CCA0555S0139	CCA0505S0288	CCA0529S0084	CCA0559S0099
CCA0549S0119	CCA0559S0142	CCA0539S0227	CCA0522S0098	CCA0526S0056	CCA0539S0208	CCA0576S0112	CCA0555S0088	CCA0555S0160	CCA0505S0293	CCA0532S0001	CCA0559S0122
CCA0549S0120	CCA0559S0147	CCA0539S0229	CCA0522S0099	CCA0526S0060	CCA0539S0214	CCA0576S0118	CCA0555S0091	CCA0555S0161	CCA0505S0306	CCA0533S0014	CCA0559S0152
CCA0549S0121	CCA0559S0151	CCA0539S0239	CCA0522S0100	CCA0526S0061	CCA0539S0226	CCA0576S0140	CCA0555S0093	CCA0555S0162	CCA0505S0325	CCA0533S0022	CCA0563S0036
CCA0549S0155	CCA0563S0026	CCA0539S0240	CCA0522S0104	CCA0526S0063	CCA0539S0230	CCA0576S0149	CCA0555S0203	CCA0555S0163	CCA0505S0343	CCA0533S0055	CCA0563S0101
CCA0549S0158	CCA0565S0015	CCA0539S0242	CCA0522S0109	CCA0526S0080	CCA0539S0274	CCA0576S0168	CCA0555S0211	CCA0555S0176	CCA0505S0354	CCA0533S0064	CCA0565S0074
CCA0552S0001	CCA0565S0034	CCA0539S0259	CCA0522S0110	CCA0526S0101	CCA0542S0005	CCA0576S0192	CCA0555S0215	CCA0555S0182	CCA0507S0016	CCA0533S0076	CCA0565S0090
CCA0552S0076	CCA0565S0037	CCA0539S0263	CCA0522S0119	CCA0526S0109	CCA0542S0015	CCA0576S0212	CCA0555S0216	CCA0555S0184	CCA0507S0030	CCA0533S0077	CCA0565S0109
CCA0552S0137	CCA0565S0077	CCA0539S0266	CCA0522S0128	CCA0526S0120	CCA0542S0016	CCA0576S0220	CCA0555S0217	CCA0555S0214	CCA0507S0074	CCA0533S0080	CCA0566S0025
CCA0552S0138	CCA0565S0087	CCA0539S0267	CCA0522S0153	CCA0526S0121	CCA0542S0039	CCA0576S0235	CCA0555S0223	CCA0555S0226	CCA0507S0119	CCA0533S0095	CCA0566S0049
CCA0552S0196	CCA0565S0092	CCA0541S0002	CCA0522S0155	CCA0526S0126	CCA0542S0049	CCA0578S0004	CCA0555S0227	CCA0555S0235	CCA0507S0137	CCA0533S0112	CCA0566S0095
CCA0552S0204	CCA0565S0093	CCA0542S0012	CCA0522S0191	CCA0526S0127	CCA0542S0055	CCA0578S0020	CCA0555S0253	CCA0555S0252	CCA0507S0157	CCA0533S0116	CCA0566S0126
CCA0552S0217	CCA0565S0107	CCA0542S0021	CCA0522S0194	CCA0526S0134	CCA0542S0059	CCA0578S0064	CCA0559S0009	CCA0559S0020	CCA0507S0182	CCA0533S0127	CCA0566S0132
CCA0552S0221	CCA0566S0032	CCA0542S0031	CCA0522S0244	CCA0526S0142	CCA0542S0061	CCA0578S0083	CCA0559S0013	CCA0559S0134	CCA0507S0192	CCA0533S0129	CCA0566S0142
CCA0552S0249	CCA0566S0043	CCA0542S0041	CCA0522S0269	CCA0526S0145	CCA0542S0096	CCA0578S0088	CCA0559S0053	CCA0559S0138	CCA0507S0206	CCA0533S0132	CCA0566S0144
CCA0552S0257	CCA0566S0068	CCA0542S0047	CCA0522S0282	CCA0526S0151	CCA0542S0116	CCA0578S0090	CCA0559S0112	CCA0559S0146	CCA0507S0237	CCA0533S0134	CCA0566S0151
CCA0552S0279	CCA0566S0075	CCA0542S0081	CCA0524S0004	CCA0526S0153	CCA0542S0120	CCA0578S0131	CCA0559S0131	CCA0563S0022	CCA0507S0245	CCA0533S0135	CCA0568S0004
CCA0555S0025	CCA0566S0102	CCA0542S0092	CCA0524S0022	CCA0526S0180	CCA0542S0121	CCA0582S0002	CCA0559S0144	CCA0565S0032	CCA0507S0252	CCA0533S0140	CCA0568S0041
CCA0555S0027	CCA0566S0133	CCA0542S0104	CCA0524S0049	CCA0526S0234	CCA0542S0124	CCA0582S0025	CCA0561S0001	CCA0565S0094	CCA0507S0253	CCA0533S0157	CCA0568S0047
CCA0555S0030	CCA0566S0135	CCA0542S0122	CCA0524S0053	CCA0526S0244	CCA0545S0001	CCA0582S0033	CCA0563S0029	CCA0565S0096	CCA0507S0254	CCA0533S0167	CCA0568S0057
CCA0555S0044	CCA0566S0148	CCA0542S0188	CCA0524S0054	CCA0526S0274	CCA0546S0026	CCA0582S0096	CCA0563S0043	CCA0565S0106	CCA0507S0276	CCA0533S0171	CCA0568S0071
CCA0555S0048	CCA0566S0157	CCA0546S0024	CCA0524S0056	CCA0526S0300	CCA0546S0034	CCA0582S0121	CCA0563S0048	CCA0565S0110	CCA0507S0299	CCA0533S0177	CCA0568S0080
CCA0555S0052	CCA0568S0027	CCA0546S0031	CCA0524S0069	CCA0526S0313	CCA0546S0038	CCA0582S0122	CCA0563S0052	CCA0565S0129	CCA0507S0315	CCA0533S0188	CCA0572S0001
CCA0555S0115	CCA0573S0001	CCA0546S0067	CCA0524S0086	CCA0526S0324	CCA0546S0050	CCA0582S0125	CCA0563S0082	CCA0566S0061	CCA0510S0005	CCA0533S0206	CCA0573S0003
CCA0555S0116	CCA0573S0014	CCA0546S0100	CCA0524S0114	CCA0526S0327	CCA0546S0055	CCA0582S0132	CCA0565S0048	CCA0566S0069	CCA0510S0032	CCA0533S0210	CCA0573S0007
CCA0555S0120	CCA0573S0046	CCA0546S0135	CCA0524S0145	CCA0526S0328	CCA0546S0066	CCA0582S0147	CCA0565S0051	CCA0566S0071	CCA0510S0040	CCA0533S0227	CCA0573S0032
CCA0555S0154	CCA0573S0058	CCA0546S0141	CCA0524S0169	CCA0529S0010	CCA0546S0069	CCA0582S0178	CCA0565S0082	CCA0566S0118	CCA0510S0055	CCA0533S0231	CCA0573S0047
CCA0555S0156	CCA0573S0061	CCA0546S0154	CCA0524S0179	CCA0529S0067	CCA0546S0084	CCA0582S0183	CCA0565S0114	CCA0566S0119	CCA0510S0057	CCA0535S0030	CCA0573S0088
CCA0555S0165	CCA0573S0075	CCA0546S0158	CCA0524S0233	CCA0529S0070	CCA0546S0102	CCA0583S0013	CCA0566S0021	CCA0566S0139	CCA0510S0077	CCA0535S0031	CCA0573S0093
CCA0555S0166	CCA0573S0087	CCA0546S0177	CCA0524S0239	CCA0529S0101	CCA0546S0109	CCA0583S0032	CCA0566S0024	CCA0568S0012	CCA0510S0078	CCA0535S0041	CCA0573S0141
CCA0555S0183	CCA0573S0205	CCA0546S0178	CCA0524S0240	CCA0533S0018	CCA0546S0118	CCA0583S0073	CCA0566S0036	CCA0568S0038	CCA0510S0080	CCA0535S0065	CCA0573S0175
CCA0555S0196	CCA0576S0002	CCA0546S0189	CCA0524S0327	CCA0533S0028	CCA0546S0127	CCA0583S0076	CCA0566S0051	CCA0568S0042	CCA0510S0100	CCA0535S0084	CCA0573S0182
CCA0555S0199	CCA0576S0037	CCA0546S0191	CCA0524S0371	CCA0533S0042	CCA0546S0145	CCA0583S0087	CCA0566S0073	CCA0568S0050	CCA0510S0106	CCA0535S0087	CCA0573S0183
CCA0555S0241	CCA0576S0051	CCA0546S0199	CCA0525S0010	CCA0533S0051	CCA0546S0165	CCA0583S0101	CCA0566S0088	CCA0573S0023	CCA0510S0108	CCA0535S0097	CCA0573S0187
CCA0555S0246	CCA0576S0088	CCA0546S0203	CCA0525S0089	CCA0533S0053	CCA0546S0180	CCA0587S0036	CCA0566S0098	CCA0573S0099	CCA0510S0110	CCA0535S0107	CCA0573S0190
CCA0559S0060	CCA0576S0092	CCA0546S0218	CCA0525S0168	CCA0533S0056	CCA0546S0181	CCA0587S0037	CCA0566S0099	CCA0573S0132	CCA0510S0117	CCA0535S0113	CCA0573S0191
CCA0559S0076	CCA0576S0093	CCA0546S0259	CCA0525S0172	CCA0533S0058	CCA0546S0220	CCA0587S0040	CCA0566S0105	CCA0573S0157	CCA0510S0131	CCA0535S0121	CCA0576S0034
CCA0559S0100	CCA0576S0128	CCA0546S0261	CCA0525S0189	CCA0533S0068	CCA0546S0223	CCA0587S0056	CCA0566S0108	CCA0573S0168	CCA0510S0140	CCA0535S0123	CCA0576S0050
CCA0559S0110	CCA0576S0164	CCA0546S0282	CCA0525S0198	CCA0533S0069	CCA0546S0229	CCA0587S0120	CCA0566S0134	CCA0573S0181	CCA0510S0157	CCA0539S0002	CCA0576S0079
CCA0559S0149	CCA0576S0223	CCA0546S0293	CCA0526S0023	CCA0533S0111	CCA0546S0268	CCA0587S0125	CCA0566S0168	CCA0573S0197	CCA0510S0167	CCA0539S0005	CCA0576S0097
CCA0563S0005	CCA0576S0228	CCA0546S0294	CCA0526S0042	CCA0533S0118	CCA0546S0279	CCA0587S0203	CCA0566S0169	CCA0573S0207	CCA0513S0008	CCA0539S0008	CCA0576S0098
CCA0563S0007	CCA0576S0234	CCA0546S0298	CCA0526S0044	CCA0533S0120	CCA0546S0280	CCA0587S0214	CCA0566S0171	CCA0576S0008	CCA0513S0014	CCA0539S0030	CCA0576S0106
CCA0563S0057	CCA0576S0238	CCA0546S0308	CCA0526S0055	CCA0533S0130	CCA0546S0285	CCA0589S0005	CCA0566S0175	CCA0576S0020	CCA0513S0027	CCA0539S0056	CCA0576S0129
CCA0565S0013	CCA0576S0247	CCA0549S0004	CCA0526S0069	CCA0533S0192	CCA0546S0287	CCA0589S0029	CCA0567S0003	CCA0576S0027	CCA0513S0039	CCA0539S0062	CCA0576S0136
CCA0565S0098	CCA0576S0253	CCA0549S0043	CCA0526S0087	CCA0533S0200	CCA0546S0300	CCA0589S0062	CCA0568S0011	CCA0576S0043	CCA0513S0073	CCA0539S0068	CCA0576S0138
CCA0565S0111	CCA0576S0254	CCA0549S0048	CCA0526S0105	CCA0533S0201	CCA0549S0036	CCA0589S0083	CCA0568S0025	CCA0576S0046	CCA0513S0080	CCA0539S0106	CCA0576S0139
CCA0565S0124	CCA0576S0262	CCA0549S0054	CCA0526S0146	CCA0533S0209	CCA0549S0046	CCA0589S0142	CCA0573S0025	CCA0576S0059	CCA0513S0085	CCA0539S0113	CCA0576S0159
CCA0566S0002	CCA0576S0263	CCA0549S0064	CCA0526S0177	CCA0533S0219	CCA0549S0082	CCA0589S0164	CCA0573S0054	CCA0576S0061	CCA0513S0090	CCA0539S0121	CCA0576S0183
CCA0566S0007	CCA0578S0016	CCA0549S0114	CCA0526S0201	CCA0533S0236	CCA0549S0143	CCA0589S0177	CCA0573S0104	CCA0576S0077	CCA0513S0094	CCA0539S0135	CCA0576S0191
CCA0566S0009	CCA0578S0054	CCA0549S0124	CCA0526S0231	CCA0533S0240	CCA0549S0149	CCA0589S0178	CCA0573S0135	CCA0576S0095	CCA0513S0101	CCA0539S0140	CCA0576S0196
CCA0566S0010	CCA0578S0074	CCA0549S0125	CCA0526S0245	CCA0535S0004	CCA0552S0019	CCA0589S0183	CCA0573S0145	CCA0576S0137	CCA0513S0102	CCA0539S0142	CCA0576S0206
CCA0566S0018	CCA0578S0104	CCA0549S0145	CCA0526S0255	CCA0535S0015	CCA0552S0023	CCA0589S0200	CCA0573S0172	CCA0576S0167	CCA0513S0109	CCA0539S0145	CCA0576S0237
CCA0566S0104	CCA0578S0107	CCA0549S0152	CCA0526S0259	CCA0535S0037	CCA0552S0026	CCA0589S0207	CCA0573S0192	CCA0576S0170	CCA0513S0111	CCA0539S0153	CCA0576S0252
CCA0566S0112	CCA0582S0001	CCA0549S0157	CCA0526S0263	CCA0535S0046	CCA0552S0074	CCA0589S0214	CCA0573S0199	CCA0576S0172	CCA0513S0146	CCA0539S0178	CCA0576S0264
CCA0566S0116	CCA0582S0014	CCA0552S0024	CCA0526S0277	CCA0535S0134	CCA0552S0085	CCA0589S0227	CCA0573S0202	CCA0576S0181	CCA0513S0153	CCA0539S0183	CCA0578S0024
CCA0566S0122	CCA0582S0017	CCA0552S0025	CCA0526S0285	CCA0536S0002	CCA0552S0092	CCA0589S0228	CCA0576S0069	CCA0576S0204	CCA0513S0185	CCA0539S0188	CCA0578S0028
CCA0566S0143	CCA0582S0042	CCA0552S0100	CCA0526S0308	CCA0539S0006	CCA0552S0104	CCA0589S0241	CCA0576S0071	CCA0576S0205	CCA0513S0202	CCA0539S0201	CCA0578S0100
CCA0566S0155	CCA0582S0043	CCA0552S0103	CCA0526S0334	CCA0539S0019	CCA0552S0127	CCA0589S0242	CCA0576S0073	CCA0576S0240	CCA0513S0208	CCA0539S0232	CCA0578S0108
CCA0566S0173	CCA0582S0060	CCA0552S0139	CCA0526S0345	CCA0539S0045	CCA0552S0134	CCA0591S0041	CCA0576S0109	CCA0576S0255	CCA0513S0241	CCA0539S0236	CCA0578S0151
CCA0566S0177	CCA0582S0061	CCA0552S0181	CCA0529S0021	CCA0539S0059	CCA0552S0142	CCA0591S0044	CCA0576S0122	CCA0576S0257	CCA0513S0265	CCA0539S0258	CCA0582S0045
CCA0566S0178	CCA0582S0064	CCA0552S0195	CCA0529S0072	CCA0539S0107	CCA0552S0166	CCA0591S0055	CCA0576S0153	CCA0578S0008	CCA0513S0289	CCA0539S0269	CCA0582S0048
CCA0566S0184	CCA0582S0074	CCA0552S0201	CCA0529S0085	CCA0539S0109	CCA0552S0188	CCA0591S0104	CCA0576S0194	CCA0578S0050	CCA0513S0328	CCA0539S0279	CCA0582S0078
CCA0568S0016	CCA0582S0084	CCA0552S0205	CCA0529S0091	CCA0539S0117	CCA0552S0197	CCA0591S0121	CCA0576S0207	CCA0578S0071	CCA0513S0336	CCA0540S0001	CCA0582S0100
CCA0568S0043	CCA0582S0112	CCA0552S0248	CCA0530S0001	CCA0539S0133	CCA0552S0198	CCA0591S0126	CCA0576S0217	CCA0578S0076	CCA0513S0360	CCA0541S0001	CCA0582S0101
CCA0568S0052	CCA0582S0134	CCA0552S0253	CCA0533S0027	CCA0539S0141	CCA0552S0212	CCA0591S0133	CCA0576S0246	CCA0582S0019	CCA0514S0008	CCA0542S0007	CCA0582S0113
CCA0568S0058	CCA0582S0140	CCA0552S0271	CCA0533S0047	CCA0539S0167	CCA0552S0213	CCA0591S0152	CCA0576S0260	CCA0582S0046	CCA0514S0020	CCA0542S0017	CCA0582S0138
CCA0568S0068	CCA0583S0075	CCA0555S0031	CCA0533S0110	CCA0539S0204	CCA0552S0273	CCA0595S0012	CCA0576S0265	CCA0582S0047	CCA0514S0030	CCA0542S0042	CCA0582S0142
CCA0568S0078	CCA0585S0001	CCA0555S0060	CCA0533S0148	CCA0539S0243	CCA0552S0274	CCA0595S0033	CCA0576S0266	CCA0582S0085	CCA0514S0055	CCA0542S0050	CCA0582S0150
CCA0573S0012	CCA0587S0004	CCA0555S0065	CCA0533S0149	CCA0539S0257	CCA0552S0282	CCA0595S0037	CCA0576S0275	CCA0583S0042	CCA0514S0061	CCA0542S0106	CCA0582S0172
CCA0573S0038	CCA0587S0008	CCA0555S0068	CCA0533S0189	CCA0539S0262	CCA0555S0026	CCA0595S0057	CCA0576S0277	CCA0583S0105	CCA0514S0065	CCA0542S0117	CCA0582S0174
CCA0573S0064	CCA0587S0013	CCA0555S0082	CCA0533S0242	CCA0539S0275	CCA0555S0028	CCA0595S0084	CCA0578S0026	CCA0587S0034	CCA0514S0069	CCA0542S0156	CCA0582S0175
CCA0573S0098	CCA0587S0017	CCA0555S0089	CCA0533S0250	CCA0542S0003	CCA0555S0034	CCA0595S0119	CCA0578S0077	CCA0587S0075	CCA0514S0078	CCA0542S0174	CCA0583S0016
CCA0573S0103	CCA0587S0064	CCA0555S0100	CCA0535S0029	CCA0542S0008	CCA0555S0094	CCA0595S0128	CCA0578S0096	CCA0587S0115	CCA0514S0081	CCA0542S0176	CCA0583S0074
CCA0573S0106	CCA0587S0116	CCA0555S0101	CCA0535S0042	CCA0542S0013	CCA0555S0097	CCA0597S0143	CCA0578S0113	CCA0587S0133	CCA0514S0090	CCA0542S0184	CCA0583S0110
CCA0573S0109	CCA0587S0126	CCA0555S0126	CCA0535S0050	CCA0542S0051	CCA0555S0099	CCA0597S0167	CCA0578S0133	CCA0587S0175	CCA0514S0093	CCA0542S0185	CCA0587S0103
CCA0573S0130	CCA0587S0127	CCA0555S0146	CCA0535S0059	CCA0542S0052	CCA0555S0104	CCA0597S0171	CCA0578S0137	CCA0587S0181	CCA0514S0101	CCA0546S0042	CCA0587S0114
CCA0573S0140	CCA0587S0138	CCA0555S0150	CCA0535S0066	CCA0542S0080	CCA0555S0113	CCA0598S0010	CCA0578S0140	CCA0587S0197	CCA0514S0112	CCA0546S0051	CCA0587S0148
CCA0573S0146	CCA0587S0145	CCA0555S0177	CCA0535S0086	CCA0542S0086	CCA0555S0117	CCA0598S0011	CCA0578S0141	CCA0589S0033	CCA0514S0120	CCA0546S0052	CCA0587S0165
CCA0573S0167	CCA0587S0176	CCA0555S0181	CCA0535S0103	CCA0542S0115	CCA0555S0125	CCA0598S0026	CCA0578S0142	CCA0589S0043	CCA0514S0121	CCA0546S0062	CCA0587S0193
CCA0573S0184	CCA0589S0013	CCA0555S0202	CCA0535S0111	CCA0542S0175	CCA0555S0137	CCA0598S0038	CCA0578S0143	CCA0589S0053	CCA0514S0124	CCA0546S0082	CCA0587S0194
CCA0573S0208	CCA0589S0059	CCA0555S0224	CCA0535S0114	CCA0546S0027	CCA0555S0152	CCA0598S0053	CCA0578S0154	CCA0589S0071	CCA0514S0148	CCA0546S0093	CCA0587S0195
CCA0575S0004	CCA0589S0124	CCA0555S0225	CCA0535S0133	CCA0546S0059	CCA0555S0164	CCA0598S0055	CCA0582S0005	CCA0589S0096	CCA0514S0156	CCA0546S0097	CCA0587S0216
CCA0576S0001	CCA0589S0137	CCA0555S0236	CCA0539S0035	CCA0546S0068	CCA0555S0167	CCA0598S0059	CCA0582S0012	CCA0589S0145	CCA0514S0163	CCA0546S0106	CCA0587S0227
CCA0576S0035	CCA0589S0185	CCA0555S0251	CCA0539S0075	CCA0546S0081	CCA0555S0170	CCA0598S0067	CCA0582S0063	CCA0589S0210	CCA0514S0180	CCA0546S0123	CCA0589S0004
CCA0576S0058	CCA0589S0194	CCA0558S0002	CCA0539S0077	CCA0546S0083	CCA0555S0178	CCA0598S0088	CCA0582S0068	CCA0589S0225	CCA0514S0197	CCA0546S0166	CCA0589S0034
CCA0576S0067	CCA0589S0196	CCA0559S0026	CCA0539S0086	CCA0546S0096	CCA0555S0186	CCA0598S0103	CCA0582S0072	CCA0589S0238	CCA0514S0199	CCA0546S0179	CCA0589S0035
CCA0576S0076	CCA0589S0220	CCA0559S0061	CCA0539S0095	CCA0546S0110	CCA0555S0195	CCA0598S0105	CCA0582S0103	CCA0589S0239	CCA0514S0219	CCA0546S0198	CCA0589S0037
CCA0576S0078	CCA0591S0011	CCA0559S0066	CCA0539S0111	CCA0546S0129	CCA0555S0220	CCA0598S0109	CCA0582S0108	CCA0591S0095	CCA0514S0222	CCA0546S0221	CCA0589S0048
CCA0576S0082	CCA0591S0023	CCA0559S0068	CCA0539S0126	CCA0546S0130	CCA0555S0228	CCA0598S0132	CCA0582S0114	CCA0591S0123	CCA0514S0226	CCA0546S0227	CCA0589S0055
CCA0576S0084	CCA0591S0032	CCA0559S0090	CCA0539S0196	CCA0546S0131	CCA0555S0230	CCA0601S0009	CCA0582S0118	CCA0595S0025	CCA0514S0238	CCA0546S0243	CCA0589S0067
CCA0576S0117	CCA0591S0071	CCA0559S0114	CCA0539S0202	CCA0546S0132	CCA0555S0238	CCA0601S0035	CCA0582S0128	CCA0595S0062	CCA0514S0261	CCA0546S0271	CCA0589S0073
CCA0576S0120	CCA0591S0112	CCA0559S0116	CCA0539S0210	CCA0546S0133	CCA0559S0023	CCA0601S0041	CCA0582S0143	CCA0595S0065	CCA0514S0262	CCA0549S0002	CCA0589S0076
CCA0576S0123	CCA0591S0144	CCA0559S0130	CCA0539S0253	CCA0546S0146	CCA0559S0025	CCA0601S0093	CCA0582S0148	CCA0595S0072	CCA0514S0273	CCA0549S0009	CCA0589S0085
CCA0576S0133	CCA0591S0145	CCA0559S0135	CCA0539S0254	CCA0546S0147	CCA0559S0037	CCA0601S0115	CCA0583S0024	CCA0595S0079	CCA0514S0277	CCA0549S0015	CCA0589S0105
CCA0576S0147	CCA0595S0016	CCA0559S0145	CCA0539S0272	CCA0546S0155	CCA0559S0038	CCA0601S0116	CCA0583S0045	CCA0595S0143	CCA0514S0279	CCA0549S0019	CCA0589S0109
CCA0576S0148	CCA0595S0055	CCA0559S0154	CCA0539S0276	CCA0546S0167	CCA0559S0055	CCA0605S0024	CCA0583S0048	CCA0595S0149	CCA0514S0285	CCA0549S0035	CCA0589S0125
CCA0576S0150	CCA0595S0066	CCA0559S0156	CCA0542S0011	CCA0546S0173	CCA0559S0097	CCA0605S0053	CCA0583S0058	CCA0597S0025	CCA0516S0003	CCA0549S0037	CCA0589S0158
CCA0576S0151	CCA0595S0083	CCA0563S0014	CCA0542S0037	CCA0546S0186	CCA0559S0102	CCA0605S0058	CCA0587S0006	CCA0597S0030	CCA0516S0034	CCA0549S0062	CCA0589S0219
CCA0576S0162	CCA0595S0092	CCA0563S0034	CCA0542S0060	CCA0546S0192	CCA0559S0104	CCA0605S0103	CCA0587S0018	CCA0597S0086	CCA0516S0046	CCA0549S0083	CCA0589S0221
CCA0576S0171	CCA0595S0112	CCA0563S0040	CCA0542S0123	CCA0546S0226	CCA0559S0125	CCA0605S0110	CCA0587S0051	CCA0597S0092	CCA0520S0008	CCA0549S0099	CCA0589S0223
CCA0576S0249	CCA0595S0138	CCA0563S0042	CCA0542S0129	CCA0546S0233	CCA0559S0132	CCA0606S0001	CCA0587S0063	CCA0597S0100	CCA0520S0009	CCA0549S0138	CCA0589S0232
CCA0576S0272	CCA0595S0142	CCA0563S0049	CCA0542S0149	CCA0546S0234	CCA0559S0139	CCA0613S0018	CCA0587S0066	CCA0597S0108	CCA0520S0026	CCA0549S0141	CCA0591S0082
CCA0578S0038	CCA0597S0026	CCA0563S0089	CCA0542S0170	CCA0546S0291	CCA0559S0148	CCA0613S0023	CCA0587S0073	CCA0597S0145	CCA0520S0044	CCA0552S0002	CCA0591S0084
CCA0578S0053	CCA0597S0038	CCA0563S0094	CCA0546S0043	CCA0546S0292	CCA0563S0025	CCA0613S0056	CCA0587S0078	CCA0597S0206	CCA0520S0068	CCA0552S0014	CCA0591S0090
CCA0578S0070	CCA0597S0055	CCA0563S0099	CCA0546S0053	CCA0546S0302	CCA0563S0060	CCA0616S0022	CCA0587S0109	CCA0598S0001	CCA0520S0085	CCA0552S0045	CCA0591S0107
CCA0578S0081	CCA0597S0057	CCA0565S0008	CCA0546S0080	CCA0546S0307	CCA0563S0062	CCA0616S0052	CCA0587S0159	CCA0598S0008	CCA0520S0099	CCA0552S0049	CCA0592S0001
CCA0578S0128	CCA0597S0058	CCA0565S0022	CCA0546S0095	CCA0546S0310	CCA0563S0063	CCA0616S0069	CCA0587S0173	CCA0598S0070	CCA0520S0110	CCA0552S0055	CCA0595S0010
CCA0578S0129	CCA0597S0075	CCA0565S0072	CCA0546S0136	CCA0549S0006	CCA0563S0090	CCA0616S0096	CCA0589S0046	CCA0598S0099	CCA0520S0118	CCA0552S0063	CCA0595S0059
CCA0578S0132	CCA0597S0111	CCA0565S0079	CCA0546S0138	CCA0549S0010	CCA0563S0093	CCA0616S0120	CCA0589S0060	CCA0598S0117	CCA0520S0119	CCA0552S0064	CCA0595S0075
CCA0578S0146	CCA0597S0160	CCA0565S0083	CCA0546S0140	CCA0549S0021	CCA0565S0009	CCA0616S0163	CCA0589S0061	CCA0601S0005	CCA0520S0124	CCA0552S0065	CCA0595S0085
CCA0579S0006	CCA0597S0165	CCA0565S0113	CCA0546S0160	CCA0549S0044	CCA0565S0029	CCA0620S0015	CCA0589S0068	CCA0601S0013	CCA0520S0150	CCA0552S0107	CCA0595S0099
CCA0582S0023	CCA0597S0169	CCA0565S0119	CCA0546S0174	CCA0549S0059	CCA0565S0030	CCA0620S0020	CCA0589S0077	CCA0601S0062	CCA0520S0160	CCA0552S0135	CCA0595S0121
CCA0582S0038	CCA0597S0184	CCA0566S0016	CCA0546S0184	CCA0549S0072	CCA0565S0084	CCA0623S0013	CCA0589S0101	CCA0601S0086	CCA0520S0161	CCA0552S0141	CCA0595S0133
CCA0582S0065	CCA0597S0188	CCA0566S0030	CCA0546S0207	CCA0549S0133	CCA0565S0104	CCA0623S0028	CCA0589S0133	CCA0601S0090	CCA0520S0181	CCA0552S0144	CCA0597S0004
CCA0582S0077	CCA0597S0200	CCA0566S0039	CCA0546S0209	CCA0552S0013	CCA0565S0105	CCA0623S0031	CCA0589S0143	CCA0605S0012	CCA0520S0182	CCA0552S0167	CCA0597S0012
CCA0582S0086	CCA0597S0213	CCA0566S0042	CCA0546S0216	CCA0552S0093	CCA0566S0011	CCA0623S0041	CCA0589S0144	CCA0605S0050	CCA0520S0196	CCA0552S0177	CCA0597S0017
CCA0582S0090	CCA0598S0012	CCA0566S0045	CCA0546S0217	CCA0552S0096	CCA0566S0015	CCA0623S0045	CCA0589S0148	CCA0605S0085	CCA0520S0197	CCA0552S0187	CCA0597S0042
CCA0582S0091	CCA0598S0063	CCA0566S0059	CCA0546S0219	CCA0552S0110	CCA0566S0027	CCA0623S0046	CCA0589S0151	CCA0607S0015	CCA0520S0223	CCA0552S0189	CCA0597S0091
CCA0582S0098	CCA0598S0089	CCA0566S0087	CCA0546S0239	CCA0552S0117	CCA0566S0028	CCA0623S0068	CCA0589S0152	CCA0607S0029	CCA0520S0234	CCA0552S0206	CCA0597S0093
CCA0582S0124	CCA0598S0098	CCA0566S0100	CCA0546S0254	CCA0552S0128	CCA0566S0050	CCA0623S0072	CCA0589S0174	CCA0607S0050	CCA0520S0239	CCA0552S0208	CCA0597S0094
CCA0583S0043	CCA0598S0102	CCA0566S0103	CCA0546S0273	CCA0552S0153	CCA0566S0054	CCA0623S0082	CCA0589S0186	CCA0610S0052	CCA0520S0245	CCA0552S0210	CCA0597S0096
CCA0583S0079	CCA0600S0004	CCA0566S0152	CCA0546S0283	CCA0552S0179	CCA0566S0060	CCA0623S0110	CCA0589S0211	CCA0613S0054	CCA0520S0257	CCA0552S0218	CCA0597S0201
CCA0583S0090	CCA0601S0100	CCA0567S0002	CCA0546S0304	CCA0552S0219	CCA0566S0077	CCA0623S0111	CCA0589S0236	CCA0613S0077	CCA0522S0011	CCA0552S0224	CCA0598S0068
CCA0583S0102	CCA0605S0005	CCA0568S0074	CCA0549S0028	CCA0552S0222	CCA0566S0083	CCA0623S0138	CCA0591S0047	CCA0613S0083	CCA0522S0018	CCA0552S0225	CCA0598S0093
CCA0583S0108	CCA0605S0030	CCA0573S0030	CCA0549S0032	CCA0552S0239	CCA0566S0092	CCA0623S0141	CCA0591S0053	CCA0616S0035	CCA0522S0029	CCA0552S0229	CCA0601S0022
CCA0587S0003	CCA0605S0034	CCA0573S0070	CCA0549S0050	CCA0552S0256	CCA0566S0093	CCA0627S0043	CCA0591S0139	CCA0616S0114	CCA0522S0032	CCA0552S0240	CCA0601S0053
CCA0587S0007	CCA0605S0083	CCA0573S0092	CCA0549S0055	CCA0552S0280	CCA0566S0094	CCA0627S0046	CCA0595S0030	CCA0616S0164	CCA0522S0034	CCA0552S0260	CCA0601S0105
CCA0587S0016	CCA0605S0088	CCA0573S0107	CCA0549S0071	CCA0555S0019	CCA0566S0110	CCA0627S0049	CCA0595S0069	CCA0620S0009	CCA0522S0044	CCA0552S0272	CCA0601S0107
CCA0587S0029	CCA0607S0025	CCA0573S0120	CCA0549S0074	CCA0555S0024	CCA0566S0125	CCA0627S0052	CCA0595S0073	CCA0620S0017	CCA0522S0048	CCA0552S0281	CCA0605S0010
CCA0587S0049	CCA0607S0076	CCA0573S0124	CCA0549S0075	CCA0555S0072	CCA0566S0141	CCA0628S0005	CCA0595S0076	CCA0623S0012	CCA0522S0051	CCA0555S0023	CCA0605S0025
CCA0587S0052	CCA0607S0078	CCA0573S0126	CCA0549S0081	CCA0555S0073	CCA0566S0145	CCA0628S0010	CCA0595S0090	CCA0623S0055	CCA0522S0059	CCA0555S0041	CCA0605S0065
CCA0587S0053	CCA0610S0011	CCA0573S0131	CCA0549S0139	CCA0555S0076	CCA0566S0156	CCA0628S0056	CCA0595S0093	CCA0623S0086	CCA0522S0088	CCA0555S0045	CCA0605S0070
CCA0587S0068	CCA0613S0003	CCA0573S0142	CCA0551S0002	CCA0555S0092	CCA0566S0165	CCA0632S0023	CCA0595S0110	CCA0623S0140	CCA0522S0093	CCA0555S0051	CCA0605S0074
CCA0587S0070	CCA0615S0001	CCA0573S0154	CCA0552S0071	CCA0555S0123	CCA0566S0172	CCA0632S0030	CCA0595S0114	CCA0623S0147	CCA0522S0101	CCA0555S0069	CCA0605S0087
CCA0587S0077	CCA0616S0038	CCA0573S0189	CCA0552S0086	CCA0555S0144	CCA0568S0009	CCA0632S0061	CCA0595S0129	CCA0628S0015	CCA0522S0112	CCA0555S0081	CCA0607S0006
CCA0587S0092	CCA0616S0040	CCA0573S0195	CCA0552S0145	CCA0555S0171	CCA0568S0020	CCA0632S0090	CCA0595S0148	CCA0628S0030	CCA0522S0113	CCA0555S0083	CCA0607S0008
CCA0587S0093	CCA0616S0043	CCA0576S0005	CCA0552S0148	CCA0555S0200	CCA0568S0062	CCA0632S0096	CCA0597S0031	CCA0628S0043	CCA0522S0144	CCA0555S0084	CCA0607S0041
CCA0587S0097	CCA0616S0045	CCA0576S0006	CCA0552S0151	CCA0555S0201	CCA0573S0006	CCA0632S0105	CCA0597S0046	CCA0628S0066	CCA0522S0156	CCA0555S0087	CCA0607S0053
CCA0587S0113	CCA0616S0070	CCA0576S0049	CCA0552S0152	CCA0555S0207	CCA0573S0022	CCA0632S0106	CCA0597S0048	CCA0628S0078	CCA0522S0172	CCA0555S0118	CCA0610S0043
CCA0587S0139	CCA0616S0087	CCA0576S0054	CCA0552S0165	CCA0555S0245	CCA0573S0043	CCA0632S0154	CCA0597S0053	CCA0631S0001	CCA0522S0195	CCA0555S0119	CCA0613S0041
CCA0587S0144	CCA0616S0089	CCA0576S0075	CCA0552S0168	CCA0555S0247	CCA0573S0091	CCA0633S0025	CCA0597S0074	CCA0632S0005	CCA0522S0201	CCA0555S0132	CCA0616S0065
CCA0587S0152	CCA0616S0109	CCA0576S0081	CCA0552S0182	CCA0559S0012	CCA0573S0095	CCA0633S0057	CCA0597S0079	CCA0632S0007	CCA0522S0204	CCA0555S0147	CCA0616S0150
CCA0589S0023	CCA0616S0116	CCA0576S0091	CCA0552S0190	CCA0559S0052	CCA0573S0116	CCA0633S0089	CCA0597S0084	CCA0632S0025	CCA0522S0206	CCA0555S0169	CCA0616S0151
CCA0589S0032	CCA0616S0126	CCA0576S0094	CCA0552S0193	CCA0559S0109	CCA0573S0133	CCA0634S0008	CCA0597S0089	CCA0632S0050	CCA0522S0207	CCA0555S0172	CCA0616S0153
CCA0589S0041	CCA0616S0168	CCA0576S0110	CCA0552S0202	CCA0559S0111	CCA0573S0139	CCA0634S0023	CCA0597S0101	CCA0632S0063	CCA0522S0210	CCA0555S0191	CCA0616S0156
CCA0589S0065	CCA0618S0001	CCA0576S0126	CCA0552S0220	CCA0559S0118	CCA0573S0151	CCA0634S0053	CCA0597S0121	CCA0632S0064	CCA0522S0242	CCA0555S0213	CCA0616S0167
CCA0589S0093	CCA0620S0032	CCA0576S0134	CCA0552S0275	CCA0559S0128	CCA0573S0152	CCA0634S0070	CCA0597S0130	CCA0632S0097	CCA0522S0249	CCA0555S0229	CCA0621S0001
CCA0589S0122	CCA0623S0016	CCA0576S0154	CCA0555S0006	CCA0559S0162	CCA0573S0185	CCA0634S0074	CCA0597S0148	CCA0632S0118	CCA0522S0260	CCA0555S0231	CCA0623S0018
CCA0589S0138	CCA0623S0040	CCA0576S0160	CCA0555S0013	CCA0563S0037	CCA0573S0186	CCA0634S0085	CCA0597S0151	CCA0632S0133	CCA0522S0279	CCA0555S0256	CCA0623S0027
CCA0589S0161	CCA0623S0056	CCA0576S0176	CCA0555S0015	CCA0563S0045	CCA0573S0193	CCA0638S0035	CCA0597S0186	CCA0632S0181	CCA0524S0007	CCA0555S0259	CCA0623S0052
CCA0589S0170	CCA0623S0065	CCA0576S0190	CCA0555S0033	CCA0563S0064	CCA0573S0196	CCA0638S0055	CCA0597S0203	CCA0632S0189	CCA0524S0010	CCA0558S0001	CCA0623S0063
CCA0589S0189	CCA0623S0083	CCA0576S0222	CCA0555S0036	CCA0563S0092	CCA0576S0029	CCA0638S0064	CCA0597S0204	CCA0633S0059	CCA0524S0021	CCA0559S0031	CCA0623S0074
CCA0589S0203	CCA0623S0089	CCA0576S0225	CCA0555S0047	CCA0565S0042	CCA0576S0030	CCA0638S0084	CCA0598S0003	CCA0633S0063	CCA0524S0043	CCA0559S0048	CCA0623S0131
CCA0589S0204	CCA0623S0098	CCA0576S0230	CCA0555S0061	CCA0565S0043	CCA0576S0038	CCA0638S0085	CCA0598S0061	CCA0633S0064	CCA0524S0065	CCA0559S0077	CCA0627S0040
CCA0589S0205	CCA0623S0117	CCA0576S0245	CCA0555S0063	CCA0565S0060	CCA0576S0055	CCA0638S0087	CCA0598S0071	CCA0633S0085	CCA0524S0091	CCA0559S0098	CCA0627S0041
CCA0589S0226	CCA0623S0124	CCA0576S0250	CCA0555S0067	CCA0565S0075	CCA0576S0064	CCA0638S0089	CCA0598S0121	CCA0634S0003	CCA0524S0093	CCA0559S0105	CCA0627S0047
CCA0589S0240	CCA0627S0067	CCA0576S0258	CCA0555S0095	CCA0565S0101	CCA0576S0065	CCA0638S0093	CCA0598S0122	CCA0634S0043	CCA0524S0111	CCA0559S0107	CCA0627S0069
CCA0591S0017	CCA0628S0069	CCA0578S0011	CCA0555S0111	CCA0565S0112	CCA0576S0083	CCA0638S0099	CCA0601S0007	CCA0634S0111	CCA0524S0124	CCA0559S0115	CCA0628S0018
CCA0591S0024	CCA0628S0071	CCA0578S0022	CCA0555S0112	CCA0566S0057	CCA0576S0124	CCA0638S0111	CCA0601S0020	CCA0634S0113	CCA0524S0132	CCA0563S0009	CCA0628S0045
CCA0591S0091	CCA0628S0075	CCA0578S0047	CCA0555S0122	CCA0566S0063	CCA0576S0130	CCA0638S0118	CCA0601S0028	CCA0638S0009	CCA0524S0138	CCA0563S0033	CCA0628S0048
CCA0591S0116	CCA0628S0077	CCA0578S0049	CCA0555S0185	CCA0566S0113	CCA0576S0141	CCA0638S0131	CCA0601S0030	CCA0638S0026	CCA0524S0139	CCA0563S0044	CCA0628S0081
CCA0591S0142	CCA0628S0080	CCA0578S0060	CCA0555S0198	CCA0566S0115	CCA0576S0142	CCA0638S0135	CCA0601S0031	CCA0638S0050	CCA0524S0140	CCA0565S0040	CCA0632S0011
CCA0595S0094	CCA0632S0093	CCA0578S0063	CCA0555S0212	CCA0566S0121	CCA0576S0158	CCA0638S0138	CCA0601S0046	CCA0638S0075	CCA0524S0150	CCA0565S0044	CCA0632S0020
CCA0595S0101	CCA0632S0099	CCA0578S0078	CCA0555S0232	CCA0566S0179	CCA0576S0163	CCA0638S0150	CCA0601S0048	CCA0638S0078	CCA0524S0165	CCA0565S0052	CCA0632S0022
CCA0595S0116	CCA0632S0193	CCA0578S0095	CCA0559S0007	CCA0566S0183	CCA0576S0169	CCA0638S0167	CCA0601S0075	CCA0638S0109	CCA0524S0180	CCA0565S0054	CCA0632S0033
CCA0597S0010	CCA0633S0051	CCA0578S0098	CCA0559S0027	CCA0568S0006	CCA0576S0173	CCA0638S0194	CCA0601S0078	CCA0638S0141	CCA0524S0195	CCA0565S0063	CCA0632S0067
CCA0597S0015	CCA0633S0069	CCA0578S0101	CCA0559S0045	CCA0568S0049	CCA0576S0187	CCA0642S0007	CCA0601S0102	CCA0638S0163	CCA0524S0196	CCA0565S0073	CCA0632S0080
CCA0597S0049	CCA0633S0070	CCA0578S0111	CCA0559S0046	CCA0568S0053	CCA0576S0193	CCA0642S0009	CCA0601S0110	CCA0638S0174	CCA0524S0228	CCA0565S0076	CCA0632S0087
CCA0597S0051	CCA0633S0072	CCA0578S0116	CCA0559S0047	CCA0568S0060	CCA0576S0198	CCA0642S0021	CCA0601S0121	CCA0638S0218	CCA0524S0237	CCA0565S0121	CCA0632S0117
CCA0597S0056	CCA0633S0080	CCA0578S0134	CCA0559S0062	CCA0568S0067	CCA0576S0231	CCA0642S0028	CCA0604S0001	CCA0642S0018	CCA0524S0254	CCA0566S0020	CCA0632S0168
CCA0597S0068	CCA0633S0083	CCA0578S0149	CCA0559S0078	CCA0568S0076	CCA0576S0232	CCA0642S0077	CCA0605S0029	CCA0642S0024	CCA0524S0256	CCA0566S0031	CCA0633S0036
CCA0597S0095	CCA0633S0097	CCA0578S0158	CCA0559S0106	CCA0573S0039	CCA0576S0233	CCA0642S0125	CCA0605S0049	CCA0642S0041	CCA0524S0289	CCA0566S0037	CCA0633S0074
CCA0597S0120	CCA0634S0040	CCA0582S0021	CCA0559S0120	CCA0573S0125	CCA0576S0270	CCA0642S0126	CCA0605S0054	CCA0642S0081	CCA0524S0291	CCA0566S0040	CCA0633S0082
CCA0597S0164	CCA0634S0041	CCA0582S0032	CCA0559S0163	CCA0575S0003	CCA0578S0006	CCA0642S0144	CCA0605S0062	CCA0642S0100	CCA0524S0303	CCA0566S0052	CCA0633S0092
CCA0597S0166	CCA0634S0051	CCA0582S0052	CCA0563S0039	CCA0576S0004	CCA0578S0007	CCA0642S0159	CCA0605S0064	CCA0642S0128	CCA0524S0315	CCA0566S0109	CCA0633S0100
CCA0597S0193	CCA0634S0090	CCA0582S0053	CCA0563S0075	CCA0576S0007	CCA0578S0013	CCA0646S0003	CCA0605S0069	CCA0642S0129	CCA0524S0334	CCA0566S0114	CCA0633S0104
CCA0597S0207	CCA0634S0092	CCA0582S0055	CCA0565S0038	CCA0576S0057	CCA0578S0015	CCA0646S0010	CCA0605S0082	CCA0642S0140	CCA0524S0337	CCA0566S0124	CCA0634S0014
CCA0597S0212	CCA0634S0100	CCA0582S0066	CCA0565S0045	CCA0576S0072	CCA0578S0045	CCA0646S0028	CCA0605S0106	CCA0642S0147	CCA0524S0350	CCA0566S0153	CCA0634S0034
CCA0598S0030	CCA0634S0118	CCA0582S0092	CCA0565S0078	CCA0576S0116	CCA0578S0048	CCA0646S0039	CCA0605S0107	CCA0646S0046	CCA0525S0023	CCA0566S0159	CCA0634S0066
CCA0598S0049	CCA0638S0020	CCA0582S0095	CCA0565S0088	CCA0576S0121	CCA0578S0052	CCA0646S0070	CCA0607S0034	CCA0646S0048	CCA0525S0049	CCA0566S0160	CCA0634S0107
CCA0598S0084	CCA0638S0021	CCA0582S0123	CCA0565S0116	CCA0576S0127	CCA0578S0065	CCA0646S0088	CCA0607S0051	CCA0646S0089	CCA0525S0052	CCA0566S0176	CCA0634S0134
CCA0598S0086	CCA0638S0059	CCA0582S0136	CCA0566S0048	CCA0576S0131	CCA0578S0087	CCA0646S0121	CCA0607S0056	CCA0646S0110	CCA0525S0068	CCA0568S0019	CCA0634S0135
CCA0598S0087	CCA0638S0060	CCA0582S0144	CCA0566S0056	CCA0576S0152	CCA0578S0091	CCA0646S0127	CCA0607S0074	CCA0646S0112	CCA0525S0069	CCA0568S0023	CCA0638S0031
CCA0598S0126	CCA0638S0067	CCA0582S0149	CCA0566S0064	CCA0576S0157	CCA0578S0093	CCA0646S0158	CCA0607S0089	CCA0646S0116	CCA0525S0075	CCA0568S0029	CCA0638S0066
CCA0598S0129	CCA0638S0068	CCA0583S0001	CCA0566S0065	CCA0576S0165	CCA0578S0094	CCA0646S0159	CCA0610S0041	CCA0646S0130	CCA0525S0079	CCA0568S0030	CCA0638S0113
CCA0601S0006	CCA0638S0128	CCA0583S0014	CCA0566S0067	CCA0576S0178	CCA0578S0099	CCA0646S0163	CCA0613S0004	CCA0646S0154	CCA0525S0091	CCA0568S0039	CCA0638S0146
CCA0601S0014	CCA0638S0172	CCA0583S0022	CCA0566S0081	CCA0576S0182	CCA0578S0103	CCA0646S0173	CCA0613S0005	CCA0646S0157	CCA0525S0093	CCA0568S0054	CCA0638S0148
CCA0601S0039	CCA0638S0177	CCA0583S0072	CCA0566S0106	CCA0576S0195	CCA0578S0115	CCA0649S0036	CCA0613S0008	CCA0649S0050	CCA0525S0095	CCA0568S0070	CCA0638S0149
CCA0601S0051	CCA0638S0178	CCA0583S0077	CCA0566S0146	CCA0576S0203	CCA0582S0004	CCA0649S0051	CCA0613S0013	CCA0649S0076	CCA0525S0111	CCA0568S0075	CCA0638S0162
CCA0601S0072	CCA0638S0209	CCA0583S0086	CCA0566S0150	CCA0576S0219	CCA0582S0011	CCA0652S0005	CCA0613S0029	CCA0649S0080	CCA0525S0112	CCA0568S0081	CCA0638S0176
CCA0601S0095	CCA0642S0016	CCA0583S0088	CCA0566S0164	CCA0576S0236	CCA0582S0015	CCA0652S0013	CCA0613S0045	CCA0649S0087	CCA0525S0115	CCA0570S0002	CCA0638S0182
CCA0601S0104	CCA0642S0073	CCA0583S0111	CCA0566S0181	CCA0576S0239	CCA0582S0081	CCA0652S0037	CCA0613S0051	CCA0649S0104	CCA0525S0136	CCA0573S0026	CCA0638S0187
CCA0601S0112	CCA0642S0099	CCA0587S0005	CCA0566S0182	CCA0576S0242	CCA0582S0087	CCA0652S0052	CCA0613S0075	CCA0652S0001	CCA0525S0157	CCA0573S0037	CCA0638S0191
CCA0605S0093	CCA0642S0105	CCA0587S0010	CCA0566S0185	CCA0576S0251	CCA0582S0099	CCA0652S0061	CCA0616S0008	CCA0652S0016	CCA0525S0158	CCA0573S0079	CCA0638S0197
CCA0605S0115	CCA0642S0106	CCA0587S0012	CCA0566S0186	CCA0576S0256	CCA0582S0106	CCA0652S0083	CCA0616S0034	CCA0652S0022	CCA0525S0166	CCA0573S0094	CCA0638S0200
CCA0605S0117	CCA0642S0115	CCA0587S0031	CCA0568S0010	CCA0576S0259	CCA0582S0117	CCA0652S0103	CCA0616S0039	CCA0652S0053	CCA0525S0174	CCA0573S0123	CCA0638S0210
CCA0605S0121	CCA0642S0139	CCA0587S0055	CCA0568S0018	CCA0576S0268	CCA0582S0119	CCA0652S0124	CCA0616S0046	CCA0652S0058	CCA0525S0178	CCA0573S0134	CCA0641S0001
CCA0607S0011	CCA0642S0177	CCA0587S0069	CCA0568S0061	CCA0576S0269	CCA0582S0126	CCA0654S0026	CCA0616S0094	CCA0652S0096	CCA0525S0201	CCA0573S0137	CCA0642S0011
CCA0607S0019	CCA0646S0007	CCA0587S0084	CCA0568S0063	CCA0576S0273	CCA0582S0129	CCA0654S0028	CCA0616S0103	CCA0652S0102	CCA0526S0001	CCA0573S0171	CCA0642S0015
CCA0607S0028	CCA0646S0036	CCA0587S0086	CCA0573S0015	CCA0578S0058	CCA0582S0146	CCA0654S0029	CCA0616S0112	CCA0652S0105	CCA0526S0006	CCA0573S0173	CCA0642S0026
CCA0607S0042	CCA0646S0051	CCA0587S0087	CCA0573S0040	CCA0578S0066	CCA0582S0151	CCA0654S0059	CCA0616S0140	CCA0652S0106	CCA0526S0010	CCA0573S0180	CCA0642S0051
CCA0607S0048	CCA0646S0054	CCA0587S0104	CCA0573S0045	CCA0578S0079	CCA0582S0173	CCA0654S0077	CCA0616S0142	CCA0652S0107	CCA0526S0011	CCA0573S0201	CCA0642S0059
CCA0607S0061	CCA0646S0057	CCA0587S0111	CCA0573S0048	CCA0578S0110	CCA0582S0180	CCA0654S0081	CCA0620S0021	CCA0654S0015	CCA0526S0036	CCA0573S0203	CCA0642S0060
CCA0607S0080	CCA0646S0077	CCA0587S0119	CCA0573S0062	CCA0578S0136	CCA0582S0187	CCA0656S0006	CCA0620S0026	CCA0654S0046	CCA0526S0043	CCA0576S0012	CCA0642S0065
CCA0610S0019	CCA0646S0101	CCA0587S0123	CCA0573S0063	CCA0578S0139	CCA0583S0028	CCA0656S0041	CCA0623S0002	CCA0654S0083	CCA0526S0050	CCA0576S0017	CCA0642S0066
CCA0610S0032	CCA0646S0175	CCA0587S0135	CCA0573S0083	CCA0578S0150	CCA0583S0041	CCA0656S0047	CCA0623S0006	CCA0654S0084	CCA0526S0079	CCA0576S0039	CCA0642S0071
CCA0610S0044	CCA0649S0026	CCA0587S0191	CCA0573S0150	CCA0579S0005	CCA0583S0053	CCA0656S0058	CCA0623S0014	CCA0656S0029	CCA0526S0112	CCA0576S0052	CCA0642S0072
CCA0610S0055	CCA0649S0039	CCA0589S0047	CCA0573S0153	CCA0582S0026	CCA0583S0067	CCA0656S0083	CCA0623S0025	CCA0656S0076	CCA0526S0131	CCA0576S0056	CCA0642S0119
CCA0613S0038	CCA0649S0099	CCA0589S0049	CCA0573S0188	CCA0582S0030	CCA0583S0071	CCA0656S0100	CCA0623S0054	CCA0656S0082	CCA0526S0158	CCA0576S0070	CCA0642S0120
CCA0613S0055	CCA0652S0002	CCA0589S0050	CCA0574S0001	CCA0582S0040	CCA0583S0106	CCA0659S0007	CCA0623S0061	CCA0656S0092	CCA0526S0164	CCA0576S0085	CCA0642S0123
CCA0613S0085	CCA0652S0020	CCA0589S0051	CCA0575S0005	CCA0582S0050	CCA0587S0009	CCA0659S0013	CCA0623S0094	CCA0656S0096	CCA0526S0188	CCA0576S0107	CCA0642S0149
CCA0616S0026	CCA0652S0024	CCA0589S0072	CCA0576S0028	CCA0582S0062	CCA0587S0014	CCA0659S0078	CCA0623S0103	CCA0658S0001	CCA0526S0217	CCA0576S0111	CCA0646S0128
CCA0616S0080	CCA0652S0039	CCA0589S0074	CCA0576S0062	CCA0582S0067	CCA0587S0099	CCA0659S0146	CCA0623S0116	CCA0659S0004	CCA0526S0218	CCA0576S0113	CCA0646S0132
CCA0616S0099	CCA0652S0050	CCA0589S0087	CCA0576S0063	CCA0582S0071	CCA0587S0108	CCA0659S0169	CCA0623S0118	CCA0659S0049	CCA0526S0225	CCA0576S0174	CCA0646S0142
CCA0616S0115	CCA0652S0094	CCA0589S0094	CCA0576S0090	CCA0582S0076	CCA0587S0140	CCA0659S0174	CCA0623S0127	CCA0659S0050	CCA0526S0240	CCA0576S0177	CCA0646S0147
CCA0616S0118	CCA0652S0100	CCA0589S0097	CCA0576S0114	CCA0582S0079	CCA0587S0170	CCA0659S0176	CCA0623S0132	CCA0659S0059	CCA0526S0248	CCA0576S0186	CCA0646S0150
CCA0616S0121	CCA0652S0101	CCA0589S0107	CCA0576S0161	CCA0582S0080	CCA0587S0178	CCA0659S0199	CCA0623S0154	CCA0659S0062	CCA0526S0249	CCA0576S0210	CCA0646S0161
CCA0616S0134	CCA0654S0003	CCA0589S0123	CCA0576S0175	CCA0582S0083	CCA0587S0204	CCA0659S0217	CCA0623S0155	CCA0659S0074	CCA0526S0256	CCA0576S0211	CCA0646S0170
CCA0620S0027	CCA0654S0005	CCA0589S0135	CCA0576S0180	CCA0582S0093	CCA0589S0019	CCA0659S0232	CCA0627S0019	CCA0659S0085	CCA0526S0290	CCA0576S0226	CCA0649S0066
CCA0623S0053	CCA0654S0038	CCA0589S0136	CCA0576S0184	CCA0582S0115	CCA0589S0022	CCA0659S0237	CCA0627S0020	CCA0659S0094	CCA0526S0299	CCA0576S0267	CCA0649S0077
CCA0623S0062	CCA0654S0051	CCA0589S0154	CCA0576S0185	CCA0582S0116	CCA0589S0045	CCA0659S0254	CCA0627S0025	CCA0659S0103	CCA0526S0316	CCA0576S0271	CCA0649S0084
CCA0623S0085	CCA0656S0011	CCA0589S0155	CCA0576S0188	CCA0582S0133	CCA0589S0066	CCA0659S0256	CCA0627S0061	CCA0659S0111	CCA0526S0318	CCA0576S0276	CCA0649S0086
CCA0623S0107	CCA0656S0043	CCA0589S0157	CCA0576S0202	CCA0582S0135	CCA0589S0075	CCA0662S0002	CCA0628S0070	CCA0659S0115	CCA0526S0319	CCA0578S0043	CCA0652S0025
CCA0623S0109	CCA0656S0105	CCA0589S0160	CCA0576S0274	CCA0582S0141	CCA0589S0080	CCA0662S0008	CCA0632S0014	CCA0659S0137	CCA0526S0329	CCA0578S0044	CCA0652S0028
CCA0623S0136	CCA0659S0069	CCA0589S0163	CCA0577S0002	CCA0582S0184	CCA0589S0081	CCA0662S0033	CCA0632S0029	CCA0659S0213	CCA0526S0336	CCA0578S0061	CCA0652S0034
CCA0624S0001	CCA0659S0075	CCA0589S0192	CCA0578S0010	CCA0583S0018	CCA0589S0086	CCA0662S0055	CCA0632S0032	CCA0659S0240	CCA0526S0344	CCA0578S0062	CCA0652S0079
CCA0627S0017	CCA0659S0092	CCA0589S0199	CCA0578S0019	CCA0583S0020	CCA0589S0091	CCA0662S0116	CCA0632S0039	CCA0662S0096	CCA0526S0348	CCA0578S0075	CCA0652S0097
CCA0627S0064	CCA0659S0095	CCA0589S0209	CCA0578S0027	CCA0583S0051	CCA0589S0102	CCA0662S0124	CCA0632S0057	CCA0662S0099	CCA0529S0005	CCA0578S0084	CCA0652S0099
CCA0627S0065	CCA0659S0101	CCA0589S0233	CCA0578S0046	CCA0583S0078	CCA0589S0112	CCA0662S0154	CCA0632S0060	CCA0662S0131	CCA0529S0008	CCA0578S0135	CCA0652S0114
CCA0628S0023	CCA0659S0179	CCA0589S0252	CCA0578S0082	CCA0587S0020	CCA0589S0116	CCA0665S0008	CCA0632S0062	CCA0662S0153	CCA0529S0012	CCA0578S0160	CCA0654S0030
CCA0628S0025	CCA0659S0191	CCA0591S0048	CCA0578S0105	CCA0587S0042	CCA0589S0129	CCA0665S0025	CCA0632S0070	CCA0665S0014	CCA0529S0023	CCA0579S0001	CCA0654S0052
CCA0628S0042	CCA0659S0205	CCA0595S0007	CCA0578S0109	CCA0587S0062	CCA0589S0131	CCA0665S0044	CCA0632S0155	CCA0665S0030	CCA0529S0026	CCA0579S0007	CCA0654S0073
CCA0628S0064	CCA0659S0243	CCA0595S0013	CCA0578S0125	CCA0587S0074	CCA0589S0140	CCA0665S0045	CCA0632S0174	CCA0665S0048	CCA0529S0030	CCA0581S0001	CCA0656S0012
CCA0628S0072	CCA0659S0246	CCA0595S0026	CCA0578S0144	CCA0587S0105	CCA0589S0165	CCA0665S0047	CCA0632S0178	CCA0666S0001	CCA0529S0048	CCA0582S0039	CCA0656S0021
CCA0628S0079	CCA0662S0030	CCA0595S0032	CCA0578S0155	CCA0587S0150	CCA0589S0166	CCA0669S0009	CCA0633S0018	CCA0670S0043	CCA0529S0056	CCA0582S0044	CCA0656S0022
CCA0631S0002	CCA0662S0090	CCA0595S0035	CCA0582S0003	CCA0587S0151	CCA0589S0168	CCA0670S0021	CCA0633S0028	CCA0670S0050	CCA0529S0057	CCA0582S0070	CCA0656S0051
CCA0632S0044	CCA0662S0104	CCA0595S0038	CCA0582S0016	CCA0587S0157	CCA0589S0172	CCA0670S0026	CCA0633S0032	CCA0670S0051	CCA0529S0059	CCA0582S0082	CCA0656S0072
CCA0632S0045	CCA0662S0109	CCA0595S0052	CCA0582S0018	CCA0587S0187	CCA0589S0173	CCA0670S0040	CCA0633S0049	CCA0670S0062	CCA0529S0062	CCA0582S0097	CCA0656S0074
CCA0632S0049	CCA0662S0111	CCA0595S0068	CCA0582S0041	CCA0587S0188	CCA0589S0184	CCA0670S0049	CCA0633S0065	CCA0670S0071	CCA0529S0090	CCA0582S0104	CCA0656S0080
CCA0632S0065	CCA0662S0117	CCA0595S0104	CCA0582S0051	CCA0587S0192	CCA0589S0190	CCA0670S0069	CCA0633S0066	CCA0670S0078	CCA0533S0029	CCA0582S0105	CCA0656S0093
CCA0632S0081	CCA0662S0133	CCA0595S0108	CCA0582S0054	CCA0587S0198	CCA0589S0191	CCA0670S0070	CCA0633S0077	CCA0670S0084	CCA0533S0031	CCA0582S0109	CCA0658S0003
CCA0632S0116	CCA0662S0146	CCA0595S0111	CCA0582S0075	CCA0587S0210	CCA0589S0201	CCA0670S0076	CCA0633S0103	CCA0670S0094	CCA0533S0036	CCA0582S0111	CCA0659S0009
CCA0632S0187	CCA0663S0001	CCA0595S0120	CCA0582S0176	CCA0589S0012	CCA0589S0202	CCA0670S0112	CCA0633S0110	CCA0670S0131	CCA0533S0054	CCA0582S0127	CCA0659S0025
CCA0633S0060	CCA0665S0007	CCA0595S0132	CCA0582S0177	CCA0589S0036	CCA0589S0215	CCA0670S0126	CCA0634S0021	CCA0670S0136	CCA0533S0065	CCA0582S0152	CCA0659S0047
CCA0633S0062	CCA0665S0011	CCA0596S0001	CCA0582S0179	CCA0589S0064	CCA0589S0216	CCA0674S0023	CCA0634S0050	CCA0670S0158	CCA0533S0074	CCA0582S0153	CCA0659S0086
CCA0633S0068	CCA0665S0068	CCA0597S0003	CCA0582S0188	CCA0589S0069	CCA0589S0218	CCA0674S0030	CCA0634S0058	CCA0674S0016	CCA0533S0119	CCA0582S0154	CCA0659S0106
CCA0633S0090	CCA0669S0001	CCA0597S0018	CCA0583S0027	CCA0589S0098	CCA0589S0237	CCA0674S0031	CCA0634S0071	CCA0674S0075	CCA0533S0123	CCA0582S0156	CCA0659S0107
CCA0634S0002	CCA0669S0003	CCA0597S0033	CCA0583S0060	CCA0589S0103	CCA0591S0020	CCA0674S0055	CCA0634S0072	CCA0674S0093	CCA0533S0126	CCA0582S0158	CCA0659S0120
CCA0634S0007	CCA0670S0001	CCA0597S0045	CCA0583S0065	CCA0589S0120	CCA0591S0033	CCA0674S0081	CCA0634S0077	CCA0674S0116	CCA0533S0137	CCA0582S0162	CCA0659S0133
CCA0634S0011	CCA0670S0007	CCA0597S0052	CCA0583S0069	CCA0589S0121	CCA0591S0054	CCA0674S0108	CCA0634S0078	CCA0674S0134	CCA0533S0138	CCA0582S0165	CCA0659S0140
CCA0634S0028	CCA0670S0015	CCA0597S0060	CCA0583S0083	CCA0589S0127	CCA0591S0098	CCA0674S0115	CCA0634S0079	CCA0674S0168	CCA0533S0151	CCA0582S0167	CCA0659S0160
CCA0634S0054	CCA0670S0017	CCA0597S0076	CCA0583S0099	CCA0589S0130	CCA0591S0127	CCA0674S0130	CCA0638S0010	CCA0674S0170	CCA0533S0166	CCA0582S0170	CCA0659S0177
CCA0634S0115	CCA0670S0038	CCA0597S0083	CCA0583S0100	CCA0589S0147	CCA0595S0039	CCA0674S0139	CCA0638S0012	CCA0676S0005	CCA0533S0179	CCA0583S0039	CCA0659S0190
CCA0634S0117	CCA0670S0061	CCA0597S0090	CCA0583S0120	CCA0589S0149	CCA0595S0046	CCA0674S0147	CCA0638S0027	CCA0676S0014	CCA0533S0184	CCA0583S0040	CCA0659S0214
CCA0634S0120	CCA0670S0077	CCA0597S0097	CCA0587S0015	CCA0589S0153	CCA0595S0048	CCA0674S0178	CCA0638S0029	CCA0676S0031	CCA0533S0204	CCA0583S0049	CCA0659S0216
CCA0635S0001	CCA0670S0102	CCA0597S0126	CCA0587S0041	CCA0589S0169	CCA0595S0063	CCA0674S0189	CCA0638S0047	CCA0676S0042	CCA0533S0218	CCA0583S0066	CCA0659S0247
CCA0638S0013	CCA0670S0144	CCA0597S0129	CCA0587S0079	CCA0589S0175	CCA0595S0098	CCA0674S0210	CCA0638S0151	CCA0676S0044	CCA0533S0224	CCA0583S0082	CCA0662S0006
CCA0638S0022	CCA0674S0003	CCA0597S0131	CCA0587S0179	CCA0589S0179	CCA0595S0100	CCA0676S0007	CCA0638S0175	CCA0676S0060	CCA0533S0226	CCA0583S0085	CCA0662S0020
CCA0638S0048	CCA0674S0146	CCA0597S0175	CCA0587S0202	CCA0589S0193	CCA0595S0106	CCA0676S0055	CCA0638S0189	CCA0676S0072	CCA0533S0229	CCA0587S0025	CCA0662S0037
CCA0638S0073	CCA0674S0150	CCA0597S0177	CCA0588S0001	CCA0589S0206	CCA0595S0126	CCA0676S0059	CCA0638S0192	CCA0676S0074	CCA0533S0239	CCA0587S0032	CCA0662S0038
CCA0638S0107	CCA0674S0164	CCA0597S0192	CCA0589S0030	CCA0589S0213	CCA0595S0130	CCA0676S0063	CCA0638S0204	CCA0676S0075	CCA0533S0241	CCA0587S0033	CCA0662S0047
CCA0638S0116	CCA0674S0167	CCA0597S0194	CCA0589S0038	CCA0589S0222	CCA0595S0131	CCA0676S0092	CCA0638S0212	CCA0676S0080	CCA0533S0254	CCA0587S0043	CCA0662S0062
CCA0638S0139	CCA0674S0169	CCA0597S0195	CCA0589S0039	CCA0589S0234	CCA0595S0141	CCA0676S0118	CCA0638S0213	CCA0676S0096	CCA0535S0032	CCA0587S0046	CCA0665S0036
CCA0638S0147	CCA0674S0180	CCA0597S0210	CCA0589S0054	CCA0589S0244	CCA0597S0002	CCA0676S0122	CCA0638S0214	CCA0678S0005	CCA0535S0036	CCA0587S0047	CCA0665S0049
CCA0638S0195	CCA0674S0219	CCA0598S0007	CCA0589S0078	CCA0591S0008	CCA0597S0009	CCA0678S0041	CCA0638S0216	CCA0678S0021	CCA0535S0109	CCA0587S0059	CCA0665S0073
CCA0642S0008	CCA0676S0051	CCA0598S0014	CCA0589S0095	CCA0591S0016	CCA0597S0021	CCA0678S0046	CCA0642S0025	CCA0678S0032	CCA0535S0128	CCA0587S0061	CCA0665S0082
CCA0642S0035	CCA0678S0004	CCA0598S0015	CCA0589S0108	CCA0591S0018	CCA0597S0061	CCA0678S0057	CCA0642S0029	CCA0678S0033	CCA0539S0009	CCA0587S0071	CCA0669S0011
CCA0642S0091	CCA0678S0044	CCA0601S0024	CCA0589S0111	CCA0591S0022	CCA0597S0062	CCA0678S0072	CCA0642S0030	CCA0678S0047	CCA0539S0010	CCA0587S0072	CCA0670S0003
CCA0642S0103	CCA0678S0119	CCA0601S0064	CCA0589S0115	CCA0591S0146	CCA0597S0071	CCA0678S0084	CCA0642S0042	CCA0678S0051	CCA0539S0023	CCA0587S0076	CCA0670S0006
CCA0646S0005	CCA0678S0123	CCA0601S0080	CCA0589S0117	CCA0595S0041	CCA0597S0102	CCA0678S0126	CCA0642S0044	CCA0678S0079	CCA0539S0036	CCA0587S0080	CCA0670S0018
CCA0646S0021	CCA0678S0146	CCA0601S0101	CCA0589S0118	CCA0595S0061	CCA0597S0105	CCA0678S0142	CCA0642S0045	CCA0678S0125	CCA0539S0039	CCA0587S0094	CCA0670S0048
CCA0646S0047	CCA0678S0174	CCA0605S0006	CCA0589S0159	CCA0595S0067	CCA0597S0127	CCA0678S0152	CCA0642S0064	CCA0678S0170	CCA0539S0043	CCA0587S0100	CCA0670S0059
CCA0646S0081	CCA0679S0002	CCA0605S0018	CCA0589S0187	CCA0595S0074	CCA0597S0132	CCA0678S0156	CCA0642S0093	CCA0679S0069	CCA0539S0057	CCA0587S0101	CCA0670S0063
CCA0646S0109	CCA0679S0004	CCA0605S0020	CCA0589S0197	CCA0595S0091	CCA0597S0174	CCA0678S0176	CCA0642S0102	CCA0679S0148	CCA0539S0070	CCA0587S0107	CCA0670S0067
CCA0646S0113	CCA0679S0037	CCA0605S0031	CCA0589S0243	CCA0595S0109	CCA0597S0178	CCA0678S0186	CCA0642S0109	CCA0680S0036	CCA0539S0084	CCA0587S0154	CCA0670S0087
CCA0646S0139	CCA0679S0073	CCA0605S0037	CCA0589S0246	CCA0595S0127	CCA0597S0181	CCA0679S0049	CCA0642S0116	CCA0680S0060	CCA0539S0100	CCA0587S0156	CCA0670S0108
CCA0646S0144	CCA0679S0108	CCA0605S0055	CCA0589S0247	CCA0595S0134	CCA0598S0027	CCA0679S0058	CCA0642S0117	CCA0680S0064	CCA0539S0101	CCA0587S0189	CCA0670S0110
CCA0649S0037	CCA0679S0109	CCA0605S0056	CCA0591S0004	CCA0595S0137	CCA0598S0029	CCA0679S0095	CCA0642S0143	CCA0680S0069	CCA0539S0103	CCA0587S0205	CCA0670S0123
CCA0649S0044	CCA0680S0037	CCA0605S0059	CCA0591S0005	CCA0595S0140	CCA0598S0060	CCA0679S0120	CCA0642S0165	CCA0680S0074	CCA0539S0119	CCA0587S0225	CCA0670S0130
CCA0649S0056	CCA0680S0044	CCA0605S0081	CCA0591S0009	CCA0595S0150	CCA0598S0114	CCA0679S0121	CCA0646S0013	CCA0680S0113	CCA0539S0138	CCA0589S0001	CCA0674S0041
CCA0649S0074	CCA0680S0061	CCA0605S0089	CCA0591S0026	CCA0597S0016	CCA0601S0038	CCA0679S0122	CCA0646S0040	CCA0680S0135	CCA0539S0151	CCA0589S0020	CCA0674S0043
CCA0649S0098	CCA0680S0087	CCA0605S0094	CCA0591S0034	CCA0597S0019	CCA0601S0047	CCA0679S0139	CCA0646S0042	CCA0680S0150	CCA0539S0162	CCA0589S0021	CCA0674S0045
CCA0652S0023	CCA0680S0092	CCA0605S0126	CCA0591S0059	CCA0597S0020	CCA0601S0049	CCA0679S0145	CCA0646S0045	CCA0681S0004	CCA0539S0164	CCA0589S0063	CCA0674S0056
CCA0652S0044	CCA0680S0096	CCA0607S0018	CCA0595S0020	CCA0597S0063	CCA0601S0065	CCA0680S0018	CCA0646S0082	CCA0681S0018	CCA0539S0165	CCA0589S0079	CCA0674S0064
CCA0652S0074	CCA0680S0098	CCA0613S0017	CCA0595S0029	CCA0597S0064	CCA0601S0103	CCA0680S0021	CCA0646S0085	CCA0681S0057	CCA0539S0172	CCA0589S0084	CCA0674S0069
CCA0654S0060	CCA0680S0130	CCA0613S0021	CCA0595S0034	CCA0597S0078	CCA0605S0003	CCA0680S0022	CCA0646S0092	CCA0681S0058	CCA0539S0181	CCA0589S0100	CCA0674S0080
CCA0654S0074	CCA0681S0011	CCA0616S0019	CCA0595S0044	CCA0597S0087	CCA0605S0042	CCA0680S0032	CCA0646S0124	CCA0681S0064	CCA0539S0194	CCA0589S0106	CCA0674S0110
CCA0654S0078	CCA0681S0022	CCA0616S0036	CCA0595S0056	CCA0597S0098	CCA0605S0116	CCA0680S0062	CCA0646S0155	CCA0686S0079	CCA0539S0200	CCA0589S0114	CCA0674S0128
CCA0654S0090	CCA0681S0028	CCA0616S0067	CCA0595S0070	CCA0597S0134	CCA0605S0118	CCA0680S0082	CCA0646S0165	CCA0686S0082	CCA0539S0211	CCA0589S0119	CCA0674S0143
CCA0656S0007	CCA0681S0069	CCA0616S0107	CCA0595S0086	CCA0597S0153	CCA0607S0007	CCA0680S0114	CCA0646S0174	CCA0688S0014	CCA0539S0218	CCA0589S0132	CCA0674S0154
CCA0656S0014	CCA0686S0017	CCA0616S0138	CCA0595S0087	CCA0597S0159	CCA0607S0010	CCA0680S0116	CCA0646S0176	CCA0688S0060	CCA0539S0233	CCA0589S0139	CCA0674S0155
CCA0656S0025	CCA0686S0096	CCA0616S0139	CCA0595S0095	CCA0597S0176	CCA0607S0095	CCA0681S0037	CCA0649S0012	CCA0688S0098	CCA0539S0255	CCA0589S0150	CCA0674S0162
CCA0656S0039	CCA0688S0013	CCA0616S0158	CCA0595S0122	CCA0597S0179	CCA0610S0056	CCA0681S0066	CCA0649S0024	CCA0688S0099	CCA0539S0260	CCA0589S0162	CCA0674S0166
CCA0656S0042	CCA0688S0018	CCA0616S0159	CCA0597S0024	CCA0597S0180	CCA0613S0006	CCA0681S0080	CCA0649S0030	CCA0688S0100	CCA0539S0265	CCA0589S0176	CCA0674S0202
CCA0656S0055	CCA0688S0075	CCA0616S0160	CCA0597S0029	CCA0597S0209	CCA0613S0044	CCA0685S0001	CCA0649S0069	CCA0691S0003	CCA0539S0283	CCA0589S0180	CCA0674S0205
CCA0656S0061	CCA0688S0079	CCA0620S0002	CCA0597S0059	CCA0598S0016	CCA0613S0047	CCA0686S0016	CCA0649S0072	CCA0691S0015	CCA0542S0020	CCA0589S0208	CCA0676S0008
CCA0656S0077	CCA0688S0086	CCA0620S0016	CCA0597S0065	CCA0598S0069	CCA0613S0060	CCA0686S0043	CCA0649S0088	CCA0691S0016	CCA0542S0053	CCA0589S0217	CCA0676S0011
CCA0656S0081	CCA0691S0002	CCA0620S0034	CCA0597S0082	CCA0598S0085	CCA0613S0076	CCA0686S0064	CCA0649S0092	CCA0691S0028	CCA0542S0058	CCA0589S0235	CCA0676S0013
CCA0656S0085	CCA0691S0026	CCA0623S0003	CCA0597S0103	CCA0598S0125	CCA0613S0087	CCA0688S0041	CCA0652S0027	CCA0691S0054	CCA0542S0076	CCA0589S0245	CCA0676S0040
CCA0656S0095	CCA0691S0124	CCA0623S0007	CCA0597S0139	CCA0601S0016	CCA0613S0089	CCA0688S0063	CCA0652S0041	CCA0694S0036	CCA0542S0077	CCA0589S0248	CCA0676S0067
CCA0659S0006	CCA0694S0021	CCA0623S0008	CCA0597S0187	CCA0601S0021	CCA0616S0015	CCA0691S0009	CCA0652S0047	CCA0694S0047	CCA0542S0078	CCA0589S0250	CCA0678S0007
CCA0659S0032	CCA0698S0034	CCA0623S0015	CCA0597S0197	CCA0601S0025	CCA0616S0031	CCA0691S0014	CCA0652S0049	CCA0694S0052	CCA0542S0093	CCA0589S0251	CCA0678S0014
CCA0659S0035	CCA0698S0062	CCA0623S0020	CCA0598S0020	CCA0601S0032	CCA0616S0049	CCA0691S0022	CCA0652S0054	CCA0694S0054	CCA0542S0097	CCA0590S0001	CCA0678S0015
CCA0659S0038	CCA0698S0067	CCA0623S0026	CCA0598S0035	CCA0601S0050	CCA0616S0097	CCA0691S0027	CCA0652S0066	CCA0694S0065	CCA0542S0126	CCA0591S0006	CCA0678S0018
CCA0659S0040	CCA0698S0122	CCA0623S0051	CCA0598S0054	CCA0601S0066	CCA0616S0127	CCA0691S0032	CCA0652S0081	CCA0694S0080	CCA0542S0161	CCA0591S0128	CCA0678S0027
CCA0659S0054	CCA0698S0131	CCA0623S0070	CCA0598S0079	CCA0601S0106	CCA0616S0155	CCA0691S0033	CCA0652S0084	CCA0694S0085	CCA0542S0167	CCA0591S0137	CCA0678S0070
CCA0659S0057	CCA0698S0162	CCA0623S0084	CCA0598S0090	CCA0601S0108	CCA0619S0001	CCA0691S0064	CCA0652S0119	CCA0696S0003	CCA0542S0169	CCA0595S0053	CCA0678S0087
CCA0659S0064	CCA0698S0183	CCA0623S0093	CCA0598S0115	CCA0601S0122	CCA0620S0010	CCA0691S0068	CCA0652S0121	CCA0696S0042	CCA0542S0183	CCA0595S0058	CCA0678S0093
CCA0659S0066	CCA0698S0212	CCA0623S0120	CCA0598S0116	CCA0601S0126	CCA0620S0013	CCA0691S0084	CCA0652S0128	CCA0696S0043	CCA0542S0186	CCA0595S0060	CCA0678S0097
CCA0659S0110	CCA0698S0219	CCA0623S0126	CCA0601S0037	CCA0605S0033	CCA0620S0052	CCA0691S0109	CCA0654S0007	CCA0696S0049	CCA0546S0016	CCA0595S0064	CCA0678S0115
CCA0659S0149	CCA0698S0222	CCA0623S0129	CCA0601S0069	CCA0605S0036	CCA0620S0056	CCA0691S0116	CCA0654S0027	CCA0698S0049	CCA0546S0023	CCA0595S0089	CCA0678S0121
CCA0659S0195	CCA0700S0002	CCA0623S0134	CCA0601S0076	CCA0605S0043	CCA0623S0004	CCA0694S0002	CCA0654S0044	CCA0698S0078	CCA0546S0039	CCA0595S0102	CCA0678S0128
CCA0659S0206	CCA0700S0007	CCA0623S0142	CCA0601S0097	CCA0605S0046	CCA0623S0024	CCA0694S0003	CCA0654S0058	CCA0698S0101	CCA0546S0045	CCA0595S0103	CCA0679S0053
CCA0662S0031	CCA0700S0025	CCA0623S0150	CCA0605S0002	CCA0605S0086	CCA0623S0088	CCA0694S0032	CCA0654S0062	CCA0698S0148	CCA0546S0056	CCA0595S0124	CCA0679S0066
CCA0662S0057	CCA0700S0040	CCA0626S0001	CCA0605S0008	CCA0605S0096	CCA0623S0113	CCA0694S0044	CCA0654S0070	CCA0698S0161	CCA0546S0061	CCA0595S0135	CCA0679S0094
CCA0662S0083	CCA0700S0043	CCA0627S0002	CCA0605S0009	CCA0607S0039	CCA0623S0115	CCA0694S0046	CCA0654S0094	CCA0698S0164	CCA0546S0094	CCA0595S0139	CCA0679S0128
CCA0662S0087	CCA0700S0044	CCA0627S0012	CCA0605S0014	CCA0607S0044	CCA0623S0143	CCA0694S0073	CCA0656S0013	CCA0698S0172	CCA0546S0104	CCA0597S0022	CCA0679S0140
CCA0662S0110	CCA0700S0068	CCA0627S0014	CCA0605S0041	CCA0607S0049	CCA0623S0145	CCA0694S0074	CCA0656S0027	CCA0698S0174	CCA0546S0128	CCA0597S0035	CCA0679S0142
CCA0662S0142	CCA0700S0070	CCA0627S0058	CCA0605S0047	CCA0607S0055	CCA0627S0039	CCA0694S0091	CCA0656S0032	CCA0698S0182	CCA0546S0134	CCA0597S0037	CCA0679S0147
CCA0665S0005	CCA0700S0071	CCA0627S0066	CCA0605S0048	CCA0607S0067	CCA0627S0042	CCA0694S0092	CCA0656S0033	CCA0698S0184	CCA0546S0150	CCA0597S0040	CCA0679S0155
CCA0665S0057	CCA0700S0078	CCA0627S0074	CCA0605S0051	CCA0607S0082	CCA0628S0049	CCA0696S0041	CCA0656S0056	CCA0698S0208	CCA0546S0188	CCA0597S0043	CCA0680S0035
CCA0665S0076	CCA0700S0087	CCA0627S0075	CCA0605S0066	CCA0607S0086	CCA0628S0054	CCA0696S0046	CCA0656S0094	CCA0698S0218	CCA0546S0200	CCA0597S0044	CCA0680S0052
CCA0669S0005	CCA0700S0132	CCA0628S0008	CCA0605S0067	CCA0607S0091	CCA0631S0004	CCA0696S0058	CCA0656S0098	CCA0700S0024	CCA0546S0206	CCA0597S0047	CCA0680S0053
CCA0669S0010	CCA0700S0133	CCA0628S0027	CCA0605S0072	CCA0610S0037	CCA0632S0072	CCA0696S0060	CCA0659S0015	CCA0700S0028	CCA0546S0228	CCA0597S0066	CCA0680S0073
CCA0670S0029	CCA0700S0140	CCA0628S0063	CCA0605S0119	CCA0610S0057	CCA0632S0083	CCA0696S0061	CCA0659S0037	CCA0700S0082	CCA0546S0240	CCA0597S0072	CCA0680S0101
CCA0670S0031	CCA0701S0006	CCA0628S0065	CCA0607S0021	CCA0613S0022	CCA0632S0092	CCA0696S0080	CCA0659S0045	CCA0700S0083	CCA0546S0242	CCA0597S0077	CCA0680S0103
CCA0670S0046	CCA0701S0034	CCA0628S0082	CCA0607S0059	CCA0616S0009	CCA0632S0114	CCA0696S0091	CCA0659S0056	CCA0700S0088	CCA0546S0247	CCA0597S0081	CCA0680S0106
CCA0670S0072	CCA0701S0035	CCA0632S0047	CCA0610S0045	CCA0616S0016	CCA0632S0127	CCA0696S0098	CCA0659S0065	CCA0700S0090	CCA0546S0249	CCA0597S0088	CCA0680S0128
CCA0670S0073	CCA0701S0071	CCA0632S0066	CCA0613S0012	CCA0616S0018	CCA0632S0136	CCA0698S0019	CCA0659S0089	CCA0700S0107	CCA0546S0252	CCA0597S0113	CCA0681S0015
CCA0670S0083	CCA0701S0085	CCA0632S0077	CCA0613S0019	CCA0616S0044	CCA0632S0176	CCA0698S0039	CCA0659S0093	CCA0700S0136	CCA0546S0255	CCA0597S0117	CCA0681S0034
CCA0670S0093	CCA0701S0107	CCA0632S0078	CCA0613S0035	CCA0616S0090	CCA0633S0009	CCA0698S0044	CCA0659S0104	CCA0700S0139	CCA0546S0256	CCA0597S0118	CCA0681S0040
CCA0670S0097	CCA0701S0119	CCA0632S0095	CCA0613S0043	CCA0616S0098	CCA0633S0011	CCA0698S0046	CCA0659S0108	CCA0700S0141	CCA0546S0257	CCA0597S0136	CCA0681S0104
CCA0670S0114	CCA0701S0120	CCA0632S0100	CCA0613S0052	CCA0616S0101	CCA0633S0048	CCA0698S0056	CCA0659S0109	CCA0700S0144	CCA0546S0258	CCA0597S0162	CCA0686S0009
CCA0670S0117	CCA0704S0001	CCA0632S0126	CCA0616S0013	CCA0616S0133	CCA0633S0078	CCA0698S0058	CCA0659S0124	CCA0701S0054	CCA0546S0262	CCA0597S0205	CCA0686S0036
CCA0670S0142	CCA0704S0003	CCA0632S0128	CCA0616S0025	CCA0616S0143	CCA0633S0098	CCA0698S0092	CCA0659S0132	CCA0701S0068	CCA0546S0265	CCA0598S0009	CCA0686S0087
CCA0670S0152	CCA0704S0006	CCA0632S0139	CCA0616S0037	CCA0616S0146	CCA0633S0111	CCA0698S0100	CCA0659S0143	CCA0701S0070	CCA0546S0277	CCA0598S0024	CCA0688S0003
CCA0674S0037	CCA0704S0038	CCA0632S0144	CCA0616S0048	CCA0616S0149	CCA0634S0017	CCA0698S0140	CCA0659S0158	CCA0701S0100	CCA0546S0286	CCA0598S0037	CCA0691S0013
CCA0674S0039	CCA0704S0057	CCA0632S0146	CCA0616S0068	CCA0616S0154	CCA0634S0020	CCA0698S0151	CCA0659S0166	CCA0701S0105	CCA0546S0289	CCA0598S0101	CCA0691S0046
CCA0674S0046	CCA0704S0058	CCA0632S0153	CCA0616S0091	CCA0616S0161	CCA0634S0039	CCA0698S0196	CCA0659S0203	CCA0701S0125	CCA0546S0296	CCA0598S0110	CCA0691S0048
CCA0674S0061	CCA0704S0073	CCA0632S0179	CCA0616S0093	CCA0616S0169	CCA0634S0061	CCA0698S0231	CCA0659S0212	CCA0701S0144	CCA0546S0297	CCA0598S0118	CCA0691S0081
CCA0674S0065	CCA0704S0119	CCA0632S0184	CCA0616S0100	CCA0616S0171	CCA0634S0094	CCA0700S0012	CCA0659S0250	CCA0704S0002	CCA0546S0314	CCA0598S0120	CCA0691S0106
CCA0674S0066	CCA0704S0138	CCA0633S0021	CCA0616S0102	CCA0620S0014	CCA0638S0015	CCA0700S0045	CCA0662S0005	CCA0704S0043	CCA0549S0013	CCA0598S0127	CCA0691S0114
CCA0674S0076	CCA0704S0154	CCA0633S0029	CCA0616S0106	CCA0620S0036	CCA0638S0025	CCA0700S0054	CCA0662S0018	CCA0704S0064	CCA0549S0014	CCA0598S0128	CCA0694S0025
CCA0674S0077	CCA0704S0170	CCA0633S0067	CCA0616S0128	CCA0623S0005	CCA0638S0028	CCA0700S0117	CCA0662S0026	CCA0704S0102	CCA0549S0026	CCA0598S0131	CCA0694S0066
CCA0674S0094	CCA0705S0017	CCA0633S0087	CCA0616S0131	CCA0623S0009	CCA0638S0052	CCA0700S0138	CCA0662S0048	CCA0704S0113	CCA0549S0029	CCA0601S0004	CCA0694S0078
CCA0674S0098	CCA0705S0024	CCA0633S0094	CCA0616S0137	CCA0623S0021	CCA0638S0058	CCA0701S0027	CCA0662S0053	CCA0704S0114	CCA0549S0031	CCA0601S0015	CCA0694S0081
CCA0674S0099	CCA0705S0044	CCA0634S0009	CCA0620S0051	CCA0623S0023	CCA0638S0091	CCA0701S0056	CCA0662S0064	CCA0704S0118	CCA0549S0039	CCA0601S0036	CCA0696S0014
CCA0674S0106	CCA0705S0049	CCA0634S0024	CCA0620S0054	CCA0623S0060	CCA0638S0098	CCA0701S0064	CCA0662S0068	CCA0704S0127	CCA0549S0052	CCA0601S0040	CCA0696S0052
CCA0674S0109	CCA0705S0053	CCA0634S0026	CCA0620S0055	CCA0623S0071	CCA0638S0125	CCA0701S0074	CCA0662S0072	CCA0704S0130	CCA0549S0057	CCA0601S0042	CCA0696S0056
CCA0674S0119	CCA0708S0008	CCA0634S0027	CCA0623S0010	CCA0623S0106	CCA0638S0161	CCA0701S0080	CCA0662S0126	CCA0704S0159	CCA0549S0065	CCA0601S0044	CCA0696S0096
CCA0674S0120	CCA0708S0011	CCA0634S0059	CCA0623S0019	CCA0623S0108	CCA0638S0164	CCA0701S0089	CCA0662S0130	CCA0704S0160	CCA0549S0067	CCA0601S0056	CCA0698S0024
CCA0674S0140	CCA0708S0034	CCA0634S0075	CCA0623S0037	CCA0623S0119	CCA0638S0165	CCA0701S0090	CCA0662S0147	CCA0704S0161	CCA0549S0069	CCA0601S0059	CCA0698S0064
CCA0674S0141	CCA0708S0042	CCA0634S0076	CCA0623S0059	CCA0623S0133	CCA0638S0205	CCA0701S0091	CCA0665S0002	CCA0708S0049	CCA0549S0076	CCA0601S0125	CCA0698S0065
CCA0674S0144	CCA0708S0072	CCA0634S0119	CCA0623S0095	CCA0623S0137	CCA0638S0208	CCA0701S0127	CCA0665S0010	CCA0708S0070	CCA0549S0077	CCA0605S0016	CCA0698S0084
CCA0674S0158	CCA0708S0127	CCA0634S0122	CCA0623S0112	CCA0623S0144	CCA0642S0001	CCA0701S0143	CCA0665S0042	CCA0708S0097	CCA0549S0090	CCA0605S0032	CCA0698S0116
CCA0674S0172	CCA0709S0006	CCA0638S0023	CCA0623S0122	CCA0623S0146	CCA0642S0004	CCA0704S0026	CCA0665S0058	CCA0708S0105	CCA0549S0118	CCA0605S0038	CCA0698S0117
CCA0674S0173	CCA0709S0039	CCA0638S0024	CCA0623S0125	CCA0627S0038	CCA0642S0005	CCA0704S0040	CCA0670S0019	CCA0708S0109	CCA0549S0127	CCA0605S0061	CCA0698S0129
CCA0674S0179	CCA0711S0024	CCA0638S0056	CCA0623S0128	CCA0627S0044	CCA0642S0006	CCA0704S0053	CCA0670S0024	CCA0708S0119	CCA0549S0128	CCA0605S0108	CCA0698S0132
CCA0674S0182	CCA0714S0001	CCA0638S0061	CCA0623S0130	CCA0627S0051	CCA0642S0031	CCA0704S0062	CCA0670S0036	CCA0708S0129	CCA0549S0137	CCA0607S0037	CCA0698S0134
CCA0674S0188	CCA0716S0018	CCA0638S0070	CCA0623S0149	CCA0628S0007	CCA0642S0039	CCA0704S0100	CCA0670S0155	CCA0709S0036	CCA0549S0140	CCA0607S0087	CCA0698S0157
CCA0674S0194	CCA0716S0058	CCA0638S0094	CCA0627S0008	CCA0628S0013	CCA0642S0047	CCA0704S0107	CCA0674S0007	CCA0709S0061	CCA0549S0146	CCA0607S0092	CCA0698S0158
CCA0674S0196	CCA0716S0088	CCA0638S0095	CCA0627S0018	CCA0628S0026	CCA0642S0048	CCA0704S0110	CCA0674S0020	CCA0709S0070	CCA0549S0147	CCA0610S0010	CCA0698S0169
CCA0676S0006	CCA0716S0091	CCA0638S0101	CCA0627S0059	CCA0628S0058	CCA0642S0049	CCA0704S0112	CCA0674S0053	CCA0709S0104	CCA0549S0148	CCA0610S0031	CCA0698S0206
CCA0676S0020	CCA0716S0093	CCA0638S0105	CCA0627S0060	CCA0628S0067	CCA0642S0062	CCA0704S0150	CCA0674S0059	CCA0711S0021	CCA0552S0027	CCA0610S0048	CCA0698S0210
CCA0676S0032	CCA0716S0098	CCA0638S0127	CCA0628S0002	CCA0632S0013	CCA0642S0080	CCA0704S0151	CCA0674S0060	CCA0716S0015	CCA0552S0054	CCA0613S0027	CCA0698S0227
CCA0676S0033	CCA0718S0001	CCA0638S0155	CCA0628S0006	CCA0632S0018	CCA0642S0090	CCA0704S0162	CCA0674S0063	CCA0716S0065	CCA0552S0080	CCA0613S0048	CCA0698S0230
CCA0676S0038	CCA0718S0002	CCA0638S0203	CCA0628S0024	CCA0632S0031	CCA0642S0101	CCA0705S0013	CCA0674S0067	CCA0716S0067	CCA0552S0119	CCA0613S0069	CCA0698S0237
CCA0676S0084	CCA0718S0020	CCA0642S0032	CCA0628S0033	CCA0632S0034	CCA0642S0172	CCA0706S0001	CCA0674S0070	CCA0716S0072	CCA0552S0122	CCA0613S0086	CCA0700S0014
CCA0676S0106	CCA0718S0021	CCA0642S0055	CCA0628S0062	CCA0632S0069	CCA0642S0176	CCA0708S0017	CCA0674S0078	CCA0716S0082	CCA0552S0131	CCA0616S0088	CCA0700S0017
CCA0678S0008	CCA0718S0024	CCA0642S0056	CCA0628S0076	CCA0632S0071	CCA0646S0014	CCA0708S0028	CCA0674S0117	CCA0716S0097	CCA0552S0164	CCA0616S0110	CCA0700S0064
CCA0678S0040	CCA0718S0061	CCA0642S0076	CCA0632S0046	CCA0632S0074	CCA0646S0026	CCA0708S0041	CCA0674S0165	CCA0718S0025	CCA0552S0173	CCA0616S0132	CCA0700S0073
CCA0678S0054	CCA0718S0065	CCA0642S0112	CCA0632S0051	CCA0632S0085	CCA0646S0037	CCA0708S0043	CCA0674S0175	CCA0718S0026	CCA0552S0185	CCA0616S0144	CCA0700S0075
CCA0678S0061	CCA0718S0087	CCA0642S0121	CCA0632S0073	CCA0632S0107	CCA0646S0060	CCA0708S0048	CCA0674S0176	CCA0718S0040	CCA0552S0209	CCA0616S0145	CCA0700S0077
CCA0678S0065	CCA0718S0095	CCA0642S0138	CCA0632S0086	CCA0632S0135	CCA0646S0064	CCA0708S0060	CCA0674S0187	CCA0718S0088	CCA0552S0216	CCA0616S0152	CCA0700S0086
CCA0678S0073	CCA0718S0123	CCA0642S0142	CCA0632S0175	CCA0632S0171	CCA0646S0087	CCA0708S0063	CCA0674S0203	CCA0718S0099	CCA0552S0235	CCA0620S0045	CCA0700S0116
CCA0678S0076	CCA0718S0128	CCA0646S0008	CCA0632S0180	CCA0633S0005	CCA0646S0095	CCA0708S0130	CCA0674S0204	CCA0718S0109	CCA0552S0254	CCA0623S0039	CCA0701S0021
CCA0678S0090	CCA0718S0143	CCA0646S0038	CCA0632S0182	CCA0633S0031	CCA0646S0107	CCA0709S0004	CCA0676S0015	CCA0718S0138	CCA0552S0266	CCA0623S0066	CCA0701S0113
CCA0678S0094	CCA0718S0155	CCA0646S0065	CCA0632S0183	CCA0633S0037	CCA0646S0108	CCA0709S0021	CCA0676S0019	CCA0718S0141	CCA0552S0277	CCA0623S0073	CCA0701S0118
CCA0678S0098	CCA0721S0028	CCA0646S0071	CCA0632S0188	CCA0633S0075	CCA0646S0120	CCA0709S0028	CCA0676S0022	CCA0721S0030	CCA0555S0021	CCA0623S0076	CCA0701S0154
CCA0678S0099	CCA0721S0035	CCA0646S0075	CCA0633S0008	CCA0633S0079	CCA0646S0138	CCA0709S0032	CCA0676S0047	CCA0724S0018	CCA0555S0039	CCA0623S0077	CCA0704S0023
CCA0678S0117	CCA0721S0046	CCA0646S0083	CCA0633S0020	CCA0633S0096	CCA0646S0151	CCA0709S0042	CCA0676S0056	CCA0724S0036	CCA0555S0040	CCA0623S0078	CCA0704S0089
CCA0678S0120	CCA0724S0038	CCA0646S0100	CCA0633S0053	CCA0633S0102	CCA0648S0001	CCA0709S0051	CCA0676S0094	CCA0724S0052	CCA0555S0042	CCA0623S0091	CCA0704S0092
CCA0678S0137	CCA0724S0055	CCA0646S0105	CCA0633S0071	CCA0633S0108	CCA0649S0002	CCA0709S0064	CCA0676S0095	CCA0729S0002	CCA0555S0043	CCA0623S0100	CCA0704S0093
CCA0678S0159	CCA0724S0072	CCA0646S0106	CCA0633S0088	CCA0634S0016	CCA0649S0020	CCA0711S0057	CCA0676S0104	CCA0729S0021	CCA0555S0055	CCA0623S0101	CCA0704S0096
CCA0678S0160	CCA0729S0004	CCA0646S0129	CCA0633S0095	CCA0634S0019	CCA0649S0032	CCA0711S0059	CCA0676S0115	CCA0729S0051	CCA0555S0056	CCA0623S0102	CCA0704S0137
CCA0678S0191	CCA0729S0045	CCA0646S0140	CCA0633S0099	CCA0634S0047	CCA0649S0034	CCA0711S0060	CCA0677S0001	CCA0730S0001	CCA0555S0075	CCA0623S0105	CCA0704S0145
CCA0679S0016	CCA0733S0011	CCA0646S0145	CCA0633S0105	CCA0634S0093	CCA0649S0042	CCA0716S0005	CCA0678S0011	CCA0733S0018	CCA0555S0086	CCA0623S0156	CCA0704S0146
CCA0679S0096	CCA0733S0013	CCA0646S0148	CCA0634S0025	CCA0634S0128	CCA0649S0049	CCA0716S0059	CCA0678S0035	CCA0733S0046	CCA0555S0096	CCA0627S0022	CCA0704S0148
CCA0679S0114	CCA0733S0075	CCA0646S0149	CCA0634S0029	CCA0638S0006	CCA0649S0055	CCA0718S0018	CCA0678S0039	CCA0733S0067	CCA0555S0109	CCA0627S0027	CCA0704S0171
CCA0679S0137	CCA0733S0091	CCA0646S0152	CCA0634S0042	CCA0638S0008	CCA0649S0063	CCA0718S0037	CCA0678S0053	CCA0733S0092	CCA0555S0121	CCA0627S0032	CCA0705S0005
CCA0679S0141	CCA0733S0107	CCA0646S0153	CCA0634S0049	CCA0638S0053	CCA0649S0083	CCA0718S0042	CCA0678S0104	CCA0733S0100	CCA0555S0140	CCA0627S0050	CCA0705S0006
CCA0680S0006	CCA0733S0123	CCA0646S0164	CCA0634S0067	CCA0638S0057	CCA0652S0033	CCA0718S0044	CCA0678S0107	CCA0733S0104	CCA0555S0158	CCA0627S0053	CCA0705S0054
CCA0680S0007	CCA0733S0127	CCA0646S0169	CCA0634S0069	CCA0638S0069	CCA0652S0056	CCA0718S0062	CCA0678S0118	CCA0733S0134	CCA0555S0187	CCA0627S0054	CCA0705S0069
CCA0680S0020	CCA0733S0132	CCA0646S0172	CCA0634S0081	CCA0638S0072	CCA0652S0065	CCA0718S0066	CCA0678S0182	CCA0736S0020	CCA0555S0194	CCA0627S0070	CCA0705S0090
CCA0680S0041	CCA0733S0141	CCA0649S0001	CCA0634S0110	CCA0638S0083	CCA0652S0082	CCA0718S0118	CCA0678S0183	CCA0736S0021	CCA0555S0234	CCA0628S0028	CCA0705S0104
CCA0680S0043	CCA0733S0143	CCA0649S0033	CCA0634S0124	CCA0638S0097	CCA0652S0090	CCA0718S0129	CCA0678S0187	CCA0736S0022	CCA0555S0254	CCA0628S0029	CCA0708S0023
CCA0680S0065	CCA0736S0001	CCA0649S0035	CCA0638S0034	CCA0638S0102	CCA0654S0010	CCA0718S0153	CCA0678S0203	CCA0736S0045	CCA0555S0257	CCA0628S0031	CCA0708S0040
CCA0680S0067	CCA0736S0015	CCA0649S0045	CCA0638S0040	CCA0638S0117	CCA0654S0033	CCA0721S0025	CCA0678S0204	CCA0736S0068	CCA0555S0258	CCA0628S0041	CCA0708S0045
CCA0680S0086	CCA0736S0050	CCA0649S0061	CCA0638S0063	CCA0638S0126	CCA0654S0043	CCA0724S0026	CCA0679S0010	CCA0737S0009	CCA0555S0260	CCA0628S0059	CCA0708S0047
CCA0680S0107	CCA0736S0051	CCA0649S0085	CCA0638S0065	CCA0638S0132	CCA0654S0071	CCA0733S0020	CCA0679S0012	CCA0737S0033	CCA0559S0036	CCA0628S0060	CCA0709S0013
CCA0680S0117	CCA0736S0064	CCA0649S0091	CCA0638S0071	CCA0638S0158	CCA0654S0093	CCA0733S0025	CCA0679S0097	CCA0737S0064	CCA0559S0050	CCA0632S0019	CCA0709S0027
CCA0680S0139	CCA0736S0077	CCA0649S0106	CCA0638S0096	CCA0638S0160	CCA0654S0099	CCA0733S0068	CCA0679S0111	CCA0737S0067	CCA0559S0056	CCA0632S0035	CCA0709S0066
CCA0680S0140	CCA0737S0001	CCA0652S0008	CCA0638S0136	CCA0638S0170	CCA0656S0030	CCA0733S0074	CCA0679S0129	CCA0737S0114	CCA0559S0059	CCA0632S0058	CCA0709S0080
CCA0680S0144	CCA0737S0011	CCA0652S0010	CCA0638S0137	CCA0638S0190	CCA0656S0050	CCA0733S0077	CCA0679S0132	CCA0743S0007	CCA0559S0079	CCA0632S0068	CCA0711S0023
CCA0681S0023	CCA0737S0066	CCA0652S0035	CCA0638S0153	CCA0642S0010	CCA0656S0057	CCA0733S0084	CCA0679S0154	CCA0743S0008	CCA0559S0081	CCA0632S0115	CCA0711S0025
CCA0681S0050	CCA0737S0109	CCA0652S0076	CCA0638S0154	CCA0642S0014	CCA0656S0068	CCA0733S0094	CCA0680S0017	CCA0743S0009	CCA0559S0084	CCA0632S0124	CCA0711S0037
CCA0681S0068	CCA0737S0111	CCA0652S0092	CCA0638S0179	CCA0642S0027	CCA0656S0069	CCA0733S0126	CCA0680S0031	CCA0743S0062	CCA0559S0089	CCA0632S0130	CCA0711S0040
CCA0681S0085	CCA0737S0116	CCA0652S0123	CCA0638S0180	CCA0642S0036	CCA0657S0002	CCA0736S0061	CCA0680S0040	CCA0747S0016	CCA0559S0092	CCA0632S0150	CCA0713S0001
CCA0681S0092	CCA0747S0052	CCA0652S0125	CCA0638S0181	CCA0642S0040	CCA0659S0008	CCA0736S0062	CCA0680S0046	CCA0747S0037	CCA0559S0103	CCA0632S0151	CCA0716S0047
CCA0681S0094	CCA0748S0032	CCA0652S0127	CCA0638S0207	CCA0642S0057	CCA0659S0016	CCA0737S0005	CCA0680S0112	CCA0748S0015	CCA0559S0108	CCA0632S0177	CCA0718S0013
CCA0681S0101	CCA0748S0104	CCA0654S0004	CCA0642S0033	CCA0642S0114	CCA0659S0031	CCA0737S0017	CCA0680S0115	CCA0748S0043	CCA0560S0001	CCA0632S0185	CCA0718S0023
CCA0686S0013	CCA0749S0010	CCA0654S0018	CCA0642S0038	CCA0642S0122	CCA0659S0055	CCA0737S0034	CCA0680S0129	CCA0749S0009	CCA0563S0003	CCA0633S0093	CCA0718S0048
CCA0686S0038	CCA0749S0038	CCA0654S0021	CCA0642S0050	CCA0642S0132	CCA0659S0063	CCA0737S0054	CCA0681S0009	CCA0752S0001	CCA0563S0008	CCA0633S0101	CCA0718S0060
CCA0686S0040	CCA0749S0049	CCA0654S0032	CCA0642S0078	CCA0642S0135	CCA0659S0068	CCA0737S0077	CCA0681S0013	CCA0754S0005	CCA0563S0016	CCA0634S0031	CCA0718S0063
CCA0686S0045	CCA0754S0063	CCA0654S0035	CCA0642S0170	CCA0642S0162	CCA0659S0082	CCA0737S0078	CCA0681S0014	CCA0754S0024	CCA0563S0018	CCA0634S0033	CCA0718S0102
CCA0686S0078	CCA0754S0069	CCA0654S0057	CCA0643S0001	CCA0642S0166	CCA0659S0118	CCA0747S0019	CCA0681S0017	CCA0754S0045	CCA0563S0066	CCA0634S0035	CCA0718S0135
CCA0688S0047	CCA0754S0100	CCA0654S0064	CCA0646S0001	CCA0646S0049	CCA0659S0153	CCA0747S0021	CCA0681S0062	CCA0754S0060	CCA0563S0087	CCA0634S0048	CCA0718S0140
CCA0688S0058	CCA0754S0103	CCA0654S0068	CCA0646S0006	CCA0646S0069	CCA0659S0162	CCA0747S0042	CCA0681S0065	CCA0754S0067	CCA0565S0001	CCA0634S0068	CCA0721S0023
CCA0688S0067	CCA0754S0104	CCA0654S0069	CCA0646S0009	CCA0646S0074	CCA0659S0163	CCA0747S0055	CCA0681S0089	CCA0754S0168	CCA0565S0035	CCA0634S0125	CCA0721S0029
CCA0691S0011	CCA0754S0107	CCA0654S0076	CCA0646S0043	CCA0646S0103	CCA0659S0180	CCA0747S0069	CCA0686S0021	CCA0756S0001	CCA0565S0103	CCA0634S0127	CCA0723S0001
CCA0691S0083	CCA0754S0108	CCA0654S0079	CCA0646S0044	CCA0646S0114	CCA0659S0220	CCA0748S0011	CCA0686S0022	CCA0757S0014	CCA0565S0120	CCA0635S0004	CCA0724S0058
CCA0691S0127	CCA0754S0117	CCA0656S0010	CCA0646S0052	CCA0646S0117	CCA0662S0024	CCA0748S0025	CCA0686S0066	CCA0757S0038	CCA0566S0008	CCA0638S0007	CCA0724S0080
CCA0694S0051	CCA0754S0148	CCA0656S0020	CCA0646S0053	CCA0646S0123	CCA0662S0036	CCA0748S0048	CCA0686S0070	CCA0757S0081	CCA0566S0014	CCA0638S0033	CCA0729S0001
CCA0694S0095	CCA0757S0003	CCA0656S0049	CCA0646S0062	CCA0646S0125	CCA0662S0041	CCA0748S0080	CCA0688S0007	CCA0757S0089	CCA0566S0026	CCA0638S0074	CCA0729S0008
CCA0696S0030	CCA0757S0055	CCA0656S0060	CCA0646S0068	CCA0646S0141	CCA0662S0058	CCA0749S0002	CCA0688S0029	CCA0762S0006	CCA0566S0035	CCA0638S0082	CCA0729S0030
CCA0696S0045	CCA0757S0092	CCA0656S0091	CCA0646S0084	CCA0646S0160	CCA0662S0061	CCA0749S0006	CCA0688S0037	CCA0762S0017	CCA0566S0044	CCA0638S0092	CCA0729S0038
CCA0696S0079	CCA0757S0105	CCA0659S0001	CCA0646S0086	CCA0649S0006	CCA0662S0065	CCA0749S0044	CCA0688S0078	CCA0762S0022	CCA0566S0046	CCA0638S0100	CCA0733S0004
CCA0696S0089	CCA0758S0001	CCA0659S0044	CCA0646S0090	CCA0649S0047	CCA0662S0095	CCA0749S0053	CCA0691S0017	CCA0762S0041	CCA0566S0062	CCA0638S0106	CCA0733S0014
CCA0698S0007	CCA0761S0001	CCA0659S0046	CCA0646S0091	CCA0649S0060	CCA0662S0157	CCA0754S0004	CCA0691S0036	CCA0762S0062	CCA0566S0072	CCA0638S0119	CCA0733S0064
CCA0698S0025	CCA0762S0007	CCA0659S0052	CCA0646S0099	CCA0649S0065	CCA0665S0004	CCA0754S0016	CCA0691S0051	CCA0762S0065	CCA0566S0076	CCA0638S0121	CCA0733S0139
CCA0698S0035	CCA0762S0026	CCA0659S0058	CCA0646S0146	CCA0649S0071	CCA0665S0026	CCA0754S0041	CCA0691S0056	CCA0763S0014	CCA0566S0079	CCA0638S0130	CCA0733S0140
CCA0698S0074	CCA0763S0038	CCA0659S0067	CCA0649S0043	CCA0649S0079	CCA0665S0046	CCA0754S0053	CCA0691S0069	CCA0763S0065	CCA0566S0107	CCA0638S0140	CCA0736S0067
CCA0698S0156	CCA0763S0044	CCA0659S0070	CCA0649S0068	CCA0649S0093	CCA0665S0074	CCA0754S0058	CCA0691S0113	CCA0765S0063	CCA0566S0117	CCA0638S0152	CCA0736S0097
CCA0698S0203	CCA0763S0055	CCA0659S0079	CCA0649S0070	CCA0649S0113	CCA0669S0006	CCA0754S0061	CCA0691S0115	CCA0765S0071	CCA0566S0123	CCA0638S0159	CCA0737S0014
CCA0698S0209	CCA0763S0084	CCA0659S0091	CCA0649S0081	CCA0651S0001	CCA0670S0008	CCA0754S0064	CCA0694S0013	CCA0765S0098	CCA0566S0136	CCA0638S0186	CCA0737S0027
CCA0698S0224	CCA0763S0091	CCA0659S0099	CCA0649S0111	CCA0652S0062	CCA0670S0035	CCA0754S0070	CCA0694S0037	CCA0769S0001	CCA0568S0002	CCA0638S0198	CCA0737S0029
CCA0698S0235	CCA0765S0042	CCA0659S0113	CCA0652S0043	CCA0652S0063	CCA0670S0086	CCA0754S0138	CCA0694S0053	CCA0770S0017	CCA0568S0003	CCA0642S0002	CCA0737S0031
CCA0700S0004	CCA0765S0050	CCA0659S0123	CCA0652S0057	CCA0652S0071	CCA0670S0105	CCA0757S0051	CCA0694S0057	CCA0770S0030	CCA0568S0059	CCA0642S0020	CCA0737S0036
CCA0700S0041	CCA0765S0089	CCA0659S0126	CCA0652S0059	CCA0652S0073	CCA0670S0127	CCA0757S0107	CCA0696S0006	CCA0774S0016	CCA0573S0029	CCA0642S0043	CCA0737S0045
CCA0700S0085	CCA0765S0095	CCA0659S0130	CCA0652S0064	CCA0652S0086	CCA0670S0129	CCA0757S0109	CCA0696S0013	CCA0774S0019	CCA0573S0036	CCA0642S0052	CCA0737S0047
CCA0700S0089	CCA0770S0026	CCA0659S0139	CCA0652S0072	CCA0652S0093	CCA0670S0137	CCA0762S0010	CCA0696S0039	CCA0774S0036	CCA0573S0044	CCA0642S0053	CCA0737S0056
CCA0700S0095	CCA0774S0004	CCA0659S0171	CCA0652S0126	CCA0652S0108	CCA0670S0153	CCA0762S0032	CCA0696S0077	CCA0774S0054	CCA0573S0049	CCA0642S0067	CCA0737S0058
CCA0700S0124	CCA0774S0038	CCA0659S0175	CCA0654S0016	CCA0652S0112	CCA0670S0159	CCA0762S0051	CCA0696S0082	CCA0774S0056	CCA0573S0068	CCA0642S0075	CCA0737S0061
CCA0701S0003	CCA0774S0046	CCA0659S0196	CCA0654S0023	CCA0654S0012	CCA0674S0019	CCA0762S0059	CCA0696S0087	CCA0774S0063	CCA0573S0074	CCA0642S0094	CCA0737S0065
CCA0701S0044	CCA0774S0055	CCA0659S0201	CCA0654S0036	CCA0654S0013	CCA0674S0042	CCA0763S0015	CCA0698S0041	CCA0774S0082	CCA0573S0076	CCA0642S0107	CCA0737S0084
CCA0701S0046	CCA0774S0068	CCA0659S0207	CCA0654S0047	CCA0654S0031	CCA0674S0044	CCA0763S0042	CCA0698S0043	CCA0777S0001	CCA0573S0080	CCA0642S0108	CCA0737S0086
CCA0701S0058	CCA0774S0069	CCA0659S0209	CCA0654S0085	CCA0654S0034	CCA0674S0051	CCA0763S0073	CCA0698S0047	CCA0777S0003	CCA0573S0100	CCA0642S0111	CCA0745S0001
CCA0701S0063	CCA0778S0001	CCA0659S0219	CCA0655S0002	CCA0654S0039	CCA0674S0057	CCA0763S0092	CCA0698S0050	CCA0779S0072	CCA0573S0102	CCA0642S0175	CCA0747S0005
CCA0701S0079	CCA0779S0001	CCA0659S0245	CCA0656S0003	CCA0654S0080	CCA0674S0083	CCA0765S0030	CCA0698S0094	CCA0779S0092	CCA0573S0118	CCA0646S0015	CCA0747S0007
CCA0701S0102	CCA0779S0042	CCA0662S0016	CCA0656S0016	CCA0654S0086	CCA0674S0100	CCA0765S0056	CCA0698S0147	CCA0779S0106	CCA0573S0198	CCA0646S0024	CCA0747S0013
CCA0701S0103	CCA0779S0046	CCA0662S0076	CCA0656S0019	CCA0656S0031	CCA0674S0101	CCA0765S0113	CCA0698S0150	CCA0779S0122	CCA0576S0009	CCA0646S0058	CCA0747S0032
CCA0701S0115	CCA0779S0051	CCA0662S0088	CCA0656S0023	CCA0656S0079	CCA0674S0127	CCA0770S0016	CCA0698S0155	CCA0779S0123	CCA0576S0018	CCA0646S0063	CCA0747S0044
CCA0701S0126	CCA0779S0054	CCA0662S0089	CCA0656S0028	CCA0656S0084	CCA0674S0216	CCA0770S0029	CCA0698S0165	CCA0779S0128	CCA0576S0021	CCA0646S0080	CCA0747S0051
CCA0701S0157	CCA0779S0056	CCA0662S0097	CCA0656S0078	CCA0656S0090	CCA0676S0024	CCA0774S0003	CCA0698S0171	CCA0779S0134	CCA0576S0031	CCA0646S0096	CCA0748S0006
CCA0701S0161	CCA0779S0057	CCA0662S0102	CCA0659S0036	CCA0659S0002	CCA0676S0048	CCA0774S0018	CCA0698S0177	CCA0779S0135	CCA0576S0041	CCA0646S0102	CCA0748S0016
CCA0704S0031	CCA0779S0093	CCA0662S0105	CCA0659S0039	CCA0659S0014	CCA0676S0058	CCA0774S0021	CCA0698S0179	CCA0779S0169	CCA0576S0047	CCA0646S0119	CCA0748S0018
CCA0704S0065	CCA0779S0157	CCA0662S0122	CCA0659S0041	CCA0659S0023	CCA0676S0099	CCA0774S0058	CCA0698S0188	CCA0779S0247	CCA0576S0048	CCA0646S0156	CCA0748S0033
CCA0704S0072	CCA0779S0187	CCA0662S0125	CCA0659S0042	CCA0659S0073	CCA0678S0009	CCA0775S0001	CCA0698S0197	CCA0779S0251	CCA0576S0053	CCA0646S0162	CCA0748S0035
CCA0704S0085	CCA0779S0262	CCA0662S0156	CCA0659S0048	CCA0659S0077	CCA0678S0049	CCA0779S0023	CCA0698S0207	CCA0779S0260	CCA0576S0060	CCA0646S0166	CCA0748S0051
CCA0704S0111	CCA0779S0263	CCA0662S0158	CCA0659S0076	CCA0659S0083	CCA0678S0083	CCA0779S0034	CCA0698S0215	CCA0779S0265	CCA0576S0066	CCA0649S0048	CCA0748S0052
CCA0704S0120	CCA0781S0002	CCA0665S0009	CCA0659S0088	CCA0659S0102	CCA0678S0089	CCA0779S0071	CCA0698S0226	CCA0781S0021	CCA0576S0096	CCA0649S0053	CCA0748S0053
CCA0704S0122	CCA0781S0012	CCA0665S0016	CCA0659S0090	CCA0659S0105	CCA0678S0092	CCA0779S0077	CCA0698S0229	CCA0781S0030	CCA0576S0100	CCA0649S0082	CCA0748S0058
CCA0704S0142	CCA0781S0020	CCA0665S0023	CCA0659S0117	CCA0659S0141	CCA0678S0105	CCA0779S0091	CCA0698S0233	CCA0781S0089	CCA0576S0102	CCA0652S0009	CCA0748S0063
CCA0704S0155	CCA0782S0027	CCA0665S0051	CCA0659S0122	CCA0659S0155	CCA0678S0138	CCA0779S0101	CCA0700S0003	CCA0782S0016	CCA0576S0125	CCA0652S0030	CCA0748S0065
CCA0705S0023	CCA0782S0032	CCA0665S0089	CCA0659S0157	CCA0659S0156	CCA0678S0144	CCA0779S0117	CCA0700S0011	CCA0782S0023	CCA0576S0145	CCA0652S0031	CCA0748S0075
CCA0705S0038	CCA0782S0040	CCA0665S0091	CCA0659S0161	CCA0659S0185	CCA0678S0162	CCA0779S0140	CCA0700S0015	CCA0782S0025	CCA0576S0156	CCA0652S0045	CCA0748S0089
CCA0705S0039	CCA0782S0045	CCA0670S0004	CCA0659S0167	CCA0659S0194	CCA0678S0167	CCA0779S0142	CCA0700S0055	CCA0782S0036	CCA0576S0209	CCA0652S0051	CCA0748S0106
CCA0705S0055	CCA0782S0046	CCA0670S0005	CCA0659S0168	CCA0659S0208	CCA0678S0180	CCA0779S0144	CCA0700S0119	CCA0782S0121	CCA0576S0221	CCA0652S0060	CCA0754S0020
CCA0705S0076	CCA0782S0127	CCA0670S0010	CCA0659S0188	CCA0659S0211	CCA0679S0039	CCA0779S0172	CCA0700S0126	CCA0782S0128	CCA0576S0224	CCA0652S0070	CCA0754S0031
CCA0705S0084	CCA0782S0156	CCA0670S0028	CCA0659S0228	CCA0662S0007	CCA0679S0110	CCA0779S0180	CCA0701S0010	CCA0782S0159	CCA0576S0227	CCA0652S0104	CCA0754S0035
CCA0705S0099	CCA0784S0005	CCA0670S0039	CCA0659S0229	CCA0662S0023	CCA0679S0116	CCA0779S0182	CCA0701S0013	CCA0782S0162	CCA0576S0229	CCA0652S0111	CCA0754S0059
CCA0708S0001	CCA0784S0007	CCA0670S0042	CCA0659S0231	CCA0662S0056	CCA0680S0051	CCA0779S0207	CCA0701S0022	CCA0784S0003	CCA0578S0009	CCA0652S0116	CCA0754S0065
CCA0708S0010	CCA0784S0008	CCA0670S0060	CCA0659S0238	CCA0662S0093	CCA0680S0076	CCA0779S0220	CCA0701S0037	CCA0784S0006	CCA0578S0014	CCA0652S0129	CCA0754S0068
CCA0708S0027	CCA0784S0062	CCA0670S0068	CCA0659S0248	CCA0662S0103	CCA0680S0080	CCA0779S0248	CCA0701S0072	CCA0784S0027	CCA0578S0057	CCA0654S0008	CCA0754S0072
CCA0708S0062	CCA0784S0067	CCA0670S0088	CCA0659S0249	CCA0662S0108	CCA0680S0105	CCA0779S0256	CCA0701S0101	CCA0784S0047	CCA0578S0067	CCA0654S0017	CCA0754S0073
CCA0708S0114	CCA0784S0085	CCA0670S0106	CCA0662S0039	CCA0662S0115	CCA0680S0121	CCA0781S0001	CCA0701S0141	CCA0784S0073	CCA0578S0085	CCA0654S0041	CCA0754S0074
CCA0709S0035	CCA0784S0097	CCA0670S0115	CCA0662S0071	CCA0662S0123	CCA0680S0148	CCA0781S0062	CCA0701S0149	CCA0784S0096	CCA0578S0086	CCA0654S0056	CCA0754S0076
CCA0709S0045	CCA0784S0106	CCA0674S0011	CCA0662S0085	CCA0665S0015	CCA0680S0165	CCA0781S0066	CCA0704S0004	CCA0784S0102	CCA0578S0089	CCA0654S0072	CCA0754S0084
CCA0711S0006	CCA0784S0109	CCA0674S0018	CCA0662S0094	CCA0665S0024	CCA0681S0008	CCA0781S0078	CCA0704S0013	CCA0784S0111	CCA0578S0145	CCA0654S0082	CCA0754S0105
CCA0711S0035	CCA0784S0117	CCA0674S0029	CCA0664S0001	CCA0665S0027	CCA0681S0035	CCA0782S0019	CCA0704S0032	CCA0784S0134	CCA0578S0148	CCA0654S0087	CCA0754S0116
CCA0716S0004	CCA0784S0172	CCA0674S0048	CCA0665S0043	CCA0665S0029	CCA0681S0042	CCA0782S0114	CCA0704S0033	CCA0784S0151	CCA0579S0008	CCA0654S0098	CCA0754S0143
CCA0716S0022	CCA0786S0016	CCA0674S0062	CCA0665S0064	CCA0665S0037	CCA0681S0046	CCA0782S0126	CCA0704S0131	CCA0784S0168	CCA0582S0007	CCA0655S0001	CCA0754S0147
CCA0716S0034	CCA0789S0005	CCA0674S0079	CCA0670S0016	CCA0665S0050	CCA0681S0051	CCA0782S0130	CCA0704S0132	CCA0786S0003	CCA0582S0022	CCA0656S0017	CCA0757S0096
CCA0716S0038	CCA0789S0006	CCA0674S0088	CCA0670S0020	CCA0665S0069	CCA0681S0059	CCA0782S0134	CCA0704S0139	CCA0789S0065	CCA0582S0024	CCA0656S0026	CCA0757S0101
CCA0716S0053	CCA0789S0017	CCA0674S0105	CCA0670S0025	CCA0667S0001	CCA0681S0060	CCA0782S0146	CCA0705S0080	CCA0789S0121	CCA0582S0028	CCA0656S0040	CCA0757S0108
CCA0716S0068	CCA0789S0020	CCA0674S0107	CCA0670S0030	CCA0670S0011	CCA0681S0070	CCA0784S0016	CCA0708S0009	CCA0789S0126	CCA0582S0031	CCA0656S0052	CCA0762S0019
CCA0716S0071	CCA0789S0048	CCA0674S0125	CCA0670S0037	CCA0670S0022	CCA0681S0076	CCA0784S0020	CCA0708S0013	CCA0789S0156	CCA0582S0035	CCA0656S0066	CCA0762S0056
CCA0718S0003	CCA0789S0083	CCA0674S0133	CCA0670S0052	CCA0670S0027	CCA0681S0103	CCA0784S0046	CCA0708S0020	CCA0791S0012	CCA0582S0057	CCA0656S0071	CCA0763S0035
CCA0718S0039	CCA0789S0105	CCA0674S0137	CCA0670S0160	CCA0670S0032	CCA0686S0018	CCA0784S0057	CCA0708S0024	CCA0791S0041	CCA0582S0073	CCA0659S0018	CCA0763S0037
CCA0718S0067	CCA0789S0120	CCA0674S0145	CCA0674S0040	CCA0670S0034	CCA0686S0050	CCA0784S0070	CCA0708S0044	CCA0791S0058	CCA0582S0110	CCA0659S0022	CCA0763S0057
CCA0718S0116	CCA0789S0122	CCA0674S0149	CCA0674S0049	CCA0670S0045	CCA0686S0061	CCA0784S0114	CCA0708S0058	CCA0799S0002	CCA0582S0120	CCA0659S0033	CCA0763S0081
CCA0718S0134	CCA0789S0154	CCA0674S0151	CCA0674S0086	CCA0670S0047	CCA0686S0074	CCA0784S0128	CCA0708S0086	CCA0799S0024	CCA0582S0182	CCA0659S0072	CCA0763S0085
CCA0721S0038	CCA0791S0024	CCA0674S0159	CCA0674S0095	CCA0670S0064	CCA0686S0090	CCA0784S0147	CCA0708S0089	CCA0799S0059	CCA0582S0185	CCA0659S0097	CCA0763S0086
CCA0721S0049	CCA0791S0031	CCA0674S0201	CCA0674S0124	CCA0670S0074	CCA0686S0099	CCA0784S0148	CCA0708S0092	CCA0799S0060	CCA0582S0186	CCA0659S0116	CCA0765S0003
CCA0721S0051	CCA0791S0064	CCA0674S0212	CCA0674S0152	CCA0670S0092	CCA0688S0044	CCA0784S0149	CCA0708S0113	CCA0799S0116	CCA0583S0050	CCA0659S0131	CCA0765S0019
CCA0721S0054	CCA0795S0022	CCA0676S0009	CCA0674S0186	CCA0670S0109	CCA0688S0048	CCA0784S0159	CCA0709S0001	CCA0799S0146	CCA0583S0104	CCA0659S0134	CCA0765S0033
CCA0724S0013	CCA0795S0077	CCA0676S0010	CCA0674S0195	CCA0670S0111	CCA0688S0061	CCA0784S0161	CCA0709S0009	CCA0799S0166	CCA0587S0001	CCA0659S0184	CCA0765S0035
CCA0724S0024	CCA0795S0097	CCA0676S0018	CCA0674S0197	CCA0672S0001	CCA0688S0066	CCA0784S0183	CCA0709S0015	CCA0799S0185	CCA0587S0002	CCA0659S0202	CCA0765S0037
CCA0724S0060	CCA0799S0008	CCA0676S0035	CCA0674S0211	CCA0674S0002	CCA0688S0077	CCA0789S0077	CCA0709S0025	CCA0800S0004	CCA0587S0019	CCA0659S0204	CCA0765S0054
CCA0729S0005	CCA0799S0037	CCA0676S0101	CCA0675S0001	CCA0674S0008	CCA0689S0001	CCA0789S0082	CCA0709S0038	CCA0800S0011	CCA0587S0027	CCA0659S0215	CCA0765S0060
CCA0733S0006	CCA0799S0057	CCA0678S0010	CCA0676S0029	CCA0674S0038	CCA0691S0037	CCA0789S0123	CCA0709S0053	CCA0800S0080	CCA0587S0045	CCA0659S0222	CCA0765S0067
CCA0733S0026	CCA0799S0091	CCA0678S0036	CCA0676S0030	CCA0674S0073	CCA0691S0050	CCA0791S0005	CCA0709S0069	CCA0800S0081	CCA0587S0065	CCA0659S0239	CCA0765S0074
CCA0733S0093	CCA0799S0096	CCA0678S0038	CCA0676S0034	CCA0674S0087	CCA0691S0073	CCA0791S0007	CCA0709S0087	CCA0800S0082	CCA0587S0067	CCA0659S0244	CCA0765S0086
CCA0733S0102	CCA0799S0174	CCA0678S0042	CCA0676S0036	CCA0674S0096	CCA0691S0104	CCA0791S0044	CCA0709S0094	CCA0800S0108	CCA0587S0082	CCA0659S0251	CCA0765S0090
CCA0733S0125	CCA0799S0180	CCA0678S0059	CCA0676S0066	CCA0674S0097	CCA0691S0118	CCA0791S0045	CCA0710S0001	CCA0800S0112	CCA0587S0083	CCA0659S0252	CCA0765S0101
CCA0733S0136	CCA0799S0181	CCA0678S0074	CCA0676S0068	CCA0674S0114	CCA0691S0120	CCA0791S0067	CCA0711S0027	CCA0800S0144	CCA0587S0112	CCA0659S0253	CCA0765S0118
CCA0737S0026	CCA0800S0038	CCA0678S0102	CCA0676S0069	CCA0674S0118	CCA0691S0122	CCA0791S0068	CCA0711S0053	CCA0803S0008	CCA0587S0146	CCA0659S0255	CCA0770S0027
CCA0737S0105	CCA0800S0042	CCA0678S0103	CCA0676S0086	CCA0674S0121	CCA0691S0123	CCA0791S0076	CCA0716S0006	CCA0803S0115	CCA0587S0182	CCA0659S0258	CCA0770S0043
CCA0743S0031	CCA0800S0048	CCA0678S0111	CCA0676S0091	CCA0674S0148	CCA0691S0135	CCA0795S0045	CCA0716S0035	CCA0806S0050	CCA0587S0213	CCA0661S0001	CCA0774S0017
CCA0743S0041	CCA0800S0049	CCA0678S0130	CCA0676S0116	CCA0674S0156	CCA0694S0004	CCA0795S0056	CCA0716S0062	CCA0806S0135	CCA0587S0221	CCA0662S0004	CCA0774S0027
CCA0743S0048	CCA0800S0062	CCA0678S0135	CCA0678S0020	CCA0674S0177	CCA0694S0022	CCA0795S0057	CCA0716S0064	CCA0806S0150	CCA0589S0006	CCA0662S0017	CCA0774S0028
CCA0746S0001	CCA0800S0083	CCA0678S0143	CCA0678S0026	CCA0674S0200	CCA0694S0024	CCA0795S0066	CCA0716S0078	CCA0806S0151	CCA0589S0024	CCA0662S0044	CCA0774S0039
CCA0747S0047	CCA0800S0107	CCA0678S0151	CCA0678S0034	CCA0674S0206	CCA0694S0042	CCA0795S0085	CCA0718S0008	CCA0810S0035	CCA0589S0027	CCA0662S0045	CCA0774S0040
CCA0747S0068	CCA0800S0132	CCA0678S0161	CCA0678S0043	CCA0674S0207	CCA0694S0048	CCA0799S0007	CCA0718S0017	CCA0810S0044	CCA0589S0031	CCA0662S0052	CCA0774S0059
CCA0748S0009	CCA0803S0014	CCA0678S0166	CCA0678S0062	CCA0676S0012	CCA0694S0070	CCA0799S0025	CCA0718S0033	CCA0810S0051	CCA0589S0052	CCA0662S0060	CCA0774S0070
CCA0748S0029	CCA0803S0026	CCA0678S0171	CCA0678S0066	CCA0676S0017	CCA0694S0071	CCA0799S0035	CCA0718S0053	CCA0810S0081	CCA0589S0088	CCA0662S0082	CCA0774S0093
CCA0748S0030	CCA0803S0027	CCA0678S0172	CCA0678S0122	CCA0676S0039	CCA0694S0075	CCA0799S0048	CCA0718S0054	CCA0812S0001	CCA0589S0099	CCA0662S0098	CCA0779S0002
CCA0748S0039	CCA0803S0075	CCA0678S0189	CCA0678S0154	CCA0676S0043	CCA0694S0083	CCA0799S0063	CCA0718S0064	CCA0813S0023	CCA0589S0126	CCA0662S0106	CCA0779S0025
CCA0748S0047	CCA0803S0087	CCA0678S0202	CCA0678S0168	CCA0676S0052	CCA0694S0084	CCA0799S0066	CCA0718S0098	CCA0813S0072	CCA0589S0224	CCA0662S0107	CCA0779S0028
CCA0748S0084	CCA0803S0088	CCA0678S0205	CCA0678S0181	CCA0676S0070	CCA0694S0100	CCA0799S0077	CCA0718S0110	CCA0813S0075	CCA0589S0229	CCA0662S0121	CCA0779S0063
CCA0748S0103	CCA0803S0094	CCA0679S0059	CCA0678S0190	CCA0676S0090	CCA0694S0104	CCA0799S0079	CCA0718S0115	CCA0813S0083	CCA0589S0231	CCA0662S0129	CCA0779S0076
CCA0749S0021	CCA0803S0096	CCA0679S0065	CCA0679S0050	CCA0676S0093	CCA0696S0015	CCA0799S0153	CCA0718S0117	CCA0813S0101	CCA0591S0021	CCA0662S0139	CCA0779S0102
CCA0749S0025	CCA0803S0099	CCA0679S0090	CCA0679S0085	CCA0676S0097	CCA0696S0044	CCA0799S0154	CCA0718S0149	CCA0816S0014	CCA0591S0029	CCA0662S0143	CCA0779S0133
CCA0749S0034	CCA0803S0104	CCA0679S0092	CCA0679S0086	CCA0678S0019	CCA0696S0054	CCA0800S0001	CCA0718S0150	CCA0816S0033	CCA0591S0036	CCA0665S0001	CCA0779S0139
CCA0749S0040	CCA0803S0121	CCA0679S0093	CCA0679S0089	CCA0678S0023	CCA0696S0059	CCA0800S0023	CCA0718S0156	CCA0816S0064	CCA0591S0038	CCA0665S0032	CCA0779S0167
CCA0749S0051	CCA0806S0013	CCA0679S0101	CCA0679S0143	CCA0678S0058	CCA0696S0062	CCA0800S0059	CCA0721S0048	CCA0816S0109	CCA0591S0101	CCA0665S0033	CCA0779S0214
CCA0754S0030	CCA0806S0026	CCA0679S0115	CCA0679S0144	CCA0678S0091	CCA0696S0081	CCA0800S0065	CCA0724S0023	CCA0818S0001	CCA0591S0102	CCA0665S0034	CCA0779S0221
CCA0754S0037	CCA0806S0063	CCA0679S0125	CCA0680S0029	CCA0678S0095	CCA0696S0092	CCA0800S0067	CCA0724S0040	CCA0819S0043	CCA0591S0108	CCA0665S0035	CCA0779S0235
CCA0754S0046	CCA0806S0069	CCA0679S0153	CCA0680S0054	CCA0678S0100	CCA0696S0099	CCA0800S0074	CCA0724S0041	CCA0819S0062	CCA0591S0111	CCA0665S0066	CCA0779S0238
CCA0754S0057	CCA0806S0084	CCA0680S0013	CCA0680S0056	CCA0678S0108	CCA0696S0113	CCA0800S0077	CCA0724S0049	CCA0819S0075	CCA0591S0114	CCA0670S0041	CCA0779S0261
CCA0754S0066	CCA0806S0090	CCA0680S0024	CCA0680S0099	CCA0678S0112	CCA0698S0006	CCA0800S0091	CCA0724S0061	CCA0824S0021	CCA0591S0124	CCA0670S0053	CCA0779S0267
CCA0754S0071	CCA0806S0111	CCA0680S0039	CCA0680S0104	CCA0678S0129	CCA0698S0054	CCA0800S0104	CCA0724S0066	CCA0824S0028	CCA0591S0132	CCA0670S0055	CCA0781S0016
CCA0754S0111	CCA0806S0142	CCA0680S0063	CCA0680S0149	CCA0678S0133	CCA0698S0070	CCA0800S0111	CCA0724S0069	CCA0824S0040	CCA0591S0135	CCA0670S0075	CCA0781S0073
CCA0754S0160	CCA0810S0055	CCA0680S0066	CCA0681S0020	CCA0678S0163	CCA0698S0086	CCA0800S0119	CCA0733S0001	CCA0824S0055	CCA0591S0138	CCA0670S0091	CCA0782S0034
CCA0754S0174	CCA0810S0071	CCA0680S0070	CCA0681S0031	CCA0678S0175	CCA0698S0098	CCA0800S0124	CCA0733S0031	CCA0824S0071	CCA0591S0141	CCA0670S0098	CCA0782S0049
CCA0757S0054	CCA0810S0084	CCA0680S0081	CCA0681S0049	CCA0678S0178	CCA0698S0127	CCA0800S0138	CCA0733S0049	CCA0824S0072	CCA0591S0147	CCA0670S0113	CCA0782S0050
CCA0757S0082	CCA0810S0087	CCA0680S0083	CCA0681S0052	CCA0678S0197	CCA0698S0159	CCA0800S0146	CCA0733S0050	CCA0824S0096	CCA0591S0150	CCA0670S0143	CCA0782S0053
CCA0757S0111	CCA0810S0103	CCA0680S0102	CCA0681S0087	CCA0679S0008	CCA0698S0166	CCA0803S0022	CCA0733S0062	CCA0826S0019	CCA0595S0021	CCA0674S0014	CCA0782S0086
CCA0762S0028	CCA0813S0028	CCA0680S0111	CCA0681S0097	CCA0679S0045	CCA0698S0167	CCA0803S0028	CCA0733S0076	CCA0826S0052	CCA0595S0071	CCA0674S0021	CCA0782S0091
CCA0762S0055	CCA0813S0034	CCA0680S0145	CCA0686S0020	CCA0679S0046	CCA0698S0198	CCA0803S0029	CCA0733S0089	CCA0826S0058	CCA0595S0077	CCA0674S0025	CCA0782S0096
CCA0763S0002	CCA0813S0059	CCA0681S0026	CCA0686S0034	CCA0679S0081	CCA0698S0200	CCA0803S0041	CCA0733S0098	CCA0828S0024	CCA0595S0080	CCA0674S0027	CCA0782S0118
CCA0763S0028	CCA0816S0003	CCA0681S0030	CCA0686S0051	CCA0679S0084	CCA0698S0211	CCA0803S0078	CCA0733S0121	CCA0828S0040	CCA0595S0097	CCA0674S0032	CCA0782S0133
CCA0763S0043	CCA0816S0006	CCA0681S0036	CCA0686S0073	CCA0679S0104	CCA0698S0221	CCA0803S0113	CCA0733S0131	CCA0828S0042	CCA0595S0107	CCA0674S0033	CCA0782S0176
CCA0763S0076	CCA0816S0035	CCA0681S0039	CCA0686S0088	CCA0679S0107	CCA0700S0023	CCA0806S0051	CCA0733S0135	CCA0828S0056	CCA0595S0117	CCA0674S0034	CCA0784S0044
CCA0763S0079	CCA0816S0038	CCA0681S0072	CCA0686S0102	CCA0679S0117	CCA0700S0026	CCA0806S0052	CCA0736S0016	CCA0828S0085	CCA0595S0123	CCA0674S0036	CCA0784S0045
CCA0763S0082	CCA0816S0039	CCA0686S0012	CCA0686S0103	CCA0679S0124	CCA0700S0067	CCA0806S0058	CCA0736S0066	CCA0829S0036	CCA0595S0136	CCA0674S0047	CCA0784S0086
CCA0764S0002	CCA0816S0044	CCA0686S0052	CCA0686S0105	CCA0679S0134	CCA0700S0091	CCA0806S0061	CCA0736S0070	CCA0829S0059	CCA0597S0006	CCA0674S0052	CCA0784S0091
CCA0765S0009	CCA0816S0054	CCA0686S0057	CCA0688S0009	CCA0679S0152	CCA0700S0101	CCA0806S0077	CCA0736S0072	CCA0829S0081	CCA0597S0036	CCA0674S0054	CCA0784S0104
CCA0765S0011	CCA0816S0062	CCA0688S0008	CCA0688S0055	CCA0679S0156	CCA0700S0113	CCA0806S0085	CCA0737S0028	CCA0829S0089	CCA0597S0073	CCA0674S0058	CCA0784S0125
CCA0765S0015	CCA0816S0080	CCA0688S0045	CCA0691S0010	CCA0680S0047	CCA0700S0115	CCA0806S0089	CCA0737S0038	CCA0831S0019	CCA0597S0104	CCA0674S0085	CCA0784S0131
CCA0765S0043	CCA0816S0088	CCA0688S0049	CCA0691S0039	CCA0680S0048	CCA0700S0118	CCA0806S0101	CCA0737S0041	CCA0834S0016	CCA0597S0106	CCA0674S0135	CCA0786S0001
CCA0765S0044	CCA0816S0111	CCA0691S0038	CCA0691S0040	CCA0680S0071	CCA0701S0004	CCA0806S0132	CCA0737S0079	CCA0836S0022	CCA0597S0133	CCA0674S0138	CCA0786S0012
CCA0765S0052	CCA0816S0147	CCA0691S0041	CCA0691S0043	CCA0680S0072	CCA0701S0011	CCA0806S0136	CCA0737S0087	CCA0836S0033	CCA0597S0149	CCA0674S0142	CCA0786S0046
CCA0765S0068	CCA0816S0148	CCA0691S0045	CCA0691S0107	CCA0680S0085	CCA0701S0016	CCA0806S0141	CCA0743S0033	CCA0836S0034	CCA0597S0170	CCA0674S0160	CCA0789S0002
CCA0765S0075	CCA0817S0001	CCA0691S0053	CCA0691S0134	CCA0680S0089	CCA0701S0038	CCA0810S0030	CCA0743S0035	CCA0836S0041	CCA0597S0182	CCA0674S0163	CCA0789S0007
CCA0765S0104	CCA0819S0021	CCA0691S0055	CCA0694S0019	CCA0680S0091	CCA0701S0039	CCA0810S0031	CCA0743S0057	CCA0836S0048	CCA0597S0202	CCA0674S0181	CCA0789S0011
CCA0770S0001	CCA0822S0019	CCA0691S0060	CCA0694S0040	CCA0680S0122	CCA0701S0049	CCA0810S0114	CCA0747S0018	CCA0836S0076	CCA0598S0004	CCA0674S0190	CCA0789S0015
CCA0773S0001	CCA0822S0032	CCA0691S0125	CCA0696S0002	CCA0680S0125	CCA0701S0059	CCA0810S0116	CCA0747S0066	CCA0836S0083	CCA0598S0005	CCA0674S0191	CCA0789S0027
CCA0774S0008	CCA0822S0072	CCA0691S0126	CCA0696S0051	CCA0681S0021	CCA0701S0066	CCA0810S0117	CCA0748S0062	CCA0836S0096	CCA0598S0006	CCA0674S0192	CCA0789S0063
CCA0774S0009	CCA0822S0087	CCA0691S0128	CCA0698S0023	CCA0681S0024	CCA0701S0077	CCA0810S0124	CCA0748S0068	CCA0837S0001	CCA0598S0025	CCA0674S0198	CCA0789S0081
CCA0774S0012	CCA0824S0002	CCA0691S0131	CCA0698S0083	CCA0681S0056	CCA0701S0084	CCA0813S0011	CCA0748S0091	CCA0838S0018	CCA0598S0040	CCA0674S0209	CCA0789S0086
CCA0774S0014	CCA0824S0035	CCA0691S0132	CCA0698S0090	CCA0681S0063	CCA0701S0098	CCA0813S0014	CCA0749S0019	CCA0838S0041	CCA0598S0065	CCA0676S0027	CCA0789S0107
CCA0774S0045	CCA0824S0058	CCA0694S0014	CCA0698S0099	CCA0681S0098	CCA0701S0130	CCA0813S0047	CCA0754S0008	CCA0839S0063	CCA0598S0076	CCA0676S0037	CCA0789S0108
CCA0774S0047	CCA0825S0001	CCA0694S0028	CCA0698S0114	CCA0683S0001	CCA0701S0142	CCA0813S0070	CCA0754S0010	CCA0839S0085	CCA0598S0100	CCA0676S0050	CCA0789S0109
CCA0774S0062	CCA0826S0037	CCA0694S0049	CCA0698S0160	CCA0686S0006	CCA0701S0156	CCA0816S0005	CCA0754S0014	CCA0839S0119	CCA0598S0123	CCA0676S0054	CCA0789S0111
CCA0774S0071	CCA0826S0060	CCA0694S0056	CCA0698S0180	CCA0686S0035	CCA0701S0158	CCA0816S0017	CCA0754S0028	CCA0839S0144	CCA0601S0012	CCA0676S0061	CCA0789S0128
CCA0779S0005	CCA0826S0068	CCA0694S0058	CCA0698S0192	CCA0686S0042	CCA0704S0024	CCA0816S0024	CCA0754S0052	CCA0839S0160	CCA0601S0033	CCA0676S0065	CCA0789S0147
CCA0779S0044	CCA0826S0079	CCA0694S0062	CCA0698S0204	CCA0686S0058	CCA0704S0034	CCA0816S0028	CCA0754S0077	CCA0839S0162	CCA0601S0057	CCA0676S0105	CCA0791S0017
CCA0779S0059	CCA0826S0080	CCA0694S0072	CCA0700S0010	CCA0686S0065	CCA0704S0042	CCA0816S0029	CCA0754S0109	CCA0842S0001	CCA0601S0070	CCA0676S0121	CCA0791S0023
CCA0779S0086	CCA0828S0013	CCA0696S0001	CCA0700S0022	CCA0686S0069	CCA0704S0061	CCA0816S0032	CCA0754S0110	CCA0842S0006	CCA0601S0071	CCA0676S0132	CCA0791S0027
CCA0779S0107	CCA0828S0018	CCA0696S0016	CCA0700S0076	CCA0686S0097	CCA0704S0087	CCA0816S0082	CCA0754S0115	CCA0842S0025	CCA0601S0111	CCA0678S0028	CCA0791S0034
CCA0779S0108	CCA0828S0026	CCA0696S0047	CCA0700S0084	CCA0687S0001	CCA0704S0088	CCA0816S0096	CCA0754S0129	CCA0842S0029	CCA0601S0118	CCA0678S0029	CCA0795S0015
CCA0779S0125	CCA0828S0027	CCA0696S0053	CCA0700S0114	CCA0688S0010	CCA0704S0103	CCA0816S0112	CCA0754S0132	CCA0843S0003	CCA0605S0013	CCA0678S0037	CCA0795S0035
CCA0779S0147	CCA0828S0046	CCA0696S0070	CCA0700S0120	CCA0688S0026	CCA0704S0123	CCA0816S0128	CCA0754S0133	CCA0844S0006	CCA0605S0026	CCA0678S0056	CCA0795S0069
CCA0779S0151	CCA0828S0069	CCA0696S0074	CCA0700S0122	CCA0688S0035	CCA0704S0140	CCA0816S0130	CCA0754S0161	CCA0848S0015	CCA0605S0027	CCA0678S0067	CCA0799S0010
CCA0779S0154	CCA0829S0001	CCA0696S0088	CCA0701S0019	CCA0688S0093	CCA0704S0149	CCA0816S0136	CCA0754S0171	CCA0848S0034	CCA0605S0028	CCA0678S0071	CCA0799S0043
CCA0779S0179	CCA0829S0031	CCA0696S0090	CCA0701S0031	CCA0688S0094	CCA0704S0152	CCA0816S0146	CCA0757S0001	CCA0848S0040	CCA0605S0039	CCA0678S0075	CCA0799S0064
CCA0779S0197	CCA0829S0048	CCA0698S0027	CCA0701S0047	CCA0691S0001	CCA0704S0163	CCA0816S0155	CCA0757S0030	CCA0848S0042	CCA0605S0052	CCA0678S0081	CCA0799S0065
CCA0779S0226	CCA0829S0052	CCA0698S0073	CCA0701S0051	CCA0691S0005	CCA0705S0004	CCA0819S0018	CCA0757S0037	CCA0848S0048	CCA0605S0068	CCA0678S0085	CCA0799S0068
CCA0779S0233	CCA0829S0097	CCA0698S0091	CCA0701S0057	CCA0691S0023	CCA0705S0014	CCA0822S0004	CCA0757S0064	CCA0848S0082	CCA0605S0071	CCA0678S0101	CCA0799S0069
CCA0779S0268	CCA0831S0001	CCA0698S0093	CCA0701S0062	CCA0691S0058	CCA0705S0025	CCA0822S0006	CCA0757S0074	CCA0848S0113	CCA0605S0073	CCA0678S0106	CCA0799S0075
CCA0781S0067	CCA0831S0005	CCA0698S0096	CCA0701S0111	CCA0691S0062	CCA0705S0040	CCA0822S0058	CCA0757S0076	CCA0849S0006	CCA0605S0075	CCA0678S0109	CCA0799S0098
CCA0782S0021	CCA0831S0006	CCA0698S0111	CCA0701S0117	CCA0691S0130	CCA0705S0045	CCA0822S0059	CCA0762S0008	CCA0849S0032	CCA0605S0114	CCA0678S0110	CCA0799S0114
CCA0782S0026	CCA0831S0041	CCA0698S0149	CCA0701S0122	CCA0694S0001	CCA0705S0073	CCA0822S0085	CCA0762S0020	CCA0849S0044	CCA0607S0022	CCA0678S0116	CCA0799S0129
CCA0782S0041	CCA0831S0065	CCA0698S0170	CCA0701S0137	CCA0694S0008	CCA0705S0091	CCA0824S0019	CCA0762S0035	CCA0849S0048	CCA0607S0027	CCA0678S0127	CCA0799S0142
CCA0782S0052	CCA0836S0073	CCA0698S0175	CCA0701S0150	CCA0694S0050	CCA0705S0101	CCA0824S0069	CCA0762S0044	CCA0851S0032	CCA0607S0046	CCA0678S0131	CCA0799S0149
CCA0782S0081	CCA0836S0079	CCA0698S0185	CCA0704S0014	CCA0694S0061	CCA0708S0003	CCA0826S0031	CCA0762S0058	CCA0851S0041	CCA0607S0068	CCA0678S0132	CCA0799S0155
CCA0782S0098	CCA0836S0082	CCA0698S0201	CCA0704S0030	CCA0694S0067	CCA0708S0012	CCA0826S0063	CCA0763S0011	CCA0851S0045	CCA0607S0079	CCA0678S0139	CCA0799S0158
CCA0782S0129	CCA0836S0093	CCA0698S0205	CCA0704S0069	CCA0694S0076	CCA0708S0029	CCA0828S0023	CCA0763S0041	CCA0851S0051	CCA0607S0088	CCA0678S0145	CCA0799S0167
CCA0782S0131	CCA0836S0097	CCA0698S0217	CCA0704S0070	CCA0694S0099	CCA0708S0035	CCA0828S0070	CCA0763S0083	CCA0851S0090	CCA0607S0094	CCA0678S0153	CCA0799S0169
CCA0782S0140	CCA0836S0098	CCA0698S0236	CCA0704S0091	CCA0694S0103	CCA0708S0036	CCA0829S0077	CCA0765S0069	CCA0851S0114	CCA0609S0002	CCA0678S0155	CCA0799S0179
CCA0782S0170	CCA0838S0020	CCA0700S0063	CCA0704S0116	CCA0696S0007	CCA0708S0052	CCA0831S0004	CCA0765S0079	CCA0851S0146	CCA0610S0024	CCA0678S0157	CCA0800S0013
CCA0784S0002	CCA0838S0092	CCA0701S0012	CCA0704S0136	CCA0696S0017	CCA0708S0067	CCA0831S0044	CCA0765S0088	CCA0851S0162	CCA0610S0033	CCA0678S0173	CCA0800S0019
CCA0784S0012	CCA0838S0097	CCA0701S0023	CCA0704S0141	CCA0696S0040	CCA0708S0088	CCA0831S0051	CCA0765S0102	CCA0851S0215	CCA0613S0040	CCA0678S0177	CCA0800S0028
CCA0784S0014	CCA0838S0099	CCA0701S0032	CCA0704S0165	CCA0696S0071	CCA0709S0014	CCA0831S0058	CCA0765S0111	CCA0854S0007	CCA0613S0058	CCA0678S0179	CCA0800S0036
CCA0784S0025	CCA0839S0019	CCA0701S0033	CCA0704S0166	CCA0696S0076	CCA0709S0016	CCA0831S0059	CCA0770S0015	CCA0854S0023	CCA0613S0073	CCA0678S0199	CCA0800S0050
CCA0784S0028	CCA0839S0021	CCA0701S0036	CCA0705S0003	CCA0696S0085	CCA0709S0040	CCA0831S0072	CCA0770S0032	CCA0854S0048	CCA0616S0014	CCA0679S0009	CCA0800S0095
CCA0784S0040	CCA0839S0022	CCA0701S0073	CCA0705S0026	CCA0696S0095	CCA0709S0041	CCA0831S0074	CCA0774S0024	CCA0854S0093	CCA0616S0021	CCA0679S0011	CCA0800S0096
CCA0784S0061	CCA0839S0028	CCA0701S0128	CCA0705S0037	CCA0698S0029	CCA0709S0047	CCA0834S0010	CCA0774S0041	CCA0854S0114	CCA0616S0066	CCA0679S0038	CCA0800S0099
CCA0784S0123	CCA0839S0029	CCA0701S0136	CCA0705S0072	CCA0698S0030	CCA0709S0058	CCA0836S0035	CCA0774S0044	CCA0857S0047	CCA0616S0075	CCA0679S0047	CCA0800S0100
CCA0784S0133	CCA0839S0034	CCA0704S0036	CCA0705S0094	CCA0698S0042	CCA0709S0072	CCA0836S0103	CCA0774S0057	CCA0857S0061	CCA0616S0108	CCA0679S0078	CCA0800S0147
CCA0784S0177	CCA0839S0128	CCA0704S0060	CCA0708S0004	CCA0698S0048	CCA0709S0077	CCA0836S0112	CCA0774S0061	CCA0859S0008	CCA0616S0165	CCA0679S0087	CCA0803S0023
CCA0784S0179	CCA0839S0150	CCA0704S0066	CCA0708S0007	CCA0698S0051	CCA0709S0079	CCA0836S0113	CCA0779S0004	CCA0859S0013	CCA0616S0166	CCA0679S0099	CCA0803S0031
CCA0786S0036	CCA0839S0171	CCA0704S0086	CCA0708S0046	CCA0698S0068	CCA0716S0017	CCA0838S0051	CCA0779S0010	CCA0859S0024	CCA0620S0028	CCA0679S0102	CCA0803S0066
CCA0786S0042	CCA0843S0100	CCA0704S0101	CCA0708S0050	CCA0698S0082	CCA0716S0024	CCA0838S0086	CCA0779S0015	CCA0859S0079	CCA0620S0042	CCA0679S0118	CCA0803S0097
CCA0789S0004	CCA0844S0047	CCA0704S0174	CCA0708S0051	CCA0698S0102	CCA0716S0046	CCA0839S0006	CCA0779S0033	CCA0859S0171	CCA0623S0067	CCA0679S0119	CCA0803S0130
CCA0789S0024	CCA0844S0057	CCA0705S0019	CCA0708S0053	CCA0698S0113	CCA0716S0054	CCA0839S0011	CCA0779S0041	CCA0859S0184	CCA0623S0081	CCA0679S0126	CCA0803S0134
CCA0789S0049	CCA0848S0033	CCA0705S0020	CCA0708S0056	CCA0698S0146	CCA0718S0005	CCA0839S0016	CCA0779S0079	CCA0859S0191	CCA0623S0087	CCA0679S0127	CCA0805S0001
CCA0789S0079	CCA0848S0039	CCA0705S0021	CCA0708S0066	CCA0698S0152	CCA0718S0007	CCA0839S0023	CCA0779S0084	CCA0861S0004	CCA0623S0090	CCA0679S0149	CCA0806S0014
CCA0789S0089	CCA0848S0054	CCA0705S0022	CCA0708S0106	CCA0698S0176	CCA0718S0009	CCA0839S0067	CCA0779S0085	CCA0861S0042	CCA0623S0096	CCA0680S0012	CCA0806S0023
CCA0789S0138	CCA0848S0066	CCA0705S0031	CCA0708S0126	CCA0698S0178	CCA0718S0014	CCA0839S0080	CCA0779S0096	CCA0862S0067	CCA0623S0104	CCA0680S0025	CCA0806S0024
CCA0789S0144	CCA0848S0077	CCA0705S0059	CCA0709S0002	CCA0698S0181	CCA0718S0050	CCA0839S0092	CCA0779S0120	CCA0862S0107	CCA0623S0114	CCA0680S0042	CCA0806S0034
CCA0789S0145	CCA0848S0088	CCA0705S0067	CCA0709S0011	CCA0698S0191	CCA0718S0059	CCA0839S0096	CCA0779S0146	CCA0862S0113	CCA0623S0121	CCA0680S0045	CCA0806S0040
CCA0791S0020	CCA0849S0018	CCA0705S0068	CCA0709S0018	CCA0698S0199	CCA0718S0090	CCA0839S0142	CCA0779S0158	CCA0869S0073	CCA0623S0148	CCA0680S0049	CCA0806S0057
CCA0791S0022	CCA0849S0020	CCA0705S0092	CCA0709S0050	CCA0698S0225	CCA0718S0093	CCA0839S0173	CCA0779S0162	CCA0870S0012	CCA0625S0001	CCA0680S0050	CCA0806S0071
CCA0791S0038	CCA0849S0027	CCA0705S0106	CCA0709S0076	CCA0698S0232	CCA0718S0119	CCA0842S0021	CCA0779S0166	CCA0870S0043	CCA0627S0021	CCA0680S0088	CCA0806S0072
CCA0791S0060	CCA0849S0056	CCA0708S0005	CCA0709S0083	CCA0698S0238	CCA0718S0124	CCA0842S0022	CCA0779S0193	CCA0874S0041	CCA0627S0033	CCA0680S0093	CCA0806S0094
CCA0791S0085	CCA0849S0059	CCA0708S0037	CCA0709S0102	CCA0700S0013	CCA0718S0125	CCA0842S0023	CCA0779S0194	CCA0874S0042	CCA0627S0036	CCA0680S0097	CCA0806S0096
CCA0795S0004	CCA0851S0008	CCA0708S0059	CCA0709S0110	CCA0700S0042	CCA0718S0127	CCA0842S0024	CCA0779S0206	CCA0874S0045	CCA0627S0055	CCA0680S0119	CCA0806S0121
CCA0795S0009	CCA0851S0021	CCA0708S0069	CCA0711S0004	CCA0700S0059	CCA0718S0144	CCA0843S0022	CCA0779S0237	CCA0874S0052	CCA0627S0062	CCA0680S0124	CCA0806S0122
CCA0795S0013	CCA0851S0033	CCA0708S0087	CCA0711S0007	CCA0700S0069	CCA0718S0146	CCA0843S0023	CCA0779S0242	CCA0874S0059	CCA0627S0071	CCA0680S0167	CCA0806S0124
CCA0795S0031	CCA0851S0042	CCA0708S0099	CCA0715S0002	CCA0700S0074	CCA0721S0020	CCA0843S0076	CCA0781S0041	CCA0876S0020	CCA0627S0076	CCA0681S0016	CCA0806S0137
CCA0795S0036	CCA0851S0065	CCA0708S0104	CCA0716S0009	CCA0700S0079	CCA0721S0040	CCA0844S0001	CCA0782S0020	CCA0876S0027	CCA0628S0014	CCA0681S0025	CCA0806S0149
CCA0795S0041	CCA0851S0074	CCA0709S0003	CCA0716S0048	CCA0700S0080	CCA0721S0055	CCA0844S0030	CCA0782S0022	CCA0876S0029	CCA0628S0022	CCA0681S0029	CCA0810S0020
CCA0795S0044	CCA0851S0103	CCA0709S0008	CCA0716S0057	CCA0700S0130	CCA0722S0001	CCA0846S0030	CCA0782S0033	CCA0876S0030	CCA0628S0044	CCA0681S0075	CCA0810S0038
CCA0795S0083	CCA0851S0142	CCA0709S0010	CCA0716S0075	CCA0701S0018	CCA0724S0009	CCA0848S0026	CCA0782S0047	CCA0876S0035	CCA0628S0046	CCA0686S0029	CCA0810S0090
CCA0795S0098	CCA0851S0156	CCA0709S0022	CCA0718S0006	CCA0701S0040	CCA0724S0019	CCA0848S0029	CCA0782S0048	CCA0876S0053	CCA0628S0073	CCA0686S0030	CCA0810S0107
CCA0797S0001	CCA0851S0187	CCA0709S0026	CCA0718S0011	CCA0701S0041	CCA0724S0057	CCA0848S0044	CCA0782S0056	CCA0877S0033	CCA0631S0003	CCA0686S0037	CCA0813S0033
CCA0799S0019	CCA0851S0200	CCA0709S0029	CCA0718S0016	CCA0701S0055	CCA0724S0063	CCA0848S0059	CCA0782S0066	CCA0877S0052	CCA0632S0003	CCA0686S0044	CCA0813S0046
CCA0799S0020	CCA0851S0202	CCA0709S0067	CCA0718S0043	CCA0701S0076	CCA0724S0068	CCA0848S0072	CCA0782S0077	CCA0879S0047	CCA0632S0006	CCA0686S0046	CCA0813S0049
CCA0799S0031	CCA0852S0074	CCA0709S0068	CCA0718S0052	CCA0701S0081	CCA0729S0023	CCA0848S0079	CCA0782S0080	CCA0879S0055	CCA0632S0012	CCA0686S0053	CCA0813S0057
CCA0799S0033	CCA0852S0086	CCA0709S0084	CCA0718S0056	CCA0701S0083	CCA0733S0017	CCA0848S0080	CCA0782S0095	CCA0879S0061	CCA0632S0017	CCA0686S0060	CCA0813S0073
CCA0799S0046	CCA0853S0015	CCA0709S0090	CCA0718S0101	CCA0701S0104	CCA0733S0027	CCA0848S0104	CCA0782S0139	CCA0879S0065	CCA0632S0028	CCA0686S0077	CCA0813S0081
CCA0799S0051	CCA0853S0031	CCA0709S0103	CCA0718S0105	CCA0701S0124	CCA0733S0030	CCA0848S0106	CCA0782S0145	CCA0879S0097	CCA0632S0036	CCA0686S0094	CCA0813S0082
CCA0799S0086	CCA0853S0032	CCA0710S0002	CCA0718S0113	CCA0701S0145	CCA0733S0035	CCA0849S0042	CCA0784S0010	CCA0881S0017	CCA0632S0037	CCA0686S0095	CCA0813S0088
CCA0799S0092	CCA0854S0009	CCA0710S0003	CCA0718S0114	CCA0701S0152	CCA0733S0037	CCA0849S0043	CCA0784S0015	CCA0881S0020	CCA0632S0038	CCA0688S0011	CCA0816S0015
CCA0799S0094	CCA0854S0021	CCA0711S0001	CCA0718S0121	CCA0704S0016	CCA0733S0044	CCA0849S0057	CCA0784S0018	CCA0881S0060	CCA0632S0041	CCA0688S0012	CCA0816S0022
CCA0799S0112	CCA0854S0035	CCA0711S0011	CCA0718S0132	CCA0704S0041	CCA0733S0054	CCA0851S0009	CCA0784S0032	CCA0881S0092	CCA0632S0042	CCA0688S0039	CCA0816S0023
CCA0799S0130	CCA0854S0078	CCA0711S0032	CCA0718S0136	CCA0704S0075	CCA0733S0058	CCA0851S0028	CCA0784S0041	CCA0883S0009	CCA0632S0059	CCA0688S0046	CCA0816S0049
CCA0799S0133	CCA0854S0097	CCA0711S0044	CCA0718S0145	CCA0704S0076	CCA0733S0101	CCA0851S0038	CCA0784S0050	CCA0883S0028	CCA0632S0091	CCA0688S0051	CCA0816S0055
CCA0799S0144	CCA0854S0115	CCA0711S0050	CCA0719S0001	CCA0704S0095	CCA0733S0108	CCA0851S0082	CCA0784S0060	CCA0883S0047	CCA0632S0094	CCA0688S0052	CCA0816S0066
CCA0799S0157	CCA0857S0006	CCA0716S0016	CCA0721S0005	CCA0704S0097	CCA0733S0111	CCA0851S0083	CCA0784S0068	CCA0884S0029	CCA0632S0104	CCA0688S0054	CCA0816S0067
CCA0799S0178	CCA0857S0017	CCA0716S0023	CCA0721S0017	CCA0704S0117	CCA0733S0112	CCA0851S0086	CCA0784S0087	CCA0884S0036	CCA0632S0112	CCA0688S0076	CCA0816S0106
CCA0800S0003	CCA0857S0027	CCA0716S0031	CCA0721S0021	CCA0704S0125	CCA0736S0042	CCA0851S0110	CCA0784S0108	CCA0884S0038	CCA0632S0131	CCA0688S0084	CCA0816S0143
CCA0800S0020	CCA0857S0030	CCA0716S0041	CCA0721S0024	CCA0704S0147	CCA0736S0047	CCA0851S0112	CCA0784S0115	CCA0884S0053	CCA0632S0143	CCA0688S0088	CCA0816S0156
CCA0800S0032	CCA0857S0032	CCA0716S0070	CCA0721S0053	CCA0704S0169	CCA0736S0071	CCA0851S0125	CCA0784S0120	CCA0884S0064	CCA0632S0148	CCA0691S0012	CCA0816S0157
CCA0800S0034	CCA0857S0073	CCA0716S0083	CCA0724S0014	CCA0705S0001	CCA0736S0081	CCA0851S0139	CCA0784S0124	CCA0884S0129	CCA0632S0191	CCA0691S0021	CCA0819S0061
CCA0800S0076	CCA0857S0076	CCA0718S0032	CCA0729S0022	CCA0705S0007	CCA0736S0086	CCA0851S0163	CCA0784S0145	CCA0884S0137	CCA0633S0001	CCA0691S0031	CCA0822S0008
CCA0800S0134	CCA0857S0081	CCA0718S0034	CCA0733S0012	CCA0705S0015	CCA0736S0092	CCA0851S0181	CCA0786S0011	CCA0884S0143	CCA0633S0002	CCA0691S0057	CCA0822S0009
CCA0800S0136	CCA0859S0005	CCA0718S0041	CCA0733S0021	CCA0705S0033	CCA0736S0093	CCA0851S0197	CCA0789S0012	CCA0884S0153	CCA0633S0024	CCA0691S0061	CCA0822S0022
CCA0803S0009	CCA0859S0038	CCA0718S0055	CCA0733S0036	CCA0705S0065	CCA0737S0003	CCA0851S0198	CCA0789S0019	CCA0884S0179	CCA0633S0027	CCA0691S0095	CCA0822S0060
CCA0803S0044	CCA0859S0046	CCA0718S0096	CCA0733S0042	CCA0705S0074	CCA0737S0008	CCA0851S0201	CCA0789S0023	CCA0884S0192	CCA0633S0030	CCA0691S0110	CCA0822S0067
CCA0803S0060	CCA0859S0102	CCA0718S0130	CCA0733S0052	CCA0705S0077	CCA0737S0018	CCA0851S0214	CCA0789S0041	CCA0884S0216	CCA0633S0038	CCA0691S0111	CCA0822S0090
CCA0803S0062	CCA0859S0107	CCA0718S0148	CCA0733S0057	CCA0705S0082	CCA0737S0020	CCA0851S0219	CCA0789S0061	CCA0886S0025	CCA0633S0040	CCA0691S0121	CCA0824S0070
CCA0803S0067	CCA0859S0136	CCA0718S0154	CCA0733S0065	CCA0708S0015	CCA0737S0037	CCA0852S0013	CCA0789S0080	CCA0886S0033	CCA0633S0045	CCA0692S0001	CCA0824S0108
CCA0803S0082	CCA0859S0155	CCA0721S0026	CCA0733S0090	CCA0708S0016	CCA0737S0053	CCA0852S0033	CCA0789S0090	CCA0886S0038	CCA0633S0046	CCA0694S0007	CCA0826S0009
CCA0803S0101	CCA0859S0157	CCA0721S0056	CCA0733S0095	CCA0708S0019	CCA0737S0076	CCA0852S0037	CCA0789S0091	CCA0886S0055	CCA0633S0061	CCA0694S0009	CCA0826S0041
CCA0803S0106	CCA0859S0178	CCA0724S0027	CCA0733S0097	CCA0708S0030	CCA0737S0088	CCA0852S0050	CCA0789S0092	CCA0887S0015	CCA0633S0081	CCA0694S0031	CCA0826S0042
CCA0803S0107	CCA0859S0179	CCA0724S0039	CCA0733S0118	CCA0708S0038	CCA0737S0089	CCA0852S0062	CCA0789S0093	CCA0887S0027	CCA0633S0091	CCA0694S0059	CCA0826S0053
CCA0803S0118	CCA0862S0017	CCA0724S0064	CCA0733S0122	CCA0708S0039	CCA0737S0094	CCA0852S0064	CCA0789S0096	CCA0887S0032	CCA0633S0107	CCA0694S0064	CCA0828S0037
CCA0806S0008	CCA0862S0019	CCA0729S0049	CCA0733S0142	CCA0708S0085	CCA0737S0095	CCA0853S0023	CCA0789S0097	CCA0887S0056	CCA0633S0109	CCA0696S0072	CCA0828S0038
CCA0806S0017	CCA0862S0029	CCA0733S0029	CCA0736S0002	CCA0708S0111	CCA0737S0097	CCA0854S0014	CCA0789S0098	CCA0887S0068	CCA0633S0112	CCA0696S0075	CCA0828S0083
CCA0806S0021	CCA0862S0031	CCA0733S0043	CCA0736S0018	CCA0708S0117	CCA0737S0123	CCA0854S0026	CCA0789S0104	CCA0887S0073	CCA0633S0114	CCA0696S0078	CCA0829S0030
CCA0806S0032	CCA0862S0032	CCA0733S0045	CCA0736S0046	CCA0708S0125	CCA0741S0001	CCA0854S0082	CCA0789S0127	CCA0887S0079	CCA0634S0005	CCA0697S0003	CCA0829S0032
CCA0806S0064	CCA0862S0042	CCA0733S0078	CCA0736S0073	CCA0709S0007	CCA0743S0047	CCA0854S0116	CCA0789S0131	CCA0887S0083	CCA0634S0012	CCA0698S0055	CCA0829S0053
CCA0806S0074	CCA0862S0117	CCA0733S0103	CCA0736S0074	CCA0709S0023	CCA0743S0052	CCA0857S0044	CCA0789S0134	CCA0887S0090	CCA0634S0013	CCA0698S0061	CCA0829S0054
CCA0806S0127	CCA0862S0135	CCA0733S0120	CCA0736S0076	CCA0709S0031	CCA0747S0002	CCA0857S0053	CCA0789S0153	CCA0890S0037	CCA0634S0018	CCA0698S0112	CCA0829S0056
CCA0810S0008	CCA0864S0001	CCA0733S0124	CCA0736S0091	CCA0709S0033	CCA0747S0025	CCA0857S0062	CCA0791S0089	CCA0890S0061	CCA0634S0046	CCA0698S0138	CCA0829S0066
CCA0810S0061	CCA0864S0012	CCA0736S0003	CCA0737S0002	CCA0709S0044	CCA0747S0034	CCA0859S0017	CCA0795S0001	CCA0890S0070	CCA0634S0080	CCA0698S0142	CCA0829S0072
CCA0810S0073	CCA0866S0040	CCA0736S0028	CCA0737S0022	CCA0709S0046	CCA0747S0043	CCA0859S0021	CCA0795S0048	CCA0891S0039	CCA0634S0082	CCA0698S0145	CCA0829S0079
CCA0810S0074	CCA0870S0019	CCA0736S0030	CCA0737S0039	CCA0709S0057	CCA0747S0045	CCA0859S0027	CCA0795S0059	CCA0892S0018	CCA0634S0083	CCA0698S0153	CCA0829S0101
CCA0811S0001	CCA0870S0020	CCA0736S0032	CCA0737S0040	CCA0709S0071	CCA0747S0063	CCA0859S0111	CCA0795S0088	CCA0892S0026	CCA0634S0087	CCA0698S0193	CCA0834S0030
CCA0813S0008	CCA0870S0051	CCA0736S0034	CCA0737S0046	CCA0709S0089	CCA0748S0005	CCA0859S0119	CCA0795S0089	CCA0894S0009	CCA0634S0095	CCA0698S0223	CCA0836S0037
CCA0813S0016	CCA0870S0053	CCA0736S0038	CCA0737S0050	CCA0709S0095	CCA0748S0007	CCA0859S0138	CCA0799S0009	CCA0894S0010	CCA0636S0001	CCA0698S0228	CCA0836S0042
CCA0813S0041	CCA0874S0009	CCA0736S0041	CCA0737S0092	CCA0711S0008	CCA0748S0010	CCA0859S0159	CCA0799S0034	CCA0894S0020	CCA0638S0014	CCA0700S0008	CCA0836S0067
CCA0813S0055	CCA0874S0035	CCA0736S0095	CCA0737S0099	CCA0711S0029	CCA0748S0012	CCA0859S0164	CCA0799S0067	CCA0897S0018	CCA0638S0030	CCA0700S0020	CCA0836S0072
CCA0813S0068	CCA0874S0043	CCA0736S0100	CCA0737S0101	CCA0711S0054	CCA0748S0055	CCA0859S0180	CCA0799S0141	CCA0897S0060	CCA0638S0049	CCA0700S0021	CCA0836S0077
CCA0813S0080	CCA0874S0067	CCA0737S0049	CCA0737S0102	CCA0716S0013	CCA0748S0086	CCA0859S0188	CCA0799S0143	CCA0897S0070	CCA0638S0088	CCA0700S0056	CCA0836S0116
CCA0813S0089	CCA0874S0068	CCA0737S0051	CCA0737S0122	CCA0716S0014	CCA0748S0088	CCA0861S0013	CCA0799S0148	CCA0897S0075	CCA0638S0108	CCA0700S0058	CCA0838S0053
CCA0813S0092	CCA0876S0034	CCA0737S0055	CCA0742S0002	CCA0716S0029	CCA0748S0107	CCA0862S0037	CCA0799S0170	CCA0897S0086	CCA0638S0110	CCA0700S0060	CCA0838S0075
CCA0816S0021	CCA0876S0045	CCA0737S0057	CCA0743S0026	CCA0716S0036	CCA0748S0110	CCA0862S0049	CCA0800S0016	CCA0897S0090	CCA0638S0122	CCA0700S0098	CCA0838S0077
CCA0816S0027	CCA0876S0047	CCA0737S0072	CCA0743S0037	CCA0716S0076	CCA0748S0124	CCA0862S0054	CCA0800S0041	CCA0897S0129	CCA0638S0124	CCA0700S0103	CCA0838S0102
CCA0816S0057	CCA0876S0069	CCA0737S0082	CCA0744S0001	CCA0716S0080	CCA0749S0048	CCA0862S0068	CCA0800S0068	CCA0897S0142	CCA0638S0144	CCA0700S0121	CCA0839S0013
CCA0816S0061	CCA0876S0083	CCA0737S0104	CCA0747S0006	CCA0718S0004	CCA0754S0017	CCA0862S0075	CCA0800S0078	CCA0897S0150	CCA0638S0145	CCA0701S0005	CCA0839S0017
CCA0816S0075	CCA0877S0032	CCA0737S0115	CCA0747S0024	CCA0718S0022	CCA0754S0022	CCA0862S0089	CCA0800S0086	CCA0898S0003	CCA0638S0156	CCA0701S0009	CCA0839S0031
CCA0819S0019	CCA0877S0060	CCA0743S0027	CCA0747S0028	CCA0718S0027	CCA0754S0043	CCA0862S0095	CCA0800S0110	CCA0898S0050	CCA0638S0157	CCA0701S0020	CCA0839S0035
CCA0819S0026	CCA0879S0007	CCA0743S0039	CCA0747S0033	CCA0718S0047	CCA0754S0082	CCA0862S0106	CCA0800S0135	CCA0898S0081	CCA0638S0185	CCA0701S0030	CCA0839S0039
CCA0819S0028	CCA0879S0044	CCA0743S0040	CCA0747S0035	CCA0718S0051	CCA0754S0085	CCA0862S0110	CCA0803S0005	CCA0898S0083	CCA0642S0013	CCA0701S0042	CCA0839S0043
CCA0819S0033	CCA0879S0064	CCA0743S0053	CCA0747S0036	CCA0718S0081	CCA0754S0088	CCA0862S0130	CCA0803S0018	CCA0898S0100	CCA0642S0054	CCA0701S0048	CCA0839S0082
CCA0819S0057	CCA0879S0077	CCA0747S0014	CCA0747S0046	CCA0718S0111	CCA0754S0118	CCA0864S0006	CCA0803S0036	CCA0898S0103	CCA0642S0058	CCA0701S0052	CCA0839S0087
CCA0819S0069	CCA0879S0095	CCA0747S0038	CCA0747S0065	CCA0718S0152	CCA0754S0123	CCA0864S0009	CCA0803S0047	CCA0899S0036	CCA0642S0061	CCA0701S0087	CCA0839S0107
CCA0822S0029	CCA0881S0032	CCA0747S0054	CCA0748S0031	CCA0724S0043	CCA0754S0126	CCA0869S0004	CCA0803S0057	CCA0899S0051	CCA0642S0063	CCA0701S0092	CCA0839S0125
CCA0822S0036	CCA0881S0033	CCA0748S0027	CCA0748S0046	CCA0729S0010	CCA0754S0130	CCA0870S0047	CCA0803S0079	CCA0899S0061	CCA0642S0074	CCA0701S0093	CCA0839S0140
CCA0822S0049	CCA0881S0065	CCA0748S0036	CCA0748S0069	CCA0729S0028	CCA0754S0142	CCA0874S0037	CCA0803S0093	CCA0899S0083	CCA0642S0079	CCA0701S0146	CCA0839S0143
CCA0822S0065	CCA0881S0078	CCA0748S0061	CCA0748S0109	CCA0733S0015	CCA0754S0156	CCA0874S0051	CCA0803S0112	CCA0899S0097	CCA0642S0088	CCA0701S0148	CCA0839S0145
CCA0822S0082	CCA0881S0099	CCA0748S0067	CCA0749S0016	CCA0733S0051	CCA0757S0024	CCA0874S0062	CCA0803S0120	CCA0903S0008	CCA0642S0089	CCA0701S0151	CCA0842S0026
CCA0824S0037	CCA0881S0104	CCA0748S0079	CCA0749S0045	CCA0733S0053	CCA0757S0025	CCA0876S0052	CCA0803S0122	CCA0903S0061	CCA0642S0092	CCA0701S0153	CCA0843S0001
CCA0824S0053	CCA0881S0115	CCA0748S0083	CCA0754S0040	CCA0733S0066	CCA0757S0027	CCA0876S0059	CCA0803S0127	CCA0904S0041	CCA0642S0095	CCA0703S0001	CCA0843S0050
CCA0824S0059	CCA0883S0015	CCA0748S0090	CCA0754S0044	CCA0733S0096	CCA0757S0033	CCA0876S0060	CCA0806S0048	CCA0904S0075	CCA0642S0097	CCA0704S0005	CCA0843S0081
CCA0824S0060	CCA0883S0021	CCA0748S0099	CCA0754S0048	CCA0733S0133	CCA0757S0042	CCA0877S0002	CCA0806S0055	CCA0904S0079	CCA0642S0141	CCA0704S0009	CCA0846S0008
CCA0824S0065	CCA0883S0022	CCA0748S0112	CCA0754S0050	CCA0733S0145	CCA0757S0048	CCA0877S0006	CCA0806S0059	CCA0904S0092	CCA0646S0004	CCA0704S0010	CCA0846S0049
CCA0824S0094	CCA0883S0048	CCA0748S0114	CCA0754S0081	CCA0736S0039	CCA0757S0057	CCA0877S0028	CCA0806S0082	CCA0904S0130	CCA0646S0011	CCA0704S0011	CCA0848S0010
CCA0824S0101	CCA0883S0053	CCA0748S0121	CCA0754S0094	CCA0736S0078	CCA0757S0062	CCA0877S0030	CCA0806S0083	CCA0904S0139	CCA0646S0012	CCA0704S0015	CCA0848S0060
CCA0824S0111	CCA0884S0033	CCA0749S0003	CCA0754S0122	CCA0737S0043	CCA0757S0090	CCA0879S0011	CCA0806S0100	CCA0904S0178	CCA0646S0018	CCA0704S0017	CCA0848S0076
CCA0826S0006	CCA0884S0042	CCA0749S0041	CCA0754S0128	CCA0737S0044	CCA0757S0093	CCA0879S0038	CCA0806S0103	CCA0904S0192	CCA0646S0022	CCA0704S0071	CCA0848S0087
CCA0826S0046	CCA0884S0060	CCA0754S0007	CCA0754S0131	CCA0737S0071	CCA0757S0097	CCA0879S0049	CCA0806S0104	CCA0904S0199	CCA0646S0126	CCA0704S0074	CCA0848S0118
CCA0826S0056	CCA0884S0119	CCA0754S0015	CCA0754S0134	CCA0743S0049	CCA0762S0013	CCA0879S0069	CCA0806S0126	CCA0905S0019	CCA0646S0131	CCA0704S0109	CCA0849S0008
CCA0826S0065	CCA0884S0154	CCA0754S0018	CCA0754S0141	CCA0743S0050	CCA0762S0025	CCA0879S0088	CCA0806S0128	CCA0905S0031	CCA0646S0133	CCA0704S0126	CCA0849S0030
CCA0826S0069	CCA0884S0165	CCA0754S0019	CCA0754S0146	CCA0743S0058	CCA0762S0048	CCA0879S0106	CCA0806S0139	CCA0905S0063	CCA0646S0135	CCA0704S0134	CCA0849S0039
CCA0827S0001	CCA0884S0188	CCA0754S0036	CCA0754S0172	CCA0747S0001	CCA0762S0053	CCA0881S0027	CCA0806S0145	CCA0905S0071	CCA0646S0136	CCA0704S0135	CCA0851S0019
CCA0828S0017	CCA0884S0201	CCA0754S0051	CCA0756S0002	CCA0747S0027	CCA0762S0057	CCA0881S0053	CCA0806S0154	CCA0905S0087	CCA0646S0171	CCA0704S0144	CCA0851S0020
CCA0828S0041	CCA0886S0019	CCA0754S0054	CCA0756S0003	CCA0747S0058	CCA0762S0079	CCA0881S0070	CCA0810S0013	CCA0905S0103	CCA0649S0009	CCA0704S0157	CCA0851S0025
CCA0828S0088	CCA0886S0026	CCA0754S0075	CCA0757S0010	CCA0747S0059	CCA0763S0001	CCA0881S0086	CCA0810S0022	CCA0905S0104	CCA0649S0018	CCA0705S0008	CCA0851S0030
CCA0829S0007	CCA0886S0044	CCA0754S0090	CCA0757S0035	CCA0748S0001	CCA0763S0003	CCA0883S0023	CCA0810S0078	CCA0906S0015	CCA0649S0019	CCA0705S0011	CCA0851S0055
CCA0829S0018	CCA0887S0048	CCA0754S0113	CCA0757S0058	CCA0748S0004	CCA0763S0033	CCA0883S0024	CCA0813S0053	CCA0906S0017	CCA0649S0038	CCA0705S0041	CCA0851S0091
CCA0829S0035	CCA0887S0102	CCA0754S0155	CCA0757S0059	CCA0748S0017	CCA0763S0036	CCA0883S0029	CCA0813S0054	CCA0906S0090	CCA0649S0040	CCA0705S0042	CCA0851S0096
CCA0829S0046	CCA0887S0119	CCA0754S0159	CCA0757S0061	CCA0748S0021	CCA0763S0039	CCA0883S0044	CCA0813S0063	CCA0906S0094	CCA0649S0057	CCA0705S0056	CCA0851S0126
CCA0829S0050	CCA0887S0125	CCA0757S0031	CCA0757S0063	CCA0748S0026	CCA0763S0061	CCA0883S0049	CCA0813S0064	CCA0907S0062	CCA0649S0058	CCA0705S0057	CCA0851S0128
CCA0829S0061	CCA0887S0127	CCA0757S0079	CCA0757S0098	CCA0748S0028	CCA0764S0001	CCA0883S0054	CCA0813S0103	CCA0907S0083	CCA0649S0059	CCA0705S0058	CCA0851S0131
CCA0831S0037	CCA0888S0027	CCA0757S0080	CCA0760S0001	CCA0748S0037	CCA0765S0010	CCA0883S0061	CCA0816S0004	CCA0907S0096	CCA0649S0064	CCA0705S0062	CCA0851S0140
CCA0831S0040	CCA0888S0046	CCA0757S0083	CCA0762S0002	CCA0748S0038	CCA0765S0036	CCA0884S0019	CCA0816S0009	CCA0909S0025	CCA0649S0094	CCA0705S0064	CCA0851S0152
CCA0831S0049	CCA0888S0048	CCA0757S0088	CCA0762S0027	CCA0748S0070	CCA0765S0064	CCA0884S0046	CCA0816S0013	CCA0909S0026	CCA0649S0097	CCA0705S0066	CCA0851S0172
CCA0831S0061	CCA0890S0022	CCA0757S0100	CCA0762S0031	CCA0748S0078	CCA0765S0077	CCA0884S0047	CCA0816S0074	CCA0909S0038	CCA0649S0101	CCA0705S0086	CCA0851S0175
CCA0834S0006	CCA0890S0026	CCA0757S0106	CCA0762S0038	CCA0748S0085	CCA0765S0078	CCA0884S0049	CCA0816S0084	CCA0909S0082	CCA0649S0103	CCA0708S0018	CCA0851S0186
CCA0834S0041	CCA0890S0036	CCA0762S0005	CCA0762S0049	CCA0748S0097	CCA0765S0092	CCA0884S0061	CCA0816S0087	CCA0909S0086	CCA0649S0109	CCA0708S0025	CCA0851S0189
CCA0836S0015	CCA0890S0058	CCA0762S0021	CCA0762S0050	CCA0749S0001	CCA0770S0007	CCA0884S0063	CCA0816S0091	CCA0909S0095	CCA0652S0004	CCA0708S0057	CCA0851S0203
CCA0836S0016	CCA0890S0063	CCA0762S0033	CCA0763S0013	CCA0749S0004	CCA0774S0005	CCA0884S0065	CCA0816S0121	CCA0910S0018	CCA0652S0011	CCA0708S0071	CCA0851S0216
CCA0836S0017	CCA0890S0065	CCA0762S0040	CCA0765S0005	CCA0749S0007	CCA0774S0006	CCA0884S0079	CCA0816S0125	CCA0912S0003	CCA0652S0019	CCA0708S0075	CCA0851S0222
CCA0836S0046	CCA0891S0034	CCA0762S0042	CCA0765S0006	CCA0749S0011	CCA0774S0007	CCA0884S0088	CCA0816S0126	CCA0912S0029	CCA0652S0055	CCA0708S0090	CCA0852S0042
CCA0836S0049	CCA0891S0047	CCA0762S0045	CCA0765S0008	CCA0754S0006	CCA0774S0049	CCA0884S0099	CCA0816S0150	CCA0914S0025	CCA0652S0109	CCA0708S0095	CCA0852S0052
CCA0836S0050	CCA0892S0016	CCA0762S0046	CCA0765S0026	CCA0754S0009	CCA0774S0064	CCA0884S0100	CCA0819S0029	CCA0918S0027	CCA0652S0110	CCA0708S0101	CCA0852S0078
CCA0836S0053	CCA0894S0003	CCA0762S0076	CCA0765S0051	CCA0754S0011	CCA0774S0084	CCA0884S0142	CCA0819S0042	CCA0918S0031	CCA0652S0113	CCA0708S0118	CCA0852S0085
CCA0836S0068	CCA0894S0021	CCA0763S0029	CCA0765S0058	CCA0754S0025	CCA0779S0031	CCA0884S0147	CCA0819S0064	CCA0918S0097	CCA0652S0115	CCA0709S0034	CCA0852S0087
CCA0836S0078	CCA0895S0001	CCA0763S0049	CCA0765S0076	CCA0754S0026	CCA0779S0036	CCA0884S0177	CCA0822S0015	CCA0918S0125	CCA0652S0118	CCA0709S0043	CCA0854S0008
CCA0836S0089	CCA0896S0001	CCA0763S0087	CCA0765S0084	CCA0754S0027	CCA0779S0038	CCA0884S0194	CCA0822S0020	CCA0918S0153	CCA0652S0120	CCA0709S0049	CCA0854S0109
CCA0836S0106	CCA0897S0050	CCA0765S0023	CCA0765S0094	CCA0754S0034	CCA0779S0127	CCA0886S0006	CCA0822S0021	CCA0918S0189	CCA0654S0001	CCA0709S0055	CCA0854S0112
CCA0836S0110	CCA0897S0051	CCA0765S0047	CCA0765S0112	CCA0754S0038	CCA0779S0136	CCA0886S0011	CCA0822S0042	CCA0918S0215	CCA0654S0009	CCA0709S0056	CCA0857S0016
CCA0838S0025	CCA0897S0058	CCA0765S0093	CCA0770S0040	CCA0754S0049	CCA0779S0148	CCA0886S0027	CCA0822S0044	CCA0919S0001	CCA0654S0040	CCA0709S0074	CCA0857S0020
CCA0838S0038	CCA0897S0062	CCA0765S0099	CCA0774S0013	CCA0754S0062	CCA0779S0161	CCA0886S0032	CCA0822S0064	CCA0919S0002	CCA0654S0050	CCA0709S0081	CCA0857S0041
CCA0838S0040	CCA0897S0066	CCA0765S0106	CCA0774S0023	CCA0754S0080	CCA0779S0181	CCA0886S0041	CCA0824S0014	CCA0919S0010	CCA0654S0054	CCA0709S0091	CCA0857S0084
CCA0838S0067	CCA0897S0068	CCA0765S0109	CCA0774S0072	CCA0754S0097	CCA0779S0190	CCA0886S0045	CCA0824S0018	CCA0922S0005	CCA0654S0089	CCA0711S0019	CCA0857S0090
CCA0838S0109	CCA0897S0076	CCA0766S0001	CCA0774S0094	CCA0754S0112	CCA0779S0196	CCA0887S0042	CCA0824S0030	CCA0922S0006	CCA0656S0008	CCA0711S0028	CCA0859S0004
CCA0839S0046	CCA0897S0089	CCA0770S0025	CCA0779S0011	CCA0754S0114	CCA0779S0205	CCA0887S0047	CCA0824S0031	CCA0922S0030	CCA0656S0018	CCA0716S0007	CCA0859S0010
CCA0839S0051	CCA0897S0100	CCA0770S0038	CCA0779S0016	CCA0754S0119	CCA0779S0224	CCA0887S0064	CCA0824S0113	CCA0922S0040	CCA0656S0024	CCA0716S0030	CCA0859S0034
CCA0839S0054	CCA0897S0101	CCA0774S0011	CCA0779S0018	CCA0754S0125	CCA0779S0234	CCA0887S0088	CCA0826S0023	CCA0923S0019	CCA0656S0034	CCA0716S0033	CCA0859S0063
CCA0839S0058	CCA0897S0134	CCA0774S0020	CCA0779S0045	CCA0754S0139	CCA0779S0241	CCA0887S0093	CCA0826S0030	CCA0923S0044	CCA0656S0036	CCA0716S0045	CCA0859S0131
CCA0839S0071	CCA0898S0001	CCA0774S0050	CCA0779S0088	CCA0754S0149	CCA0779S0253	CCA0887S0100	CCA0826S0050	CCA0923S0053	CCA0656S0037	CCA0716S0050	CCA0859S0152
CCA0839S0078	CCA0898S0047	CCA0774S0052	CCA0779S0090	CCA0754S0162	CCA0779S0266	CCA0888S0005	CCA0826S0057	CCA0923S0061	CCA0656S0038	CCA0716S0081	CCA0859S0177
CCA0839S0122	CCA0898S0089	CCA0774S0095	CCA0779S0097	CCA0754S0166	CCA0781S0013	CCA0888S0009	CCA0826S0081	CCA0925S0051	CCA0656S0044	CCA0716S0099	CCA0859S0187
CCA0839S0129	CCA0898S0098	CCA0774S0098	CCA0779S0110	CCA0754S0169	CCA0781S0039	CCA0890S0032	CCA0828S0008	CCA0925S0059	CCA0656S0062	CCA0716S0106	CCA0859S0197
CCA0839S0165	CCA0899S0010	CCA0779S0012	CCA0779S0129	CCA0754S0170	CCA0781S0070	CCA0890S0034	CCA0828S0031	CCA0925S0063	CCA0656S0086	CCA0718S0058	CCA0861S0035
CCA0842S0038	CCA0899S0019	CCA0779S0013	CCA0779S0204	CCA0754S0178	CCA0781S0077	CCA0890S0052	CCA0828S0054	CCA0925S0069	CCA0659S0003	CCA0718S0080	CCA0861S0037
CCA0843S0048	CCA0899S0062	CCA0779S0014	CCA0779S0219	CCA0757S0002	CCA0781S0084	CCA0890S0055	CCA0828S0065	CCA0925S0070	CCA0659S0020	CCA0718S0084	CCA0861S0043
CCA0843S0074	CCA0899S0082	CCA0779S0039	CCA0779S0239	CCA0757S0086	CCA0781S0085	CCA0890S0073	CCA0828S0076	CCA0929S0001	CCA0659S0021	CCA0718S0089	CCA0861S0056
CCA0843S0097	CCA0899S0095	CCA0779S0047	CCA0779S0240	CCA0757S0087	CCA0782S0007	CCA0890S0074	CCA0828S0087	CCA0929S0009	CCA0659S0026	CCA0718S0094	CCA0862S0006
CCA0844S0021	CCA0903S0002	CCA0779S0050	CCA0781S0035	CCA0757S0091	CCA0782S0028	CCA0891S0031	CCA0829S0004	CCA0929S0014	CCA0659S0034	CCA0718S0097	CCA0862S0014
CCA0844S0029	CCA0903S0013	CCA0779S0062	CCA0781S0043	CCA0757S0110	CCA0782S0058	CCA0891S0054	CCA0829S0015	CCA0929S0040	CCA0659S0053	CCA0718S0103	CCA0862S0027
CCA0844S0051	CCA0903S0033	CCA0779S0073	CCA0781S0045	CCA0762S0024	CCA0782S0059	CCA0892S0029	CCA0829S0027	CCA0929S0059	CCA0659S0060	CCA0718S0106	CCA0862S0086
CCA0844S0054	CCA0903S0066	CCA0779S0083	CCA0782S0002	CCA0762S0030	CCA0782S0060	CCA0892S0039	CCA0829S0047	CCA0929S0064	CCA0659S0061	CCA0718S0108	CCA0862S0118
CCA0845S0001	CCA0903S0088	CCA0779S0098	CCA0782S0009	CCA0762S0039	CCA0782S0071	CCA0892S0040	CCA0829S0058	CCA0929S0067	CCA0659S0071	CCA0718S0139	CCA0862S0133
CCA0848S0008	CCA0904S0012	CCA0779S0100	CCA0782S0082	CCA0763S0031	CCA0782S0099	CCA0894S0015	CCA0829S0069	CCA0929S0072	CCA0659S0080	CCA0718S0151	CCA0864S0027
CCA0848S0028	CCA0904S0040	CCA0779S0121	CCA0782S0085	CCA0763S0069	CCA0782S0148	CCA0894S0016	CCA0829S0073	CCA0929S0073	CCA0659S0087	CCA0718S0157	CCA0866S0021
CCA0848S0045	CCA0904S0047	CCA0779S0141	CCA0782S0087	CCA0763S0072	CCA0782S0160	CCA0894S0025	CCA0829S0078	CCA0929S0077	CCA0659S0098	CCA0718S0158	CCA0866S0024
CCA0848S0051	CCA0904S0070	CCA0779S0159	CCA0782S0101	CCA0763S0078	CCA0782S0165	CCA0897S0016	CCA0829S0090	CCA0929S0078	CCA0659S0100	CCA0721S0034	CCA0868S0001
CCA0848S0117	CCA0904S0072	CCA0779S0163	CCA0782S0112	CCA0765S0022	CCA0782S0169	CCA0897S0052	CCA0831S0012	CCA0932S0015	CCA0659S0112	CCA0721S0045	CCA0874S0017
CCA0849S0013	CCA0904S0094	CCA0779S0165	CCA0782S0113	CCA0765S0025	CCA0784S0019	CCA0897S0125	CCA0831S0015	CCA0932S0033	CCA0659S0119	CCA0724S0004	CCA0874S0066
CCA0849S0034	CCA0904S0095	CCA0779S0175	CCA0782S0161	CCA0765S0029	CCA0784S0021	CCA0897S0137	CCA0831S0038	CCA0932S0039	CCA0659S0121	CCA0724S0020	CCA0876S0042
CCA0849S0045	CCA0904S0104	CCA0779S0177	CCA0784S0013	CCA0765S0045	CCA0784S0030	CCA0897S0152	CCA0834S0018	CCA0932S0047	CCA0659S0138	CCA0724S0035	CCA0876S0049
CCA0849S0074	CCA0904S0112	CCA0779S0178	CCA0784S0017	CCA0765S0046	CCA0784S0035	CCA0898S0011	CCA0834S0021	CCA0932S0054	CCA0659S0173	CCA0724S0037	CCA0876S0050
CCA0849S0085	CCA0904S0141	CCA0779S0189	CCA0784S0022	CCA0765S0057	CCA0784S0038	CCA0898S0032	CCA0836S0006	CCA0932S0055	CCA0659S0183	CCA0724S0070	CCA0876S0051
CCA0851S0044	CCA0904S0142	CCA0779S0199	CCA0784S0023	CCA0765S0059	CCA0784S0039	CCA0898S0052	CCA0836S0023	CCA0932S0056	CCA0659S0193	CCA0729S0014	CCA0876S0062
CCA0851S0059	CCA0904S0173	CCA0779S0201	CCA0784S0033	CCA0765S0061	CCA0784S0051	CCA0898S0053	CCA0836S0038	CCA0935S0012	CCA0659S0197	CCA0729S0016	CCA0876S0064
CCA0851S0061	CCA0904S0198	CCA0779S0209	CCA0784S0034	CCA0765S0081	CCA0784S0053	CCA0898S0054	CCA0836S0045	CCA0935S0029	CCA0659S0198	CCA0729S0024	CCA0876S0071
CCA0851S0094	CCA0904S0204	CCA0779S0215	CCA0784S0055	CCA0765S0082	CCA0784S0054	CCA0898S0079	CCA0836S0056	CCA0935S0039	CCA0659S0242	CCA0729S0033	CCA0876S0073
CCA0851S0099	CCA0905S0008	CCA0779S0216	CCA0784S0069	CCA0765S0097	CCA0784S0059	CCA0898S0096	CCA0836S0100	CCA0935S0041	CCA0662S0019	CCA0733S0019	CCA0876S0075
CCA0851S0113	CCA0905S0017	CCA0779S0252	CCA0784S0076	CCA0765S0100	CCA0784S0071	CCA0898S0099	CCA0838S0022	CCA0935S0042	CCA0662S0022	CCA0733S0038	CCA0877S0017
CCA0851S0116	CCA0905S0057	CCA0779S0258	CCA0784S0083	CCA0765S0103	CCA0784S0118	CCA0898S0104	CCA0838S0026	CCA0935S0082	CCA0662S0034	CCA0733S0080	CCA0877S0024
CCA0851S0119	CCA0905S0061	CCA0779S0264	CCA0784S0084	CCA0770S0028	CCA0784S0130	CCA0898S0105	CCA0838S0047	CCA0935S0088	CCA0662S0049	CCA0733S0081	CCA0877S0035
CCA0851S0121	CCA0905S0117	CCA0781S0014	CCA0784S0092	CCA0770S0035	CCA0784S0152	CCA0899S0025	CCA0838S0050	CCA0936S0014	CCA0662S0063	CCA0733S0137	CCA0877S0043
CCA0851S0157	CCA0906S0022	CCA0781S0015	CCA0784S0093	CCA0774S0022	CCA0786S0013	CCA0899S0046	CCA0838S0061	CCA0936S0024	CCA0662S0078	CCA0733S0146	CCA0877S0051
CCA0851S0182	CCA0906S0054	CCA0781S0022	CCA0784S0103	CCA0774S0035	CCA0786S0044	CCA0899S0065	CCA0839S0009	CCA0936S0042	CCA0662S0086	CCA0733S0151	CCA0877S0058
CCA0851S0204	CCA0906S0098	CCA0781S0024	CCA0784S0112	CCA0774S0065	CCA0789S0003	CCA0899S0067	CCA0839S0020	CCA0936S0045	CCA0662S0100	CCA0734S0002	CCA0879S0068
CCA0851S0210	CCA0907S0005	CCA0781S0029	CCA0784S0119	CCA0779S0007	CCA0789S0014	CCA0903S0019	CCA0839S0041	CCA0936S0048	CCA0662S0101	CCA0736S0027	CCA0879S0076
CCA0851S0211	CCA0907S0013	CCA0781S0060	CCA0784S0163	CCA0779S0030	CCA0789S0054	CCA0903S0020	CCA0839S0076	CCA0936S0053	CCA0662S0112	CCA0736S0099	CCA0879S0087
CCA0852S0014	CCA0907S0026	CCA0781S0061	CCA0784S0182	CCA0779S0032	CCA0789S0064	CCA0903S0041	CCA0839S0100	CCA0936S0062	CCA0662S0113	CCA0737S0013	CCA0879S0093
CCA0852S0026	CCA0907S0057	CCA0781S0064	CCA0787S0001	CCA0779S0040	CCA0789S0068	CCA0903S0054	CCA0839S0108	CCA0936S0071	CCA0665S0021	CCA0737S0021	CCA0879S0098
CCA0852S0039	CCA0907S0078	CCA0781S0068	CCA0789S0008	CCA0779S0052	CCA0789S0076	CCA0903S0059	CCA0839S0111	CCA0940S0032	CCA0665S0052	CCA0737S0024	CCA0879S0100
CCA0852S0041	CCA0909S0029	CCA0782S0005	CCA0789S0013	CCA0779S0060	CCA0789S0100	CCA0903S0064	CCA0839S0138	CCA0940S0043	CCA0665S0055	CCA0737S0035	CCA0879S0103
CCA0852S0049	CCA0909S0030	CCA0782S0055	CCA0789S0018	CCA0779S0061	CCA0789S0117	CCA0903S0068	CCA0839S0167	CCA0940S0045	CCA0665S0072	CCA0737S0059	CCA0879S0107
CCA0852S0065	CCA0909S0056	CCA0782S0061	CCA0789S0021	CCA0779S0064	CCA0789S0135	CCA0903S0091	CCA0839S0170	CCA0941S0056	CCA0665S0079	CCA0737S0060	CCA0881S0040
CCA0852S0075	CCA0909S0088	CCA0782S0064	CCA0789S0037	CCA0779S0067	CCA0789S0150	CCA0904S0011	CCA0843S0080	CCA0941S0069	CCA0669S0007	CCA0737S0069	CCA0881S0044
CCA0853S0020	CCA0909S0092	CCA0782S0088	CCA0789S0060	CCA0779S0078	CCA0791S0026	CCA0904S0034	CCA0843S0089	CCA0941S0070	CCA0670S0013	CCA0737S0081	CCA0881S0108
CCA0854S0003	CCA0909S0107	CCA0782S0092	CCA0789S0072	CCA0779S0080	CCA0791S0069	CCA0904S0066	CCA0843S0092	CCA0941S0106	CCA0670S0014	CCA0737S0085	CCA0883S0005
CCA0854S0018	CCA0910S0025	CCA0782S0094	CCA0789S0084	CCA0779S0081	CCA0791S0078	CCA0904S0101	CCA0844S0019	CCA0942S0012	CCA0670S0044	CCA0737S0106	CCA0883S0032
CCA0854S0020	CCA0912S0028	CCA0782S0104	CCA0789S0110	CCA0779S0094	CCA0795S0018	CCA0904S0105	CCA0844S0024	CCA0942S0060	CCA0670S0056	CCA0737S0107	CCA0883S0034
CCA0854S0022	CCA0914S0009	CCA0782S0108	CCA0789S0113	CCA0779S0095	CCA0795S0019	CCA0904S0133	CCA0846S0020	CCA0942S0065	CCA0670S0079	CCA0743S0032	CCA0883S0046
CCA0854S0032	CCA0916S0017	CCA0782S0111	CCA0789S0119	CCA0779S0103	CCA0795S0047	CCA0904S0155	CCA0846S0036	CCA0944S0003	CCA0670S0080	CCA0743S0036	CCA0884S0012
CCA0854S0044	CCA0916S0027	CCA0782S0115	CCA0789S0124	CCA0779S0104	CCA0795S0049	CCA0904S0191	CCA0846S0038	CCA0944S0018	CCA0670S0085	CCA0743S0056	CCA0884S0076
CCA0854S0045	CCA0916S0028	CCA0782S0117	CCA0789S0125	CCA0779S0130	CCA0795S0078	CCA0904S0202	CCA0848S0006	CCA0944S0049	CCA0670S0090	CCA0747S0012	CCA0884S0081
CCA0854S0061	CCA0918S0072	CCA0782S0132	CCA0791S0001	CCA0779S0156	CCA0795S0096	CCA0904S0203	CCA0848S0007	CCA0944S0075	CCA0670S0096	CCA0747S0015	CCA0884S0089
CCA0854S0066	CCA0918S0084	CCA0782S0163	CCA0791S0002	CCA0779S0160	CCA0799S0013	CCA0905S0041	CCA0848S0013	CCA0947S0008	CCA0670S0101	CCA0747S0020	CCA0884S0126
CCA0854S0081	CCA0918S0087	CCA0782S0180	CCA0791S0008	CCA0779S0171	CCA0799S0027	CCA0905S0045	CCA0848S0018	CCA0949S0023	CCA0670S0103	CCA0747S0029	CCA0884S0141
CCA0854S0094	CCA0918S0095	CCA0784S0049	CCA0791S0030	CCA0779S0174	CCA0799S0055	CCA0905S0046	CCA0848S0037	CCA0949S0056	CCA0670S0104	CCA0747S0050	CCA0884S0182
CCA0857S0012	CCA0918S0174	CCA0784S0063	CCA0791S0042	CCA0779S0183	CCA0799S0061	CCA0905S0069	CCA0848S0046	CCA0951S0013	CCA0670S0116	CCA0747S0070	CCA0884S0205
CCA0857S0014	CCA0918S0177	CCA0784S0090	CCA0791S0059	CCA0779S0185	CCA0799S0070	CCA0905S0079	CCA0848S0049	CCA0951S0053	CCA0670S0118	CCA0748S0002	CCA0884S0218
CCA0857S0033	CCA0918S0182	CCA0784S0136	CCA0791S0066	CCA0779S0186	CCA0799S0080	CCA0905S0113	CCA0848S0071	CCA0951S0054	CCA0670S0119	CCA0748S0003	CCA0886S0004
CCA0857S0040	CCA0918S0190	CCA0784S0158	CCA0795S0076	CCA0779S0192	CCA0799S0081	CCA0906S0010	CCA0848S0078	CCA0951S0055	CCA0670S0125	CCA0748S0013	CCA0886S0012
CCA0857S0066	CCA0918S0213	CCA0786S0004	CCA0799S0052	CCA0779S0198	CCA0799S0118	CCA0906S0025	CCA0848S0090	CCA0953S0042	CCA0670S0132	CCA0748S0045	CCA0886S0016
CCA0857S0082	CCA0922S0046	CCA0786S0014	CCA0799S0078	CCA0779S0202	CCA0799S0119	CCA0906S0042	CCA0849S0007	CCA0953S0053	CCA0670S0139	CCA0748S0050	CCA0886S0039
CCA0857S0083	CCA0923S0008	CCA0786S0038	CCA0799S0097	CCA0779S0244	CCA0799S0122	CCA0906S0048	CCA0849S0011	CCA0953S0059	CCA0670S0141	CCA0748S0064	CCA0886S0053
CCA0857S0087	CCA0923S0066	CCA0786S0040	CCA0799S0109	CCA0779S0257	CCA0799S0123	CCA0906S0050	CCA0849S0017	CCA0953S0071	CCA0674S0005	CCA0748S0066	CCA0886S0059
CCA0857S0089	CCA0924S0026	CCA0786S0045	CCA0799S0111	CCA0781S0005	CCA0799S0131	CCA0906S0066	CCA0849S0021	CCA0954S0022	CCA0674S0009	CCA0748S0074	CCA0887S0017
CCA0859S0025	CCA0925S0014	CCA0789S0010	CCA0799S0128	CCA0781S0007	CCA0799S0147	CCA0906S0073	CCA0849S0023	CCA0961S0012	CCA0674S0010	CCA0748S0092	CCA0887S0029
CCA0859S0060	CCA0929S0010	CCA0789S0016	CCA0799S0140	CCA0781S0019	CCA0799S0163	CCA0907S0009	CCA0849S0036	CCA0961S0016	CCA0674S0012	CCA0748S0101	CCA0887S0059
CCA0859S0078	CCA0929S0016	CCA0789S0026	CCA0800S0006	CCA0781S0036	CCA0799S0182	CCA0907S0037	CCA0849S0037	CCA0961S0029	CCA0674S0015	CCA0748S0113	CCA0887S0089
CCA0859S0086	CCA0929S0024	CCA0789S0032	CCA0800S0015	CCA0781S0074	CCA0800S0007	CCA0907S0038	CCA0849S0079	CCA0961S0053	CCA0674S0022	CCA0748S0115	CCA0887S0092
CCA0859S0092	CCA0929S0031	CCA0789S0033	CCA0800S0021	CCA0781S0086	CCA0800S0043	CCA0907S0073	CCA0851S0029	CCA0961S0061	CCA0674S0028	CCA0749S0039	CCA0887S0108
CCA0859S0100	CCA0929S0116	CCA0789S0036	CCA0800S0030	CCA0781S0087	CCA0800S0066	CCA0907S0087	CCA0851S0039	CCA0961S0065	CCA0674S0068	CCA0754S0012	CCA0887S0114
CCA0859S0109	CCA0932S0042	CCA0789S0042	CCA0800S0070	CCA0782S0004	CCA0800S0093	CCA0907S0091	CCA0851S0070	CCA0961S0076	CCA0674S0071	CCA0754S0013	CCA0887S0122
CCA0859S0147	CCA0935S0009	CCA0789S0046	CCA0800S0117	CCA0782S0013	CCA0800S0113	CCA0907S0092	CCA0851S0078	CCA0961S0077	CCA0674S0084	CCA0754S0032	CCA0887S0124
CCA0859S0154	CCA0935S0046	CCA0789S0051	CCA0800S0118	CCA0782S0035	CCA0803S0020	CCA0907S0099	CCA0851S0079	CCA0961S0122	CCA0674S0091	CCA0754S0092	CCA0888S0020
CCA0859S0168	CCA0935S0081	CCA0789S0052	CCA0800S0137	CCA0782S0038	CCA0803S0040	CCA0909S0004	CCA0851S0129	CCA0964S0058	CCA0674S0123	CCA0754S0095	CCA0888S0044
CCA0859S0172	CCA0935S0087	CCA0789S0057	CCA0803S0003	CCA0782S0078	CCA0803S0051	CCA0909S0053	CCA0851S0136	CCA0964S0074	CCA0674S0129	CCA0754S0099	CCA0890S0004
CCA0861S0014	CCA0936S0046	CCA0789S0069	CCA0803S0007	CCA0782S0089	CCA0803S0059	CCA0909S0058	CCA0851S0137	CCA0964S0075	CCA0674S0161	CCA0754S0150	CCA0890S0023
CCA0861S0033	CCA0936S0068	CCA0789S0070	CCA0803S0011	CCA0782S0093	CCA0803S0076	CCA0909S0078	CCA0851S0141	CCA0965S0002	CCA0674S0174	CCA0754S0164	CCA0890S0041
CCA0862S0011	CCA0940S0002	CCA0789S0095	CCA0803S0012	CCA0782S0097	CCA0803S0095	CCA0910S0017	CCA0851S0154	CCA0965S0006	CCA0674S0193	CCA0754S0165	CCA0891S0046
CCA0862S0020	CCA0940S0035	CCA0789S0101	CCA0803S0045	CCA0782S0116	CCA0803S0098	CCA0912S0036	CCA0851S0192	CCA0973S0041	CCA0674S0215	CCA0754S0173	CCA0891S0049
CCA0862S0021	CCA0940S0038	CCA0789S0102	CCA0803S0084	CCA0782S0119	CCA0803S0119	CCA0912S0075	CCA0851S0212	CCA0975S0004	CCA0674S0220	CCA0754S0175	CCA0894S0028
CCA0862S0025	CCA0940S0051	CCA0789S0116	CCA0803S0090	CCA0782S0120	CCA0803S0132	CCA0912S0093	CCA0851S0217	CCA0975S0008	CCA0674S0221	CCA0754S0177	CCA0894S0032
CCA0862S0026	CCA0940S0060	CCA0789S0129	CCA0803S0092	CCA0782S0138	CCA0806S0001	CCA0912S0100	CCA0852S0038	CCA0975S0014	CCA0676S0016	CCA0754S0181	CCA0897S0013
CCA0862S0034	CCA0940S0062	CCA0789S0130	CCA0803S0131	CCA0782S0151	CCA0806S0015	CCA0916S0014	CCA0852S0053	CCA0975S0023	CCA0676S0021	CCA0757S0006	CCA0897S0024
CCA0862S0053	CCA0941S0016	CCA0789S0149	CCA0806S0027	CCA0782S0175	CCA0806S0018	CCA0918S0019	CCA0852S0057	CCA0975S0079	CCA0676S0023	CCA0757S0073	CCA0897S0093
CCA0862S0057	CCA0941S0090	CCA0791S0010	CCA0806S0029	CCA0784S0009	CCA0806S0028	CCA0918S0036	CCA0852S0061	CCA0975S0113	CCA0676S0026	CCA0757S0075	CCA0897S0110
CCA0862S0064	CCA0941S0097	CCA0791S0013	CCA0806S0043	CCA0784S0024	CCA0806S0088	CCA0918S0058	CCA0852S0093	CCA0977S0008	CCA0676S0041	CCA0757S0077	CCA0897S0135
CCA0862S0071	CCA0941S0104	CCA0791S0021	CCA0806S0049	CCA0784S0029	CCA0806S0138	CCA0918S0078	CCA0852S0097	CCA0977S0023	CCA0676S0045	CCA0757S0085	CCA0897S0145
CCA0862S0072	CCA0942S0106	CCA0791S0061	CCA0806S0053	CCA0784S0042	CCA0806S0143	CCA0918S0081	CCA0853S0003	CCA0977S0048	CCA0676S0049	CCA0757S0094	CCA0897S0148
CCA0862S0087	CCA0944S0006	CCA0791S0063	CCA0806S0056	CCA0784S0043	CCA0806S0148	CCA0918S0133	CCA0853S0030	CCA0981S0022	CCA0676S0071	CCA0757S0102	CCA0897S0165
CCA0862S0122	CCA0944S0007	CCA0791S0065	CCA0806S0076	CCA0784S0072	CCA0809S0001	CCA0918S0152	CCA0854S0036	CCA0981S0026	CCA0676S0073	CCA0757S0103	CCA0897S0173
CCA0864S0016	CCA0944S0011	CCA0791S0077	CCA0806S0091	CCA0784S0074	CCA0810S0002	CCA0918S0203	CCA0854S0038	CCA0982S0025	CCA0676S0077	CCA0757S0104	CCA0898S0005
CCA0866S0031	CCA0944S0052	CCA0791S0088	CCA0806S0092	CCA0784S0082	CCA0810S0005	CCA0921S0001	CCA0854S0039	CCA0982S0027	CCA0676S0082	CCA0762S0003	CCA0898S0010
CCA0867S0001	CCA0944S0078	CCA0791S0094	CCA0806S0095	CCA0784S0095	CCA0810S0019	CCA0922S0009	CCA0854S0046	CCA0982S0034	CCA0676S0089	CCA0762S0016	CCA0898S0019
CCA0869S0013	CCA0947S0042	CCA0795S0012	CCA0806S0105	CCA0784S0105	CCA0810S0075	CCA0922S0038	CCA0854S0063	CCA0983S0010	CCA0676S0100	CCA0762S0077	CCA0898S0038
CCA0869S0067	CCA0949S0038	CCA0795S0063	CCA0806S0112	CCA0784S0121	CCA0810S0080	CCA0923S0018	CCA0854S0068	CCA0983S0026	CCA0676S0109	CCA0763S0010	CCA0898S0092
CCA0870S0004	CCA0949S0041	CCA0795S0073	CCA0806S0119	CCA0784S0127	CCA0810S0083	CCA0923S0041	CCA0854S0072	CCA0984S0025	CCA0676S0117	CCA0763S0019	CCA0898S0093
CCA0870S0033	CCA0951S0011	CCA0795S0075	CCA0810S0028	CCA0784S0132	CCA0810S0109	CCA0923S0068	CCA0854S0074	CCA0984S0050	CCA0676S0119	CCA0763S0030	CCA0898S0110
CCA0870S0056	CCA0951S0014	CCA0799S0012	CCA0810S0065	CCA0784S0137	CCA0810S0113	CCA0923S0071	CCA0854S0075	CCA0984S0051	CCA0678S0013	CCA0763S0052	CCA0898S0115
CCA0874S0010	CCA0953S0002	CCA0799S0036	CCA0810S0082	CCA0784S0138	CCA0810S0118	CCA0924S0028	CCA0854S0087	CCA0986S0031	CCA0678S0016	CCA0765S0028	CCA0899S0005
CCA0874S0015	CCA0953S0058	CCA0799S0045	CCA0810S0105	CCA0786S0008	CCA0810S0121	CCA0924S0029	CCA0854S0088	CCA0986S0034	CCA0678S0030	CCA0765S0062	CCA0899S0026
CCA0874S0030	CCA0953S0061	CCA0799S0087	CCA0813S0065	CCA0786S0030	CCA0813S0077	CCA0924S0045	CCA0854S0089	CCA0986S0069	CCA0678S0031	CCA0765S0066	CCA0899S0054
CCA0874S0053	CCA0954S0004	CCA0799S0102	CCA0813S0067	CCA0786S0050	CCA0813S0102	CCA0925S0005	CCA0857S0007	CCA0989S0026	CCA0678S0045	CCA0765S0085	CCA0899S0081
CCA0876S0013	CCA0954S0007	CCA0799S0106	CCA0816S0007	CCA0789S0053	CCA0813S0106	CCA0925S0009	CCA0857S0049	CCA0989S0041	CCA0678S0050	CCA0765S0117	CCA0899S0085
CCA0876S0032	CCA0954S0009	CCA0799S0110	CCA0816S0019	CCA0789S0059	CCA0816S0037	CCA0925S0017	CCA0857S0077	CCA0989S0046	CCA0678S0052	CCA0765S0119	CCA0899S0094
CCA0876S0041	CCA0957S0035	CCA0799S0126	CCA0816S0031	CCA0789S0066	CCA0816S0073	CCA0925S0027	CCA0857S0088	CCA0991S0014	CCA0678S0069	CCA0770S0014	CCA0899S0098
CCA0876S0043	CCA0961S0015	CCA0799S0165	CCA0816S0047	CCA0789S0071	CCA0816S0089	CCA0925S0041	CCA0859S0009	CCA0991S0025	CCA0678S0078	CCA0770S0020	CCA0901S0010
CCA0876S0057	CCA0961S0022	CCA0799S0173	CCA0816S0059	CCA0789S0094	CCA0816S0097	CCA0925S0056	CCA0859S0014	CCA0991S0065	CCA0678S0086	CCA0770S0023	CCA0903S0006
CCA0877S0011	CCA0961S0030	CCA0799S0175	CCA0816S0072	CCA0789S0103	CCA0816S0102	CCA0925S0095	CCA0859S0015	CCA0991S0082	CCA0678S0113	CCA0772S0001	CCA0903S0047
CCA0877S0012	CCA0961S0051	CCA0799S0183	CCA0816S0114	CCA0789S0114	CCA0816S0118	CCA0925S0096	CCA0859S0047	CCA0991S0084	CCA0678S0114	CCA0774S0010	CCA0903S0048
CCA0877S0020	CCA0961S0054	CCA0800S0039	CCA0816S0115	CCA0789S0133	CCA0816S0124	CCA0925S0105	CCA0859S0055	CCA0993S0011	CCA0678S0124	CCA0774S0025	CCA0904S0018
CCA0877S0040	CCA0961S0058	CCA0800S0098	CCA0816S0119	CCA0789S0143	CCA0816S0145	CCA0927S0001	CCA0859S0056	CCA0998S0005	CCA0678S0134	CCA0774S0029	CCA0904S0021
CCA0879S0014	CCA0961S0063	CCA0800S0103	CCA0816S0120	CCA0789S0146	CCA0816S0159	CCA0929S0006	CCA0859S0057	CCA0998S0010	CCA0678S0184	CCA0774S0034	CCA0904S0025
CCA0879S0051	CCA0961S0121	CCA0800S0120	CCA0816S0137	CCA0791S0009	CCA0819S0014	CCA0929S0038	CCA0859S0076	CCA0998S0012	CCA0678S0193	CCA0774S0037	CCA0904S0027
CCA0879S0060	CCA0961S0126	CCA0800S0123	CCA0816S0139	CCA0791S0015	CCA0819S0016	CCA0929S0045	CCA0859S0095	CCA0998S0023	CCA0678S0194	CCA0774S0042	CCA0904S0057
CCA0879S0072	CCA0964S0001	CCA0800S0133	CCA0816S0153	CCA0791S0019	CCA0819S0017	CCA0929S0079	CCA0859S0124	CCA0998S0036	CCA0678S0207	CCA0774S0043	CCA0904S0067
CCA0881S0009	CCA0964S0049	CCA0803S0013	CCA0819S0012	CCA0791S0071	CCA0819S0030	CCA0929S0089	CCA0859S0125	CCA1002S0026	CCA0679S0024	CCA0774S0067	CCA0904S0085
CCA0881S0037	CCA0964S0066	CCA0803S0043	CCA0819S0015	CCA0795S0003	CCA0819S0067	CCA0929S0090	CCA0859S0160	CCA1002S0066	CCA0679S0032	CCA0774S0091	CCA0904S0151
CCA0881S0048	CCA0968S0014	CCA0803S0053	CCA0819S0025	CCA0795S0016	CCA0819S0076	CCA0929S0101	CCA0859S0162	CCA1002S0067	CCA0679S0044	CCA0779S0008	CCA0904S0176
CCA0881S0050	CCA0968S0031	CCA0803S0071	CCA0819S0034	CCA0795S0020	CCA0822S0011	CCA0932S0040	CCA0859S0183	CCA1002S0091	CCA0679S0112	CCA0779S0020	CCA0904S0179
CCA0881S0052	CCA0968S0033	CCA0803S0100	CCA0819S0041	CCA0795S0021	CCA0822S0035	CCA0932S0052	CCA0859S0193	CCA1005S0034	CCA0679S0113	CCA0779S0029	CCA0904S0180
CCA0881S0055	CCA0973S0006	CCA0803S0109	CCA0819S0048	CCA0795S0052	CCA0822S0040	CCA0935S0043	CCA0859S0198	CCA1008S0019	CCA0679S0130	CCA0779S0055	CCA0905S0013
CCA0881S0067	CCA0973S0063	CCA0803S0117	CCA0819S0051	CCA0795S0054	CCA0822S0041	CCA0935S0044	CCA0861S0020	CCA1013S0015	CCA0679S0131	CCA0779S0065	CCA0905S0052
CCA0881S0071	CCA0973S0065	CCA0806S0031	CCA0819S0055	CCA0795S0065	CCA0822S0046	CCA0935S0066	CCA0861S0039	CCA1013S0028	CCA0679S0146	CCA0779S0105	CCA0905S0118
CCA0881S0084	CCA0975S0009	CCA0806S0070	CCA0822S0023	CCA0795S0070	CCA0822S0053	CCA0935S0076	CCA0862S0041	CCA1013S0044	CCA0680S0010	CCA0779S0109	CCA0906S0043
CCA0881S0098	CCA0975S0010	CCA0806S0081	CCA0822S0025	CCA0795S0074	CCA0824S0008	CCA0935S0083	CCA0862S0050	CCA1013S0053	CCA0680S0014	CCA0779S0113	CCA0906S0097
CCA0881S0106	CCA0975S0012	CCA0806S0098	CCA0822S0028	CCA0798S0001	CCA0824S0010	CCA0935S0089	CCA0862S0059	CCA1013S0068	CCA0680S0023	CCA0779S0143	CCA0907S0011
CCA0883S0031	CCA0975S0055	CCA0806S0099	CCA0822S0030	CCA0799S0005	CCA0824S0017	CCA0936S0022	CCA0862S0065	CCA1013S0080	CCA0680S0059	CCA0779S0149	CCA0907S0019
CCA0883S0038	CCA0975S0081	CCA0806S0114	CCA0822S0045	CCA0799S0015	CCA0824S0022	CCA0936S0034	CCA0862S0081	CCA1015S0013	CCA0680S0068	CCA0779S0164	CCA0907S0022
CCA0883S0057	CCA0975S0089	CCA0806S0129	CCA0824S0003	CCA0799S0023	CCA0824S0047	CCA0936S0047	CCA0862S0114	CCA1015S0044	CCA0680S0075	CCA0779S0184	CCA0907S0060
CCA0884S0026	CCA0975S0101	CCA0810S0006	CCA0824S0016	CCA0799S0040	CCA0824S0087	CCA0936S0066	CCA0862S0121	CCA1015S0058	CCA0680S0095	CCA0779S0195	CCA0907S0068
CCA0884S0039	CCA0975S0103	CCA0810S0021	CCA0824S0024	CCA0799S0056	CCA0824S0090	CCA0940S0005	CCA0862S0136	CCA1015S0070	CCA0680S0109	CCA0779S0200	CCA0909S0002
CCA0884S0057	CCA0975S0107	CCA0810S0079	CCA0824S0034	CCA0799S0074	CCA0824S0110	CCA0940S0008	CCA0864S0005	CCA1015S0080	CCA0680S0118	CCA0779S0203	CCA0909S0040
CCA0884S0062	CCA0976S0001	CCA0813S0001	CCA0824S0045	CCA0799S0084	CCA0826S0028	CCA0940S0018	CCA0864S0007	CCA1015S0102	CCA0680S0127	CCA0779S0208	CCA0909S0041
CCA0884S0066	CCA0977S0043	CCA0813S0003	CCA0824S0091	CCA0799S0088	CCA0826S0064	CCA0940S0033	CCA0866S0014	CCA1015S0107	CCA0680S0132	CCA0779S0225	CCA0910S0026
CCA0884S0090	CCA0979S0029	CCA0813S0012	CCA0824S0098	CCA0799S0093	CCA0826S0067	CCA0940S0034	CCA0866S0023	CCA1015S0110	CCA0680S0133	CCA0779S0227	CCA0912S0001
CCA0884S0139	CCA0979S0031	CCA0813S0052	CCA0824S0114	CCA0799S0127	CCA0826S0073	CCA0940S0049	CCA0869S0009	CCA1016S0006	CCA0680S0138	CCA0779S0228	CCA0912S0019
CCA0884S0148	CCA0981S0027	CCA0813S0061	CCA0826S0027	CCA0799S0159	CCA0826S0077	CCA0940S0056	CCA0869S0084	CCA1016S0009	CCA0680S0154	CCA0779S0229	CCA0912S0020
CCA0884S0181	CCA0981S0049	CCA0813S0066	CCA0826S0045	CCA0799S0164	CCA0828S0028	CCA0941S0011	CCA0870S0014	CCA1016S0029	CCA0681S0032	CCA0779S0231	CCA0912S0059
CCA0884S0203	CCA0981S0053	CCA0813S0105	CCA0826S0047	CCA0799S0168	CCA0828S0049	CCA0941S0017	CCA0870S0046	CCA1016S0047	CCA0681S0071	CCA0779S0243	CCA0912S0074
CCA0884S0207	CCA0982S0014	CCA0816S0008	CCA0828S0012	CCA0799S0172	CCA0828S0050	CCA0941S0031	CCA0872S0001	CCA1022S0012	CCA0681S0077	CCA0779S0254	CCA0914S0004
CCA0886S0007	CCA0982S0024	CCA0816S0010	CCA0828S0019	CCA0800S0010	CCA0828S0084	CCA0941S0045	CCA0874S0026	CCA1024S0013	CCA0681S0081	CCA0779S0259	CCA0914S0010
CCA0886S0020	CCA0982S0033	CCA0816S0011	CCA0828S0051	CCA0800S0012	CCA0828S0089	CCA0941S0051	CCA0874S0055	CCA1027S0022	CCA0681S0082	CCA0781S0027	CCA0914S0017
CCA0886S0021	CCA0982S0050	CCA0816S0043	CCA0828S0052	CCA0800S0022	CCA0829S0039	CCA0941S0054	CCA0874S0060	CCA1027S0024	CCA0681S0084	CCA0781S0038	CCA0914S0019
CCA0886S0043	CCA0982S0067	CCA0816S0050	CCA0828S0053	CCA0800S0031	CCA0829S0042	CCA0941S0060	CCA0874S0069	CCA1027S0025	CCA0681S0095	CCA0781S0079	CCA0914S0020
CCA0886S0049	CCA0983S0033	CCA0816S0051	CCA0828S0077	CCA0800S0044	CCA0829S0049	CCA0941S0100	CCA0876S0036	CCA1027S0042	CCA0681S0100	CCA0782S0018	CCA0914S0022
CCA0886S0061	CCA0983S0039	CCA0816S0070	CCA0828S0078	CCA0800S0047	CCA0829S0057	CCA0942S0029	CCA0876S0054	CCA1029S0015	CCA0681S0105	CCA0782S0037	CCA0916S0019
CCA0886S0066	CCA0983S0050	CCA0816S0071	CCA0829S0016	CCA0800S0061	CCA0829S0084	CCA0942S0058	CCA0876S0079	CCA1029S0037	CCA0681S0106	CCA0782S0039	CCA0918S0011
CCA0887S0016	CCA0983S0059	CCA0816S0078	CCA0829S0019	CCA0800S0064	CCA0829S0086	CCA0942S0083	CCA0877S0031	CCA1031S0016	CCA0686S0003	CCA0782S0054	CCA0918S0013
CCA0887S0023	CCA0983S0067	CCA0816S0093	CCA0829S0028	CCA0800S0139	CCA0829S0093	CCA0944S0012	CCA0877S0036	CCA1031S0020	CCA0686S0007	CCA0782S0057	CCA0918S0041
CCA0887S0053	CCA0984S0040	CCA0816S0098	CCA0829S0044	CCA0800S0145	CCA0829S0095	CCA0944S0017	CCA0877S0037	CCA1033S0010	CCA0686S0049	CCA0782S0063	CCA0918S0043
CCA0887S0074	CCA0984S0044	CCA0816S0099	CCA0829S0064	CCA0803S0024	CCA0829S0098	CCA0944S0071	CCA0879S0013	CCA1033S0013	CCA0686S0056	CCA0782S0069	CCA0918S0074
CCA0887S0109	CCA0984S0053	CCA0816S0110	CCA0829S0070	CCA0803S0054	CCA0831S0009	CCA0944S0076	CCA0879S0028	CCA1033S0052	CCA0686S0076	CCA0782S0076	CCA0918S0090
CCA0888S0008	CCA0984S0054	CCA0816S0135	CCA0829S0087	CCA0803S0063	CCA0831S0013	CCA0947S0010	CCA0879S0043	CCA1034S0021	CCA0688S0019	CCA0782S0136	CCA0918S0094
CCA0888S0029	CCA0986S0029	CCA0816S0138	CCA0829S0094	CCA0803S0070	CCA0831S0024	CCA0949S0039	CCA0879S0075	CCA1039S0048	CCA0688S0021	CCA0782S0142	CCA0918S0109
CCA0890S0007	CCA0986S0048	CCA0816S0140	CCA0831S0010	CCA0803S0072	CCA0831S0036	CCA0949S0061	CCA0879S0086	CCA1041S0015	CCA0688S0024	CCA0782S0144	CCA0918S0110
CCA0890S0012	CCA0986S0055	CCA0816S0142	CCA0831S0054	CCA0803S0089	CCA0831S0068	CCA0951S0012	CCA0879S0094	CCA1041S0041	CCA0688S0028	CCA0782S0147	CCA0918S0122
CCA0890S0039	CCA0986S0063	CCA0819S0013	CCA0831S0073	CCA0806S0019	CCA0832S0001	CCA0953S0011	CCA0881S0024	CCA1045S0023	CCA0688S0034	CCA0782S0153	CCA0918S0123
CCA0890S0045	CCA0986S0089	CCA0819S0023	CCA0834S0007	CCA0806S0033	CCA0834S0034	CCA0953S0048	CCA0881S0045	CCA1045S0037	CCA0688S0038	CCA0782S0166	CCA0918S0157
CCA0890S0049	CCA0988S0001	CCA0819S0045	CCA0834S0015	CCA0806S0037	CCA0834S0054	CCA0953S0084	CCA0881S0049	CCA1045S0051	CCA0688S0042	CCA0782S0177	CCA0918S0170
CCA0890S0066	CCA0989S0023	CCA0819S0063	CCA0834S0017	CCA0806S0067	CCA0836S0021	CCA0954S0024	CCA0881S0091	CCA1046S0019	CCA0688S0059	CCA0784S0031	CCA0918S0176
CCA0891S0009	CCA0989S0034	CCA0819S0065	CCA0836S0005	CCA0806S0068	CCA0836S0027	CCA0954S0037	CCA0881S0105	CCA1046S0035	CCA0688S0071	CCA0784S0036	CCA0919S0007
CCA0891S0011	CCA0990S0054	CCA0819S0066	CCA0836S0039	CCA0806S0073	CCA0836S0036	CCA0957S0030	CCA0883S0004	CCA1046S0045	CCA0688S0074	CCA0784S0075	CCA0919S0008
CCA0891S0018	CCA0990S0074	CCA0822S0012	CCA0836S0074	CCA0806S0086	CCA0836S0058	CCA0957S0032	CCA0883S0035	CCA1046S0070	CCA0688S0097	CCA0784S0107	CCA0922S0008
CCA0891S0030	CCA0991S0021	CCA0822S0014	CCA0836S0081	CCA0806S0087	CCA0836S0059	CCA0961S0014	CCA0883S0059	CCA1046S0080	CCA0690S0001	CCA0784S0122	CCA0922S0014
CCA0891S0051	CCA0991S0057	CCA0822S0043	CCA0836S0084	CCA0806S0097	CCA0836S0063	CCA0961S0028	CCA0884S0016	CCA1046S0085	CCA0691S0006	CCA0784S0126	CCA0922S0042
CCA0892S0015	CCA0991S0086	CCA0822S0055	CCA0836S0085	CCA0806S0130	CCA0836S0071	CCA0961S0069	CCA0884S0018	CCA1046S0111	CCA0691S0008	CCA0784S0135	CCA0923S0005
CCA0894S0005	CCA0993S0010	CCA0822S0083	CCA0836S0088	CCA0810S0026	CCA0836S0090	CCA0961S0072	CCA0884S0020	CCA1048S0050	CCA0691S0018	CCA0784S0139	CCA0923S0007
CCA0894S0019	CCA0995S0003	CCA0824S0036	CCA0838S0016	CCA0810S0027	CCA0836S0095	CCA0961S0086	CCA0884S0024	CCA1049S0001	CCA0691S0019	CCA0784S0146	CCA0923S0048
CCA0897S0033	CCA0998S0007	CCA0824S0109	CCA0838S0021	CCA0810S0029	CCA0836S0105	CCA0961S0088	CCA0884S0031	CCA1051S0008	CCA0691S0049	CCA0784S0153	CCA0923S0051
CCA0897S0053	CCA0998S0011	CCA0824S0112	CCA0838S0031	CCA0810S0036	CCA0838S0024	CCA0961S0106	CCA0884S0059	CCA1051S0020	CCA0691S0074	CCA0784S0167	CCA0923S0052
CCA0897S0059	CCA1002S0004	CCA0826S0018	CCA0838S0032	CCA0810S0077	CCA0838S0029	CCA0964S0040	CCA0884S0094	CCA1051S0058	CCA0691S0080	CCA0786S0021	CCA0923S0054
CCA0897S0071	CCA1002S0041	CCA0826S0026	CCA0838S0036	CCA0810S0111	CCA0838S0081	CCA0964S0041	CCA0884S0101	CCA1051S0063	CCA0691S0108	CCA0786S0047	CCA0924S0001
CCA0897S0072	CCA1002S0070	CCA0828S0030	CCA0838S0037	CCA0813S0002	CCA0838S0093	CCA0964S0045	CCA0884S0134	CCA1051S0064	CCA0691S0117	CCA0789S0025	CCA0924S0013
CCA0897S0088	CCA1002S0084	CCA0828S0043	CCA0838S0055	CCA0813S0026	CCA0839S0014	CCA0964S0056	CCA0884S0155	CCA1052S0023	CCA0691S0137	CCA0789S0028	CCA0924S0042
CCA0897S0095	CCA1002S0093	CCA0828S0044	CCA0838S0062	CCA0813S0050	CCA0839S0036	CCA0973S0002	CCA0884S0175	CCA1052S0025	CCA0694S0023	CCA0789S0040	CCA0925S0026
CCA0897S0121	CCA1013S0035	CCA0828S0068	CCA0838S0064	CCA0813S0058	CCA0839S0037	CCA0973S0026	CCA0884S0178	CCA1055S0039	CCA0694S0030	CCA0789S0045	CCA0925S0044
CCA0897S0182	CCA1013S0036	CCA0828S0075	CCA0838S0083	CCA0813S0076	CCA0839S0045	CCA0973S0027	CCA0884S0204	CCA1055S0069	CCA0694S0033	CCA0789S0047	CCA0925S0064
CCA0898S0036	CCA1013S0066	CCA0828S0079	CCA0838S0089	CCA0813S0091	CCA0839S0050	CCA0975S0002	CCA0884S0211	CCA1057S0032	CCA0694S0034	CCA0789S0112	CCA0925S0074
CCA0898S0057	CCA1013S0067	CCA0828S0086	CCA0838S0103	CCA0813S0099	CCA0839S0061	CCA0975S0003	CCA0884S0213	CCA1057S0064	CCA0694S0041	CCA0789S0132	CCA0925S0114
CCA0898S0073	CCA1013S0083	CCA0829S0038	CCA0838S0110	CCA0813S0108	CCA0839S0090	CCA0975S0007	CCA0886S0023	CCA1060S0053	CCA0696S0008	CCA0789S0148	CCA0925S0116
CCA0898S0112	CCA1014S0001	CCA0829S0043	CCA0839S0010	CCA0815S0001	CCA0839S0116	CCA0975S0047	CCA0886S0054	CCA1061S0004	CCA0696S0011	CCA0789S0152	CCA0929S0068
CCA0898S0117	CCA1015S0027	CCA0829S0055	CCA0839S0130	CCA0816S0002	CCA0839S0124	CCA0975S0048	CCA0887S0004	CCA1061S0009	CCA0696S0012	CCA0791S0004	CCA0929S0069
CCA0898S0127	CCA1015S0049	CCA0829S0062	CCA0839S0132	CCA0816S0018	CCA0839S0148	CCA0975S0070	CCA0887S0026	CCA1063S0012	CCA0696S0038	CCA0791S0014	CCA0929S0070
CCA0899S0008	CCA1015S0056	CCA0829S0067	CCA0839S0139	CCA0816S0025	CCA0839S0155	CCA0975S0086	CCA0887S0030	CCA1065S0001	CCA0696S0086	CCA0791S0018	CCA0929S0085
CCA0899S0013	CCA1015S0119	CCA0829S0088	CCA0842S0033	CCA0816S0076	CCA0839S0168	CCA0975S0094	CCA0887S0035	CCA1066S0020	CCA0696S0101	CCA0791S0025	CCA0929S0091
CCA0899S0037	CCA1015S0126	CCA0831S0018	CCA0843S0016	CCA0816S0077	CCA0842S0005	CCA0977S0006	CCA0887S0058	CCA1066S0030	CCA0696S0108	CCA0791S0037	CCA0932S0013
CCA0899S0091	CCA1016S0002	CCA0831S0055	CCA0843S0075	CCA0816S0116	CCA0842S0041	CCA0977S0038	CCA0887S0094	CCA1068S0001	CCA0698S0004	CCA0791S0040	CCA0932S0024
CCA0899S0093	CCA1016S0003	CCA0834S0003	CCA0843S0096	CCA0816S0122	CCA0843S0006	CCA0977S0064	CCA0890S0001	CCA1068S0025	CCA0698S0014	CCA0791S0043	CCA0932S0038
CCA0901S0011	CCA1016S0015	CCA0834S0014	CCA0844S0014	CCA0819S0022	CCA0843S0029	CCA0979S0008	CCA0890S0040	CCA1071S0004	CCA0698S0052	CCA0791S0049	CCA0932S0048
CCA0901S0013	CCA1016S0044	CCA0834S0051	CCA0844S0035	CCA0819S0046	CCA0843S0083	CCA0981S0013	CCA0890S0050	CCA1074S0002	CCA0698S0059	CCA0791S0055	CCA0935S0014
CCA0903S0058	CCA1017S0004	CCA0834S0053	CCA0846S0011	CCA0819S0052	CCA0844S0013	CCA0981S0031	CCA0891S0019	CCA1075S0046	CCA0698S0079	CCA0791S0062	CCA0935S0040
CCA0904S0019	CCA1017S0007	CCA0836S0008	CCA0846S0053	CCA0822S0003	CCA0844S0032	CCA0981S0039	CCA0891S0033	CCA1078S0013	CCA0698S0089	CCA0791S0072	CCA0936S0057
CCA0904S0028	CCA1017S0028	CCA0836S0010	CCA0848S0027	CCA0822S0010	CCA0844S0033	CCA0981S0050	CCA0891S0052	CCA1079S0012	CCA0698S0104	CCA0791S0073	CCA0936S0059
CCA0904S0032	CCA1025S0006	CCA0836S0028	CCA0848S0038	CCA0822S0017	CCA0844S0041	CCA0981S0058	CCA0892S0033	CCA1079S0019	CCA0698S0136	CCA0791S0075	CCA0936S0061
CCA0904S0043	CCA1025S0010	CCA0836S0030	CCA0848S0084	CCA0822S0018	CCA0844S0046	CCA0982S0031	CCA0892S0036	CCA1082S0006	CCA0698S0154	CCA0791S0087	CCA0936S0076
CCA0904S0046	CCA1025S0036	CCA0836S0043	CCA0848S0085	CCA0822S0038	CCA0844S0050	CCA0982S0040	CCA0892S0050	CCA1082S0022	CCA0698S0168	CCA0795S0033	CCA0941S0014
CCA0904S0059	CCA1027S0015	CCA0836S0091	CCA0848S0091	CCA0822S0061	CCA0846S0034	CCA0983S0018	CCA0892S0053	CCA1082S0023	CCA0698S0189	CCA0795S0046	CCA0941S0018
CCA0904S0060	CCA1027S0023	CCA0836S0101	CCA0848S0093	CCA0822S0063	CCA0846S0041	CCA0983S0040	CCA0894S0017	CCA1084S0026	CCA0698S0195	CCA0795S0068	CCA0941S0061
CCA0904S0108	CCA1027S0075	CCA0836S0102	CCA0848S0096	CCA0822S0066	CCA0847S0001	CCA0984S0074	CCA0897S0011	CCA1084S0031	CCA0698S0202	CCA0799S0014	CCA0941S0065
CCA0904S0121	CCA1033S0006	CCA0836S0111	CCA0849S0038	CCA0824S0020	CCA0848S0012	CCA0986S0030	CCA0897S0014	CCA1084S0032	CCA0698S0213	CCA0799S0016	CCA0941S0066
CCA0905S0040	CCA1033S0012	CCA0838S0042	CCA0849S0051	CCA0824S0033	CCA0848S0052	CCA0986S0036	CCA0897S0019	CCA1084S0045	CCA0698S0220	CCA0799S0026	CCA0941S0083
CCA0905S0053	CCA1033S0030	CCA0838S0043	CCA0849S0054	CCA0824S0038	CCA0848S0057	CCA0986S0072	CCA0897S0023	CCA1085S0012	CCA0698S0234	CCA0799S0044	CCA0942S0049
CCA0905S0054	CCA1033S0056	CCA0838S0048	CCA0849S0060	CCA0824S0042	CCA0848S0058	CCA0986S0084	CCA0897S0077	CCA1085S0017	CCA0700S0009	CCA0799S0049	CCA0942S0069
CCA0905S0056	CCA1033S0057	CCA0838S0059	CCA0849S0061	CCA0824S0043	CCA0848S0065	CCA0989S0051	CCA0897S0097	CCA1085S0054	CCA0700S0027	CCA0799S0076	CCA0942S0088
CCA0905S0072	CCA1034S0017	CCA0838S0076	CCA0849S0076	CCA0824S0064	CCA0848S0067	CCA0990S0002	CCA0897S0105	CCA1087S0011	CCA0700S0061	CCA0799S0082	CCA0944S0008
CCA0905S0095	CCA1034S0020	CCA0838S0090	CCA0849S0084	CCA0826S0029	CCA0848S0068	CCA0990S0062	CCA0897S0111	CCA1089S0028	CCA0700S0062	CCA0799S0101	CCA0944S0015
CCA0905S0119	CCA1034S0049	CCA0838S0104	CCA0849S0088	CCA0826S0044	CCA0848S0073	CCA0990S0073	CCA0897S0117	CCA1091S0006	CCA0700S0066	CCA0799S0103	CCA0944S0045
CCA0906S0003	CCA1035S0013	CCA0839S0003	CCA0851S0017	CCA0828S0029	CCA0848S0081	CCA0991S0015	CCA0897S0141	CCA1091S0032	CCA0700S0094	CCA0799S0108	CCA0944S0069
CCA0906S0006	CCA1037S0003	CCA0839S0008	CCA0851S0040	CCA0828S0057	CCA0848S0083	CCA0991S0016	CCA0897S0151	CCA1091S0034	CCA0700S0102	CCA0799S0145	CCA0947S0023
CCA0906S0016	CCA1038S0001	CCA0839S0048	CCA0851S0043	CCA0828S0064	CCA0848S0097	CCA0991S0022	CCA0897S0161	CCA1091S0041	CCA0700S0123	CCA0800S0005	CCA0947S0055
CCA0906S0053	CCA1041S0009	CCA0839S0055	CCA0851S0050	CCA0828S0090	CCA0848S0101	CCA0993S0004	CCA0897S0164	CCA1091S0048	CCA0700S0142	CCA0800S0014	CCA0947S0056
CCA0906S0057	CCA1041S0024	CCA0839S0056	CCA0851S0054	CCA0829S0025	CCA0848S0109	CCA0994S0001	CCA0898S0007	CCA1091S0053	CCA0701S0015	CCA0800S0024	CCA0949S0024
CCA0906S0101	CCA1041S0030	CCA0839S0057	CCA0851S0064	CCA0829S0037	CCA0849S0010	CCA0998S0013	CCA0898S0015	CCA1094S0012	CCA0701S0026	CCA0800S0027	CCA0949S0031
CCA0907S0004	CCA1041S0038	CCA0839S0081	CCA0851S0106	CCA0829S0051	CCA0849S0080	CCA0998S0014	CCA0898S0048	CCA1094S0064	CCA0701S0043	CCA0800S0045	CCA0949S0057
CCA0907S0008	CCA1041S0040	CCA0839S0109	CCA0851S0130	CCA0829S0068	CCA0849S0086	CCA1002S0021	CCA0898S0064	CCA1094S0074	CCA0701S0045	CCA0800S0046	CCA0951S0024
CCA0907S0028	CCA1041S0048	CCA0839S0113	CCA0851S0167	CCA0831S0020	CCA0851S0015	CCA1002S0023	CCA0898S0080	CCA1094S0081	CCA0701S0060	CCA0800S0071	CCA0953S0028
CCA0907S0034	CCA1041S0050	CCA0839S0121	CCA0851S0168	CCA0831S0026	CCA0851S0046	CCA1002S0037	CCA0898S0084	CCA1094S0082	CCA0701S0088	CCA0800S0075	CCA0953S0049
CCA0907S0043	CCA1041S0058	CCA0839S0136	CCA0852S0008	CCA0831S0027	CCA0851S0063	CCA1002S0051	CCA0898S0088	CCA1094S0098	CCA0701S0096	CCA0800S0092	CCA0953S0081
CCA0907S0051	CCA1041S0074	CCA0839S0151	CCA0852S0020	CCA0831S0029	CCA0851S0073	CCA1002S0060	CCA0898S0101	CCA1094S0104	CCA0701S0099	CCA0800S0102	CCA0953S0087
CCA0907S0100	CCA1041S0076	CCA0839S0156	CCA0852S0021	CCA0831S0033	CCA0851S0084	CCA1002S0068	CCA0898S0102	CCA1094S0143	CCA0701S0106	CCA0800S0105	CCA0953S0091
CCA0908S0001	CCA1045S0030	CCA0839S0158	CCA0852S0025	CCA0831S0043	CCA0851S0085	CCA1002S0087	CCA0898S0109	CCA1095S0016	CCA0701S0129	CCA0800S0122	CCA0957S0001
CCA0909S0036	CCA1046S0014	CCA0839S0164	CCA0852S0027	CCA0831S0050	CCA0851S0095	CCA1002S0089	CCA0899S0056	CCA1095S0020	CCA0701S0131	CCA0800S0129	CCA0958S0006
CCA0909S0051	CCA1046S0099	CCA0843S0018	CCA0852S0056	CCA0831S0052	CCA0851S0097	CCA1005S0050	CCA0899S0077	CCA1095S0043	CCA0701S0133	CCA0800S0130	CCA0961S0027
CCA0909S0054	CCA1046S0117	CCA0843S0021	CCA0852S0083	CCA0831S0069	CCA0851S0118	CCA1005S0057	CCA0903S0015	CCA1095S0050	CCA0701S0138	CCA0803S0017	CCA0961S0036
CCA0909S0064	CCA1047S0001	CCA0843S0024	CCA0852S0092	CCA0831S0070	CCA0851S0133	CCA1008S0003	CCA0903S0016	CCA1095S0075	CCA0701S0139	CCA0803S0049	CCA0961S0080
CCA0910S0006	CCA1048S0009	CCA0843S0028	CCA0853S0002	CCA0833S0001	CCA0851S0150	CCA1008S0015	CCA0903S0022	CCA1095S0085	CCA0701S0140	CCA0803S0069	CCA0961S0101
CCA0912S0007	CCA1048S0028	CCA0843S0046	CCA0853S0025	CCA0834S0039	CCA0851S0155	CCA1013S0025	CCA0903S0024	CCA1095S0086	CCA0701S0155	CCA0803S0074	CCA0961S0102
CCA0912S0010	CCA1048S0040	CCA0843S0047	CCA0853S0028	CCA0836S0007	CCA0851S0170	CCA1013S0029	CCA0903S0034	CCA1095S0097	CCA0704S0028	CCA0803S0080	CCA0961S0127
CCA0912S0011	CCA1048S0042	CCA0846S0005	CCA0854S0001	CCA0836S0051	CCA0851S0179	CCA1013S0045	CCA0903S0060	CCA1097S0002	CCA0704S0039	CCA0803S0103	CCA0961S0128
CCA0912S0014	CCA1048S0051	CCA0846S0006	CCA0854S0013	CCA0836S0055	CCA0851S0199	CCA1013S0059	CCA0904S0004	CCA1097S0037	CCA0704S0079	CCA0803S0108	CCA0961S0132
CCA0912S0022	CCA1048S0054	CCA0846S0009	CCA0854S0024	CCA0836S0061	CCA0852S0007	CCA1013S0079	CCA0904S0013	CCA1097S0050	CCA0704S0082	CCA0803S0110	CCA0961S0133
CCA0912S0083	CCA1051S0036	CCA0846S0010	CCA0854S0025	CCA0836S0075	CCA0852S0024	CCA1013S0098	CCA0904S0022	CCA1097S0067	CCA0704S0121	CCA0803S0111	CCA0964S0026
CCA0917S0001	CCA1051S0076	CCA0846S0052	CCA0854S0069	CCA0836S0080	CCA0852S0071	CCA1015S0019	CCA0904S0061	CCA1097S0071	CCA0704S0124	CCA0803S0123	CCA0964S0032
CCA0918S0004	CCA1051S0095	CCA0848S0014	CCA0854S0077	CCA0836S0092	CCA0852S0076	CCA1015S0106	CCA0904S0069	CCA1097S0083	CCA0704S0128	CCA0803S0133	CCA0964S0039
CCA0918S0012	CCA1052S0035	CCA0848S0019	CCA0854S0085	CCA0836S0099	CCA0852S0077	CCA1015S0121	CCA0904S0077	CCA1100S0007	CCA0704S0133	CCA0803S0137	CCA0964S0050
CCA0918S0044	CCA1052S0048	CCA0848S0021	CCA0854S0096	CCA0836S0108	CCA0852S0080	CCA1015S0123	CCA0904S0086	CCA1100S0009	CCA0704S0143	CCA0806S0004	CCA0964S0055
CCA0918S0061	CCA1054S0007	CCA0848S0023	CCA0856S0001	CCA0838S0027	CCA0852S0082	CCA1015S0124	CCA0904S0090	CCA1100S0020	CCA0704S0164	CCA0806S0035	CCA0964S0060
CCA0918S0088	CCA1054S0010	CCA0848S0047	CCA0857S0015	CCA0838S0054	CCA0852S0089	CCA1016S0031	CCA0904S0098	CCA1106S0024	CCA0705S0043	CCA0806S0041	CCA0964S0061
CCA0918S0117	CCA1055S0018	CCA0848S0086	CCA0857S0021	CCA0838S0056	CCA0853S0004	CCA1016S0036	CCA0904S0099	CCA1106S0026	CCA0705S0047	CCA0806S0042	CCA0964S0072
CCA0918S0130	CCA1055S0035	CCA0848S0100	CCA0857S0031	CCA0838S0057	CCA0853S0024	CCA1017S0031	CCA0904S0111	CCA1107S0002	CCA0705S0060	CCA0806S0046	CCA0968S0001
CCA0918S0132	CCA1057S0020	CCA0848S0103	CCA0857S0039	CCA0838S0058	CCA0854S0002	CCA1022S0016	CCA0904S0122	CCA1107S0006	CCA0705S0071	CCA0806S0054	CCA0968S0015
CCA0918S0146	CCA1057S0027	CCA0848S0110	CCA0857S0043	CCA0838S0071	CCA0854S0057	CCA1024S0019	CCA0904S0132	CCA1107S0007	CCA0705S0102	CCA0806S0060	CCA0968S0029
CCA0918S0151	CCA1057S0048	CCA0848S0112	CCA0857S0045	CCA0838S0073	CCA0854S0064	CCA1025S0008	CCA0904S0150	CCA1108S0009	CCA0708S0002	CCA0806S0065	CCA0968S0040
CCA0918S0167	CCA1057S0075	CCA0849S0012	CCA0857S0046	CCA0838S0101	CCA0854S0067	CCA1025S0035	CCA0904S0160	CCA1111S0030	CCA0708S0031	CCA0806S0093	CCA0970S0033
CCA0918S0180	CCA1060S0007	CCA0849S0014	CCA0859S0036	CCA0839S0038	CCA0854S0091	CCA1027S0037	CCA0904S0177	CCA1111S0035	CCA0708S0061	CCA0806S0106	CCA0973S0024
CCA0922S0013	CCA1060S0012	CCA0849S0022	CCA0859S0048	CCA0839S0042	CCA0857S0009	CCA1027S0065	CCA0904S0181	CCA1113S0014	CCA0708S0068	CCA0806S0116	CCA0973S0038
CCA0922S0017	CCA1063S0002	CCA0849S0047	CCA0859S0052	CCA0839S0074	CCA0857S0026	CCA1027S0077	CCA0904S0190	CCA1113S0015	CCA0708S0080	CCA0808S0001	CCA0973S0039
CCA0923S0038	CCA1063S0035	CCA0849S0049	CCA0859S0054	CCA0839S0075	CCA0857S0048	CCA1027S0079	CCA0904S0195	CCA1113S0031	CCA0708S0083	CCA0810S0112	CCA0973S0042
CCA0924S0025	CCA1063S0049	CCA0849S0075	CCA0859S0072	CCA0839S0084	CCA0859S0002	CCA1029S0033	CCA0904S0207	CCA1115S0012	CCA0708S0084	CCA0813S0017	CCA0973S0052
CCA0925S0010	CCA1063S0054	CCA0849S0077	CCA0859S0081	CCA0839S0094	CCA0859S0032	CCA1031S0022	CCA0904S0214	CCA1115S0016	CCA0708S0094	CCA0813S0024	CCA0975S0013
CCA0925S0025	CCA1066S0021	CCA0849S0081	CCA0859S0088	CCA0839S0101	CCA0859S0064	CCA1031S0027	CCA0905S0020	CCA1118S0006	CCA0708S0098	CCA0813S0027	CCA0975S0019
CCA0925S0031	CCA1068S0002	CCA0849S0083	CCA0859S0104	CCA0839S0102	CCA0859S0066	CCA1033S0016	CCA0905S0026	CCA1118S0024	CCA0708S0108	CCA0813S0032	CCA0975S0026
CCA0925S0034	CCA1068S0003	CCA0849S0087	CCA0859S0110	CCA0839S0103	CCA0859S0069	CCA1033S0028	CCA0905S0112	CCA1118S0026	CCA0708S0112	CCA0813S0056	CCA0975S0029
CCA0925S0042	CCA1073S0031	CCA0851S0014	CCA0859S0113	CCA0839S0120	CCA0859S0070	CCA1033S0037	CCA0905S0127	CCA1118S0030	CCA0708S0120	CCA0813S0085	CCA0975S0032
CCA0925S0052	CCA1073S0034	CCA0851S0018	CCA0859S0120	CCA0839S0123	CCA0859S0083	CCA1034S0007	CCA0905S0130	CCA1118S0033	CCA0708S0121	CCA0816S0026	CCA0975S0037
CCA0925S0067	CCA1073S0061	CCA0851S0052	CCA0859S0130	CCA0839S0126	CCA0859S0084	CCA1034S0014	CCA0906S0019	CCA1118S0040	CCA0708S0124	CCA0816S0034	CCA0975S0041
CCA0925S0078	CCA1074S0039	CCA0851S0053	CCA0859S0166	CCA0839S0131	CCA0859S0121	CCA1034S0038	CCA0906S0032	CCA1120S0005	CCA0708S0128	CCA0816S0046	CCA0975S0049
CCA0925S0085	CCA1074S0041	CCA0851S0060	CCA0859S0195	CCA0839S0147	CCA0859S0132	CCA1034S0041	CCA0906S0034	CCA1120S0011	CCA0709S0005	CCA0816S0083	CCA0975S0104
CCA0925S0088	CCA1075S0028	CCA0851S0066	CCA0861S0009	CCA0839S0169	CCA0859S0134	CCA1034S0056	CCA0906S0041	CCA1120S0024	CCA0709S0019	CCA0816S0085	CCA0975S0105
CCA0925S0115	CCA1075S0036	CCA0851S0071	CCA0861S0032	CCA0842S0007	CCA0859S0146	CCA1034S0067	CCA0906S0046	CCA1122S0001	CCA0709S0020	CCA0816S0086	CCA0977S0025
CCA0929S0043	CCA1075S0044	CCA0851S0075	CCA0861S0036	CCA0842S0014	CCA0859S0165	CCA1035S0010	CCA0906S0047	CCA1123S0043	CCA0709S0024	CCA0816S0117	CCA0977S0030
CCA0929S0055	CCA1075S0047	CCA0851S0080	CCA0861S0055	CCA0842S0016	CCA0859S0175	CCA1037S0015	CCA0906S0052	CCA1123S0079	CCA0709S0030	CCA0816S0131	CCA0977S0050
CCA0929S0058	CCA1079S0005	CCA0851S0101	CCA0862S0035	CCA0842S0028	CCA0859S0181	CCA1037S0017	CCA0906S0055	CCA1123S0082	CCA0709S0062	CCA0819S0006	CCA0979S0026
CCA0929S0075	CCA1079S0043	CCA0851S0102	CCA0862S0043	CCA0842S0046	CCA0859S0189	CCA1037S0032	CCA0906S0061	CCA1123S0085	CCA0709S0063	CCA0819S0008	CCA0979S0036
CCA0929S0094	CCA1079S0046	CCA0851S0109	CCA0862S0046	CCA0843S0019	CCA0859S0194	CCA1039S0016	CCA0906S0093	CCA1123S0104	CCA0709S0078	CCA0819S0035	CCA0981S0029
CCA0932S0023	CCA1079S0059	CCA0851S0115	CCA0862S0058	CCA0843S0020	CCA0860S0001	CCA1039S0020	CCA0906S0096	CCA1124S0001	CCA0709S0085	CCA0819S0044	CCA0981S0034
CCA0932S0034	CCA1079S0060	CCA0851S0120	CCA0862S0083	CCA0843S0062	CCA0861S0015	CCA1039S0034	CCA0907S0001	CCA1126S0024	CCA0709S0096	CCA0819S0056	CCA0981S0048
CCA0935S0015	CCA1082S0001	CCA0851S0124	CCA0862S0088	CCA0843S0077	CCA0861S0021	CCA1039S0054	CCA0907S0003	CCA1126S0041	CCA0709S0101	CCA0819S0058	CCA0981S0064
CCA0935S0024	CCA1082S0003	CCA0851S0135	CCA0862S0096	CCA0843S0078	CCA0861S0023	CCA1041S0006	CCA0907S0007	CCA1126S0063	CCA0709S0106	CCA0822S0007	CCA0982S0015
CCA0935S0047	CCA1084S0049	CCA0851S0138	CCA0862S0097	CCA0844S0022	CCA0861S0029	CCA1041S0042	CCA0907S0030	CCA1126S0089	CCA0709S0109	CCA0822S0013	CCA0982S0020
CCA0935S0055	CCA1085S0034	CCA0851S0143	CCA0862S0115	CCA0846S0019	CCA0861S0057	CCA1041S0043	CCA0907S0033	CCA1128S0001	CCA0711S0015	CCA0822S0024	CCA0982S0057
CCA0935S0067	CCA1089S0031	CCA0851S0145	CCA0862S0125	CCA0846S0021	CCA0861S0058	CCA1041S0047	CCA0907S0052	CCA1128S0009	CCA0711S0020	CCA0822S0026	CCA0983S0016
CCA0936S0037	CCA1089S0043	CCA0851S0153	CCA0862S0129	CCA0846S0037	CCA0862S0013	CCA1041S0060	CCA0907S0064	CCA1130S0040	CCA0711S0031	CCA0822S0027	CCA0983S0055
CCA0936S0038	CCA1091S0044	CCA0851S0158	CCA0865S0001	CCA0846S0051	CCA0862S0018	CCA1041S0067	CCA0907S0071	CCA1132S0037	CCA0711S0043	CCA0822S0034	CCA0984S0008
CCA0936S0060	CCA1094S0017	CCA0851S0159	CCA0866S0013	CCA0848S0016	CCA0862S0023	CCA1041S0087	CCA0907S0075	CCA1133S0001	CCA0711S0046	CCA0822S0050	CCA0984S0012
CCA0940S0020	CCA1094S0053	CCA0851S0164	CCA0866S0038	CCA0848S0025	CCA0862S0024	CCA1045S0014	CCA0909S0023	CCA1134S0008	CCA0711S0047	CCA0822S0051	CCA0984S0019
CCA0940S0024	CCA1094S0054	CCA0851S0205	CCA0869S0017	CCA0848S0032	CCA0862S0028	CCA1046S0027	CCA0909S0031	CCA1134S0035	CCA0711S0048	CCA0822S0052	CCA0984S0043
CCA0940S0041	CCA1094S0058	CCA0852S0011	CCA0869S0018	CCA0848S0035	CCA0862S0033	CCA1046S0028	CCA0909S0037	CCA1134S0039	CCA0711S0058	CCA0822S0056	CCA0986S0040
CCA0940S0046	CCA1094S0085	CCA0852S0034	CCA0869S0038	CCA0848S0036	CCA0862S0045	CCA1046S0032	CCA0909S0044	CCA1134S0048	CCA0712S0001	CCA0822S0062	CCA0986S0045
CCA0940S0063	CCA1094S0092	CCA0852S0035	CCA0869S0039	CCA0848S0050	CCA0862S0047	CCA1046S0044	CCA0909S0047	CCA1134S0050	CCA0716S0028	CCA0822S0076	CCA0986S0047
CCA0940S0064	CCA1094S0093	CCA0852S0043	CCA0869S0045	CCA0848S0062	CCA0862S0052	CCA1046S0050	CCA0909S0050	CCA1135S0006	CCA0716S0032	CCA0824S0023	CCA0986S0060
CCA0941S0009	CCA1094S0107	CCA0852S0044	CCA0869S0053	CCA0848S0063	CCA0862S0060	CCA1046S0055	CCA0909S0052	CCA1135S0007	CCA0716S0043	CCA0824S0025	CCA0986S0070
CCA0941S0032	CCA1094S0112	CCA0852S0051	CCA0869S0076	CCA0848S0074	CCA0862S0079	CCA1046S0094	CCA0909S0061	CCA1135S0008	CCA0716S0066	CCA0824S0044	CCA0986S0078
CCA0941S0094	CCA1095S0025	CCA0852S0072	CCA0869S0078	CCA0848S0092	CCA0862S0093	CCA1048S0002	CCA0909S0063	CCA1140S0024	CCA0716S0069	CCA0824S0046	CCA0990S0019
CCA0942S0006	CCA1095S0026	CCA0852S0084	CCA0870S0006	CCA0848S0114	CCA0862S0101	CCA1048S0018	CCA0909S0069	CCA1140S0066	CCA0716S0074	CCA0824S0061	CCA0990S0022
CCA0942S0013	CCA1095S0048	CCA0852S0090	CCA0870S0050	CCA0848S0116	CCA0862S0132	CCA1048S0027	CCA0909S0070	CCA1143S0033	CCA0716S0077	CCA0824S0063	CCA0990S0030
CCA0942S0037	CCA1095S0099	CCA0852S0098	CCA0870S0054	CCA0849S0016	CCA0864S0013	CCA1048S0046	CCA0909S0072	CCA1144S0019	CCA0716S0102	CCA0824S0066	CCA0990S0056
CCA0942S0040	CCA1097S0045	CCA0852S0100	CCA0874S0011	CCA0849S0019	CCA0869S0047	CCA1051S0019	CCA0909S0076	CCA1144S0038	CCA0718S0028	CCA0824S0082	CCA0990S0058
CCA0942S0041	CCA1097S0074	CCA0853S0029	CCA0874S0019	CCA0849S0026	CCA0870S0011	CCA1051S0048	CCA0909S0077	CCA1146S0001	CCA0718S0029	CCA0824S0089	CCA0990S0059
CCA0942S0042	CCA1097S0077	CCA0854S0004	CCA0874S0025	CCA0849S0029	CCA0870S0024	CCA1051S0066	CCA0909S0089	CCA1147S0011	CCA0718S0030	CCA0824S0095	CCA0990S0065
CCA0942S0064	CCA1097S0078	CCA0854S0012	CCA0874S0031	CCA0849S0035	CCA0870S0037	CCA1051S0087	CCA0910S0012	CCA1147S0013	CCA0718S0031	CCA0824S0116	CCA0991S0054
CCA0942S0100	CCA1100S0028	CCA0854S0015	CCA0874S0032	CCA0849S0055	CCA0870S0042	CCA1051S0090	CCA0912S0037	CCA1151S0052	CCA0718S0036	CCA0826S0007	CCA0991S0061
CCA0944S0019	CCA1100S0035	CCA0854S0017	CCA0876S0044	CCA0849S0072	CCA0874S0018	CCA1052S0004	CCA0912S0065	CCA1151S0094	CCA0718S0046	CCA0826S0008	CCA0991S0072
CCA0944S0044	CCA1106S0011	CCA0854S0051	CCA0876S0048	CCA0851S0007	CCA0874S0022	CCA1052S0019	CCA0912S0078	CCA1153S0003	CCA0718S0070	CCA0826S0020	CCA0991S0077
CCA0947S0035	CCA1106S0022	CCA0854S0058	CCA0876S0068	CCA0851S0026	CCA0874S0027	CCA1052S0043	CCA0912S0080	CCA1154S0016	CCA0718S0074	CCA0826S0040	CCA1002S0025
CCA0947S0038	CCA1106S0023	CCA0854S0101	CCA0876S0074	CCA0851S0034	CCA0874S0029	CCA1052S0062	CCA0912S0103	CCA1157S0011	CCA0718S0079	CCA0826S0066	CCA1002S0027
CCA0947S0051	CCA1106S0048	CCA0854S0110	CCA0876S0084	CCA0851S0035	CCA0874S0033	CCA1052S0067	CCA0918S0007	CCA1157S0021	CCA0718S0086	CCA0826S0078	CCA1002S0042
CCA0949S0010	CCA1106S0067	CCA0854S0111	CCA0877S0005	CCA0851S0069	CCA0876S0023	CCA1052S0068	CCA0918S0008	CCA1157S0027	CCA0718S0092	CCA0828S0001	CCA1005S0030
CCA0949S0020	CCA1107S0005	CCA0857S0024	CCA0877S0013	CCA0851S0072	CCA0877S0010	CCA1054S0008	CCA0918S0010	CCA1161S0022	CCA0718S0107	CCA0828S0004	CCA1005S0065
CCA0949S0058	CCA1107S0008	CCA0857S0025	CCA0877S0014	CCA0851S0081	CCA0877S0018	CCA1054S0011	CCA0918S0016	CCA1163S0011	CCA0718S0112	CCA0828S0016	CCA1005S0068
CCA0949S0059	CCA1108S0013	CCA0857S0035	CCA0877S0019	CCA0851S0100	CCA0877S0029	CCA1054S0028	CCA0918S0017	CCA1164S0021	CCA0718S0133	CCA0828S0021	CCA1008S0001
CCA0953S0014	CCA1111S0034	CCA0857S0054	CCA0877S0021	CCA0851S0104	CCA0877S0039	CCA1054S0033	CCA0918S0056	CCA1168S0021	CCA0718S0147	CCA0828S0022	CCA1013S0017
CCA0953S0017	CCA1111S0039	CCA0857S0056	CCA0877S0046	CCA0851S0127	CCA0877S0048	CCA1055S0022	CCA0918S0057	CCA1168S0023	CCA0721S0015	CCA0828S0039	CCA1013S0021
CCA0953S0021	CCA1114S0001	CCA0857S0064	CCA0877S0050	CCA0851S0148	CCA0877S0056	CCA1055S0027	CCA0918S0062	CCA1172S0025	CCA0721S0031	CCA0828S0059	CCA1013S0084
CCA0953S0034	CCA1118S0028	CCA0857S0071	CCA0877S0057	CCA0851S0160	CCA0879S0048	CCA1055S0051	CCA0918S0068	CCA1173S0032	CCA0724S0012	CCA0829S0008	CCA1015S0022
CCA0953S0036	CCA1118S0032	CCA0859S0007	CCA0877S0059	CCA0851S0165	CCA0879S0078	CCA1055S0053	CCA0918S0139	CCA1179S0003	CCA0724S0021	CCA0829S0009	CCA1015S0024
CCA0953S0077	CCA1120S0020	CCA0859S0026	CCA0879S0003	CCA0851S0169	CCA0879S0081	CCA1055S0062	CCA0918S0147	CCA1184S0018	CCA0724S0030	CCA0829S0014	CCA1015S0039
CCA0953S0082	CCA1120S0033	CCA0859S0028	CCA0879S0025	CCA0851S0173	CCA0879S0085	CCA1055S0066	CCA0918S0158	CCA1184S0022	CCA0724S0054	CCA0829S0029	CCA1015S0079
CCA0953S0099	CCA1120S0063	CCA0859S0037	CCA0879S0080	CCA0851S0176	CCA0879S0099	CCA1056S0043	CCA0918S0179	CCA1184S0025	CCA0724S0076	CCA0829S0040	CCA1015S0093
CCA0954S0006	CCA1123S0022	CCA0859S0041	CCA0879S0092	CCA0851S0177	CCA0881S0118	CCA1057S0011	CCA0918S0184	CCA1184S0036	CCA0728S0001	CCA0829S0041	CCA1015S0118
CCA0954S0040	CCA1123S0025	CCA0859S0045	CCA0879S0101	CCA0851S0206	CCA0883S0030	CCA1057S0023	CCA0918S0187	CCA1184S0038	CCA0729S0040	CCA0829S0045	CCA1016S0005
CCA0957S0013	CCA1123S0065	CCA0859S0061	CCA0879S0104	CCA0851S0218	CCA0883S0039	CCA1057S0044	CCA0918S0193	CCA1187S0016	CCA0729S0052	CCA0829S0065	CCA1016S0008
CCA0957S0026	CCA1126S0047	CCA0859S0065	CCA0879S0105	CCA0852S0009	CCA0884S0022	CCA1057S0065	CCA0922S0018	CCA1189S0002	CCA0733S0008	CCA0829S0074	CCA1016S0035
CCA0957S0036	CCA1126S0051	CCA0859S0068	CCA0879S0108	CCA0852S0010	CCA0884S0030	CCA1057S0074	CCA0922S0021	CCA1191S0025	CCA0733S0009	CCA0829S0075	CCA1016S0038
CCA0958S0013	CCA1130S0006	CCA0859S0071	CCA0881S0001	CCA0852S0019	CCA0884S0091	CCA1057S0083	CCA0922S0050	CCA1194S0047	CCA0733S0016	CCA0829S0080	CCA1016S0041
CCA0958S0022	CCA1130S0017	CCA0859S0075	CCA0881S0015	CCA0852S0031	CCA0884S0121	CCA1060S0003	CCA0922S0051	CCA1197S0003	CCA0733S0028	CCA0829S0082	CCA1017S0016
CCA0961S0010	CCA1130S0033	CCA0859S0077	CCA0881S0018	CCA0852S0046	CCA0884S0122	CCA1060S0019	CCA0923S0009	CCA1197S0021	CCA0733S0041	CCA0831S0007	CCA1020S0003
CCA0961S0019	CCA1130S0051	CCA0859S0085	CCA0881S0056	CCA0852S0066	CCA0884S0123	CCA1063S0058	CCA0923S0013	CCA1199S0010	CCA0733S0082	CCA0831S0053	CCA1020S0017
CCA0961S0062	CCA1132S0034	CCA0859S0089	CCA0881S0059	CCA0852S0068	CCA0884S0127	CCA1066S0040	CCA0923S0014	CCA1199S0046	CCA0733S0085	CCA0831S0057	CCA1021S0001
CCA0961S0097	CCA1134S0046	CCA0859S0094	CCA0881S0064	CCA0853S0009	CCA0884S0146	CCA1068S0005	CCA0923S0033	CCA1199S0060	CCA0733S0087	CCA0834S0004	CCA1022S0003
CCA0961S0117	CCA1135S0004	CCA0859S0098	CCA0881S0079	CCA0853S0013	CCA0884S0149	CCA1068S0026	CCA0923S0036	CCA1210S0001	CCA0733S0088	CCA0834S0005	CCA1022S0014
CCA0964S0019	CCA1135S0026	CCA0859S0099	CCA0881S0088	CCA0854S0011	CCA0884S0151	CCA1068S0029	CCA0923S0046	CCA1212S0001	CCA0733S0114	CCA0834S0012	CCA1024S0006
CCA0964S0020	CCA1135S0027	CCA0859S0122	CCA0881S0089	CCA0854S0033	CCA0884S0202	CCA1068S0038	CCA0923S0065	CCA1212S0016	CCA0733S0116	CCA0834S0052	CCA1024S0015
CCA0964S0067	CCA1138S0013	CCA0859S0135	CCA0881S0096	CCA0854S0034	CCA0886S0005	CCA1071S0006	CCA0924S0003	CCA1217S0054	CCA0733S0117	CCA0836S0004	CCA1024S0020
CCA0964S0073	CCA1139S0001	CCA0859S0141	CCA0881S0103	CCA0854S0060	CCA0886S0013	CCA1071S0029	CCA0924S0004	CCA1219S0041	CCA0733S0119	CCA0836S0024	CCA1024S0029
CCA0965S0020	CCA1140S0028	CCA0859S0174	CCA0881S0107	CCA0854S0080	CCA0887S0002	CCA1071S0039	CCA0924S0014	CCA1219S0060	CCA0736S0024	CCA0836S0025	CCA1025S0026
CCA0968S0039	CCA1140S0029	CCA0859S0192	CCA0881S0109	CCA0854S0083	CCA0887S0025	CCA1073S0005	CCA0924S0037	CCA1220S0006	CCA0736S0036	CCA0836S0065	CCA1027S0021
CCA0968S0042	CCA1140S0049	CCA0861S0008	CCA0881S0111	CCA0854S0103	CCA0887S0039	CCA1073S0020	CCA0925S0018	CCA1223S0008	CCA0736S0048	CCA0836S0069	CCA1027S0053
CCA0973S0004	CCA1141S0030	CCA0861S0011	CCA0881S0112	CCA0857S0022	CCA0887S0041	CCA1073S0021	CCA0925S0019	CCA1223S0018	CCA0736S0049	CCA0838S0017	CCA1027S0074
CCA0973S0021	CCA1143S0009	CCA0861S0027	CCA0883S0006	CCA0857S0028	CCA0887S0055	CCA1073S0024	CCA0925S0022	CCA1223S0033	CCA0736S0060	CCA0838S0030	CCA1029S0013
CCA0973S0023	CCA1143S0010	CCA0862S0009	CCA0883S0007	CCA0857S0029	CCA0887S0062	CCA1074S0040	CCA0925S0048	CCA1223S0052	CCA0736S0075	CCA0838S0039	CCA1031S0008
CCA0973S0032	CCA1143S0024	CCA0862S0051	CCA0883S0013	CCA0857S0074	CCA0887S0097	CCA1074S0047	CCA0925S0055	CCA1225S0028	CCA0736S0082	CCA0838S0046	CCA1032S0001
CCA0973S0045	CCA1143S0025	CCA0862S0076	CCA0883S0025	CCA0857S0075	CCA0887S0098	CCA1074S0055	CCA0925S0057	CCA1229S0006	CCA0736S0084	CCA0838S0066	CCA1033S0041
CCA0973S0053	CCA1143S0036	CCA0862S0082	CCA0883S0027	CCA0859S0011	CCA0887S0103	CCA1074S0068	CCA0925S0060	CCA1233S0013	CCA0736S0101	CCA0838S0072	CCA1033S0043
CCA0975S0006	CCA1144S0008	CCA0862S0091	CCA0884S0005	CCA0859S0012	CCA0887S0120	CCA1078S0028	CCA0925S0087	CCA1236S0011	CCA0737S0010	CCA0838S0074	CCA1033S0053
CCA0975S0021	CCA1144S0030	CCA0862S0108	CCA0884S0006	CCA0859S0016	CCA0888S0022	CCA1079S0038	CCA0929S0106	CCA1236S0014	CCA0737S0032	CCA0838S0085	CCA1034S0016
CCA0975S0065	CCA1147S0036	CCA0862S0120	CCA0884S0035	CCA0859S0040	CCA0888S0043	CCA1079S0041	CCA0932S0007	CCA1240S0020	CCA0737S0052	CCA0838S0088	CCA1034S0036
CCA0975S0118	CCA1147S0048	CCA0862S0123	CCA0884S0083	CCA0859S0051	CCA0888S0045	CCA1079S0064	CCA0932S0035	CCA1244S0045	CCA0737S0080	CCA0838S0091	CCA1034S0052
CCA0977S0012	CCA1151S0011	CCA0862S0134	CCA0884S0085	CCA0859S0080	CCA0891S0032	CCA1079S0066	CCA0935S0003	CCA1244S0046	CCA0737S0112	CCA0838S0095	CCA1037S0011
CCA0977S0015	CCA1151S0037	CCA0864S0008	CCA0884S0086	CCA0859S0096	CCA0891S0035	CCA1082S0005	CCA0935S0013	CCA1244S0049	CCA0737S0113	CCA0838S0096	CCA1039S0036
CCA0977S0022	CCA1151S0061	CCA0866S0032	CCA0884S0097	CCA0859S0101	CCA0891S0041	CCA1082S0026	CCA0935S0045	CCA1247S0011	CCA0743S0002	CCA0839S0018	CCA1039S0037
CCA0977S0046	CCA1151S0067	CCA0866S0039	CCA0884S0109	CCA0859S0108	CCA0892S0001	CCA1082S0035	CCA0935S0049	CCA1250S0006	CCA0743S0010	CCA0839S0047	CCA1039S0064
CCA0977S0054	CCA1151S0087	CCA0869S0026	CCA0884S0128	CCA0859S0137	CCA0892S0022	CCA1082S0037	CCA0935S0052	CCA1250S0036	CCA0743S0020	CCA0839S0052	CCA1041S0011
CCA0977S0063	CCA1157S0025	CCA0869S0071	CCA0884S0156	CCA0859S0143	CCA0894S0001	CCA1084S0004	CCA0936S0012	CCA1250S0037	CCA0743S0034	CCA0839S0053	CCA1041S0019
CCA0979S0006	CCA1159S0012	CCA0870S0045	CCA0884S0171	CCA0859S0148	CCA0894S0029	CCA1084S0010	CCA0940S0003	CCA1250S0040	CCA0743S0044	CCA0839S0070	CCA1041S0027
CCA0979S0007	CCA1159S0016	CCA0874S0023	CCA0884S0172	CCA0859S0150	CCA0894S0037	CCA1084S0021	CCA0940S0016	CCA1250S0050	CCA0743S0045	CCA0839S0077	CCA1041S0028
CCA0979S0009	CCA1161S0011	CCA0874S0056	CCA0884S0174	CCA0859S0151	CCA0897S0025	CCA1085S0003	CCA0940S0027	CCA1250S0057	CCA0743S0063	CCA0839S0083	CCA1041S0029
CCA0979S0020	CCA1163S0036	CCA0874S0063	CCA0884S0193	CCA0859S0158	CCA0897S0041	CCA1085S0047	CCA0940S0030	CCA1250S0069	CCA0747S0067	CCA0839S0088	CCA1041S0035
CCA0979S0040	CCA1164S0009	CCA0874S0070	CCA0884S0199	CCA0859S0190	CCA0897S0042	CCA1085S0056	CCA0940S0044	CCA1250S0092	CCA0748S0014	CCA0839S0091	CCA1041S0064
CCA0981S0002	CCA1167S0012	CCA0874S0071	CCA0884S0209	CCA0861S0005	CCA0897S0049	CCA1085S0064	CCA0940S0053	CCA1250S0098	CCA0748S0019	CCA0839S0095	CCA1045S0039
CCA0981S0012	CCA1167S0022	CCA0876S0033	CCA0886S0060	CCA0861S0025	CCA0897S0055	CCA1087S0015	CCA0941S0022	CCA1251S0029	CCA0748S0020	CCA0839S0098	CCA1045S0050
CCA0981S0018	CCA1168S0022	CCA0876S0058	CCA0887S0006	CCA0862S0004	CCA0897S0067	CCA1089S0027	CCA0941S0026	CCA1255S0020	CCA0748S0060	CCA0839S0099	CCA1046S0007
CCA0981S0033	CCA1168S0043	CCA0876S0063	CCA0887S0057	CCA0862S0007	CCA0897S0099	CCA1090S0001	CCA0941S0040	CCA1255S0022	CCA0748S0072	CCA0839S0105	CCA1046S0041
CCA0981S0035	CCA1172S0015	CCA0876S0085	CCA0887S0066	CCA0862S0040	CCA0897S0104	CCA1091S0033	CCA0941S0053	CCA1255S0027	CCA0748S0094	CCA0839S0106	CCA1046S0052
CCA0982S0002	CCA1173S0006	CCA0877S0015	CCA0887S0071	CCA0862S0048	CCA0897S0107	CCA1091S0049	CCA0941S0079	CCA1261S0016	CCA0748S0102	CCA0839S0110	CCA1046S0060
CCA0982S0004	CCA1173S0012	CCA0877S0041	CCA0887S0107	CCA0862S0055	CCA0897S0120	CCA1091S0057	CCA0941S0092	CCA1261S0040	CCA0749S0005	CCA0839S0112	CCA1046S0084
CCA0982S0017	CCA1178S0007	CCA0877S0053	CCA0887S0128	CCA0862S0056	CCA0897S0127	CCA1094S0009	CCA0941S0095	CCA1261S0041	CCA0749S0022	CCA0839S0127	CCA1046S0088
CCA0982S0021	CCA1178S0028	CCA0877S0055	CCA0888S0004	CCA0862S0061	CCA0897S0128	CCA1094S0024	CCA0941S0110	CCA1263S0017	CCA0754S0039	CCA0839S0141	CCA1046S0092
CCA0982S0022	CCA1179S0024	CCA0879S0023	CCA0888S0017	CCA0862S0066	CCA0897S0179	CCA1094S0047	CCA0942S0004	CCA1263S0024	CCA0754S0042	CCA0839S0149	CCA1046S0118
CCA0982S0035	CCA1181S0001	CCA0879S0039	CCA0890S0013	CCA0862S0070	CCA0897S0183	CCA1094S0055	CCA0942S0057	CCA1268S0005	CCA0754S0055	CCA0839S0157	CCA1046S0119
CCA0982S0052	CCA1181S0020	CCA0879S0046	CCA0890S0047	CCA0862S0074	CCA0898S0025	CCA1094S0060	CCA0942S0070	CCA1268S0009	CCA0754S0056	CCA0842S0011	CCA1048S0044
CCA0983S0009	CCA1181S0021	CCA0879S0052	CCA0890S0079	CCA0862S0098	CCA0898S0040	CCA1094S0061	CCA0942S0078	CCA1273S0002	CCA0754S0106	CCA0842S0017	CCA1051S0002
CCA0983S0036	CCA1184S0020	CCA0879S0058	CCA0890S0080	CCA0862S0100	CCA0898S0041	CCA1094S0063	CCA0942S0097	CCA1273S0027	CCA0754S0137	CCA0842S0039	CCA1051S0003
CCA0983S0053	CCA1184S0054	CCA0879S0079	CCA0891S0040	CCA0862S0116	CCA0898S0051	CCA1094S0070	CCA0944S0035	CCA1273S0029	CCA0754S0140	CCA0843S0032	CCA1051S0043
CCA0983S0066	CCA1185S0001	CCA0879S0096	CCA0892S0009	CCA0862S0119	CCA0898S0059	CCA1094S0072	CCA0944S0036	CCA1277S0023	CCA0754S0144	CCA0843S0041	CCA1051S0068
CCA0984S0013	CCA1187S0032	CCA0881S0013	CCA0892S0010	CCA0862S0124	CCA0898S0074	CCA1094S0078	CCA0944S0038	CCA1277S0027	CCA0754S0145	CCA0843S0061	CCA1051S0072
CCA0984S0024	CCA1188S0007	CCA0881S0043	CCA0892S0030	CCA0862S0127	CCA0898S0106	CCA1094S0083	CCA0944S0039	CCA1277S0035	CCA0754S0151	CCA0843S0073	CCA1051S0088
CCA0984S0033	CCA1188S0017	CCA0881S0054	CCA0892S0041	CCA0862S0131	CCA0899S0038	CCA1094S0122	CCA0947S0013	CCA1278S0007	CCA0754S0153	CCA0843S0087	CCA1052S0029
CCA0984S0056	CCA1188S0019	CCA0881S0068	CCA0897S0006	CCA0862S0137	CCA0899S0043	CCA1095S0001	CCA0947S0016	CCA1278S0009	CCA0754S0158	CCA0843S0098	CCA1052S0039
CCA0984S0064	CCA1191S0004	CCA0881S0077	CCA0897S0020	CCA0864S0018	CCA0899S0080	CCA1095S0006	CCA0947S0037	CCA1280S0004	CCA0754S0176	CCA0844S0004	CCA1052S0059
CCA0984S0075	CCA1191S0008	CCA0881S0083	CCA0897S0026	CCA0866S0033	CCA0899S0096	CCA1095S0062	CCA0949S0025	CCA1280S0007	CCA0754S0180	CCA0846S0002	CCA1052S0070
CCA0986S0008	CCA1191S0028	CCA0881S0090	CCA0897S0032	CCA0869S0003	CCA0901S0008	CCA1097S0005	CCA0949S0043	CCA1280S0015	CCA0757S0016	CCA0846S0004	CCA1053S0001
CCA0986S0011	CCA1194S0021	CCA0881S0094	CCA0897S0037	CCA0869S0006	CCA0901S0014	CCA1097S0040	CCA0949S0044	CCA1281S0027	CCA0757S0032	CCA0848S0005	CCA1055S0047
CCA0986S0027	CCA1194S0022	CCA0881S0116	CCA0897S0045	CCA0869S0046	CCA0903S0039	CCA1097S0043	CCA0949S0051	CCA1282S0024	CCA0757S0056	CCA0848S0009	CCA1055S0071
CCA0986S0075	CCA1197S0004	CCA0883S0018	CCA0897S0056	CCA0869S0052	CCA0903S0040	CCA1097S0052	CCA0949S0052	CCA1285S0028	CCA0757S0066	CCA0848S0011	CCA1056S0009
CCA0986S0080	CCA1197S0014	CCA0884S0009	CCA0897S0113	CCA0869S0075	CCA0904S0005	CCA1097S0087	CCA0949S0060	CCA1285S0029	CCA0757S0070	CCA0848S0022	CCA1056S0010
CCA0986S0082	CCA1197S0022	CCA0884S0015	CCA0897S0126	CCA0870S0013	CCA0904S0015	CCA1102S0001	CCA0951S0031	CCA1285S0038	CCA0757S0078	CCA0848S0030	CCA1056S0035
CCA0989S0022	CCA1197S0025	CCA0884S0023	CCA0898S0020	CCA0870S0044	CCA0904S0037	CCA1106S0038	CCA0951S0037	CCA1287S0006	CCA0757S0084	CCA0848S0031	CCA1056S0038
CCA0989S0045	CCA1199S0023	CCA0884S0034	CCA0898S0027	CCA0873S0001	CCA0904S0038	CCA1106S0044	CCA0953S0027	CCA1287S0058	CCA0762S0012	CCA0848S0043	CCA1057S0007
CCA0989S0048	CCA1199S0036	CCA0884S0040	CCA0898S0076	CCA0874S0013	CCA0904S0089	CCA1106S0045	CCA0953S0041	CCA1287S0072	CCA0762S0014	CCA0848S0098	CCA1057S0012
CCA0990S0023	CCA1199S0058	CCA0884S0048	CCA0898S0082	CCA0874S0020	CCA0904S0091	CCA1107S0025	CCA0953S0051	CCA1288S0038	CCA0762S0052	CCA0848S0099	CCA1057S0016
CCA0991S0028	CCA1199S0066	CCA0884S0050	CCA0898S0095	CCA0874S0050	CCA0904S0118	CCA1111S0005	CCA0953S0060	CCA1288S0065	CCA0762S0075	CCA0848S0102	CCA1057S0038
CCA0991S0044	CCA1199S0088	CCA0884S0077	CCA0899S0012	CCA0874S0054	CCA0904S0148	CCA1111S0019	CCA0953S0064	CCA1288S0074	CCA0763S0004	CCA0848S0108	CCA1057S0050
CCA0991S0056	CCA1202S0001	CCA0884S0082	CCA0899S0035	CCA0874S0061	CCA0904S0187	CCA1111S0021	CCA0953S0066	CCA1288S0076	CCA0763S0009	CCA0848S0111	CCA1057S0079
CCA0991S0058	CCA1203S0037	CCA0884S0093	CCA0899S0078	CCA0876S0038	CCA0904S0188	CCA1111S0027	CCA0953S0096	CCA1289S0017	CCA0763S0018	CCA0849S0024	CCA1057S0081
CCA0991S0067	CCA1209S0019	CCA0884S0104	CCA0899S0084	CCA0876S0046	CCA0904S0201	CCA1111S0032	CCA0954S0026	CCA1294S0036	CCA0763S0064	CCA0849S0033	CCA1060S0013
CCA0991S0087	CCA1212S0005	CCA0884S0107	CCA0903S0001	CCA0876S0077	CCA0904S0205	CCA1111S0048	CCA0954S0027	CCA1300S0009	CCA0763S0068	CCA0849S0050	CCA1060S0015
CCA0998S0003	CCA1212S0015	CCA0884S0111	CCA0903S0011	CCA0876S0081	CCA0905S0055	CCA1113S0003	CCA0954S0028	CCA1300S0014	CCA0763S0080	CCA0849S0065	CCA1060S0016
CCA0998S0026	CCA1213S0001	CCA0884S0144	CCA0903S0021	CCA0877S0008	CCA0905S0076	CCA1113S0021	CCA0954S0031	CCA1300S0019	CCA0763S0093	CCA0849S0073	CCA1060S0050
CCA0998S0046	CCA1217S0001	CCA0884S0145	CCA0904S0035	CCA0877S0009	CCA0905S0124	CCA1113S0022	CCA0954S0038	CCA1300S0022	CCA0765S0020	CCA0849S0078	CCA1061S0014
CCA1002S0014	CCA1217S0005	CCA0884S0160	CCA0904S0042	CCA0877S0034	CCA0906S0007	CCA1118S0001	CCA0957S0004	CCA1301S0017	CCA0765S0032	CCA0851S0076	CCA1061S0021
CCA1002S0029	CCA1217S0006	CCA0884S0164	CCA0904S0044	CCA0877S0042	CCA0906S0008	CCA1118S0007	CCA0957S0028	CCA1302S0003	CCA0765S0038	CCA0851S0098	CCA1063S0028
CCA1002S0062	CCA1217S0028	CCA0884S0169	CCA0904S0049	CCA0879S0030	CCA0906S0013	CCA1118S0023	CCA0958S0023	CCA1306S0015	CCA0765S0055	CCA0851S0123	CCA1063S0056
CCA1002S0074	CCA1217S0048	CCA0884S0210	CCA0904S0058	CCA0879S0066	CCA0906S0038	CCA1118S0027	CCA0961S0017	CCA1310S0012	CCA0765S0065	CCA0851S0132	CCA1063S0072
CCA1002S0094	CCA1217S0049	CCA0884S0214	CCA0904S0065	CCA0879S0071	CCA0906S0039	CCA1118S0064	CCA0961S0045	CCA1310S0043	CCA0765S0072	CCA0851S0147	CCA1066S0027
CCA1005S0020	CCA1219S0009	CCA0886S0008	CCA0904S0083	CCA0879S0083	CCA0906S0058	CCA1120S0006	CCA0961S0047	CCA1312S0024	CCA0770S0022	CCA0851S0151	CCA1066S0028
CCA1005S0055	CCA1219S0014	CCA0886S0018	CCA0904S0088	CCA0879S0089	CCA0906S0062	CCA1120S0014	CCA0961S0057	CCA1320S0008	CCA0774S0026	CCA0851S0178	CCA1069S0001
CCA1005S0058	CCA1220S0029	CCA0886S0034	CCA0904S0109	CCA0879S0090	CCA0906S0067	CCA1120S0039	CCA0961S0098	CCA1320S0010	CCA0774S0032	CCA0851S0180	CCA1071S0032
CCA1005S0073	CCA1220S0036	CCA0886S0037	CCA0904S0128	CCA0879S0091	CCA0906S0071	CCA1120S0049	CCA0961S0131	CCA1321S0001	CCA0774S0033	CCA0851S0183	CCA1071S0040
CCA1008S0029	CCA1221S0004	CCA0886S0042	CCA0904S0136	CCA0881S0005	CCA0907S0006	CCA1123S0004	CCA0964S0033	CCA1324S0009	CCA0774S0051	CCA0851S0184	CCA1071S0041
CCA1008S0031	CCA1221S0024	CCA0886S0048	CCA0904S0140	CCA0881S0010	CCA0907S0042	CCA1123S0005	CCA0964S0034	CCA1326S0002	CCA0774S0066	CCA0851S0209	CCA1073S0009
CCA1010S0001	CCA1223S0007	CCA0887S0007	CCA0904S0157	CCA0881S0012	CCA0907S0044	CCA1123S0014	CCA0964S0046	CCA1326S0016	CCA0774S0074	CCA0851S0220	CCA1074S0018
CCA1013S0014	CCA1223S0015	CCA0887S0008	CCA0904S0159	CCA0881S0021	CCA0907S0056	CCA1123S0034	CCA0964S0053	CCA1326S0020	CCA0774S0087	CCA0852S0015	CCA1074S0021
CCA1013S0033	CCA1223S0017	CCA0887S0009	CCA0904S0164	CCA0881S0022	CCA0907S0070	CCA1123S0068	CCA0964S0063	CCA1327S0010	CCA0774S0088	CCA0852S0029	CCA1074S0029
CCA1013S0046	CCA1223S0020	CCA0887S0038	CCA0904S0168	CCA0881S0025	CCA0909S0027	CCA1123S0094	CCA0964S0069	CCA1330S0049	CCA0779S0006	CCA0852S0045	CCA1074S0044
CCA1013S0070	CCA1223S0025	CCA0887S0040	CCA0904S0182	CCA0881S0026	CCA0909S0033	CCA1126S0008	CCA0964S0084	CCA1332S0014	CCA0779S0035	CCA0852S0055	CCA1074S0054
CCA1013S0072	CCA1223S0028	CCA0887S0054	CCA0904S0189	CCA0881S0028	CCA0909S0046	CCA1126S0009	CCA0968S0013	CCA1334S0013	CCA0779S0043	CCA0852S0059	CCA1074S0057
CCA1015S0035	CCA1225S0005	CCA0887S0069	CCA0905S0012	CCA0881S0031	CCA0909S0065	CCA1126S0012	CCA0970S0004	CCA1337S0003	CCA0779S0048	CCA0852S0073	CCA1074S0065
CCA1015S0045	CCA1228S0002	CCA0887S0070	CCA0905S0016	CCA0881S0062	CCA0909S0099	CCA1126S0034	CCA0970S0018	CCA1340S0004	CCA0779S0058	CCA0852S0081	CCA1075S0039
CCA1015S0057	CCA1228S0020	CCA0887S0104	CCA0905S0022	CCA0881S0072	CCA0910S0004	CCA1126S0077	CCA0973S0013	CCA1340S0009	CCA0779S0066	CCA0852S0091	CCA1075S0041
CCA1015S0090	CCA1228S0036	CCA0889S0001	CCA0905S0023	CCA0881S0075	CCA0910S0031	CCA1126S0088	CCA0973S0015	CCA1340S0016	CCA0779S0068	CCA0853S0012	CCA1079S0025
CCA1015S0125	CCA1228S0039	CCA0890S0015	CCA0905S0035	CCA0881S0076	CCA0910S0032	CCA1126S0092	CCA0973S0030	CCA1343S0009	CCA0779S0070	CCA0854S0010	CCA1079S0027
CCA1015S0127	CCA1228S0050	CCA0890S0053	CCA0905S0036	CCA0881S0087	CCA0912S0005	CCA1128S0005	CCA0973S0034	CCA1343S0023	CCA0779S0082	CCA0854S0019	CCA1079S0033
CCA1016S0025	CCA1228S0056	CCA0890S0071	CCA0905S0050	CCA0881S0097	CCA0912S0013	CCA1128S0006	CCA0973S0036	CCA1344S0012	CCA0779S0112	CCA0854S0027	CCA1079S0051
CCA1016S0030	CCA1228S0059	CCA0890S0076	CCA0905S0078	CCA0883S0002	CCA0912S0015	CCA1128S0010	CCA0973S0051	CCA1348S0001	CCA0779S0114	CCA0854S0040	CCA1082S0011
CCA1016S0032	CCA1233S0006	CCA0890S0077	CCA0905S0110	CCA0883S0014	CCA0912S0017	CCA1130S0009	CCA0973S0064	CCA1348S0002	CCA0779S0118	CCA0854S0056	CCA1082S0012
CCA1017S0003	CCA1236S0009	CCA0890S0078	CCA0906S0004	CCA0884S0025	CCA0912S0038	CCA1130S0048	CCA0975S0016	CCA1348S0013	CCA0779S0124	CCA0854S0059	CCA1082S0016
CCA1020S0025	CCA1240S0023	CCA0891S0001	CCA0906S0086	CCA0884S0032	CCA0912S0044	CCA1134S0036	CCA0975S0025	CCA1348S0019	CCA0779S0131	CCA0854S0086	CCA1082S0033
CCA1022S0024	CCA1241S0001	CCA0891S0014	CCA0906S0087	CCA0884S0044	CCA0912S0060	CCA1134S0052	CCA0975S0033	CCA1350S0009	CCA0779S0138	CCA0854S0099	CCA1082S0051
CCA1024S0023	CCA1244S0013	CCA0891S0025	CCA0906S0099	CCA0884S0045	CCA0912S0066	CCA1135S0011	CCA0975S0064	CCA1350S0015	CCA0779S0145	CCA0854S0104	CCA1084S0001
CCA1025S0034	CCA1250S0014	CCA0891S0036	CCA0907S0002	CCA0884S0055	CCA0912S0071	CCA1135S0012	CCA0975S0066	CCA1351S0003	CCA0779S0150	CCA0854S0105	CCA1084S0011
CCA1027S0001	CCA1250S0026	CCA0891S0042	CCA0907S0012	CCA0884S0068	CCA0912S0072	CCA1140S0009	CCA0975S0077	CCA1351S0011	CCA0779S0153	CCA0854S0106	CCA1084S0029
CCA1027S0007	CCA1250S0030	CCA0891S0048	CCA0907S0017	CCA0884S0071	CCA0912S0073	CCA1140S0010	CCA0975S0108	CCA1351S0020	CCA0779S0155	CCA0857S0023	CCA1085S0031
CCA1027S0040	CCA1250S0048	CCA0891S0050	CCA0907S0018	CCA0884S0084	CCA0912S0079	CCA1140S0016	CCA0975S0120	CCA1353S0001	CCA0779S0173	CCA0857S0052	CCA1087S0013
CCA1027S0041	CCA1250S0051	CCA0892S0006	CCA0907S0020	CCA0884S0096	CCA0912S0096	CCA1140S0057	CCA0975S0123	CCA1353S0009	CCA0779S0191	CCA0857S0055	CCA1089S0003
CCA1027S0070	CCA1250S0052	CCA0894S0002	CCA0907S0036	CCA0884S0102	CCA0912S0099	CCA1141S0001	CCA0975S0127	CCA1363S0017	CCA0779S0210	CCA0857S0067	CCA1089S0008
CCA1029S0001	CCA1250S0059	CCA0894S0024	CCA0907S0055	CCA0884S0105	CCA0912S0102	CCA1144S0011	CCA0977S0001	CCA1363S0033	CCA0779S0222	CCA0857S0102	CCA1089S0021
CCA1031S0025	CCA1250S0096	CCA0897S0007	CCA0907S0065	CCA0884S0106	CCA0914S0011	CCA1144S0012	CCA0977S0056	CCA1363S0054	CCA0779S0223	CCA0859S0001	CCA1089S0029
CCA1031S0033	CCA1251S0033	CCA0897S0064	CCA0907S0093	CCA0884S0108	CCA0914S0014	CCA1144S0041	CCA0977S0062	CCA1365S0015	CCA0779S0246	CCA0859S0003	CCA1091S0036
CCA1031S0037	CCA1251S0039	CCA0897S0065	CCA0909S0032	CCA0884S0112	CCA0914S0015	CCA1151S0021	CCA0979S0012	CCA1370S0035	CCA0779S0269	CCA0859S0044	CCA1091S0039
CCA1033S0011	CCA1251S0040	CCA0897S0079	CCA0909S0075	CCA0884S0125	CCA0914S0040	CCA1151S0030	CCA0979S0014	CCA1371S0015	CCA0781S0008	CCA0859S0053	CCA1091S0042
CCA1033S0026	CCA1252S0015	CCA0897S0094	CCA0912S0026	CCA0884S0138	CCA0918S0026	CCA1151S0049	CCA0979S0021	CCA1371S0024	CCA0781S0044	CCA0859S0067	CCA1093S0001
CCA1033S0046	CCA1255S0004	CCA0897S0098	CCA0912S0031	CCA0884S0162	CCA0918S0032	CCA1151S0056	CCA0979S0030	CCA1377S0015	CCA0781S0046	CCA0859S0082	CCA1094S0003
CCA1034S0004	CCA1260S0014	CCA0897S0102	CCA0912S0068	CCA0884S0212	CCA0918S0040	CCA1151S0078	CCA0979S0039	CCA1381S0017	CCA0781S0069	CCA0859S0123	CCA1094S0007
CCA1034S0019	CCA1261S0004	CCA0897S0103	CCA0912S0105	CCA0886S0022	CCA0918S0085	CCA1151S0088	CCA0981S0032	CCA1382S0002	CCA0781S0080	CCA0859S0176	CCA1094S0018
CCA1034S0029	CCA1261S0015	CCA0897S0106	CCA0912S0106	CCA0886S0024	CCA0918S0104	CCA1154S0018	CCA0981S0038	CCA1384S0004	CCA0782S0001	CCA0859S0185	CCA1094S0044
CCA1034S0034	CCA1263S0031	CCA0897S0108	CCA0912S0110	CCA0886S0047	CCA0918S0106	CCA1154S0036	CCA0981S0054	CCA1384S0027	CCA0782S0017	CCA0861S0007	CCA1094S0080
CCA1034S0069	CCA1263S0048	CCA0897S0112	CCA0914S0002	CCA0886S0052	CCA0918S0116	CCA1157S0030	CCA0981S0060	CCA1384S0028	CCA0782S0075	CCA0861S0024	CCA1094S0111
CCA1037S0020	CCA1268S0026	CCA0897S0114	CCA0914S0016	CCA0887S0028	CCA0918S0137	CCA1157S0034	CCA0981S0071	CCA1384S0031	CCA0782S0100	CCA0862S0012	CCA1094S0114
CCA1039S0025	CCA1271S0007	CCA0897S0143	CCA0914S0030	CCA0887S0031	CCA0918S0141	CCA1159S0005	CCA0982S0001	CCA1385S0002	CCA0782S0105	CCA0862S0030	CCA1095S0027
CCA1039S0043	CCA1273S0013	CCA0897S0155	CCA0916S0010	CCA0887S0044	CCA0918S0149	CCA1161S0014	CCA0982S0005	CCA1385S0004	CCA0782S0149	CCA0862S0039	CCA1095S0029
CCA1039S0053	CCA1273S0021	CCA0897S0158	CCA0916S0012	CCA0887S0052	CCA0918S0165	CCA1163S0022	CCA0982S0016	CCA1385S0006	CCA0782S0150	CCA0862S0044	CCA1095S0049
CCA1039S0060	CCA1273S0031	CCA0897S0172	CCA0916S0020	CCA0887S0060	CCA0918S0168	CCA1163S0023	CCA0982S0037	CCA1385S0007	CCA0782S0152	CCA0862S0063	CCA1095S0056
CCA1039S0061	CCA1273S0033	CCA0897S0175	CCA0918S0009	CCA0887S0061	CCA0918S0171	CCA1163S0024	CCA0982S0038	CCA1386S0012	CCA0782S0155	CCA0862S0069	CCA1095S0082
CCA1041S0023	CCA1273S0038	CCA0897S0178	CCA0918S0028	CCA0887S0067	CCA0918S0188	CCA1164S0004	CCA0982S0060	CCA1390S0013	CCA0782S0158	CCA0862S0090	CCA1095S0089
CCA1041S0032	CCA1273S0041	CCA0898S0002	CCA0918S0033	CCA0887S0085	CCA0918S0200	CCA1168S0003	CCA0983S0056	CCA1391S0021	CCA0783S0001	CCA0862S0092	CCA1095S0090
CCA1041S0046	CCA1273S0042	CCA0898S0009	CCA0918S0042	CCA0887S0095	CCA0918S0201	CCA1168S0027	CCA0984S0021	CCA1391S0023	CCA0784S0004	CCA0862S0126	CCA1095S0100
CCA1041S0054	CCA1273S0043	CCA0898S0013	CCA0918S0066	CCA0887S0096	CCA0922S0016	CCA1168S0032	CCA0984S0039	CCA1391S0056	CCA0784S0011	CCA0866S0001	CCA1097S0013
CCA1041S0077	CCA1273S0046	CCA0898S0021	CCA0918S0080	CCA0887S0099	CCA0922S0022	CCA1168S0037	CCA0984S0047	CCA1391S0062	CCA0784S0048	CCA0866S0017	CCA1097S0014
CCA1045S0008	CCA1275S0006	CCA0898S0024	CCA0918S0098	CCA0887S0101	CCA0922S0036	CCA1168S0042	CCA0986S0042	CCA1392S0005	CCA0784S0056	CCA0866S0035	CCA1097S0032
CCA1045S0019	CCA1275S0014	CCA0898S0029	CCA0918S0103	CCA0887S0105	CCA0923S0028	CCA1172S0008	CCA0986S0043	CCA1397S0021	CCA0784S0058	CCA0869S0030	CCA1097S0072
CCA1045S0020	CCA1277S0020	CCA0898S0091	CCA0918S0105	CCA0887S0112	CCA0923S0040	CCA1172S0012	CCA0986S0053	CCA1402S0002	CCA0784S0089	CCA0869S0031	CCA1097S0076
CCA1045S0025	CCA1277S0030	CCA0898S0108	CCA0918S0126	CCA0887S0113	CCA0924S0030	CCA1173S0010	CCA0987S0001	CCA1403S0017	CCA0784S0100	CCA0869S0032	CCA1097S0086
CCA1045S0044	CCA1277S0059	CCA0903S0046	CCA0918S0131	CCA0887S0116	CCA0924S0031	CCA1178S0014	CCA0990S0008	CCA1403S0024	CCA0784S0101	CCA0869S0037	CCA1097S0089
CCA1046S0038	CCA1277S0068	CCA0903S0052	CCA0918S0135	CCA0890S0005	CCA0925S0013	CCA1179S0005	CCA0990S0021	CCA1406S0008	CCA0784S0141	CCA0870S0048	CCA1097S0090
CCA1046S0077	CCA1278S0012	CCA0903S0053	CCA0918S0136	CCA0890S0008	CCA0925S0020	CCA1179S0008	CCA0990S0069	CCA1407S0004	CCA0784S0142	CCA0870S0049	CCA1098S0004
CCA1046S0100	CCA1278S0045	CCA0903S0062	CCA0918S0138	CCA0890S0027	CCA0925S0039	CCA1179S0017	CCA0991S0011	CCA1407S0007	CCA0784S0144	CCA0874S0036	CCA1098S0005
CCA1046S0102	CCA1278S0054	CCA0903S0065	CCA0918S0160	CCA0890S0028	CCA0925S0073	CCA1181S0023	CCA0991S0029	CCA1407S0011	CCA0784S0160	CCA0874S0046	CCA1100S0013
CCA1046S0106	CCA1279S0006	CCA0903S0074	CCA0918S0169	CCA0890S0044	CCA0925S0084	CCA1184S0017	CCA0991S0031	CCA1407S0042	CCA0784S0171	CCA0874S0047	CCA1106S0015
CCA1046S0121	CCA1282S0016	CCA0903S0086	CCA0918S0172	CCA0890S0054	CCA0925S0089	CCA1184S0033	CCA0998S0016	CCA1407S0048	CCA0784S0178	CCA0876S0022	CCA1107S0001
CCA1046S0128	CCA1282S0035	CCA0904S0006	CCA0918S0205	CCA0890S0067	CCA0929S0007	CCA1184S0050	CCA0998S0022	CCA1409S0011	CCA0786S0006	CCA0876S0040	CCA1107S0028
CCA1048S0004	CCA1283S0002	CCA0904S0023	CCA0918S0207	CCA0891S0038	CCA0929S0011	CCA1191S0012	CCA0998S0037	CCA1409S0020	CCA0786S0010	CCA0876S0061	CCA1107S0031
CCA1048S0019	CCA1285S0008	CCA0904S0045	CCA0922S0025	CCA0891S0053	CCA0929S0021	CCA1191S0014	CCA1000S0006	CCA1410S0016	CCA0786S0025	CCA0876S0078	CCA1108S0010
CCA1048S0020	CCA1287S0024	CCA0904S0062	CCA0922S0048	CCA0892S0014	CCA0929S0022	CCA1191S0018	CCA1000S0014	CCA1410S0028	CCA0786S0027	CCA0876S0080	CCA1111S0040
CCA1048S0032	CCA1287S0033	CCA0904S0063	CCA0922S0057	CCA0892S0024	CCA0929S0046	CCA1194S0014	CCA1000S0020	CCA1410S0033	CCA0789S0009	CCA0877S0016	CCA1111S0049
CCA1048S0039	CCA1287S0051	CCA0904S0064	CCA0923S0012	CCA0892S0042	CCA0929S0054	CCA1194S0026	CCA1002S0005	CCA1410S0039	CCA0789S0029	CCA0877S0026	CCA1113S0004
CCA1051S0023	CCA1287S0053	CCA0904S0081	CCA0923S0015	CCA0894S0004	CCA0929S0071	CCA1194S0029	CCA1002S0032	CCA1410S0041	CCA0789S0050	CCA0877S0027	CCA1115S0022
CCA1051S0030	CCA1287S0085	CCA0904S0096	CCA0923S0023	CCA0894S0018	CCA0929S0082	CCA1194S0040	CCA1002S0035	CCA1410S0056	CCA0789S0055	CCA0879S0015	CCA1118S0051
CCA1051S0031	CCA1288S0024	CCA0904S0110	CCA0923S0039	CCA0897S0012	CCA0929S0083	CCA1196S0008	CCA1002S0039	CCA1410S0059	CCA0789S0074	CCA0879S0032	CCA1120S0062
CCA1051S0032	CCA1288S0039	CCA0904S0119	CCA0923S0049	CCA0897S0029	CCA0932S0016	CCA1197S0007	CCA1002S0058	CCA1413S0010	CCA0789S0085	CCA0879S0073	CCA1120S0074
CCA1051S0038	CCA1288S0040	CCA0904S0134	CCA0923S0058	CCA0897S0036	CCA0935S0002	CCA1197S0012	CCA1002S0061	CCA1413S0018	CCA0789S0099	CCA0881S0016	CCA1123S0015
CCA1051S0047	CCA1289S0001	CCA0904S0135	CCA0923S0067	CCA0897S0038	CCA0935S0016	CCA1199S0027	CCA1002S0073	CCA1422S0005	CCA0789S0115	CCA0881S0019	CCA1123S0018
CCA1051S0075	CCA1289S0005	CCA0904S0143	CCA0924S0010	CCA0897S0044	CCA0935S0028	CCA1199S0070	CCA1002S0090	CCA1422S0031	CCA0789S0140	CCA0881S0023	CCA1123S0021
CCA1052S0008	CCA1289S0009	CCA0904S0152	CCA0924S0012	CCA0897S0078	CCA0935S0065	CCA1203S0006	CCA1005S0001	CCA1425S0015	CCA0791S0006	CCA0881S0057	CCA1123S0070
CCA1052S0034	CCA1292S0001	CCA0904S0153	CCA0924S0017	CCA0897S0085	CCA0936S0015	CCA1203S0008	CCA1005S0004	CCA1433S0016	CCA0791S0011	CCA0881S0066	CCA1123S0096
CCA1052S0040	CCA1294S0012	CCA0904S0165	CCA0924S0018	CCA0897S0119	CCA0936S0021	CCA1203S0030	CCA1005S0005	CCA1439S0018	CCA0791S0016	CCA0881S0074	CCA1123S0099
CCA1052S0063	CCA1296S0016	CCA0904S0196	CCA0924S0019	CCA0897S0138	CCA0936S0029	CCA1204S0011	CCA1005S0007	CCA1441S0008	CCA0791S0036	CCA0883S0017	CCA1123S0103
CCA1054S0013	CCA1298S0010	CCA0904S0206	CCA0924S0027	CCA0897S0146	CCA0936S0031	CCA1204S0012	CCA1005S0010	CCA1441S0026	CCA0791S0057	CCA0883S0036	CCA1126S0031
CCA1054S0023	CCA1300S0005	CCA0905S0007	CCA0924S0032	CCA0897S0147	CCA0936S0063	CCA1206S0014	CCA1005S0013	CCA1445S0006	CCA0791S0070	CCA0883S0052	CCA1126S0035
CCA1054S0043	CCA1300S0012	CCA0905S0009	CCA0924S0033	CCA0898S0008	CCA0940S0006	CCA1210S0014	CCA1008S0002	CCA1446S0001	CCA0791S0084	CCA0884S0008	CCA1126S0037
CCA1055S0046	CCA1300S0036	CCA0905S0021	CCA0924S0038	CCA0898S0014	CCA0940S0010	CCA1212S0014	CCA1008S0018	CCA1451S0001	CCA0795S0023	CCA0884S0011	CCA1126S0049
CCA1057S0009	CCA1302S0006	CCA0905S0034	CCA0924S0052	CCA0898S0017	CCA0940S0021	CCA1219S0034	CCA1008S0033	CCA1451S0013	CCA0795S0024	CCA0884S0014	CCA1126S0059
CCA1057S0026	CCA1306S0031	CCA0905S0051	CCA0925S0002	CCA0898S0022	CCA0940S0025	CCA1219S0039	CCA1008S0035	CCA1453S0018	CCA0795S0043	CCA0884S0058	CCA1126S0091
CCA1057S0037	CCA1310S0008	CCA0905S0060	CCA0925S0028	CCA0898S0060	CCA0940S0048	CCA1219S0042	CCA1013S0002	CCA1453S0019	CCA0795S0067	CCA0884S0070	CCA1128S0011
CCA1057S0058	CCA1310S0019	CCA0905S0077	CCA0925S0029	CCA0898S0066	CCA0941S0082	CCA1219S0049	CCA1013S0030	CCA1453S0032	CCA0795S0071	CCA0884S0078	CCA1130S0011
CCA1057S0059	CCA1310S0021	CCA0905S0091	CCA0925S0035	CCA0898S0094	CCA0941S0084	CCA1219S0050	CCA1013S0049	CCA1453S0047	CCA0795S0086	CCA0884S0080	CCA1130S0027
CCA1057S0067	CCA1315S0007	CCA0905S0093	CCA0925S0043	CCA0898S0097	CCA0941S0091	CCA1220S0014	CCA1013S0057	CCA1456S0001	CCA0799S0003	CCA0884S0095	CCA1132S0002
CCA1057S0070	CCA1315S0009	CCA0905S0099	CCA0925S0047	CCA0898S0116	CCA0942S0016	CCA1221S0001	CCA1013S0076	CCA1456S0040	CCA0799S0018	CCA0884S0103	CCA1132S0010
CCA1060S0004	CCA1315S0015	CCA0905S0122	CCA0925S0054	CCA0898S0119	CCA0942S0021	CCA1221S0027	CCA1013S0085	CCA1466S0001	CCA0799S0022	CCA0884S0140	CCA1135S0015
CCA1060S0005	CCA1315S0017	CCA0905S0125	CCA0925S0068	CCA0899S0034	CCA0942S0038	CCA1223S0023	CCA1015S0018	CCA1479S0021	CCA0799S0028	CCA0884S0180	CCA1138S0019
CCA1060S0023	CCA1315S0018	CCA0905S0129	CCA0925S0077	CCA0899S0042	CCA0942S0068	CCA1223S0045	CCA1015S0036	CCA1495S0012	CCA0799S0029	CCA0884S0190	CCA1140S0042
CCA1063S0020	CCA1320S0004	CCA0906S0011	CCA0925S0093	CCA0899S0071	CCA0942S0071	CCA1223S0054	CCA1015S0052	CCA1498S0010	CCA0799S0032	CCA0884S0196	CCA1140S0051
CCA1063S0025	CCA1320S0012	CCA0906S0027	CCA0925S0094	CCA0901S0004	CCA0942S0075	CCA1225S0015	CCA1015S0054	CCA1498S0048	CCA0799S0039	CCA0884S0200	CCA1141S0004
CCA1063S0081	CCA1322S0006	CCA0906S0036	CCA0925S0098	CCA0901S0012	CCA0942S0079	CCA1228S0004	CCA1015S0067	CCA1498S0053	CCA0799S0047	CCA0884S0215	CCA1141S0007
CCA1066S0017	CCA1324S0008	CCA0906S0040	CCA0929S0018	CCA0903S0029	CCA0944S0020	CCA1228S0011	CCA1015S0077	CCA1503S0008	CCA0799S0050	CCA0886S0014	CCA1141S0010
CCA1068S0011	CCA1324S0029	CCA0906S0049	CCA0929S0020	CCA0903S0043	CCA0944S0027	CCA1228S0024	CCA1015S0085	CCA1503S0031	CCA0799S0071	CCA0886S0015	CCA1143S0008
CCA1068S0033	CCA1324S0032	CCA0906S0051	CCA0929S0023	CCA0903S0050	CCA0944S0042	CCA1233S0018	CCA1015S0087	CCA1503S0044	CCA0799S0085	CCA0886S0031	CCA1144S0015
CCA1068S0039	CCA1324S0049	CCA0906S0069	CCA0929S0034	CCA0903S0075	CCA0944S0046	CCA1235S0006	CCA1015S0094	CCA1505S0001	CCA0799S0089	CCA0886S0056	CCA1144S0018
CCA1071S0024	CCA1326S0013	CCA0906S0077	CCA0929S0049	CCA0904S0036	CCA0944S0047	CCA1236S0002	CCA1015S0109	CCA1505S0014	CCA0799S0095	CCA0887S0001	CCA1145S0001
CCA1071S0025	CCA1326S0032	CCA0906S0081	CCA0929S0050	CCA0904S0052	CCA0944S0059	CCA1236S0007	CCA1015S0117	CCA1507S0016	CCA0799S0104	CCA0887S0012	CCA1147S0014
CCA1073S0018	CCA1330S0045	CCA0906S0084	CCA0929S0065	CCA0904S0056	CCA0944S0081	CCA1236S0023	CCA1016S0012	CCA1511S0034	CCA0800S0033	CCA0887S0013	CCA1147S0022
CCA1073S0019	CCA1330S0046	CCA0906S0089	CCA0929S0103	CCA0904S0068	CCA0947S0002	CCA1236S0024	CCA1016S0033	CCA1514S0001	CCA0800S0035	CCA0887S0024	CCA1147S0031
CCA1073S0026	CCA1334S0010	CCA0906S0091	CCA0929S0127	CCA0904S0080	CCA0947S0018	CCA1244S0015	CCA1016S0043	CCA1519S0039	CCA0800S0052	CCA0887S0036	CCA1147S0038
CCA1073S0047	CCA1338S0001	CCA0907S0014	CCA0932S0003	CCA0904S0097	CCA0949S0034	CCA1250S0010	CCA1016S0046	CCA1519S0042	CCA0800S0060	CCA0887S0045	CCA1147S0041
CCA1073S0056	CCA1340S0024	CCA0907S0024	CCA0932S0005	CCA0904S0103	CCA0949S0037	CCA1250S0017	CCA1017S0022	CCA1524S0004	CCA0800S0073	CCA0887S0046	CCA1151S0010
CCA1073S0057	CCA1343S0008	CCA0907S0032	CCA0932S0006	CCA0904S0116	CCA0949S0045	CCA1250S0062	CCA1017S0025	CCA1524S0006	CCA0800S0088	CCA0887S0063	CCA1151S0032
CCA1074S0031	CCA1343S0040	CCA0907S0035	CCA0932S0046	CCA0904S0120	CCA0949S0048	CCA1250S0068	CCA1020S0005	CCA1524S0030	CCA0800S0106	CCA0887S0072	CCA1151S0047
CCA1075S0002	CCA1343S0043	CCA0907S0045	CCA0932S0051	CCA0904S0126	CCA0949S0054	CCA1250S0074	CCA1020S0019	CCA1524S0046	CCA0800S0116	CCA0887S0080	CCA1151S0065
CCA1075S0055	CCA1344S0020	CCA0907S0046	CCA0935S0005	CCA0904S0137	CCA0951S0023	CCA1250S0078	CCA1020S0024	CCA1524S0074	CCA0800S0131	CCA0887S0086	CCA1151S0076
CCA1075S0065	CCA1348S0012	CCA0907S0047	CCA0935S0011	CCA0904S0138	CCA0951S0028	CCA1251S0009	CCA1022S0019	CCA1525S0012	CCA0800S0143	CCA0887S0087	CCA1154S0017
CCA1075S0066	CCA1348S0037	CCA0907S0050	CCA0935S0027	CCA0904S0158	CCA0951S0047	CCA1251S0018	CCA1022S0021	CCA1526S0013	CCA0802S0001	CCA0887S0091	CCA1156S0001
CCA1078S0008	CCA1350S0006	CCA0907S0061	CCA0936S0020	CCA0904S0166	CCA0953S0001	CCA1251S0020	CCA1022S0025	CCA1526S0019	CCA0803S0030	CCA0887S0117	CCA1157S0036
CCA1078S0010	CCA1351S0006	CCA0907S0067	CCA0936S0040	CCA0904S0167	CCA0953S0019	CCA1251S0035	CCA1024S0005	CCA1531S0001	CCA0803S0046	CCA0887S0118	CCA1157S0041
CCA1078S0026	CCA1351S0009	CCA0907S0081	CCA0936S0064	CCA0904S0174	CCA0953S0024	CCA1252S0002	CCA1024S0022	CCA1531S0007	CCA0803S0055	CCA0888S0003	CCA1161S0002
CCA1079S0044	CCA1351S0024	CCA0907S0094	CCA0936S0069	CCA0904S0183	CCA0953S0032	CCA1255S0024	CCA1025S0016	CCA1531S0012	CCA0803S0058	CCA0888S0006	CCA1163S0015
CCA1079S0055	CCA1353S0002	CCA0909S0003	CCA0941S0039	CCA0904S0185	CCA0953S0035	CCA1257S0007	CCA1025S0023	CCA1531S0017	CCA0803S0061	CCA0888S0007	CCA1164S0018
CCA1079S0069	CCA1357S0008	CCA0909S0022	CCA0941S0049	CCA0904S0211	CCA0953S0037	CCA1257S0022	CCA1027S0008	CCA1539S0040	CCA0803S0065	CCA0888S0018	CCA1164S0028
CCA1079S0072	CCA1357S0012	CCA0909S0034	CCA0941S0055	CCA0905S0003	CCA0953S0045	CCA1257S0024	CCA1027S0049	CCA1540S0011	CCA0803S0068	CCA0888S0024	CCA1167S0027
CCA1079S0082	CCA1357S0024	CCA0909S0048	CCA0941S0067	CCA0905S0004	CCA0953S0075	CCA1257S0048	CCA1027S0056	CCA1541S0008	CCA0803S0083	CCA0888S0038	CCA1168S0006
CCA1082S0031	CCA1363S0009	CCA0909S0060	CCA0941S0086	CCA0905S0005	CCA0953S0078	CCA1260S0001	CCA1027S0058	CCA1541S0016	CCA0803S0102	CCA0888S0047	CCA1168S0007
CCA1082S0034	CCA1363S0043	CCA0909S0074	CCA0941S0087	CCA0905S0006	CCA0954S0014	CCA1261S0018	CCA1027S0072	CCA1545S0011	CCA0803S0105	CCA0890S0002	CCA1168S0010
CCA1082S0060	CCA1363S0045	CCA0909S0083	CCA0941S0088	CCA0905S0010	CCA0954S0030	CCA1261S0063	CCA1029S0007	CCA1545S0012	CCA0803S0124	CCA0890S0003	CCA1172S0009
CCA1084S0036	CCA1363S0048	CCA0909S0093	CCA0941S0107	CCA0905S0030	CCA0957S0005	CCA1263S0008	CCA1029S0010	CCA1545S0028	CCA0803S0128	CCA0890S0006	CCA1172S0011
CCA1084S0037	CCA1363S0055	CCA0909S0094	CCA0941S0115	CCA0905S0033	CCA0957S0022	CCA1263S0012	CCA1029S0038	CCA1548S0019	CCA0806S0003	CCA0890S0010	CCA1172S0028
CCA1084S0046	CCA1364S0012	CCA0912S0023	CCA0942S0022	CCA0905S0073	CCA0957S0023	CCA1263S0040	CCA1031S0029	CCA1551S0007	CCA0806S0030	CCA0890S0011	CCA1173S0008
CCA1085S0007	CCA1364S0017	CCA0912S0024	CCA0942S0061	CCA0905S0085	CCA0957S0037	CCA1263S0042	CCA1031S0032	CCA1553S0001	CCA0806S0036	CCA0890S0057	CCA1173S0029
CCA1085S0016	CCA1364S0022	CCA0912S0025	CCA0942S0062	CCA0905S0090	CCA0957S0038	CCA1268S0007	CCA1033S0014	CCA1553S0009	CCA0806S0045	CCA0890S0059	CCA1178S0023
CCA1085S0045	CCA1365S0017	CCA0912S0058	CCA0942S0081	CCA0905S0094	CCA0958S0002	CCA1268S0008	CCA1033S0024	CCA1553S0012	CCA0806S0113	CCA0891S0003	CCA1181S0017
CCA1085S0066	CCA1369S0009	CCA0912S0081	CCA0942S0084	CCA0905S0120	CCA0958S0005	CCA1268S0032	CCA1033S0055	CCA1554S0005	CCA0806S0123	CCA0891S0024	CCA1181S0019
CCA1087S0014	CCA1370S0005	CCA0913S0001	CCA0942S0098	CCA0905S0121	CCA0958S0012	CCA1271S0001	CCA1034S0013	CCA1559S0028	CCA0810S0007	CCA0891S0056	CCA1181S0022
CCA1089S0033	CCA1371S0005	CCA0916S0016	CCA0944S0048	CCA0905S0134	CCA0958S0014	CCA1273S0017	CCA1034S0018	CCA1561S0006	CCA0810S0015	CCA0892S0013	CCA1184S0009
CCA1091S0003	CCA1371S0010	CCA0918S0005	CCA0944S0051	CCA0906S0024	CCA0958S0039	CCA1273S0018	CCA1034S0057	CCA1563S0009	CCA0810S0050	CCA0892S0023	CCA1187S0041
CCA1091S0004	CCA1373S0004	CCA0918S0030	CCA0944S0054	CCA0906S0026	CCA0958S0040	CCA1273S0028	CCA1035S0014	CCA1564S0017	CCA0810S0062	CCA0892S0038	CCA1188S0003
CCA1091S0058	CCA1377S0017	CCA0918S0035	CCA0944S0073	CCA0906S0028	CCA0961S0011	CCA1273S0048	CCA1037S0005	CCA1564S0018	CCA0810S0086	CCA0894S0023	CCA1188S0011
CCA1094S0039	CCA1377S0022	CCA0918S0047	CCA0944S0074	CCA0906S0029	CCA0961S0021	CCA1273S0051	CCA1037S0027	CCA1565S0020	CCA0810S0091	CCA0897S0002	CCA1191S0020
CCA1094S0042	CCA1379S0009	CCA0918S0059	CCA0947S0022	CCA0906S0033	CCA0961S0035	CCA1277S0032	CCA1039S0024	CCA1566S0005	CCA0810S0097	CCA0897S0021	CCA1191S0021
CCA1094S0067	CCA1386S0006	CCA0918S0060	CCA0947S0029	CCA0906S0037	CCA0961S0039	CCA1277S0034	CCA1039S0046	CCA1567S0008	CCA0810S0108	CCA0897S0034	CCA1191S0027
CCA1094S0068	CCA1386S0015	CCA0918S0067	CCA0947S0032	CCA0906S0045	CCA0961S0044	CCA1277S0050	CCA1041S0013	CCA1567S0010	CCA0813S0040	CCA0897S0046	CCA1194S0038
CCA1094S0071	CCA1388S0035	CCA0918S0083	CCA0949S0002	CCA0906S0063	CCA0961S0059	CCA1277S0065	CCA1041S0016	CCA1568S0016	CCA0813S0042	CCA0897S0083	CCA1194S0042
CCA1094S0073	CCA1390S0034	CCA0918S0113	CCA0949S0026	CCA0906S0064	CCA0961S0064	CCA1277S0067	CCA1041S0021	CCA1573S0027	CCA0813S0071	CCA0897S0084	CCA1194S0049
CCA1094S0097	CCA1390S0037	CCA0918S0120	CCA0949S0027	CCA0906S0074	CCA0961S0091	CCA1277S0071	CCA1041S0033	CCA1575S0016	CCA0813S0074	CCA0897S0109	CCA1196S0013
CCA1094S0120	CCA1391S0022	CCA0918S0159	CCA0949S0049	CCA0906S0085	CCA0961S0129	CCA1279S0007	CCA1041S0051	CCA1577S0007	CCA0813S0086	CCA0897S0123	CCA1197S0001
CCA1094S0124	CCA1394S0037	CCA0918S0166	CCA0949S0055	CCA0906S0095	CCA0964S0015	CCA1279S0014	CCA1041S0053	CCA1577S0015	CCA0813S0087	CCA0897S0131	CCA1199S0007
CCA1095S0003	CCA1397S0003	CCA0918S0185	CCA0949S0069	CCA0907S0025	CCA0964S0021	CCA1279S0022	CCA1041S0056	CCA1577S0016	CCA0813S0096	CCA0897S0139	CCA1199S0015
CCA1095S0040	CCA1397S0005	CCA0918S0199	CCA0951S0027	CCA0907S0039	CCA0964S0027	CCA1279S0029	CCA1041S0057	CCA1577S0017	CCA0816S0020	CCA0897S0140	CCA1199S0029
CCA1095S0076	CCA1397S0018	CCA0918S0212	CCA0951S0036	CCA0907S0053	CCA0964S0042	CCA1279S0035	CCA1041S0071	CCA1577S0029	CCA0816S0036	CCA0897S0144	CCA1199S0040
CCA1095S0095	CCA1400S0005	CCA0919S0006	CCA0951S0039	CCA0907S0058	CCA0964S0043	CCA1279S0037	CCA1041S0073	CCA1577S0042	CCA0816S0041	CCA0897S0149	CCA1199S0063
CCA1097S0003	CCA1403S0013	CCA0922S0010	CCA0953S0046	CCA0907S0072	CCA0964S0057	CCA1279S0048	CCA1041S0078	CCA1579S0004	CCA0816S0042	CCA0897S0153	CCA1199S0079
CCA1097S0010	CCA1403S0020	CCA0922S0020	CCA0953S0079	CCA0907S0084	CCA0965S0018	CCA1280S0018	CCA1041S0092	CCA1581S0016	CCA0816S0068	CCA0897S0154	CCA1199S0080
CCA1097S0035	CCA1403S0029	CCA0923S0001	CCA0953S0092	CCA0907S0086	CCA0965S0021	CCA1281S0012	CCA1045S0009	CCA1581S0023	CCA0816S0094	CCA0898S0006	CCA1203S0035
CCA1097S0039	CCA1403S0033	CCA0923S0006	CCA0953S0094	CCA0909S0017	CCA0966S0001	CCA1282S0004	CCA1045S0032	CCA1584S0003	CCA0816S0095	CCA0898S0037	CCA1207S0001
CCA1097S0064	CCA1407S0008	CCA0923S0010	CCA0954S0039	CCA0909S0028	CCA0968S0008	CCA1285S0003	CCA1045S0047	CCA1587S0017	CCA0816S0103	CCA0898S0044	CCA1209S0003
CCA1097S0080	CCA1407S0027	CCA0923S0016	CCA0957S0033	CCA0909S0049	CCA0968S0011	CCA1285S0025	CCA1046S0078	CCA1587S0027	CCA0816S0105	CCA0898S0061	CCA1209S0006
CCA1100S0005	CCA1410S0017	CCA0923S0017	CCA0957S0039	CCA0909S0062	CCA0968S0044	CCA1285S0043	CCA1046S0086	CCA1588S0006	CCA0816S0107	CCA0898S0063	CCA1209S0009
CCA1100S0011	CCA1410S0034	CCA0923S0029	CCA0958S0007	CCA0909S0066	CCA0973S0005	CCA1287S0008	CCA1046S0104	CCA1589S0006	CCA0816S0108	CCA0898S0065	CCA1209S0017
CCA1106S0012	CCA1410S0036	CCA0924S0005	CCA0958S0027	CCA0910S0014	CCA0973S0011	CCA1287S0010	CCA1048S0008	CCA1589S0021	CCA0816S0113	CCA0898S0111	CCA1210S0021
CCA1106S0037	CCA1410S0060	CCA0924S0021	CCA0958S0030	CCA0910S0016	CCA0973S0012	CCA1287S0019	CCA1048S0055	CCA1591S0012	CCA0816S0129	CCA0898S0120	CCA1217S0020
CCA1107S0004	CCA1420S0003	CCA0924S0022	CCA0961S0020	CCA0910S0020	CCA0973S0033	CCA1287S0032	CCA1051S0056	CCA1593S0023	CCA0816S0144	CCA0899S0004	CCA1217S0024
CCA1107S0026	CCA1420S0012	CCA0924S0035	CCA0961S0049	CCA0912S0064	CCA0973S0043	CCA1287S0041	CCA1051S0061	CCA1594S0008	CCA0816S0149	CCA0899S0047	CCA1219S0005
CCA1107S0040	CCA1430S0032	CCA0925S0003	CCA0961S0055	CCA0912S0067	CCA0975S0038	CCA1287S0043	CCA1051S0062	CCA1594S0020	CCA0816S0154	CCA0899S0057	CCA1219S0016
CCA1108S0005	CCA1433S0014	CCA0925S0004	CCA0961S0085	CCA0912S0070	CCA0975S0042	CCA1287S0050	CCA1051S0086	CCA1596S0020	CCA0819S0001	CCA0899S0073	CCA1219S0019
CCA1108S0024	CCA1439S0003	CCA0925S0011	CCA0961S0103	CCA0912S0076	CCA0975S0043	CCA1287S0062	CCA1052S0012	CCA1599S0007	CCA0819S0007	CCA0901S0003	CCA1219S0021
CCA1111S0002	CCA1453S0037	CCA0925S0049	CCA0961S0113	CCA0916S0002	CCA0975S0050	CCA1287S0063	CCA1052S0015	CCA1599S0014	CCA0819S0036	CCA0903S0004	CCA1219S0031
CCA1111S0003	CCA1453S0045	CCA0925S0061	CCA0961S0114	CCA0916S0004	CCA0975S0058	CCA1287S0064	CCA1052S0022	CCA1601S0016	CCA0819S0070	CCA0903S0005	CCA1219S0065
CCA1111S0018	CCA1453S0049	CCA0925S0065	CCA0964S0016	CCA0918S0003	CCA0975S0071	CCA1287S0078	CCA1052S0036	CCA1601S0020	CCA0822S0031	CCA0903S0012	CCA1219S0069
CCA1111S0036	CCA1453S0066	CCA0925S0080	CCA0964S0017	CCA0918S0014	CCA0975S0074	CCA1287S0086	CCA1052S0044	CCA1601S0024	CCA0822S0037	CCA0903S0025	CCA1220S0032
CCA1111S0041	CCA1453S0067	CCA0925S0086	CCA0964S0036	CCA0918S0024	CCA0975S0091	CCA1287S0093	CCA1052S0050	CCA1602S0005	CCA0822S0048	CCA0903S0042	CCA1221S0019
CCA1111S0050	CCA1456S0018	CCA0929S0015	CCA0964S0062	CCA0918S0025	CCA0975S0092	CCA1287S0094	CCA1052S0051	CCA1606S0023	CCA0822S0057	CCA0903S0079	CCA1223S0027
CCA1113S0016	CCA1456S0032	CCA0929S0017	CCA0968S0032	CCA0918S0034	CCA0975S0093	CCA1288S0004	CCA1052S0060	CCA1606S0026	CCA0822S0074	CCA0903S0089	CCA1223S0051
CCA1118S0004	CCA1458S0005	CCA0929S0025	CCA0968S0046	CCA0918S0038	CCA0975S0132	CCA1288S0017	CCA1054S0003	CCA1606S0033	CCA0822S0088	CCA0904S0017	CCA1225S0021
CCA1118S0008	CCA1458S0039	CCA0929S0060	CCA0973S0029	CCA0918S0039	CCA0977S0002	CCA1289S0010	CCA1055S0011	CCA1612S0001	CCA0824S0026	CCA0904S0054	CCA1225S0022
CCA1118S0012	CCA1460S0001	CCA0929S0061	CCA0973S0037	CCA0918S0045	CCA0977S0024	CCA1291S0011	CCA1055S0014	CCA1616S0009	CCA0824S0029	CCA0904S0106	CCA1228S0014
CCA1118S0029	CCA1463S0004	CCA0929S0081	CCA0975S0001	CCA0918S0052	CCA0977S0040	CCA1294S0023	CCA1055S0050	CCA1620S0016	CCA0824S0041	CCA0904S0113	CCA1228S0030
CCA1118S0046	CCA1467S0004	CCA0929S0093	CCA0975S0035	CCA0918S0053	CCA0977S0044	CCA1298S0009	CCA1056S0001	CCA1622S0007	CCA0824S0054	CCA0904S0125	CCA1228S0052
CCA1119S0009	CCA1467S0005	CCA0929S0104	CCA0975S0039	CCA0918S0055	CCA0977S0047	CCA1301S0006	CCA1057S0019	CCA1628S0009	CCA0824S0068	CCA0904S0127	CCA1228S0062
CCA1120S0055	CCA1469S0001	CCA0929S0107	CCA0975S0044	CCA0918S0063	CCA0977S0051	CCA1301S0012	CCA1057S0036	CCA1632S0003	CCA0824S0088	CCA0904S0145	CCA1235S0011
CCA1120S0078	CCA1479S0022	CCA0929S0114	CCA0975S0059	CCA0918S0065	CCA0979S0017	CCA1301S0026	CCA1057S0051	CCA1632S0008	CCA0824S0097	CCA0904S0146	CCA1236S0028
CCA1123S0074	CCA1480S0009	CCA0929S0115	CCA0975S0085	CCA0918S0079	CCA0979S0025	CCA1301S0027	CCA1057S0053	CCA1637S0003	CCA0824S0106	CCA0904S0147	CCA1244S0005
CCA1123S0080	CCA1493S0001	CCA0929S0117	CCA0975S0112	CCA0918S0082	CCA0979S0035	CCA1306S0005	CCA1057S0054	CCA1637S0028	CCA0826S0001	CCA0904S0156	CCA1244S0007
CCA1123S0084	CCA1498S0007	CCA0929S0122	CCA0975S0117	CCA0918S0086	CCA0981S0037	CCA1310S0002	CCA1057S0063	CCA1638S0006	CCA0826S0005	CCA0904S0162	CCA1244S0024
CCA1126S0023	CCA1498S0011	CCA0931S0001	CCA0975S0134	CCA0918S0092	CCA0981S0074	CCA1310S0005	CCA1060S0049	CCA1638S0007	CCA0826S0025	CCA0904S0163	CCA1244S0025
CCA1126S0029	CCA1498S0051	CCA0932S0002	CCA0977S0049	CCA0918S0093	CCA0982S0006	CCA1310S0026	CCA1061S0003	CCA1638S0013	CCA0826S0032	CCA0904S0169	CCA1250S0009
CCA1126S0039	CCA1502S0004	CCA0932S0012	CCA0977S0066	CCA0918S0099	CCA0982S0026	CCA1310S0050	CCA1063S0001	CCA1640S0009	CCA0826S0033	CCA0904S0175	CCA1250S0066
CCA1126S0040	CCA1503S0013	CCA0932S0032	CCA0977S0069	CCA0918S0114	CCA0982S0039	CCA1310S0053	CCA1063S0005	CCA1644S0027	CCA0826S0038	CCA0904S0184	CCA1250S0073
CCA1126S0065	CCA1503S0034	CCA0932S0050	CCA0979S0022	CCA0918S0115	CCA0983S0022	CCA1312S0002	CCA1063S0013	CCA1648S0012	CCA0826S0054	CCA0904S0194	CCA1251S0022
CCA1126S0067	CCA1503S0040	CCA0935S0033	CCA0979S0038	CCA0918S0129	CCA0983S0034	CCA1312S0012	CCA1063S0023	CCA1651S0001	CCA0826S0055	CCA0904S0197	CCA1251S0030
CCA1126S0079	CCA1505S0006	CCA0935S0038	CCA0981S0011	CCA0918S0143	CCA0984S0036	CCA1312S0028	CCA1063S0053	CCA1655S0012	CCA0826S0076	CCA0904S0208	CCA1252S0007
CCA1128S0012	CCA1511S0008	CCA0936S0005	CCA0981S0046	CCA0918S0155	CCA0984S0037	CCA1315S0003	CCA1063S0064	CCA1656S0003	CCA0828S0011	CCA0905S0014	CCA1252S0012
CCA1130S0023	CCA1515S0006	CCA0936S0007	CCA0981S0073	CCA0918S0173	CCA0984S0045	CCA1322S0013	CCA1066S0034	CCA1656S0006	CCA0828S0014	CCA0905S0018	CCA1257S0053
CCA1130S0034	CCA1519S0031	CCA0936S0035	CCA0982S0008	CCA0918S0186	CCA0984S0046	CCA1324S0001	CCA1068S0023	CCA1656S0007	CCA0828S0025	CCA0905S0024	CCA1257S0065
CCA1132S0020	CCA1524S0044	CCA0936S0041	CCA0982S0032	CCA0918S0191	CCA0984S0055	CCA1324S0046	CCA1068S0031	CCA1660S0003	CCA0828S0048	CCA0905S0027	CCA1261S0005
CCA1132S0026	CCA1524S0056	CCA0936S0055	CCA0982S0054	CCA0918S0194	CCA0984S0058	CCA1326S0003	CCA1068S0035	CCA1660S0004	CCA0828S0055	CCA0905S0029	CCA1261S0006
CCA1132S0032	CCA1524S0060	CCA0936S0065	CCA0982S0059	CCA0918S0214	CCA0984S0068	CCA1326S0007	CCA1071S0021	CCA1660S0005	CCA0828S0061	CCA0905S0044	CCA1261S0024
CCA1132S0048	CCA1524S0079	CCA0940S0009	CCA0983S0019	CCA0919S0012	CCA0986S0006	CCA1326S0019	CCA1071S0023	CCA1663S0002	CCA0828S0074	CCA0905S0049	CCA1261S0039
CCA1134S0045	CCA1525S0002	CCA0940S0013	CCA0983S0038	CCA0922S0047	CCA0986S0035	CCA1326S0021	CCA1071S0028	CCA1663S0005	CCA0829S0006	CCA0905S0074	CCA1261S0044
CCA1140S0008	CCA1525S0013	CCA0940S0028	CCA0983S0044	CCA0922S0053	CCA0986S0041	CCA1326S0037	CCA1071S0030	CCA1663S0010	CCA0829S0024	CCA0905S0089	CCA1263S0020
CCA1140S0026	CCA1526S0002	CCA0940S0037	CCA0983S0068	CCA0923S0030	CCA0986S0044	CCA1327S0008	CCA1073S0042	CCA1663S0011	CCA0829S0060	CCA0905S0105	CCA1263S0021
CCA1140S0046	CCA1526S0010	CCA0940S0040	CCA0984S0011	CCA0923S0034	CCA0986S0052	CCA1327S0017	CCA1073S0052	CCA1672S0005	CCA0829S0071	CCA0905S0106	CCA1263S0044
CCA1140S0053	CCA1526S0014	CCA0940S0047	CCA0984S0022	CCA0923S0037	CCA0986S0076	CCA1330S0002	CCA1074S0048	CCA1672S0010	CCA0829S0096	CCA0905S0107	CCA1268S0013
CCA1144S0017	CCA1526S0017	CCA0940S0052	CCA0984S0066	CCA0923S0063	CCA0986S0087	CCA1330S0009	CCA1074S0050	CCA1672S0012	CCA0830S0001	CCA0905S0108	CCA1268S0030
CCA1147S0025	CCA1526S0023	CCA0940S0055	CCA0984S0067	CCA0924S0002	CCA0989S0029	CCA1332S0003	CCA1074S0070	CCA1673S0034	CCA0831S0014	CCA0905S0116	CCA1268S0035
CCA1147S0037	CCA1528S0024	CCA0941S0002	CCA0986S0004	CCA0925S0006	CCA0990S0041	CCA1332S0004	CCA1074S0071	CCA1686S0002	CCA0831S0032	CCA0905S0128	CCA1273S0011
CCA1151S0001	CCA1528S0037	CCA0941S0012	CCA0986S0054	CCA0925S0072	CCA0990S0042	CCA1339S0016	CCA1075S0023	CCA1686S0012	CCA0834S0029	CCA0905S0131	CCA1273S0020
CCA1151S0008	CCA1528S0039	CCA0941S0046	CCA0986S0056	CCA0925S0076	CCA0990S0064	CCA1339S0018	CCA1079S0023	CCA1692S0004	CCA0834S0035	CCA0905S0133	CCA1273S0047
CCA1151S0014	CCA1529S0013	CCA0941S0052	CCA0986S0061	CCA0925S0081	CCA0991S0013	CCA1343S0010	CCA1079S0032	CCA1705S0004	CCA0834S0045	CCA0906S0005	CCA1277S0003
CCA1151S0034	CCA1529S0014	CCA0941S0068	CCA0986S0064	CCA0925S0103	CCA0991S0030	CCA1343S0014	CCA1079S0053	CCA1705S0015	CCA0834S0049	CCA0906S0014	CCA1277S0019
CCA1151S0055	CCA1530S0002	CCA0941S0072	CCA0986S0068	CCA0929S0003	CCA0991S0037	CCA1343S0036	CCA1079S0065	CCA1705S0017	CCA0836S0009	CCA0906S0044	CCA1277S0024
CCA1151S0072	CCA1530S0021	CCA0941S0073	CCA0986S0077	CCA0929S0005	CCA0991S0040	CCA1344S0011	CCA1079S0070	CCA1721S0011	CCA0836S0014	CCA0906S0070	CCA1277S0043
CCA1151S0077	CCA1530S0027	CCA0941S0074	CCA0986S0083	CCA0929S0013	CCA0991S0042	CCA1344S0013	CCA1079S0073	CCA1724S0009	CCA0836S0019	CCA0906S0078	CCA1277S0044
CCA1154S0003	CCA1530S0028	CCA0941S0075	CCA0989S0015	CCA0929S0027	CCA0991S0059	CCA1348S0014	CCA1079S0076	CCA1726S0002	CCA0836S0020	CCA0906S0079	CCA1277S0054
CCA1154S0033	CCA1531S0013	CCA0941S0076	CCA0989S0028	CCA0929S0036	CCA0991S0064	CCA1348S0015	CCA1079S0078	CCA1729S0001	CCA0836S0032	CCA0906S0088	CCA1277S0058
CCA1157S0005	CCA1531S0036	CCA0941S0077	CCA0989S0043	CCA0929S0037	CCA0991S0070	CCA1348S0030	CCA1082S0010	CCA1729S0002	CCA0836S0047	CCA0906S0092	CCA1277S0060
CCA1159S0006	CCA1533S0003	CCA0941S0093	CCA0990S0043	CCA0929S0042	CCA0993S0001	CCA1353S0006	CCA1082S0019	CCA1729S0005	CCA0836S0054	CCA0907S0015	CCA1278S0003
CCA1159S0015	CCA1538S0004	CCA0942S0003	CCA0991S0010	CCA0929S0084	CCA0998S0017	CCA1353S0022	CCA1082S0020	CCA1731S0003	CCA0836S0057	CCA0907S0048	CCA1278S0033
CCA1159S0028	CCA1539S0022	CCA0942S0025	CCA0991S0019	CCA0929S0092	CCA0998S0019	CCA1357S0005	CCA1082S0025	CCA1731S0016	CCA0836S0086	CCA0907S0054	CCA1279S0027
CCA1159S0033	CCA1539S0028	CCA0942S0043	CCA0991S0026	CCA0929S0099	CCA0998S0027	CCA1363S0013	CCA1082S0044	CCA1738S0041	CCA0836S0087	CCA0907S0059	CCA1280S0014
CCA1161S0019	CCA1539S0043	CCA0942S0051	CCA0991S0043	CCA0929S0100	CCA0998S0033	CCA1363S0023	CCA1082S0054	CCA1739S0020	CCA0836S0117	CCA0907S0074	CCA1285S0004
CCA1163S0006	CCA1539S0044	CCA0942S0082	CCA0991S0085	CCA0929S0102	CCA0998S0039	CCA1365S0019	CCA1084S0002	CCA1744S0001	CCA0836S0120	CCA0907S0080	CCA1285S0033
CCA1164S0015	CCA1539S0050	CCA0942S0086	CCA0991S0088	CCA0929S0113	CCA0998S0042	CCA1365S0030	CCA1084S0008	CCA1744S0002	CCA0838S0019	CCA0907S0082	CCA1287S0023
CCA1164S0020	CCA1540S0021	CCA0942S0087	CCA0994S0002	CCA0932S0009	CCA1000S0010	CCA1365S0038	CCA1084S0018	CCA1744S0003	CCA0838S0052	CCA0909S0019	CCA1287S0034
CCA1164S0033	CCA1542S0005	CCA0942S0090	CCA0998S0035	CCA0932S0030	CCA1002S0002	CCA1365S0039	CCA1084S0020	CCA1757S0004	CCA0838S0068	CCA0909S0021	CCA1287S0039
CCA1168S0011	CCA1543S0013	CCA0944S0010	CCA1000S0004	CCA0935S0051	CCA1002S0033	CCA1369S0017	CCA1084S0048	CCA1757S0010	CCA0838S0070	CCA0909S0035	CCA1287S0045
CCA1168S0024	CCA1543S0017	CCA0944S0014	CCA1002S0017	CCA0935S0056	CCA1002S0034	CCA1371S0018	CCA1085S0019	CCA1757S0011	CCA0838S0082	CCA0909S0043	CCA1287S0054
CCA1168S0030	CCA1544S0012	CCA0944S0028	CCA1002S0018	CCA0935S0069	CCA1002S0063	CCA1377S0030	CCA1085S0022	CCA1757S0016	CCA0839S0004	CCA0909S0045	CCA1287S0075
CCA1168S0036	CCA1544S0027	CCA0944S0033	CCA1002S0024	CCA0935S0080	CCA1005S0033	CCA1379S0003	CCA1085S0028	CCA1757S0018	CCA0839S0065	CCA0909S0057	CCA1287S0081
CCA1168S0041	CCA1545S0008	CCA0944S0060	CCA1002S0069	CCA0935S0086	CCA1005S0054	CCA1379S0008	CCA1085S0057	CCA1757S0020	CCA0839S0066	CCA0909S0067	CCA1287S0088
CCA1172S0030	CCA1545S0017	CCA0944S0062	CCA1002S0072	CCA0936S0033	CCA1008S0024	CCA1379S0010	CCA1089S0005	CCA1758S0004	CCA0839S0073	CCA0909S0071	CCA1288S0001
CCA1172S0031	CCA1545S0026	CCA0947S0009	CCA1005S0015	CCA0940S0026	CCA1013S0041	CCA1379S0013	CCA1089S0034	CCA1758S0006	CCA0839S0089	CCA0909S0073	CCA1288S0018
CCA1172S0032	CCA1545S0030	CCA0947S0011	CCA1005S0032	CCA0940S0050	CCA1013S0042	CCA1379S0014	CCA1089S0038	CCA1769S0020	CCA0839S0097	CCA0909S0079	CCA1291S0006
CCA1173S0022	CCA1546S0015	CCA0947S0014	CCA1005S0049	CCA0940S0054	CCA1013S0081	CCA1379S0019	CCA1089S0041	CCA1784S0001	CCA0839S0135	CCA0909S0081	CCA1294S0013
CCA1173S0026	CCA1547S0015	CCA0947S0025	CCA1005S0053	CCA0940S0058	CCA1015S0043	CCA1381S0021	CCA1094S0043	CCA1797S0006	CCA0839S0146	CCA0909S0096	CCA1296S0027
CCA1173S0038	CCA1547S0016	CCA0947S0030	CCA1008S0023	CCA0940S0059	CCA1015S0050	CCA1381S0025	CCA1094S0048	CCA1798S0001	CCA0839S0153	CCA0910S0001	CCA1298S0017
CCA1178S0008	CCA1549S0022	CCA0947S0053	CCA1008S0040	CCA0941S0028	CCA1015S0060	CCA1383S0001	CCA1094S0077	CCA1801S0003	CCA0842S0009	CCA0910S0010	CCA1299S0001
CCA1178S0009	CCA1549S0028	CCA0949S0063	CCA1009S0001	CCA0941S0033	CCA1015S0088	CCA1385S0003	CCA1094S0088	CCA1806S0001	CCA0843S0007	CCA0910S0021	CCA1300S0006
CCA1178S0011	CCA1549S0030	CCA0951S0044	CCA1013S0009	CCA0941S0034	CCA1015S0089	CCA1386S0002	CCA1094S0096	CCA1809S0003	CCA0843S0035	CCA0912S0018	CCA1300S0032
CCA1181S0014	CCA1550S0001	CCA0951S0046	CCA1013S0010	CCA0941S0044	CCA1015S0095	CCA1388S0024	CCA1094S0101	CCA1809S0004	CCA0843S0044	CCA0912S0021	CCA1300S0040
CCA1184S0004	CCA1550S0019	CCA0953S0031	CCA1013S0011	CCA0941S0050	CCA1015S0098	CCA1388S0033	CCA1094S0127	CCA1809S0012	CCA0843S0058	CCA0912S0027	CCA1302S0005
CCA1184S0019	CCA1550S0040	CCA0953S0054	CCA1013S0040	CCA0941S0071	CCA1015S0103	CCA1388S0041	CCA1094S0130	CCA1809S0013	CCA0843S0068	CCA0912S0035	CCA1310S0007
CCA1184S0043	CCA1551S0003	CCA0953S0065	CCA1013S0048	CCA0941S0080	CCA1015S0108	CCA1390S0014	CCA1095S0007	CCA1810S0010	CCA0843S0086	CCA0912S0054	CCA1312S0006
CCA1184S0044	CCA1552S0003	CCA0953S0067	CCA1013S0069	CCA0941S0081	CCA1015S0112	CCA1390S0032	CCA1095S0009	CCA1813S0010	CCA0843S0093	CCA0912S0057	CCA1312S0010
CCA1187S0007	CCA1552S0017	CCA0953S0076	CCA1013S0077	CCA0941S0085	CCA1016S0007	CCA1391S0036	CCA1095S0017		CCA0843S0099	CCA0912S0061	CCA1312S0011
CCA1187S0009	CCA1555S0014	CCA0953S0080	CCA1013S0089	CCA0941S0098	CCA1016S0013	CCA1391S0044	CCA1095S0087		CCA0844S0027	CCA0912S0062	CCA1312S0021
CCA1187S0018	CCA1557S0009	CCA0953S0085	CCA1013S0091	CCA0941S0105	CCA1016S0023	CCA1391S0061	CCA1097S0016		CCA0844S0031	CCA0912S0091	CCA1312S0030
CCA1187S0024	CCA1559S0031	CCA0953S0086	CCA1013S0094	CCA0941S0112	CCA1016S0040	CCA1392S0001	CCA1097S0019		CCA0846S0022	CCA0912S0092	CCA1322S0016
CCA1189S0001	CCA1563S0001	CCA0953S0088	CCA1015S0003	CCA0942S0001	CCA1017S0020	CCA1394S0023	CCA1097S0028		CCA0846S0033	CCA0912S0095	CCA1324S0012
CCA1189S0003	CCA1564S0012	CCA0953S0090	CCA1015S0004	CCA0942S0023	CCA1020S0015	CCA1397S0020	CCA1097S0046		CCA0846S0042	CCA0912S0104	CCA1324S0022
CCA1191S0029	CCA1564S0019	CCA0953S0093	CCA1015S0031	CCA0942S0027	CCA1022S0008	CCA1400S0024	CCA1097S0048		CCA0848S0004	CCA0914S0023	CCA1324S0024
CCA1194S0009	CCA1568S0014	CCA0953S0101	CCA1015S0033	CCA0942S0028	CCA1022S0013	CCA1402S0021	CCA1097S0061		CCA0848S0017	CCA0914S0026	CCA1324S0028
CCA1194S0048	CCA1570S0004	CCA0954S0010	CCA1015S0096	CCA0942S0035	CCA1022S0017	CCA1403S0025	CCA1097S0088		CCA0848S0055	CCA0914S0027	CCA1324S0043
CCA1197S0006	CCA1572S0004	CCA0954S0012	CCA1016S0039	CCA0942S0048	CCA1024S0002	CCA1406S0006	CCA1097S0093		CCA0848S0056	CCA0916S0005	CCA1326S0017
CCA1197S0013	CCA1573S0014	CCA0954S0033	CCA1020S0016	CCA0942S0085	CCA1024S0012	CCA1406S0019	CCA1099S0001		CCA0848S0061	CCA0916S0006	CCA1326S0024
CCA1198S0001	CCA1575S0028	CCA0954S0047	CCA1022S0004	CCA0942S0091	CCA1024S0016	CCA1407S0017	CCA1100S0010		CCA0848S0070	CCA0918S0002	CCA1326S0044
CCA1199S0002	CCA1578S0004	CCA0955S0001	CCA1024S0026	CCA0942S0093	CCA1027S0002	CCA1412S0017	CCA1100S0029		CCA0848S0075	CCA0918S0015	CCA1326S0048
CCA1199S0014	CCA1580S0002	CCA0957S0002	CCA1025S0004	CCA0942S0101	CCA1027S0003	CCA1413S0004	CCA1106S0008		CCA0849S0015	CCA0918S0018	CCA1327S0018
CCA1199S0025	CCA1581S0008	CCA0957S0021	CCA1025S0014	CCA0942S0104	CCA1027S0039	CCA1413S0016	CCA1106S0030		CCA0849S0041	CCA0918S0021	CCA1330S0003
CCA1199S0031	CCA1582S0009	CCA0958S0004	CCA1025S0019	CCA0944S0029	CCA1027S0059	CCA1420S0007	CCA1106S0031		CCA0849S0053	CCA0918S0022	CCA1330S0016
CCA1199S0059	CCA1584S0009	CCA0958S0008	CCA1027S0005	CCA0944S0032	CCA1027S0068	CCA1420S0013	CCA1106S0033		CCA0849S0082	CCA0918S0023	CCA1330S0043
CCA1199S0082	CCA1587S0007	CCA0958S0020	CCA1027S0012	CCA0944S0041	CCA1029S0030	CCA1420S0014	CCA1107S0033		CCA0851S0010	CCA0918S0054	CCA1343S0007
CCA1203S0021	CCA1587S0018	CCA0958S0026	CCA1027S0013	CCA0949S0009	CCA1031S0019	CCA1420S0018	CCA1107S0035		CCA0851S0056	CCA0918S0069	CCA1343S0025
CCA1203S0032	CCA1587S0029	CCA0961S0006	CCA1027S0038	CCA0949S0036	CCA1031S0036	CCA1425S0007	CCA1107S0036		CCA0851S0062	CCA0918S0111	CCA1343S0034
CCA1204S0020	CCA1587S0038	CCA0961S0009	CCA1027S0044	CCA0949S0040	CCA1033S0033	CCA1430S0008	CCA1108S0015		CCA0851S0068	CCA0918S0112	CCA1348S0005
CCA1209S0002	CCA1589S0009	CCA0961S0033	CCA1027S0060	CCA0951S0029	CCA1033S0051	CCA1430S0025	CCA1113S0011		CCA0851S0087	CCA0918S0119	CCA1350S0017
CCA1210S0012	CCA1589S0014	CCA0961S0042	CCA1029S0005	CCA0953S0022	CCA1034S0006	CCA1433S0022	CCA1115S0024		CCA0851S0105	CCA0918S0148	CCA1353S0003
CCA1212S0012	CCA1591S0016	CCA0961S0043	CCA1031S0028	CCA0954S0025	CCA1034S0015	CCA1441S0027	CCA1116S0001		CCA0851S0111	CCA0918S0150	CCA1353S0011
CCA1217S0025	CCA1591S0017	CCA0961S0052	CCA1033S0005	CCA0954S0044	CCA1034S0025	CCA1441S0028	CCA1118S0054		CCA0851S0149	CCA0918S0154	CCA1357S0011
CCA1217S0034	CCA1593S0012	CCA0961S0068	CCA1033S0032	CCA0954S0046	CCA1034S0037	CCA1445S0010	CCA1120S0035		CCA0851S0161	CCA0918S0178	CCA1359S0003
CCA1219S0013	CCA1593S0026	CCA0961S0073	CCA1034S0043	CCA0957S0029	CCA1034S0040	CCA1453S0031	CCA1120S0038		CCA0851S0185	CCA0918S0181	CCA1363S0016
CCA1219S0015	CCA1596S0006	CCA0961S0074	CCA1034S0048	CCA0957S0031	CCA1034S0053	CCA1453S0036	CCA1120S0040		CCA0851S0188	CCA0918S0192	CCA1363S0022
CCA1219S0017	CCA1597S0023	CCA0961S0089	CCA1034S0066	CCA0961S0013	CCA1034S0063	CCA1453S0046	CCA1120S0041		CCA0851S0208	CCA0918S0197	CCA1363S0065
CCA1219S0024	CCA1599S0001	CCA0961S0093	CCA1035S0009	CCA0961S0024	CCA1037S0018	CCA1453S0059	CCA1120S0043		CCA0852S0002	CCA0922S0049	CCA1365S0002
CCA1219S0027	CCA1599S0020	CCA0961S0096	CCA1035S0011	CCA0961S0025	CCA1039S0003	CCA1453S0065	CCA1120S0064		CCA0852S0012	CCA0923S0011	CCA1365S0032
CCA1219S0045	CCA1601S0005	CCA0961S0110	CCA1035S0019	CCA0961S0032	CCA1039S0006	CCA1456S0029	CCA1120S0066		CCA0852S0040	CCA0923S0047	CCA1365S0049
CCA1219S0053	CCA1601S0012	CCA0964S0022	CCA1037S0023	CCA0961S0046	CCA1039S0011	CCA1458S0004	CCA1120S0067		CCA0852S0048	CCA0923S0056	CCA1368S0018
CCA1219S0057	CCA1601S0021	CCA0964S0029	CCA1037S0024	CCA0961S0050	CCA1039S0023	CCA1458S0022	CCA1120S0076		CCA0852S0070	CCA0925S0015	CCA1370S0018
CCA1219S0059	CCA1601S0025	CCA0964S0035	CCA1037S0033	CCA0961S0066	CCA1039S0030	CCA1461S0014	CCA1123S0002		CCA0852S0094	CCA0925S0024	CCA1370S0025
CCA1219S0068	CCA1601S0031	CCA0964S0048	CCA1039S0022	CCA0961S0070	CCA1039S0031	CCA1462S0001	CCA1123S0006		CCA0853S0010	CCA0925S0040	CCA1377S0009
CCA1219S0080	CCA1601S0043	CCA0968S0026	CCA1039S0028	CCA0961S0071	CCA1039S0047	CCA1463S0005	CCA1123S0008		CCA0854S0006	CCA0925S0071	CCA1377S0014
CCA1219S0082	CCA1602S0012	CCA0968S0027	CCA1039S0044	CCA0961S0115	CCA1039S0052	CCA1479S0025	CCA1123S0010		CCA0854S0016	CCA0925S0090	CCA1377S0026
CCA1220S0015	CCA1602S0023	CCA0968S0035	CCA1039S0057	CCA0961S0130	CCA1039S0063	CCA1479S0039	CCA1123S0016		CCA0854S0029	CCA0929S0002	CCA1379S0023
CCA1221S0013	CCA1603S0004	CCA0968S0038	CCA1040S0003	CCA0964S0011	CCA1041S0018	CCA1479S0040	CCA1123S0017		CCA0854S0030	CCA0929S0004	CCA1379S0032
CCA1225S0001	CCA1606S0009	CCA0973S0020	CCA1041S0017	CCA0964S0030	CCA1041S0026	CCA1479S0043	CCA1123S0019		CCA0854S0043	CCA0929S0012	CCA1381S0004
CCA1228S0008	CCA1609S0003	CCA0975S0020	CCA1041S0025	CCA0964S0065	CCA1041S0049	CCA1480S0010	CCA1123S0050		CCA0854S0049	CCA0929S0019	CCA1382S0008
CCA1228S0013	CCA1609S0004	CCA0975S0030	CCA1041S0059	CCA0964S0068	CCA1041S0055	CCA1481S0002	CCA1123S0051		CCA0854S0073	CCA0929S0051	CCA1382S0021
CCA1228S0017	CCA1610S0003	CCA0977S0005	CCA1041S0079	CCA0968S0006	CCA1041S0083	CCA1481S0004	CCA1123S0063		CCA0854S0076	CCA0929S0098	CCA1384S0011
CCA1228S0037	CCA1610S0008	CCA0977S0013	CCA1045S0002	CCA0970S0019	CCA1041S0090	CCA1481S0006	CCA1123S0077		CCA0854S0090	CCA0929S0105	CCA1384S0021
CCA1228S0060	CCA1611S0001	CCA0977S0026	CCA1045S0018	CCA0973S0018	CCA1045S0001	CCA1483S0003	CCA1123S0078		CCA0854S0098	CCA0930S0001	CCA1388S0040
CCA1229S0004	CCA1612S0002	CCA0977S0031	CCA1045S0036	CCA0975S0005	CCA1045S0012	CCA1498S0013	CCA1123S0083		CCA0854S0107	CCA0932S0004	CCA1390S0006
CCA1231S0001	CCA1616S0012	CCA0979S0019	CCA1045S0052	CCA0975S0015	CCA1045S0017	CCA1498S0046	CCA1123S0092		CCA0854S0108	CCA0932S0026	CCA1390S0022
CCA1233S0001	CCA1616S0023	CCA0979S0037	CCA1046S0039	CCA0975S0054	CCA1045S0021	CCA1503S0009	CCA1126S0002		CCA0854S0117	CCA0932S0027	CCA1390S0023
CCA1233S0011	CCA1616S0030	CCA0982S0053	CCA1046S0058	CCA0975S0060	CCA1045S0028	CCA1503S0020	CCA1126S0020		CCA0857S0010	CCA0932S0028	CCA1390S0027
CCA1233S0012	CCA1621S0004	CCA0982S0055	CCA1046S0063	CCA0975S0075	CCA1045S0029	CCA1503S0038	CCA1126S0026		CCA0857S0011	CCA0932S0031	CCA1391S0020
CCA1235S0012	CCA1624S0014	CCA0982S0056	CCA1046S0079	CCA0975S0087	CCA1045S0049	CCA1505S0015	CCA1126S0027		CCA0857S0013	CCA0935S0019	CCA1391S0035
CCA1236S0015	CCA1624S0024	CCA0982S0061	CCA1046S0116	CCA0975S0100	CCA1046S0012	CCA1505S0018	CCA1126S0042		CCA0857S0018	CCA0935S0022	CCA1392S0010
CCA1244S0006	CCA1628S0002	CCA0982S0063	CCA1048S0010	CCA0975S0102	CCA1046S0020	CCA1505S0027	CCA1126S0046		CCA0857S0019	CCA0935S0037	CCA1394S0022
CCA1244S0011	CCA1635S0018	CCA0983S0007	CCA1048S0011	CCA0975S0109	CCA1046S0029	CCA1509S0002	CCA1126S0062		CCA0857S0034	CCA0935S0057	CCA1395S0001
CCA1247S0002	CCA1638S0021	CCA0983S0049	CCA1048S0022	CCA0975S0111	CCA1046S0030	CCA1511S0029	CCA1126S0078		CCA0857S0036	CCA0935S0058	CCA1402S0003
CCA1249S0006	CCA1656S0029	CCA0983S0052	CCA1051S0001	CCA0977S0007	CCA1046S0033	CCA1517S0001	CCA1126S0080		CCA0857S0037	CCA0935S0085	CCA1402S0004
CCA1250S0002	CCA1659S0003	CCA0983S0064	CCA1051S0034	CCA0977S0036	CCA1046S0040	CCA1524S0020	CCA1130S0016		CCA0857S0050	CCA0936S0009	CCA1406S0021
CCA1250S0005	CCA1661S0004	CCA0983S0065	CCA1052S0001	CCA0977S0052	CCA1046S0053	CCA1524S0021	CCA1130S0024		CCA0857S0051	CCA0936S0010	CCA1407S0012
[truncated: 1,412 more rows]
