# Supplementary material for: Global Transcriptome Analysis Revealed the Molecular Regulation Mechanism of Pigment and Reactive Oxygen Species Metabolism During the Stigma Development of Carya cathayensis
Source: Front Plant Sci. 2022 May 9;13:881394. doi: 10.3389/fpls.2022.881394 (PMC9125253; doi:10.3389/fpls.2022.881394)
Supplement: Supplementary file 5 [file Table_4.XLSX]

## Sheet: Sheet1
Supplementary table 4 KEGG pathway enrichment analysis of 12 clusters
Cluster	ID	Description	GeneRatio	BgRatio	pvalue	p.adjust	qvalue	geneID	Count
cluster_3	ko00770	Pantothenate and CoA biosynthesis	19/1109	96/14164	0.000139168	0.0153084	0.0142097	BGI_novel_G000953/BGI_novel_G001307/BGI_novel_G001863/CCA0500S0235/CCA0505S0341/CCA0555S0082/CCA0576S0225/CCA0578S0149/CCA0595S0013/CCA0680S0024/CCA0718S0055/CCA0736S0041/CCA0754S0159/CCA0975S0020/CCA0984S0070/CCA1250S0044/CCA1430S0007/CCA1479S0055/CCA1738S0013	19
cluster_3	ko00310	Lysine degradation	16/1109	83/14164	0.000621047	0.0341576	0.0317061	CCA0500S0165/CCA0539S0239/CCA0576S0222/CCA0597S0175/CCA0601S0101/CCA0646S0083/CCA0662S0156/CCA0694S0072/CCA0789S0130/CCA0799S0036/CCA0829S0062/CCA0838S0043/CCA1027S0062/CCA1057S0080/CCA1178S0026/CCA1324S0014	16
cluster_3	ko00290	Valine, leucine and isoleucine biosynthesis	12/1109	55/14164	0.00093489	0.0342793	0.0318191	CCA0500S0235/CCA0505S0341/CCA0576S0225/CCA0595S0013/CCA0680S0024/CCA0754S0036/CCA0754S0159/CCA0975S0020/CCA0984S0070/CCA1250S0044/CCA1430S0007/CCA1738S0013	12
cluster_3	ko03015	mRNA surveillance pathway	52/1109	438/14164	0.00164361	0.0451992	0.0419553	BGI_novel_G000302/BGI_novel_G000346/BGI_novel_G000459/BGI_novel_G001456/BGI_novel_G001849/CCA0103S0004/CCA0507S0164/CCA0507S0179/CCA0514S0216/CCA0520S0109/CCA0525S0218/CCA0539S0229/CCA0546S0308/CCA0549S0157/CCA0566S0016/CCA0587S0005/CCA0589S0097/CCA0605S0031/CCA0652S0127/CCA0656S0049/CCA0696S0070/CCA0701S0032/CCA0762S0021/CCA0789S0042/CCA0816S0011/CCA0819S0063/CCA0851S0066/CCA0907S0050/CCA0924S00…	52
cluster_5	ko00196	Photosynthesis - antenna proteins	16/1216	33/14164	2.26279e-09	2.55695e-07	2.38188e-07	BGI_novel_G000546/BGI_novel_G000786/CCA0063S0003/CCA0542S0008/CCA0576S0072/CCA0616S0169/CCA0616S0171/CCA0642S0057/CCA0646S0117/CCA0961S0024/CCA1015S0047/CCA1118S0063/CCA1463S0001/CCA1463S0003/CCA1524S0013/CCA1573S0013	16
cluster_5	ko03050	Proteasome	28/1216	152/14164	8.69539e-05	0.00333739	0.00310889	BGI_novel_G000009/BGI_novel_G002882/CCA0413S0001/CCA0500S0232/CCA0500S0289/CCA0513S0052/CCA0513S0210/CCA0522S0078/CCA0526S0244/CCA0546S0292/CCA0587S0210/CCA0589S0130/CCA0601S0025/CCA0623S0009/CCA0679S0152/CCA0694S0067/CCA0694S0103/CCA0784S0095/CCA0791S0071/CCA0898S0094/CCA0905S0005/CCA0912S0070/CCA1017S0011/CCA1228S0057/CCA1277S0069/CCA1479S0020/CCA1686S0026/CCA1731S0011	28
cluster_5	ko03030	DNA replication	29/1216	160/14164	8.86032e-05	0.00333739	0.00310889	BGI_novel_G000942/CCA0203S0003/CCA0513S0323/CCA0524S0308/CCA0566S0113/CCA0582S0135/CCA0616S0143/CCA0616S0149/CCA0651S0001/CCA0654S0034/CCA0654S0080/CCA0674S0038/CCA0704S0075/CCA0748S0004/CCA0774S0035/CCA0833S0001/CCA0838S0027/CCA0851S0026/CCA0862S0040/CCA0862S0137/CCA0904S0211/CCA0906S0085/CCA0909S0017/CCA1002S0098/CCA1051S0004/CCA1147S0057/CCA1483S0001/CCA1487S0001/CCA1653S0004	29
cluster_5	ko00860	Porphyrin and chlorophyll metabolism	21/1216	108/14164	0.000298748	0.00843962	0.00786178	BGI_novel_G000041/CCA0006S0002/CCA0082S0003/CCA0108S0005/CCA0632S0071/CCA0633S0102/CCA0634S0047/CCA0694S0099/CCA0700S0013/CCA0862S0116/CCA0929S0084/CCA0942S0027/CCA0942S0028/CCA0942S0035/CCA0975S0060/CCA0979S0015/CCA1134S0014/CCA1377S0020/CCA1391S0011/CCA1573S0024/CCA1692S0010	21
cluster_5	ko00300	Lysine biosynthesis	8/1216	25/14164	0.000826961	0.0186893	0.0174097	BGI_novel_G002409/CCA0505S0308/CCA0505S0331/CCA0514S0283/CCA0601S0122/CCA0698S0051/CCA1279S0030/CCA1279S0031	8
cluster_5	ko00710	Carbon fixation in photosynthetic organisms	26/1216	165/14164	0.00178046	0.033532	0.0312361	BGI_novel_G000026/BGI_novel_G000353/BGI_novel_G001625/CCA0176S0001/CCA0500S0243/CCA0505S0267/CCA0507S0177/CCA0510S0132/CCA0526S0142/CCA0539S0019/CCA0576S0219/CCA0576S0242/CCA0589S0149/CCA0589S0234/CCA0601S0050/CCA0718S0081/CCA0799S0015/CCA0884S0102/CCA1071S0022/CCA1079S0068/CCA1126S0038/CCA1363S0042/CCA1412S0016/CCA1615S0004/CCA1672S0004/CCA1753S0001	26
cluster_5	ko00195	Photosynthesis	16/1216	88/14164	0.00308935	0.0498709	0.0464564	CCA0552S0280/CCA0576S0057/CCA0597S0020/CCA0694S0076/CCA0765S0059/CCA0851S0100/CCA0854S0034/CCA0898S0008/CCA0904S0183/CCA0907S0053/CCA1005S0040/CCA1041S0063/CCA1084S0003/CCA1219S0071/CCA1324S0030/CCA1681S0007	16
cluster_6	ko04136	Autophagy - other	23/1048	75/14164	2.21847e-09	2.57343e-07	2.40529e-07	CCA0505S0104/CCA0507S0226/CCA0552S0188/CCA0576S0233/CCA0688S0044/CCA0700S0091/CCA0718S0125/CCA0736S0047/CCA0737S0037/CCA0806S0015/CCA0819S0014/CCA0836S0058/CCA0848S0109/CCA0854S0057/CCA0862S0018/CCA0925S0084/CCA0986S0044/CCA1048S0030/CCA1073S0006/CCA1074S0051/CCA1219S0061/CCA1247S0021/CCA1704S0016	23
cluster_6	ko00966	Glucosinolate biosynthesis	8/1048	24/14164	0.000220316	0.0127783	0.0119435	BGI_novel_G000778/BGI_novel_G000875/BGI_novel_G002092/BGI_novel_G002506/BGI_novel_G002891/CCA0582S0004/CCA0662S0036/CCA1789S0004	8
cluster_8	ko03050	Proteasome	30/1172	152/14164	6.03385e-06	0.000669757	0.000635142	BGI_novel_G000485/BGI_novel_G000711/CCA0500S0105/CCA0539S0013/CCA0542S0082/CCA0546S0099/CCA0566S0105/CCA0638S0012/CCA0659S0158/CCA0686S0022/CCA0691S0017/CCA0704S0139/CCA0754S0110/CCA0754S0161/CCA0779S0206/CCA0784S0032/CCA0789S0098/CCA0822S0020/CCA0822S0021/CCA0839S0170/CCA0918S0010/CCA0918S0139/CCA1095S0087/CCA1126S0046/CCA1187S0020/CCA1221S0033/CCA1261S0042/CCA1278S0035/CCA1287S0083/CCA1312S0022	30
cluster_8	ko00195	Photosynthesis	18/1172	88/14164	0.000265651	0.0147436	0.0139816	BGI_novel_G001542/CCA0383S0001/CCA0525S0162/CCA0542S0101/CCA0546S0235/CCA0546S0237/CCA0616S0046/CCA0627S0061/CCA0652S0084/CCA0803S0018/CCA0806S0139/CCA0961S0017/CCA1046S0078/CCA1126S0080/CCA1365S0028/CCA1377S0025/CCA1596S0022/CCA1731S0012	18
cluster_8	ko00970	Aminoacyl-tRNA biosynthesis	26/1172	168/14164	0.00137502	0.0441411	0.0418597	CCA0505S0106/CCA0539S0046/CCA0555S0227/CCA0591S0139/CCA0598S0121/CCA0601S0121/CCA0633S0110/CCA0659S0109/CCA0670S0024/CCA0686S0070/CCA0701S0072/CCA0757S0030/CCA0789S0023/CCA0849S0036/CCA0849S0037/CCA0886S0054/CCA0940S0030/CCA0982S0060/CCA1051S0061/CCA1052S0022/CCA1079S0070/CCA1079S0078/CCA1138S0016/CCA1324S0052/CCA1343S0018/CCA1615S0001	26
cluster_8	ko00260	Glycine, serine and threonine metabolism	22/1172	135/14164	0.00159067	0.0441411	0.0418597	CCA0007S0002/CCA0522S0055/CCA0525S0131/CCA0552S0241/CCA0589S0101/CCA0595S0073/CCA0601S0121/CCA0642S0030/CCA0674S0067/CCA0688S0029/CCA0708S0058/CCA0762S0020/CCA0782S0080/CCA0851S0039/CCA1046S0086/CCA1048S0055/CCA1250S0077/CCA1252S0013/CCA1308S0005/CCA1308S0006/CCA1365S0041/CCA1524S0057	22
cluster_10	ko00450	Selenocompound metabolism	20/1428	72/14164	1.88884e-05	0.00215328	0.00196837	BGI_novel_G000135/BGI_novel_G000136/BGI_novel_G000571/BGI_novel_G000771/BGI_novel_G000772/BGI_novel_G000773/BGI_novel_G002844/BGI_novel_G002923/CCA0206S0002/CCA0507S0252/CCA0507S0253/CCA0507S0254/CCA0549S0147/CCA0633S0091/CCA0659S0034/CCA0892S0007/CCA0904S0029/CCA0918S0100/CCA1134S0015/CCA1310S0001	20
cluster_10	ko00941	Flavonoid biosynthesis	35/1428	185/14164	0.000183339	0.0104503	0.00955294	CCA0505S0080/CCA0524S0150/CCA0526S0158/CCA0529S0023/CCA0529S0026/CCA0607S0027/CCA0654S0054/CCA0662S0078/CCA0662S0086/CCA0670S0080/CCA0691S0117/CCA0709S0106/CCA0718S0030/CCA0718S0031/CCA0729S0052/CCA0743S0002/CCA0743S0010/CCA0743S0020/CCA0822S0057/CCA0828S0048/CCA0836S0020/CCA0859S0020/CCA0870S0041/CCA0879S0008/CCA0879S0009/CCA0892S0037/CCA0905S0011/CCA0929S0063/CCA1017S0001/CCA1026S0001/CCA1034S0…	35
cluster_10	ko00945	Stilbenoid, diarylheptanoid and gingerol biosynthesis	18/1428	75/14164	0.000369328	0.0122744	0.0112204	BGI_novel_G000016/CCA0524S0150/CCA0529S0023/CCA0529S0026/CCA0670S0080/CCA0691S0117/CCA0743S0002/CCA0743S0010/CCA0743S0020/CCA0828S0048/CCA0905S0011/CCA0929S0063/CCA1017S0001/CCA1026S0001/CCA1034S0031/CCA1073S0053/CCA1287S0049/CCA1294S0010	18
cluster_10	ko00380	Tryptophan metabolism	30/1428	157/14164	0.000430682	0.0122744	0.0112204	BGI_novel_G000242/BGI_novel_G000243/BGI_novel_G000244/BGI_novel_G002671/CCA0422S0001/CCA0522S0093/CCA0522S0206/CCA0539S0162/CCA0539S0164/CCA0546S0247/CCA0549S0029/CCA0616S0075/CCA0656S0062/CCA0781S0008/CCA0897S0181/CCA0944S0025/CCA1034S0022/CCA1048S0012/CCA1095S0055/CCA1095S0057/CCA1277S0072/CCA1542S0009/CCA1542S0010/CCA1548S0003/CCA1548S0004/CCA1616S0019/CCA1625S0002/CCA1707S0001/CCA1707S0011/CC…	30
cluster_10	ko00040	Pentose and glucuronate interconversions	55/1428	354/14164	0.000753313	0.0171755	0.0157006	BGI_novel_G000308/BGI_novel_G001018/BGI_novel_G002270/BGI_novel_G002271/BGI_novel_G002782/CCA0500S0137/CCA0520S0085/CCA0520S0223/CCA0526S0036/CCA0526S0299/CCA0526S0336/CCA0526S0344/CCA0549S0148/CCA0568S0002/CCA0568S0003/CCA0578S0085/CCA0601S0057/CCA0620S0042/CCA0633S0109/CCA0634S0080/CCA0634S0087/CCA0646S0133/CCA0646S0135/CCA0649S0059/CCA0659S0119/CCA0674S0091/CCA0681S0095/CCA0688S0021/CCA0691S00…	55
cluster_10	ko00511	Other glycan degradation	31/1428	174/14164	0.00118666	0.0225466	0.0206104	BGI_novel_G000435/BGI_novel_G001201/BGI_novel_G001343/BGI_novel_G001469/BGI_novel_G002568/CCA0039S0014/CCA0500S0255/CCA0514S0124/CCA0522S0044/CCA0555S0257/CCA0559S0036/CCA0578S0014/CCA0634S0046/CCA0665S0052/CCA0737S0080/CCA0754S0137/CCA0857S0036/CCA0887S0051/CCA0898S0090/CCA0905S0070/CCA0906S0020/CCA0923S0059/CCA0923S0062/CCA1008S0022/CCA1013S0055/CCA1063S0036/CCA1151S0069/CCA1187S0011/CCA1301S00…	31
cluster_11	ko03030	DNA replication	34/1189	160/14164	3.4097e-07	3.95525e-05	3.80451e-05	BGI_novel_G000317/CCA0133S0005/CCA0507S0084/CCA0513S0009/CCA0513S0026/CCA0513S0069/CCA0514S0110/CCA0524S0033/CCA0525S0126/CCA0526S0138/CCA0552S0225/CCA0573S0026/CCA0613S0027/CCA0662S0129/CCA0665S0001/CCA0686S0094/CCA0704S0135/CCA0705S0041/CCA0786S0021/CCA0791S0049/CCA0791S0055/CCA0803S0108/CCA0848S0011/CCA0907S0080/CCA0909S0019/CCA0936S0072/CCA0983S0027/CCA1033S0027/CCA1279S0005/CCA1363S0004/CCA1…	34
cluster_11	ko00944	Flavone and flavonol biosynthesis	13/1189	45/14164	5.50074e-05	0.00289683	0.00278643	BGI_novel_G002005/BGI_novel_G002043/BGI_novel_G002064/BGI_novel_G002065/BGI_novel_G002066/BGI_novel_G002159/CCA0555S0045/CCA0616S0144/CCA0616S0145/CCA0859S0053/CCA0879S0073/CCA1151S0040/CCA1326S0050	13
cluster_11	ko03440	Homologous recombination	29/1189	162/14164	7.49181e-05	0.00289683	0.00278643	CCA0101S0003/CCA0507S0084/CCA0514S0110/CCA0524S0033/CCA0552S0225/CCA0589S0150/CCA0670S0055/CCA0686S0094/CCA0705S0041/CCA0786S0021/CCA0838S0046/CCA0848S0011/CCA0870S0049/CCA0891S0003/CCA0899S0004/CCA0936S0072/CCA0953S0070/CCA0983S0027/CCA1089S0020/CCA1089S0022/CCA1250S0097/CCA1298S0018/CCA1324S0004/CCA1498S0021/CCA1530S0024/CCA1578S0005/CCA1653S0001/CCA1681S0006/CCA1731S0021	29
cluster_11	ko03420	Nucleotide excision repair	29/1189	178/14164	0.000401668	0.00951824	0.00915548	CCA0507S0084/CCA0514S0110/CCA0524S0033/CCA0525S0126/CCA0535S0097/CCA0552S0225/CCA0573S0026/CCA0613S0027/CCA0665S0001/CCA0704S0135/CCA0705S0041/CCA0786S0021/CCA0791S0049/CCA0791S0055/CCA0803S0108/CCA0806S0116/CCA0848S0011/CCA0848S0102/CCA0907S0082/CCA0936S0072/CCA0983S0027/CCA1033S0027/CCA1039S0002/CCA1363S0004/CCA1523S0001/CCA1526S0012/CCA1530S0024/CCA1572S0001/CCA1681S0006	29
cluster_11	ko00943	Isoflavonoid biosynthesis	13/1189	54/14164	0.000410269	0.00951824	0.00915548	BGI_novel_G001697/BGI_novel_G001702/BGI_novel_G002005/BGI_novel_G002064/BGI_novel_G002065/BGI_novel_G002066/CCA0552S0055/CCA0552S0063/CCA0552S0064/CCA0859S0053/CCA0884S0058/CCA1123S0093/CCA1126S0058	13
cluster_11	ko03410	Base excision repair	22/1189	124/14164	0.000601656	0.011632	0.0111887	BGI_novel_G000585/BGI_novel_G000586/BGI_novel_G001375/CCA0514S0110/CCA0524S0033/CCA0526S0034/CCA0542S0007/CCA0552S0225/CCA0555S0229/CCA0613S0027/CCA0665S0001/CCA0701S0151/CCA0705S0041/CCA0733S0038/CCA0786S0021/CCA0803S0108/CCA0859S0123/CCA0983S0027/CCA1257S0009/CCA1530S0024/CCA1572S0001/CCA1681S0006	22
cluster_12	ko00190	Oxidative phosphorylation	32/914	254/14164	0.000213217	0.0236671	0.0228928	BGI_novel_G000444/BGI_novel_G000630/BGI_novel_G000821/CCA0502S0079/CCA0505S0033/CCA0513S0290/CCA0539S0028/CCA0552S0194/CCA0589S0034/CCA0598S0093/CCA0601S0053/CCA0607S0008/CCA0659S0214/CCA0669S0011/CCA0704S0092/CCA0705S0054/CCA0711S0040/CCA0765S0033/CCA0799S0069/CCA0888S0044/CCA0904S0018/CCA0909S0041/CCA0975S0049/CCA1051S0043/CCA1060S0013/CCA1217S0024/CCA1377S0014/CCA1420S0006/CCA1502S0001/CCA1541…	32
