# Supplementary material for: Global Transcriptome Analysis Revealed the Molecular Regulation Mechanism of Pigment and Reactive Oxygen Species Metabolism During the Stigma Development of Carya cathayensis
Source: Front Plant Sci. 2022 May 9;13:881394. doi: 10.3389/fpls.2022.881394 (PMC9125253; doi:10.3389/fpls.2022.881394)
Supplement: Supplementary file 6 [file Table_5.XLSX]

## Sheet: Sheet1
Supplementary table 5 KEGG pathway enrichment analysis of the DEGs genes
Category	Numbers	Cluster	ID	Description	GeneRatio	BgRatio	pvalue	p.adjust	qvalue	geneID	Count
Total	1	FS3_vs_FS2	ko00196	Photosynthesis - antenna proteins	10/1146	33/14164	0.00019033	0.0211267	0.0210365	BGI_novel_G000546/CCA0063S0003/CCA0507S0127/CCA0616S0169/CCA0616S0171/CCA0642S0057/CCA0646S0117/CCA1463S0001/CCA1463S0003/CCA1573S0013	10
Total	2	FS4_vs_FS3	ko00941	Flavonoid biosynthesis	46/2164	185/14164	0.000426293	0.0329851	0.0311902	BGI_novel_G001030/BGI_novel_G002419/CCA0006S0007/CCA0507S0248/CCA0507S0250/CCA0524S0150/CCA0526S0158/CCA0529S0026/CCA0542S0025/CCA0546S0049/CCA0555S0015/CCA0559S0120/CCA0559S0122/CCA0589S0069/CCA0607S0027/CCA0654S0054/CCA0662S0076/CCA0662S0078/CCA0662S0086/CCA0670S0080/CCA0676S0075/CCA0678S0067/CCA0691S0117/CCA0718S0030/CCA0718S0031/CCA0743S0007/CCA0743S0008/CCA0743S0009/CCA0743S0010/CCA0743S0020…	46
Total	3	FS4_vs_FS3	ko00945	Stilbenoid, diarylheptanoid and gingerol biosynthesis	23/2164	75/14164	0.000569661	0.0329851	0.0311902	BGI_novel_G000016/BGI_novel_G001030/CCA0524S0150/CCA0529S0026/CCA0546S0049/CCA0589S0069/CCA0670S0080/CCA0679S0012/CCA0691S0117/CCA0743S0007/CCA0743S0008/CCA0743S0009/CCA0743S0010/CCA0743S0020/CCA0828S0048/CCA0905S0011/CCA0929S0063/CCA0982S0053/CCA1017S0001/CCA1097S0009/CCA1287S0069/CCA1294S0002/CCA1412S0018	23
Total	4	FS4_vs_FS3	ko02010	ABC transporters	56/2164	243/14164	0.000838604	0.0329851	0.0311902	BGI_novel_G000400/BGI_novel_G000459/BGI_novel_G001062/BGI_novel_G001451/BGI_novel_G001735/BGI_novel_G002132/BGI_novel_G002133/BGI_novel_G002134/BGI_novel_G002143/BGI_novel_G002144/BGI_novel_G002145/BGI_novel_G002149/BGI_novel_G002150/BGI_novel_G002152/BGI_novel_G002776/CCA0016S0001/CCA0016S0007/CCA0520S0008/CCA0520S0009/CCA0522S0137/CCA0555S0015/CCA0576S0227/CCA0595S0080/CCA0623S0067/CCA0632S0057…	56
Total	5	FS3_vs_FS1	ko00196	Photosynthesis - antenna proteins	15/2050	33/14164	1.90235e-05	0.00222575	0.0019424	BGI_novel_G000546/BGI_novel_G000786/CCA0063S0003/CCA0507S0127/CCA0542S0008/CCA0616S0169/CCA0616S0171/CCA0642S0057/CCA0646S0117/CCA0961S0024/CCA1287S0052/CCA1463S0001/CCA1463S0003/CCA1524S0013/CCA1573S0013	15
Total	6	FS3_vs_FS1	ko03030	DNA replication	39/2050	160/14164	0.000587437	0.0248898	0.0217212	BGI_novel_G000317/CCA0133S0006/CCA0507S0084/CCA0513S0009/CCA0513S0069/CCA0513S0323/CCA0514S0110/CCA0524S0308/CCA0526S0138/CCA0582S0135/CCA0589S0219/CCA0616S0149/CCA0620S0020/CCA0654S0034/CCA0654S0080/CCA0662S0129/CCA0704S0135/CCA0705S0041/CCA0748S0004/CCA0774S0035/CCA0784S0046/CCA0791S0049/CCA0791S0055/CCA0803S0108/CCA0838S0027/CCA0851S0026/CCA0881S0056/CCA0904S0211/CCA0906S0085/CCA0907S0080/CCA0…	39
Total	7	FS3_vs_FS1	ko00942	Anthocyanin biosynthesis	9/2050	19/14164	0.0006382	0.0248898	0.0217212	BGI_novel_G002005/BGI_novel_G002064/BGI_novel_G002065/BGI_novel_G002158/BGI_novel_G002159/CCA0844S0041/CCA0859S0053/CCA0879S0073/CCA1220S0025	9
Total	8	FS4_vs_FS1	ko00196	Photosynthesis - antenna proteins	18/3080	33/14164	3.8463e-05	0.00453864	0.00408923	BGI_novel_G000546/BGI_novel_G000786/CCA0063S0003/CCA0507S0127/CCA0542S0008/CCA0583S0066/CCA0616S0169/CCA0616S0171/CCA0642S0057/CCA0646S0117/CCA0961S0024/CCA1015S0047/CCA1118S0063/CCA1225S0031/CCA1463S0001/CCA1463S0003/CCA1524S0013/CCA1573S0013	18
Total	9	FS4_vs_FS1	ko00195	Photosynthesis	34/3080	88/14164	0.000233556	0.0137798	0.0124153	CCA0065S0006/CCA0337S0001/CCA0373S0001/CCA0373S0002/CCA0383S0001/CCA0525S0162/CCA0546S0235/CCA0546S0237/CCA0552S0280/CCA0576S0057/CCA0597S0020/CCA0616S0046/CCA0688S0046/CCA0694S0076/CCA0765S0059/CCA0803S0018/CCA0806S0139/CCA0839S0088/CCA0851S0100/CCA0854S0034/CCA0898S0008/CCA0904S0183/CCA0907S0053/CCA1005S0040/CCA1084S0003/CCA1126S0080/CCA1199S0011/CCA1219S0054/CCA1219S0071/CCA1324S0030/CCA1377S0…	34
Total	10	FS4_vs_FS1	ko00943	Isoflavonoid biosynthesis	22/3080	54/14164	0.0012569	0.035881	0.0323281	BGI_novel_G000132/BGI_novel_G001702/BGI_novel_G001704/BGI_novel_G002005/BGI_novel_G002064/BGI_novel_G002065/BGI_novel_G002066/CCA0546S0103/CCA0552S0027/CCA0552S0054/CCA0552S0055/CCA0552S0057/CCA0552S0063/CCA0552S0064/CCA0800S0060/CCA0859S0053/CCA0986S0037/CCA0986S0080/CCA0986S0081/CCA0986S0082/CCA1123S0093/CCA1173S0004	22
Total	11	FS4_vs_FS1	ko00941	Flavonoid biosynthesis	58/3080	185/14164	0.00142932	0.035881	0.0323281	BGI_novel_G001030/BGI_novel_G001812/BGI_novel_G002617/CCA0006S0007/CCA0507S0050/CCA0507S0248/CCA0507S0250/CCA0524S0150/CCA0526S0158/CCA0529S0026/CCA0542S0025/CCA0546S0049/CCA0546S0103/CCA0559S0118/CCA0559S0149/CCA0587S0097/CCA0589S0069/CCA0607S0027/CCA0638S0198/CCA0646S0014/CCA0659S0035/CCA0662S0078/CCA0662S0083/CCA0662S0086/CCA0670S0080/CCA0676S0075/CCA0678S0167/CCA0680S0065/CCA0691S0117/CCA0709…	58
Total	12	FS4_vs_FS1	ko00511	Other glycan degradation	55/3080	174/14164	0.00152038	0.035881	0.0323281	BGI_novel_G000435/BGI_novel_G001092/BGI_novel_G001199/BGI_novel_G001200/BGI_novel_G001201/BGI_novel_G001343/BGI_novel_G001469/BGI_novel_G002568/CCA0500S0253/CCA0500S0254/CCA0500S0255/CCA0507S0162/CCA0522S0044/CCA0539S0121/CCA0539S0125/CCA0539S0148/CCA0555S0257/CCA0559S0036/CCA0559S0038/CCA0568S0029/CCA0601S0005/CCA0627S0027/CCA0627S0032/CCA0634S0046/CCA0638S0195/CCA0659S0166/CCA0665S0052/CCA0709S…	55
Total	13	FS4_vs_FS1	ko00906	Carotenoid biosynthesis	49/3080	155/14164	0.00265171	0.0483729	0.0435831	BGI_novel_G000261/BGI_novel_G000414/BGI_novel_G000915/BGI_novel_G000917/BGI_novel_G001297/BGI_novel_G001459/BGI_novel_G001460/BGI_novel_G001462/BGI_novel_G001467/BGI_novel_G001640/CCA0516S0018/CCA0522S0069/CCA0522S0071/CCA0522S0080/CCA0524S0072/CCA0559S0142/CCA0565S0032/CCA0597S0058/CCA0597S0081/CCA0597S0200/CCA0616S0065/CCA0642S0049/CCA0670S0086/CCA0670S0087/CCA0774S0022/CCA0789S0066/CCA0813S003…	49
Total	14	FS4_vs_FS1	ko00942	Anthocyanin biosynthesis	10/3080	19/14164	0.00304827	0.0483729	0.0435831	BGI_novel_G002005/BGI_novel_G002064/BGI_novel_G002065/BGI_novel_G002158/CCA0718S0065/CCA0844S0041/CCA0859S0053/CCA0879S0073/CCA1173S0004/CCA1220S0025	10
Total	15	FS4_vs_FS1	ko00945	Stilbenoid, diarylheptanoid and gingerol biosynthesis	27/3080	75/14164	0.00327952	0.0483729	0.0435831	BGI_novel_G000016/BGI_novel_G001030/CCA0524S0150/CCA0529S0026/CCA0546S0049/CCA0589S0069/CCA0670S0080/CCA0679S0009/CCA0679S0012/CCA0691S0117/CCA0709S0057/CCA0743S0007/CCA0743S0008/CCA0743S0009/CCA0743S0010/CCA0743S0020/CCA0828S0048/CCA0851S0015/CCA0929S0063/CCA0982S0053/CCA1017S0001/CCA1073S0053/CCA1097S0009/CCA1287S0069/CCA1294S0002/CCA1294S0010/CCA1412S0018	27
