# Supplementary material for: Global Transcriptome Analysis Revealed the Molecular Regulation Mechanism of Pigment and Reactive Oxygen Species Metabolism During the Stigma Development of Carya cathayensis
Source: Front Plant Sci. 2022 May 9;13:881394. doi: 10.3389/fpls.2022.881394 (PMC9125253; doi:10.3389/fpls.2022.881394)
Supplement: Supplementary file 7 [file Table_6.XLSX]

## Sheet: Sheet1
Supplementary table 6 Identification of pigment-Related Genes in the developing hickory stigma
Category	Gene Name	Gene ID	Decription	FLS1 FPKM	FLS2 FPKM	FLS3 FPKM	FLS4 FPKM
Anthocyanin	4CL1/5	CCA1526S0019	4-coumarate CoA ligase 4	43.3433	68.7833	44.6467	144.38
Anthocyanin	4CL2	CCA0662S0022	4-coumarate CoA ligase 4	10.6667	6.87667	4.71667	25.6933
Anthocyanin	4CL3	CCA1113S0014	4-coumarate CoA ligase 4	221.433	255.32	142.66	429.78
Anthocyanin	4CL8	CCA0765S0035	4-coumarate CoA ligase 4	54.02	170.44	266.717	151.073
Anthocyanin	AHA10	CCA0500S0229	H+-APTase	291.943	160.433	118.347	43.55
Anthocyanin	ANS（LDOX/TT18)	CCA0533S0160	anthocyanidin synthase	1168.97	1182.35	1251.74	1410.85
Anthocyanin	C4H	CCA0524S0150	cinnamate-4-hydroxylase	296.253	230.973	253.007	1098.62
Anthocyanin	CHI1/2 (TT5)	CCA1015S0108	chalcone isomerase	127.117	65.5867	151.173	135.137
Anthocyanin	CHS（TT4）	CCA1379S0019	chalcone synthase	318.257	225.313	263.23	365.62
Anthocyanin	DFR	CCA1250S0039	dihydroflavonol-4-reductase	48.49	42.7967	57.3633	62.2933
Anthocyanin	DFR(TT3)	CCA1620S0012	dihydroflavonol-4-reductase	268.73	200.74	241.21	171.897
Anthocyanin	F3'5'H	CCA0795S0041	flavonoid 3'5' hydroxylase	891.613	1279.76	1334.32	1516.66
Anthocyanin	F3H(TT6)	CCA0705S0076	flavanone-3-hydroxylase	2178.9	1854.88	2314.67	3077.16
Anthocyanin	F3'H(TT7)	CCA0507S0050	flavonoid 3' hydroxylase activity	633.403	820.203	1062.54	1599.44
Anthocyanin	FLS1/2/3/4/6	CCA0638S0198	flavonol synthase	2.26	0.68	0.75	0.21
Anthocyanin	FLS5	CCA0006S0007	flavonol synthase	337.717	190.25	211.93	8.71333
Anthocyanin	GL3/EGL3	CCA0623S0122	bHLH	4.96	3.78667	7.08	3.95
Anthocyanin	MRP1/2	CCA1731S0009	MRPs（MULTIDRUG RESISTANCE PROTEIN 1）	64.3533	66.5567	86.8333	67.6267
Anthocyanin	MRP3	CCA0646S0175	MRPs（MULTIDRUG RESISTANCE PROTEIN 3）	24.1133	53.3933	25.4867	21.3533
Anthocyanin	MYB11/111	CCA0526S0313	MYB	2.99	2.68	0.886667	0.183333
Anthocyanin	MYB12	CCA0691S0036	MYB	14.4567	5.37333	8.84667	4.58
Anthocyanin	MYC1	CCA0724S0020	bHLH	30.8733	15.3267	12.7433	9.21667
Anthocyanin	PAL1/2/3/4	CCA0546S0150	phenylalanine ammonia-lyase	618.413	701.847	569.24	1689.87
Anthocyanin	PAP1(MYB75)/PAP2(MYB90)/MYB113/114	CCA0887S0030	MYB	29.8167	15.6667	13.8167	2.45667
Anthocyanin	TT1	CCA0884S0019	bHLH	2.86667	0.72	1.06667	2.7
Anthocyanin	TT12	CCA1653S0005	MATE	56.7967	32.43	20.7367	76.6267
Anthocyanin	TT19	CCA0924S0001	GSTs（GLUTATHIONE S-TRANSFERASE）	49.3433	117.283	180.987	0.233333
Anthocyanin	TT2(MYB123)	CCA1382S0024	MYB	10.88	11.1833	19.0867	23.28
Anthocyanin	TT8	CCA1400S0020	bHLH	138.91	77.75	119.46	86.13
Anthocyanin	TTG1	CCA0903S0008	WD40	81.7567	116.45	86.0233	114.293
Anthocyanin	UF3GT/UGTs	CCA0539S0156	flavonoid-3-O-glycosyltransferse	0.383333	0.35	0.213333	0.64
Anthocyanin	UGT	CCA1805S0002	UDP- glucosyl transferase	1.22333	1.75333	2.9	42.2433
Anthocyanin	UGT71C/D/B	CCA0582S0097	UDP- glucosyl transferase	13.8167	6.11	4.44667	2.74667
Anthocyanin	UGT73B1/2/3/4/5	CCA0929S0055	UDP- glucosyl transferase	9.03333	5.38667	17.5133	21.6633
Anthocyanin	UGT78D1/2/3/4	CCA0879S0073	UDP- glucosyl transferase	14.2867	4.30333	3.31333	0.99
Anthocyanin	UGT88A1	CCA0708S0130	UDP- glucosyl transferase	38.5533	34.06	23.1267	40.2267
Carotenoid	ABA4	CCA0513S0219	neoxanthin synthase	12.1333	10.8	8.68	9.54333
Carotenoid	ATVDE	CCA1680S0009	violaxanthin de-epoxidase	21.0433	12.4533	11.35	11.14
Carotenoid	CCD1	CCA1550S0033	Carotenoid Cleavage Dioxygenase	86.3	87.0967	62.56	43.2033
Carotenoid	CCD4	CCA1406S0006	Carotenoid Cleavage Dioxygenase	2.32333	0.793333	0.92	2.88333
Carotenoid	CCD7	CCA0884S0105	Carotenoid Cleavage Dioxygenase	0.12	0.0666667	0.0566667	0.04
Carotenoid	CCD8	CCA0674S0126	Carotenoid Cleavage Dioxygenase
Carotenoid	CMK	CCA0082S0016	4-(cytidine 5'-phospho)-2-C-methyl-D-erithritol kinase	21.43	13.99	22.78	17.0533
Carotenoid	DcCCS	CCA1052S0044	capsanthin-capsorubin synthase	1.76	0.806667	1.27333	0.41
Carotenoid	DXR	CCA0259S0002	1-deoxy-D-xylulose-5-phosphate reductoisomerase	70.2633	63.0733	74.4033	33.1067
Carotenoid	DXS1/2	CCA0975S0037	1-deoxy-D-xylulose-5-phosphate synthase	17.2967	18.3533	28.6767	9.65
Carotenoid	GGPS	CCA0854S0004	geanylgeranyl diophosphate synthase	141.983	115.957	152.633	114.7
Carotenoid	HDR	CCA0659S0070	4-hydroxy-3-methylbut-2-enyl diphosphate reductase	92.3533	62.02	117.653	39.0767
Carotenoid	HDS	CCA1187S0024	1-Hydroxy-2-methyl-2-butenyl 4-diphosphate SYNTHASE	48.2067	50.6933	81.9067	90.5567
Carotenoid	IPI	CCA0990S0043	isopentenyl diphosphate isomerase	108.757	94.1	149.307	92.59
Carotenoid	LCYB	CCA1188S0007	lycopene-β-cyclase	9	11.6033	9.75	3.06
Carotenoid	LCYE/LUT2	CCA1033S0054	lycopene-ε-cyclase	21.5267	7.18667	12.3933	9.85667
Carotenoid	LUT1	CCA1151S0050	carotene-ε-hydroxylase	14.8867	13.2633	5.95333	3.45
Carotenoid	LUT5	CCA1252S0001	carotene-β-hydroxylase	32.2833	25.3	23.5833	17.1433
Carotenoid	MCT	CCA0505S0075	2-C-METHYL-D-ERYTHRITOL 4-PHOSPHATE CYTIDYLTRANSFERASE	7.99667	7.20667	13.3	13.4967
Carotenoid	MDS/IPSF/MECPS	CCA0623S0085	2-C-Methyl-D-erythritol2,4-cyclodiphosphate SYNTHASE	47.02	41.9967	49.4267	56.7233
Carotenoid	NCED2/5	CCA1016S0002	9-cis-epoxycarotenoid dioxygenase	1.6	4.27333	2.54333	1.36667
Carotenoid	NCED3/9	CCA0899S0019	9-cis-epoxycarotenoid dioxygenase	1.84333	10.4467	0.786667	1.47333
Carotenoid	NCED6	CCA1334S0010	9-cis-epoxycarotenoid dioxygenase	0.0266667	0.0533333	0.0266667	0.0133333
Carotenoid	PDS3	CCA0831S0026	phytoene desaturase	13.1167	8.64333	7.52333	4.63333
Carotenoid	PSY	CCA0887S0096	phytoene synthase	43.9733	38	27.78	11.19
Carotenoid	ZDS	CCA0733S0081	ξ-carotene desaturase	15.2533	9.75	8.15333	9.95667
Carotenoid	ZEP	CCA0774S0022	zeaxanthin epoxidase	30.4933	35.94	18.3367	13.7167
Carotenoid	ZISO	CCA1601S0008	ε-carotene isomerase	15.28	15.96	12.1167	12.7767
Chlorophyll	CAO(CHL)	CCA0803S0014	Chlorophyllide a oxygenase	18.75	23.7567	15.6667	8.02
Chlorophyll	CHLD	CCA0632S0071	Magnesium chelatase D subunit	24.3167	11.62	9.36333	4.59333
Chlorophyll	CHLG	CCA0700S0013	Chlorophyll synthase	34.64	23.2633	16.2133	16.3067
Chlorophyll	CHLH	CCA0862S0116	Magnesium chelatase H subunit	145.933	110.97	24.9633	6.96333
Chlorophyll	CHLI1/2	CCA0539S0135	Magnesium chelatase I subunit	49.6333	18.6633	17.1033	17.29
Chlorophyll	CHLM	CCA0866S0032	Magnesium proto Ⅸ methyltransferase	113.63	56.9733	99.4367	65.04
Chlorophyll	CLH1/2	CCA0789S0082	Chlorophyllase	26.0733	10.0833	19.5933	20.87
Chlorophyll	CRD1(ACSF)	CCA0694S0099	Mg-protoporphyrin Ⅸ monomethylester	497.033	291.873	240.46	150.967
Chlorophyll	CRN1	CCA0859S0111	PHEOPHYTINASE	9.91	6.10667	4.17	8.18667
Chlorophyll	DVR	CCA0975S0060	3,8-divinyl protochlorophyllide a 8-vinyl reductase	31.2467	26.07	10.1867	7.97333
Chlorophyll	FCC/ACD2	CCA0525S0113	pheide a oxygenase	75.1633	53.5933	73.21	81.1633
Chlorophyll	GSA1/2(HEML1/2)	CCA0573S0090	Glutamate-1-semialdehyde 2,1-aminomutase	84.49	46.1933	55.3167	73.76
Chlorophyll	HEMA1/2/3	CCA0953S0097	Glutamyl-tRNA reductase	61.8267	26.84	28.69	20.88
Chlorophyll	HEMB1/2	CCA1025S0035	Porphobilinogen synthase	144.25	97.8233	129.9	157.703
Chlorophyll	HEMC	CCA0737S0024	Porphobilinogen deaminase	56.8833	26.7167	24	14.0733
Chlorophyll	HEMD	CCA0986S0008	Uroporphyrinogen Ⅲ synthase	18.4967	15.6267	22.2567	26.81
Chlorophyll	HEME1	CCA0576S0246	Uroporphyrinogen Ⅲ decarboxylase	15.2767	8.41	9.42	6.06667
Chlorophyll	HEME2	CCA0676S0015	Uroporphyrinogen Ⅲ decarboxylase	15.8933	7.19667	7.27	1.91333
Chlorophyll	HEMF1/2	CCA0559S0148	Coproporhyrinogen Ⅲ oxidase	101.047	108.05	144.273	143.947
Chlorophyll	HEMG1	CCA0633S0102	Protoporphyrinogen oxidase	0.38	0.12	0	0
Chlorophyll	HEMG2	CCA0779S0258	Protoporphyrinogen oxidase	10.12	7.19	9.43667	6.89667
Chlorophyll	NOL, NYC1-LIKE	CCA1573S0024	chlorophyll b reductase	7.35667	5.8	4.80333	3.34
Chlorophyll	NYC1	CCA1413S0006	chlorophyll b reductase	10.1467	5.48333	1.67333	4.24667
Chlorophyll	NYE1/2	CCA0782S0001		1.84333	0.97	0.946667	6.95333
Chlorophyll	PAO/ACD1	CCA0082S0003	pheide a oxygenase	18.3933	14.9567	8.83	12.4733
Chlorophyll	PORA/B	CCA0576S0111	Protochlorophyllide oxidoreductase	593.893	275.31	304.383	191.163
Chlorophyll	PORC	CCA0679S0038	Protochlorophyllide oxidoreductase	62.88	26.79	40.4833	34.69
