# Supplementary material for: Global Transcriptome Analysis Revealed the Molecular Regulation Mechanism of Pigment and Reactive Oxygen Species Metabolism During the Stigma Development of Carya cathayensis
Source: Front Plant Sci. 2022 May 9;13:881394. doi: 10.3389/fpls.2022.881394 (PMC9125253; doi:10.3389/fpls.2022.881394)
Supplement: Supplementary file 8 [file Table_7.XLSX]

## Sheet: Sheet1
supplementary table 7 Gene and module colors
Gene	moduleColor
CCA0505S0093	darkred
CCA1008S0021	darkred
CCA0924S0001	firebrick4
CCA1126S0075	darkred
CCA0873S0001	darkturquoise
CCA1034S0057	darkred
CCA0016S0007	firebrick4
CCA0842S0017	darkred
CCA1105S0008	darkred
BGI_novel_G001279	darkred
CCA0597S0117	darkred
CCA1015S0006	darkred
BGI_novel_G000475	firebrick4
BGI_novel_G001579	firebrick4
BGI_novel_G001130	darkred
BGI_novel_G000314	darkred
BGI_novel_G001489	darkred
BGI_novel_G001312	darkturquoise
CCA1063S0007	darkred
BGI_novel_G000559	darkred
CCA1113S0020	darkred
BGI_novel_G000131	firebrick4
CCA0649S0104	darkturquoise
CCA0539S0153	darkred
CCA0674S0190	darkred
CCA0929S0027	darkred
CCA1406S0020	darkred
CCA1268S0035	firebrick4
CCA1597S0020	darkred
CCA0513S0235	darkred
BGI_novel_G002637	darkred
BGI_novel_G002367	firebrick4
CCA0884S0218	firebrick4
BGI_novel_G002278	blue2
BGI_novel_G002387	darkturquoise
CCA1660S0005	darkturquoise
BGI_novel_G002922	darkturquoise
CCA1016S0033	darkred
BGI_novel_G001990	firebrick4
CCA1057S0015	firebrick4
CCA1660S0004	darkturquoise
CCA0906S0019	darkturquoise
BGI_novel_G000767	firebrick4
CCA0582S0176	firebrick4
BGI_novel_G002707	darkred
CCA0743S0032	darkred
CCA0691S0134	firebrick4
CCA0405S0001	firebrick4
CCA1219S0048	darkred
BGI_novel_G001577	firebrick4
CCA0582S0158	darkred
CCA1577S0032	darkred
BGI_novel_G000421	brown2
CCA0505S0094	darkred
BGI_novel_G000816	darkturquoise
CCA0874S0067	brown2
CCA0546S0292	darkred
CCA1559S0024	firebrick4
CCA0597S0136	darkred
BGI_novel_G000615	darkred
CCA1273S0041	blue2
CCA1041S0081	darkred
CCA0851S0130	firebrick4
CCA1768S0004	darkred
CCA1016S0049	darkred
BGI_novel_G000546	darkred
CCA0646S0101	brown2
BGI_novel_G000289	darkred
CCA1199S0021	darkred
BGI_novel_G001857	darkred
CCA0514S0272	darkred
CCA0566S0153	darkred
CCA1656S0004	firebrick4
CCA0607S0025	brown2
CCA0582S0156	darkred
CCA0813S0026	darkred
BGI_novel_G002635	darkred
CCA1207S0001	darkorange
CCA1228S0028	darkred
BGI_novel_G002571	firebrick4
BGI_novel_G001574	darkred
CCA0884S0165	blue2
CCA0754S0049	darkred
CCA0887S0059	firebrick4
CCA0849S0072	darkred
CCA0698S0219	brown2
CCA1312S0024	blue2
BGI_novel_G000003	firebrick4
CCA1228S0027	darkred
CCA1281S0003	darkred
CCA0784S0082	darkred
CCA0918S0094	firebrick4
CCA1287S0014	darkred
CCA0597S0118	darkred
BGI_novel_G002314	darkred
CCA0784S0034	firebrick4
CCA0582S0153	darkred
BGI_novel_G001725	darkred
CCA0568S0019	darkred
CCA1350S0015	blue2
CCA0918S0177	blue2
CCA0779S0158	darkred
CCA0953S0009	darkred
CCA1015S0046	darkred
CCA0782S0177	darkred
BGI_novel_G000564	darkred
BGI_novel_G002209	darkred
CCA0984S0067	firebrick4
BGI_novel_G001051	firebrick4
CCA0522S0221	brown2
CCA1126S0086	darkred
CCA1252S0025	darkred
CCA0522S0223	blue2
CCA0781S0016	firebrick4
CCA0718S0040	blue2
CCA0816S0099	darkred
CCA1228S0062	firebrick4
CCA0533S0077	darkred
CCA0982S0032	firebrick4
CCA0829S0014	darkred
CCA0953S0042	blue2
CCA1528S0037	brown2
CCA0006S0007	darkred
BGI_novel_G000697	blue2
BGI_novel_G001238	darkred
CCA0500S0262	darkred
CCA0836S0100	darkturquoise
CCA0784S0006	blue2
CCA0897S0151	darkturquoise
CCA0500S0254	darkred
CCA1016S0047	blue2
CCA0616S0171	darkred
CCA1051S0020	blue2
CCA1588S0006	darkturquoise
CCA1343S0007	firebrick4
CCA0589S0139	darkred
CCA0524S0178	firebrick4
CCA0582S0152	darkred
CCA1461S0024	darkred
CCA0582S0050	darkred
CCA1034S0059	darkred
CCA1324S0007	darkred
CCA1644S0019	darkred
BGI_novel_G001430	firebrick4
BGI_novel_G001656	firebrick4
CCA0674S0155	firebrick4
CCA0582S0162	darkred
CCA1739S0003	firebrick4
CCA1391S0027	darkred
CCA0500S0157	firebrick4
CCA0698S0220	darkturquoise
CCA0370S0001	darkred
CCA0829S0004	darkturquoise
CCA1565S0019	darkorange
CCA0500S0263	firebrick4
CCA1591S0021	firebrick4
CCA1573S0013	darkred
CCA1132S0044	darkred
CCA0824S0016	firebrick4
CCA0709S0011	firebrick4
CCA0659S0254	antiquewhite2
BGI_novel_G002633	darkred
CCA1419S0001	firebrick4
CCA0686S0037	darkred
CCA0430S0001	blue2
CCA0691S0110	darkred
CCA1008S0020	darkred
BGI_novel_G000561	darkred
CCA0829S0008	darkred
CCA0887S0122	firebrick4
CCA0887S0124	firebrick4
CCA0589S0220	brown2
CCA0886S0053	firebrick4
CCA1017S0028	brown2
BGI_novel_G000445	firebrick4
CCA0884S0196	darkred
CCA0799S0106	blue2
BGI_novel_G000560	darkred
CCA0704S0030	firebrick4
CCA1731S0015	darkred
CCA0514S0261	darkturquoise
CCA0774S0065	darkred
CCA1236S0003	darkred
CCA1524S0021	antiquewhite2
CCA0838S0018	blue2
CCA1768S0010	darkred
CCA0905S0022	firebrick4
CCA1588S0004	darkred
BGI_novel_G002093	darkturquoise
CCA0597S0113	darkred
CCA1407S0015	darkred
CCA0555S0162	blue2
BGI_novel_G002087	firebrick4
BGI_novel_G001149	blue2
CCA0529S0010	darkred
BGI_novel_G002933	firebrick4
BGI_novel_G001580	firebrick4
CCA1768S0009	darkred
CCA0839S0035	darkorange
CCA1015S0044	blue2
CCA0884S0190	darkred
CCA0922S0014	firebrick4
BGI_novel_G002454	darkturquoise
CCA0857S0067	darkred
CCA0977S0048	blue2
CCA0782S0023	blue2
BGI_novel_G001750	firebrick4
CCA1365S0035	darkred
CCA1015S0111	darkred
CCA1203S0035	firebrick4
CCA0505S0167	firebrick4
BGI_novel_G000362	darkturquoise
CCA0800S0081	blue2
CCA1068S0007	darkred
CCA1273S0020	firebrick4
CCA0686S0082	blue2
CCA0589S0069	darkred
CCA1250S0028	darkred
CCA0953S0094	firebrick4
CCA0633S0108	darkred
BGI_novel_G002012	blue2
CCA0859S0003	darkred
CCA1310S0016	darkred
CCA0904S0041	darkturquoise
CCA1744S0002	blue2
CCA1744S0003	blue2
BGI_novel_G000219	blue2
CCA0905S0105	darkred
CCA0813S0028	blue2
CCA1770S0006	darkred
CCA0133S0006	blue2
CCA1326S0044	firebrick4
BGI_novel_G001619	darkred
CCA1223S0020	brown2
CCA1371S0022	darkred
CCA1330S0042	darkred
CCA1637S0003	blue2
CCA1780S0003	firebrick4
CCA1203S0027	darkred
CCA0500S0287	firebrick4
BGI_novel_G002279	blue2
BGI_novel_G001383	blue2
CCA0605S0038	darkred
CCA0507S0049	darkred
BGI_novel_G001728	darkred
CCA1041S0020	darkred
CCA1184S0010	darkred
CCA1094S0098	blue2
BGI_novel_G001873	firebrick4
CCA1770S0008	darkred
CCA1068S0041	darkred
CCA0679S0037	blue2
CCA0852S0081	darkred
CCA0552S0096	darkred
CCA1094S0123	darkturquoise
CCA0565S0038	firebrick4
BGI_novel_G002521	darkred
CCA0623S0077	darkred
CCA0836S0006	darkturquoise
CCA0886S0052	darkred
CCA1310S0017	darkred
CCA0678S0203	darkred
BGI_novel_G001462	firebrick4
CCA0791S0043	darkred
CCA0514S0157	darkred
CCA1555S0024	darkred
CCA1324S0056	darkred
CCA1463S0003	darkred
CCA0500S0237	blue2
CCA0757S0061	firebrick4
CCA0632S0069	darkred
CCA0854S0012	firebrick4
CCA1126S0087	darkred
CCA0822S0064	darkred
CCA1567S0010	blue2
CCA0174S0001	firebrick4
CCA0587S0225	darkred
CCA1041S0082	darkred
CCA0674S0014	darkred
CCA0659S0229	firebrick4
CCA1002S0021	antiquewhite2
BGI_novel_G002638	darkred
BGI_novel_G001378	pink4
CCA1532S0023	firebrick4
CCA0589S0012	darkred
CCA0743S0033	darkred
CCA0866S0035	darkred
CCA0862S0116	darkred
BGI_novel_G001911	blue2
CCA0708S0015	pink4
CCA0899S0061	blue2
CCA1300S0043	darkturquoise
CCA0542S0150	blue2
CCA0884S0023	firebrick4
CCA0568S0063	firebrick4
CCA0662S0045	darkred
CCA0524S0054	firebrick4
CCA1379S0012	darkred
BGI_novel_G000218	darkturquoise
CCA0828S0039	darkred
CCA0129S0003	darkred
CCA1051S0024	darkred
BGI_novel_G000163	darkred
BGI_novel_G002199	darkred
CCA0649S0079	darkred
BGI_novel_G002862	darkred
BGI_novel_G001145	blue2
CCA0587S0198	darkred
CCA0552S0222	darkred
CCA0573S0093	firebrick4
CCA1005S0030	firebrick4
BGI_novel_G002863	darkred
CCA0670S0143	darkred
CCA1544S0017	darkred
CCA0942S0066	darkturquoise
CCA0652S0049	darkred
CCA0686S0079	blue2
BGI_novel_G002634	darkred
CCA1550S0031	darkred
CCA0970S0016	darkred
CCA1126S0036	firebrick4
CCA1530S0022	darkred
BGI_novel_G000960	darkred
BGI_novel_G002636	darkred
CCA1406S0021	firebrick4
CCA0505S0264	firebrick4
CCA0975S0100	darkred
CCA0705S0074	darkred
CCA0623S0106	darkred
CCA1063S0008	darkred
CCA0924S0038	firebrick4
BGI_novel_G001578	firebrick4
CCA0779S0231	darkred
CCA0505S0091	darkred
CCA1217S0020	firebrick4
CCA1034S0062	darkred
CCA0894S0028	firebrick4
BGI_novel_G001910	blue2
CCA1500S0024	darkturquoise
CCA1797S0011	darkred
CCA1084S0044	darkred
CCA1591S0016	brown2
CCA0524S0307	darkred
CCA0849S0007	darkred
CCA0935S0037	darkred
CCA1100S0020	blue2
CCA0854S0013	firebrick4
CCA0552S0202	firebrick4
CCA0800S0129	darkred
BGI_novel_G001153	blue2
CCA0984S0047	darkred
CCA0016S0001	firebrick4
CCA0879S0053	darkturquoise
BGI_novel_G002848	blue2
BGI_novel_G001751	firebrick4
CCA1051S0067	firebrick4
CCA0513S0287	firebrick4
CCA1045S0003	darkred
CCA0862S0090	darkred
BGI_novel_G002683	blue2
BGI_novel_G000962	darkred
CCA0698S0062	brown2
CCA0958S0027	firebrick4
CCA1530S0012	darkred
CCA0587S0127	brown2
BGI_novel_G001467	firebrick4
CCA0854S0086	darkred
CCA0698S0218	blue2
CCA0829S0009	darkred
CCA1463S0001	darkred
CCA1015S0027	firebrick4
CCA0505S0105	darkred
CCA1106S0022	blue2
BGI_novel_G001087	firebrick4
CCA0670S0077	blue2
CCA0597S0203	darkturquoise
CCA0754S0128	firebrick4
CCA1027S0006	darkred
BGI_novel_G002152	blue2
CCA0526S0212	darkturquoise
CCA0513S0187	darkred
CCA0552S0072	blue2
CCA1526S0010	blue2
CCA0539S0148	darkred
CCA0763S0081	darkorange
BGI_novel_G002921	darkred
CCA1363S0017	blue2
CCA0884S0053	blue2
CCA0857S0090	darkorange
CCA0984S0053	brown2
CCA1046S0113	darkturquoise
CCA0533S0051	darkred
CCA0247S0001	darkred
CCA0700S0079	darkred
CCA0909S0092	pink4
CCA0616S0156	firebrick4
CCA0522S0218	blue2
CCA0763S0031	darkred
CCA0524S0049	firebrick4
CCA0932S0024	firebrick4
CCA1261S0055	darkred
CCA1147S0027	darkturquoise
CCA0670S0062	blue2
CCA1273S0013	brown2
CCA0942S0012	blue2
CCA1091S0048	blue2
CCA0546S0123	darkred
CCA1005S0031	darkred
BGI_novel_G001539	blue2
CCA0125S0002	darkturquoise
BGI_novel_G001427	darkturquoise
CCA1027S0075	brown2
CCA1085S0021	darkred
CCA0652S0119	darkred
CCA0944S0029	darkred
CCA0782S0159	blue2
CCA0659S0194	darkred
CCA0582S0103	darkturquoise
CCA0552S0041	firebrick4
CCA0883S0013	firebrick4
CCA0587S0194	darkturquoise
CCA0568S0029	darkred
BGI_novel_G002094	darkturquoise
CCA0958S0023	darkred
CCA1219S0020	darkred
CCA1013S0078	darkred
CCA0568S0067	darkred
CCA1261S0058	darkred
CCA0765S0089	brown2
CCA0108S0014	blue2
BGI_novel_G001547	darkred
CCA0709S0044	darkred
CCA0587S0156	darkred
CCA1704S0022	darkturquoise
CCA0555S0106	firebrick4
CCA0649S0088	darkred
BGI_novel_G002023	darkred
CCA0638S0096	firebrick4
CCA0694S0061	darkred
CCA0905S0118	firebrick4
CCA0681S0075	darkred
BGI_novel_G002857	blue2
CCA0698S0050	darkred
CCA1681S0009	darkred
BGI_novel_G002574	darkred
CCA1312S0010	firebrick4
CCA0616S0169	darkred
CCA0576S0043	blue2
CCA0810S0026	darkred
CCA0646S0116	blue2
CCA1085S0001	darkred
CCA1089S0006	darkred
CCA1507S0013	darkred
CCA0555S0163	blue2
CCA1048S0009	blue2
CCA0890S0008	darkred
CCA0386S0001	darkred
CCA0513S0295	blue2
CCA0555S0185	firebrick4
CCA0884S0071	darkred
CCA1194S0034	darkred
BGI_novel_G001869	darkturquoise
CCA0718S0053	darkred
BGI_novel_G000766	firebrick4
CCA1130S0032	firebrick4
BGI_novel_G001405	blue2
CCA1041S0019	firebrick4
CCA0638S0119	darkred
BGI_novel_G001752	firebrick4
BGI_novel_G001113	blue2
CCA1391S0021	blue2
CCA1524S0007	darkred
CCA0533S0086	firebrick4
CCA1531S0031	firebrick4
CCA0505S0095	darkred
CCA0568S0053	firebrick4
CCA0883S0036	darkred
CCA1278S0009	firebrick4
CCA0539S0277	firebrick4
CCA0542S0086	darkred
CCA0941S0040	darkred
CCA0698S0029	darkred
CCA1075S0042	darkred
CCA1120S0008	firebrick4
CCA1000S0016	darkred
CCA0816S0002	darkred
CCA0582S0101	firebrick4
CCA0957S0009	darkred
CCA0947S0023	firebrick4
CCA0700S0083	blue2
BGI_novel_G001152	blue2
CCA1194S0033	darkred
BGI_novel_G001136	darkred
CCA0953S0059	blue2
CCA0576S0253	brown2
CCA1731S0019	darkred
CCA0779S0227	darkred
CCA1391S0023	blue2
CCA1768S0005	darkred
CCA1593S0036	blue2
CCA0839S0018	darkred
CCA0782S0054	darkred
CCA1240S0023	brown2
CCA1128S0001	darkturquoise
CCA0799S0064	darkorange
BGI_novel_G002113	darkred
BGI_novel_G000041	darkred
CCA0679S0073	blue2
CCA0505S0160	darkred
CCA0879S0073	darkred
CCA0859S0013	blue2
CCA0583S0105	firebrick4
CCA0413S0001	darkred
CCA0791S0071	darkred
CCA1580S0002	blue2
CCA1163S0015	blue2
CCA1107S0005	blue2
CCA0779S0030	darkred
CCA0887S0029	firebrick4
CCA0646S0058	darkred
CCA1768S0013	darkred
CCA0539S0005	darkred
CCA1285S0012	darkred
CCA0514S0007	brown2
CCA0555S0018	brown2
CCA1594S0009	darkred
CCA1324S0057	darkred
CCA1365S0032	darkorange
CCA0539S0178	darkred
CCA0628S0078	darkturquoise
CCA0623S0083	brown2
CCA0582S0046	blue2
CCA0899S0083	blue2
CCA0754S0099	darkred
CCA0514S0063	darkred
BGI_novel_G000777	blue2
CCA0633S0063	darkturquoise
CCA0524S0137	darkred
BGI_novel_G002095	antiquewhite2
CCA0513S0282	darkred
CCA1184S0036	blue2
CCA1479S0064	pink4
CCA0525S0155	darkred
CCA0546S0052	darkred
CCA0546S0113	firebrick4
CCA1377S0020	darkred
CCA1456S0031	darkred
CCA0975S0109	darkred
BGI_novel_G001144	blue2
CCA0879S0061	blue2
CCA0686S0036	darkorange
CCA1079S0019	blue2
CCA1400S0029	darkred
CCA0906S0085	darkturquoise
BGI_novel_G002065	darkred
CCA0763S0064	darkturquoise
CCA0704S0069	firebrick4
CCA0526S0313	darkred
CCA0563S0092	darkred
CCA0826S0009	darkturquoise
BGI_novel_G000920	darkturquoise
CCA0839S0120	darkred
CCA0516S0111	brown2
CCA0824S0038	darkred
CCA1531S0029	firebrick4
CCA0998S0036	blue2
CCA0680S0101	firebrick4
CCA1279S0041	darkred
BGI_novel_G001543	darkred
BGI_novel_G002860	firebrick4
CCA1285S0011	darkred
BGI_novel_G001981	firebrick4
CCA0632S0124	darkred
CCA1194S0027	darkred
CCA0829S0087	firebrick4
CCA0546S0051	darkred
BGI_novel_G002144	blue2
CCA1320S0008	blue2
CCA1268S0015	darkred
CCA0520S0101	darkred
BGI_novel_G002133	blue2
CCA1294S0036	blue2
CCA0555S0085	blue2
CCA1544S0006	darkred
BGI_novel_G000952	darkred
CCA0890S0061	blue2
CCA0906S0029	darkred
CCA0981S0045	darkred
CCA1621S0007	darkred
CCA0789S0148	darkred
CCA1002S0045	darkred
CCA0897S0070	blue2
CCA0063S0007	darkred
CCA0859S0080	darkred
CCA0887S0079	blue2
CCA0784S0046	darkred
CCA1587S0018	brown2
CCA0898S0060	darkred
CCA1161S0008	darkred
CCA1041S0064	darkturquoise
CCA1107S0042	darkred
CCA0090S0012	darkred
CCA0662S0004	darkred
CCA0507S0131	darkred
BGI_novel_G002502	blue2
CCA0765S0003	firebrick4
CCA0522S0013	firebrick4
CCA0616S0018	darkred
CCA0505S0056	blue2
BGI_novel_G000179	darkred
BGI_novel_G002599	blue2
CCA0649S0060	darkred
CCA0698S0049	blue2
CCA0598S0128	darkred
CCA0533S0200	darkred
BGI_novel_G000286	darkred
CCA0704S0110	firebrick4
CCA1409S0001	darkred
BGI_novel_G001230	darkred
CCA0133S0008	darkturquoise
CCA1407S0022	firebrick4
BGI_novel_G002613	firebrick4
BGI_novel_G002481	darkturquoise
CCA1320S0012	brown2
CCA0582S0047	blue2
CCA0932S0054	darkturquoise
CCA0779S0123	blue2
CCA0676S0074	blue2
CCA1063S0017	darkred
CCA1500S0022	darkturquoise
CCA0718S0111	darkred
CCA1097S0009	darkred
CCA1199S0040	darkorange
CCA0555S0118	darkred
CCA1002S0087	firebrick4
CCA0659S0050	blue2
CCA0848S0114	darkred
CCA1555S0026	darkred
CCA0535S0004	darkred
CCA0859S0102	blue2
CCA1606S0001	darkred
CCA1300S0004	firebrick4
CCA0852S0020	firebrick4
CCA0524S0257	darkred
CCA1441S0004	firebrick4
CCA0183S0007	pink4
CCA0578S0133	darkred
BGI_novel_G001362	darkred
CCA0925S0069	darkturquoise
CCA0589S0169	darkred
CCA1046S0120	darkred
CCA0754S0092	darkred
CCA0426S0001	firebrick4
CCA1615S0011	firebrick4
CCA0559S0031	darkred
CCA0524S0045	blue2
CCA0831S0059	antiquewhite2
CCA1085S0018	darkred
CCA0642S0024	blue2
CCA1282S0025	darkturquoise
CCA0526S0253	darkred
CCA0899S0019	brown2
BGI_novel_G000900	darkred
CCA0587S0192	darkred
BGI_novel_G002486	darkorange
BGI_novel_G002134	blue2
CCA1648S0018	darkred
CCA0700S0074	darkred
BGI_novel_G001652	darkturquoise
CCA1251S0051	darkred
CCA0836S0096	blue2
CCA1324S0009	blue2
BGI_novel_G001823	blue2
CCA0546S0130	darkred
BGI_novel_G001748	firebrick4
BGI_novel_G000359	darkred
CCA0851S0069	darkred
BGI_novel_G002465	firebrick4
CCA1526S0013	blue2
CCA0183S0022	blue2
CCA0806S0130	pink4
BGI_novel_G002566	blue2
CCA1060S0024	firebrick4
CCA0652S0004	darkturquoise
CCA1135S0007	darkturquoise
CCA1289S0008	darkred
BGI_novel_G001264	brown2
CCA0613S0022	darkred
CCA0539S0273	darkturquoise
CCA1140S0021	darkred
CCA0533S0193	firebrick4
CCA0935S0086	darkred
CCA1555S0003	firebrick4
CCA0852S0031	darkred
CCA0887S0030	darkred
CCA0828S0083	firebrick4
CCA1604S0016	firebrick4
CCA1168S0010	firebrick4
CCA0718S0099	blue2
CCA0862S0124	darkred
CCA1257S0018	darkred
CCA1016S0018	darkred
CCA1524S0076	pink4
CCA0881S0072	darkred
CCA0533S0144	darkred
CCA0514S0013	firebrick4
CCA0525S0038	brown2
CCA0698S0208	blue2
BGI_novel_G001826	darkred
BGI_novel_G001754	firebrick4
CCA0546S0302	pink4
CCA1357S0010	firebrick4
CCA0691S0005	darkred
BGI_novel_G000765	firebrick4
CCA0876S0030	blue2
CCA1410S0038	darkred
CCA1601S0032	darkorange
CCA0526S0130	firebrick4
CCA0774S0057	darkred
CCA0632S0144	darkred
CCA0587S0187	darkred
CCA0555S0076	darkred
CCA0904S0068	darkred
CCA1558S0001	darkorange
CCA1420S0025	firebrick4
CCA0919S0002	blue2
CCA1037S0030	darkred
CCA1326S0037	antiquewhite2
CCA1212S0007	darkred
CCA1696S0016	darkred
CCA1577S0015	blue2
CCA0986S0043	darkred
CCA0762S0031	firebrick4
CCA1130S0040	blue2
CCA1324S0028	firebrick4
CCA0616S0065	firebrick4
BGI_novel_G002559	darkred
BGI_novel_G002828	darkturquoise
CCA0526S0058	darkturquoise
CCA0514S0270	blue2
CCA0929S0001	blue2
CCA0589S0067	firebrick4
CCA1495S0011	darkred
CCA0747S0015	darkred
CCA0566S0134	darkred
CCA1312S0018	darkred
BGI_novel_G000988	darkred
CCA0754S0150	darkred
CCA0549S0075	firebrick4
CCA1605S0003	firebrick4
CCA0546S0081	darkred
CCA1212S0009	pink4
BGI_novel_G002149	blue2
CCA1357S0012	brown2
CCA0662S0044	darkred
CCA0549S0097	firebrick4
CCA0147S0005	firebrick4
CCA1046S0123	darkred
CCA0524S0186	darkred
CCA0598S0089	brown2
BGI_novel_G002064	darkred
CCA1063S0077	darkred
CCA0859S0160	darkred
CCA1479S0081	firebrick4
CCA1225S0025	firebrick4
CCA0595S0074	pink4
CCA0831S0033	darkred
CCA0524S0056	firebrick4
CCA0947S0055	firebrick4
CCA0090S0005	darkred
BGI_novel_G002810	antiquewhite2
BGI_novel_G002831	darkred
CCA1194S0049	firebrick4
CCA0724S0052	blue2
CCA0674S0192	darkred
CCA0779S0064	darkred
CCA1164S0002	darkred
CCA0923S0014	darkred
CCA0589S0118	firebrick4
CCA0789S0125	firebrick4
CCA0881S0049	darkturquoise
CCA1550S0022	firebrick4
CCA0923S0013	darkred
CCA0813S0002	darkred
CCA0513S0336	darkturquoise
CCA0555S0122	firebrick4
BGI_novel_G001916	darkturquoise
CCA1357S0011	firebrick4
CCA0964S0030	darkred
CCA0676S0005	blue2
CCA0897S0138	darkred
CCA1648S0012	blue2
BGI_novel_G001603	darkred
CCA1498S0024	darkred
CCA0576S0050	firebrick4
CCA0652S0020	blue2
BGI_novel_G002206	darkred
BGI_novel_G000948	darkorange
CCA1559S0010	darkred
CCA1407S0021	darkred
CCA1744S0001	blue2
CCA0555S0038	brown2
CCA0542S0128	darkred
CCA0597S0133	darkturquoise
CCA1135S0006	blue2
CCA0552S0067	brown2
CCA0700S0126	darkturquoise
CCA0649S0077	firebrick4
CCA0634S0033	darkred
CCA0559S0138	blue2
CCA0659S0037	darkred
CCA0884S0119	brown2
CCA1391S0034	firebrick4
CCA0549S0066	antiquewhite2
CCA0023S0005	darkred
CCA1033S0024	darkturquoise
BGI_novel_G000693	blue2
BGI_novel_G002061	blue2
CCA0605S0074	firebrick4
CCA0526S0324	darkred
CCA1257S0046	darkred
CCA1063S0050	darkred
CCA1757S0010	darkturquoise
CCA0163S0005	darkred
CCA0876S0040	darkred
CCA0589S0196	brown2
CCA0736S0022	blue2
CCA1179S0014	darkred
CCA0582S0118	darkred
CCA0500S0228	darkred
CCA1498S0057	darkred
CCA0524S0101	darkred
CCA1123S0078	darkturquoise
CCA0510S0094	firebrick4
CCA1015S0033	firebrick4
CCA0708S0097	blue2
CCA0784S0060	darkred
CCA0563S0045	darkturquoise
CCA0670S0055	darkred
CCA0583S0082	darkred
CCA0929S0099	darkred
CCA1281S0026	darkred
CCA0514S0009	blue2
CCA0819S0035	darkred
BGI_novel_G001319	darkred
BGI_novel_G001244	brown2
CCA0522S0179	darkred
CCA0831S0012	darkred
CCA1277S0069	darkred
CCA0533S0225	blue2
CCA0831S0020	darkred
CCA1163S0032	darkturquoise
CCA0505S0169	blue2
CCA0500S0253	darkred
CCA0674S0097	darkred
CCA0881S0026	darkred
CCA0520S0248	darkturquoise
CCA0936S0071	blue2
CCA0944S0078	brown2
CCA1130S0002	firebrick4
CCA0918S0147	darkred
CCA0524S0002	darkred
CCA0533S0169	firebrick4
CCA0704S0057	brown2
CCA0522S0152	darkred
CCA0884S0154	blue2
CCA1310S0012	blue2
BGI_novel_G001451	blue2
CCA0678S0133	darkred
CCA0724S0069	darkturquoise
CCA0597S0092	blue2
BGI_novel_G001150	blue2
CCA0576S0071	darkred
CCA0782S0035	darkred
CCA0063S0003	darkred
CCA0887S0117	darkred
CCA0582S0105	darkred
CCA1391S0010	darkred
CCA0582S0174	firebrick4
CCA1082S0027	firebrick4
CCA0589S0197	firebrick4
CCA1223S0017	blue2
CCA0733S0077	darkorange
CCA1111S0049	firebrick4
CCA1091S0034	blue2
CCA1079S0077	darkred
CCA0642S0016	brown2
BGI_novel_G002399	blue2
CCA0522S0122	darkred
CCA0704S0157	darkred
CCA0555S0119	darkred
CCA1079S0054	darkred
CCA0533S0106	darkturquoise
CCA0716S0035	darkred
BGI_novel_G002109	blue2
CCA0876S0083	blue2
CCA0763S0037	firebrick4
CCA0981S0022	blue2
CCA0824S0089	darkred
CCA0704S0041	darkred
CCA0500S0123	firebrick4
BGI_novel_G001129	darkturquoise
CCA0961S0101	firebrick4
CCA0904S0169	darkred
BGI_novel_G001798	blue2
CCA0851S0176	darkred
BGI_novel_G000568	darkred
BGI_novel_G000295	darkred
CCA0546S0016	darkturquoise
BGI_novel_G000292	darkred
CCA0887S0102	darkturquoise
CCA0866S0021	firebrick4
CCA1573S0007	darkred
CCA0122S0001	firebrick4
CCA1219S0086	darkred
CCA0555S0161	blue2
BGI_novel_G002527	darkred
CCA0568S0038	blue2
CCA1500S0025	firebrick4
CCA0679S0128	blue2
CCA0583S0049	darkred
CCA0565S0042	darkred
BGI_novel_G000979	firebrick4
CCA0784S0105	darkred
BGI_novel_G001443	blue2
CCA0904S0088	firebrick4
CCA0876S0081	darkred
CCA0573S0077	darkorange
CCA0909S0082	blue2
CCA1179S0009	darkred
CCA0879S0065	darkturquoise
CCA1524S0079	brown2
CCA1280S0004	blue2
CCA1066S0006	darkred
CCA0906S0078	darkred
CCA1015S0004	firebrick4
CCA1688S0001	darkred
BGI_novel_G000949	blue2
CCA1106S0062	darkred
BGI_novel_G002861	firebrick4
BGI_novel_G000623	darkred
CCA0678S0081	darkred
CCA0505S0039	darkred
CCA1094S0141	darkred
CCA0674S0175	darkred
CCA0542S0076	darkturquoise
CCA0676S0036	firebrick4
BGI_novel_G002260	darkturquoise
CCA0774S0010	darkred
CCA0507S0294	blue2
CCA0566S0148	brown2
CCA0906S0070	darkred
CCA0957S0012	darkred
BGI_novel_G001278	darkred
CCA0546S0046	firebrick4
CCA0638S0109	blue2
CCA0936S0057	darkorange
CCA0806S0040	firebrick4
CCA0665S0091	blue2
CCA1802S0010	brown2
BGI_novel_G000742	blue2
CCA1164S0023	darkred
CCA0904S0075	blue2
CCA0549S0138	darkred
CCA0822S0051	darkred
BGI_novel_G002584	blue2
CCA0063S0009	darkred
CCA0907S0091	antiquewhite2
CCA0520S0006	darkred
CCA0718S0065	darkturquoise
CCA0642S0045	darkred
CCA0779S0078	darkred
CCA0854S0027	darkred
CCA1441S0026	blue2
CCA0696S0071	darkred
CCA0533S0240	pink4
CCA0555S0147	darkred
CCA1223S0026	darkred
CCA1135S0008	darkturquoise
CCA1045S0009	darkred
CCA0526S0316	darkturquoise
CCA0533S0111	darkred
CCA0899S0047	darkred
CCA0680S0064	blue2
CCA0555S0180	blue2
CCA0522S0233	darkred
CCA0589S0245	darkred
CCA0782S0144	darkred
BGI_novel_G002328	firebrick4
CCA1644S0011	darkred
CCA0897S0149	darkred
CCA0907S0079	darkturquoise
CCA1015S0076	darkred
BGI_novel_G001205	darkred
BGI_novel_G000194	brown2
CCA0632S0034	darkred
CCA0961S0066	darkred
CCA0806S0142	darkturquoise
CCA0678S0128	firebrick4
CCA1095S0068	darkred
CCA0676S0043	darkred
CCA0918S0215	blue2
BGI_novel_G002854	blue2
CCA0578S0074	firebrick4
CCA1079S0012	blue2
CCA0006S0018	darkred
CCA1663S0011	blue2
BGI_novel_G000101	darkred
CCA0876S0077	darkred
BGI_novel_G001749	firebrick4
BGI_novel_G001970	firebrick4
CCA0803S0041	antiquewhite2
CCA1005S0001	darkred
CCA0638S0198	darkred
CCA0552S0063	darkred
CCA0854S0014	darkorange
CCA1132S0009	darkred
CCA0676S0067	firebrick4
CCA0633S0096	darkred
CCA0704S0136	firebrick4
CCA1422S0026	antiquewhite2
CCA1528S0039	brown2
BGI_novel_G001280	darkred
CCA0747S0013	firebrick4
CCA0736S0016	darkred
CCA0500S0197	pink4
BGI_novel_G000293	darkred
CCA0674S0034	darkred
CCA1157S0054	darkred
CCA0582S0177	firebrick4
BGI_novel_G001404	blue2
CCA0539S0133	darkred
CCA0522S0222	blue2
BGI_novel_G000290	darkred
CCA1132S0037	darkturquoise
CCA1456S0042	darkred
CCA0704S0147	darkred
CCA0876S0080	darkred
CCA0566S0168	darkturquoise
CCA0676S0080	blue2
BGI_novel_G002895	darkturquoise
BGI_novel_G001146	blue2
CCA0869S0052	darkred
CCA0718S0149	darkred
CCA0779S0016	firebrick4
CCA1123S0015	darkorange
CCA0964S0075	darkturquoise
CCA0981S0054	darkred
BGI_novel_G002894	darkturquoise
CCA0698S0148	blue2
CCA0632S0031	darkred
BGI_novel_G002768	blue2
CCA0505S0281	firebrick4
BGI_novel_G001480	darkred
CCA0990S0058	firebrick4
CCA0704S0002	blue2
CCA0638S0102	darkturquoise
CCA1189S0002	blue2
CCA0989S0051	darkred
CCA0905S0094	darkred
CCA0555S0134	blue2
CCA0376S0003	darkred
CCA0789S0061	darkred
CCA0539S0057	darkturquoise
CCA1738S0016	firebrick4
CCA0848S0063	darkred
BGI_novel_G000686	darkturquoise
CCA1228S0029	darkred
CCA0520S0216	brown2
CCA0623S0103	darkred
CCA1228S0039	darkturquoise
CCA0500S0294	blue2
CCA0784S0010	darkturquoise
BGI_novel_G000384	antiquewhite2
CCA0670S0043	blue2
CCA0765S0057	darkred
CCA1458S0014	darkred
BGI_novel_G001403	darkturquoise
CCA0774S0016	blue2
CCA0912S0028	blue2
CCA0555S0136	blue2
CCA0632S0107	darkred
CCA0680S0054	firebrick4
CCA0810S0078	darkred
CCA1097S0041	darkred
CCA0597S0020	darkred
CCA1663S0002	blue2
BGI_novel_G002919	firebrick4
CCA0859S0055	darkred
CCA0502S0152	darkred
CCA1568S0014	darkturquoise
CCA0733S0131	darkred
CCA0108S0019	darkred
CCA0701S0152	darkred
CCA1479S0019	darkred
CCA0991S0015	firebrick4
CCA0898S0010	firebrick4
CCA0676S0015	darkred
CCA0555S0111	firebrick4
CCA0983S0062	darkred
CCA0718S0150	darkred
CCA0510S0090	darkred
CCA0904S0141	brown2
CCA0607S0039	darkred
CCA0779S0171	darkred
CCA0806S0068	darkred
CCA0510S0114	blue2
CCA0906S0045	darkred
CCA0782S0127	blue2
BGI_novel_G001753	firebrick4
BGI_novel_G002239	darkred
BGI_novel_G002178	darkturquoise
CCA1250S0092	darkturquoise
CCA1315S0009	brown2
CCA1425S0015	firebrick4
CCA0929S0085	darkorange
CCA1391S0011	darkred
BGI_novel_G001824	darkturquoise
CCA1164S0024	darkred
CCA0859S0178	darkturquoise
CCA0674S0080	darkorange
CCA0623S0118	darkturquoise
CCA0701S0054	blue2
BGI_novel_G002005	darkred
CCA0795S0020	darkred
BGI_novel_G002909	darkturquoise
CCA1663S0005	blue2
CCA1577S0029	blue2
CCA1141S0021	darkred
CCA0779S0090	firebrick4
CCA1397S0001	darkred
CCA0500S0121	firebrick4
CCA0816S0036	darkturquoise
CCA1547S0015	firebrick4
CCA1194S0037	darkred
CCA0964S0074	blue2
CCA0816S0086	darkred
CCA1810S0004	brown2
BGI_novel_G001406	blue2
CCA0507S0248	firebrick4
CCA0686S0066	darkred
CCA1550S0001	blue2
CCA0539S0117	darkred
CCA1041S0079	firebrick4
BGI_novel_G000950	firebrick4
CCA0674S0177	darkred
CCA0642S0073	brown2
CCA0589S0001	darkred
CCA0929S0002	darkred
CCA0925S0072	darkred
CCA1120S0005	blue2
CCA0700S0121	darkred
CCA0929S0102	darkred
CCA0126S0006	darkred
CCA0838S0048	blue2
CCA1390S0023	firebrick4
CCA1357S0028	darkred
CCA1641S0002	darkred
CCA0981S0060	darkred
CCA0642S0013	darkturquoise
CCA0576S0008	blue2
BGI_novel_G002125	firebrick4
BGI_novel_G002304	blue2
CCA0576S0039	darkred
CCA0662S0117	blue2
CCA1633S0007	darkred
CCA1591S0029	firebrick4
CCA0925S0033	darkturquoise
CCA0659S0166	darkred
BGI_novel_G000444	darkturquoise
CCA1654S0004	darkred
CCA1495S0003	darkred
BGI_novel_G002259	darkturquoise
CCA1123S0093	darkred
CCA1074S0020	darkred
CCA1677S0004	darkred
BGI_novel_G001033	blue2
CCA1095S0013	darkred
CCA1164S0025	darkred
CCA0628S0059	darkred
CCA0813S0103	darkturquoise
CCA1594S0003	darkred
CCA0929S0076	darkturquoise
CCA0806S0097	darkred
CCA1141S0007	firebrick4
CCA0839S0147	darkred
CCA0698S0204	firebrick4
CCA0616S0116	brown2
CCA0763S0015	antiquewhite2
CCA0737S0092	firebrick4
CCA1561S0006	darkturquoise
CCA0848S0062	darkred
CCA0598S0069	darkred
BGI_novel_G001010	firebrick4
CCA1188S0023	firebrick4
CCA1094S0074	blue2
CCA0092S0002	pink4
BGI_novel_G002306	darkorange
CCA0736S0021	blue2
CCA1094S0019	firebrick4
CCA1495S0005	darkred
CCA0829S0072	firebrick4
CCA1154S0008	darkred
CCA0975S0113	blue2
CCA0507S0235	blue2
CCA0552S0267	firebrick4
CCA1547S0016	brown2
BGI_novel_G000373	brown2
CCA0610S0037	darkred
CCA0546S0062	darkred
CCA0546S0190	darkorange
CCA0500S0257	darkred
CCA0816S0018	darkred
CCA0582S0133	antiquewhite2
CCA0922S0005	blue2
CCA0929S0069	firebrick4
CCA0803S0018	darkred
CCA0520S0175	darkred
BGI_novel_G000291	darkred
CCA0535S0030	darkred
CCA0535S0031	darkred
CCA1147S0023	firebrick4
CCA0909S0048	blue2
CCA1005S0005	darkred
CCA1672S0013	darkred
CCA0605S0106	darkred
CCA1288S0034	darkred
CCA0533S0127	darkred
CCA1244S0045	darkturquoise
CCA0510S0181	darkred
CCA0555S0133	blue2
CCA0576S0164	brown2
CCA1363S0022	firebrick4
CCA0652S0001	darkturquoise
BGI_novel_G002830	firebrick4
CCA0935S0056	darkred
CCA1244S0042	darkred
CCA0708S0030	darkred
BGI_novel_G000393	firebrick4
BGI_novel_G001133	darkturquoise
CCA0576S0203	darkred
CCA0718S0139	darkred
CCA0674S0167	blue2
CCA0765S0103	darkred
CCA1107S0007	blue2
BGI_novel_G002143	blue2
BGI_novel_G002132	blue2
BGI_novel_G000712	brown2
CCA0961S0077	blue2
CCA0784S0108	darkred
CCA0500S0169	darkred
CCA1511S0015	darkturquoise
CCA0898S0102	darkred
CCA0897S0129	blue2
CCA0546S0059	darkred
CCA0925S0059	blue2
BGI_novel_G002398	blue2
CCA0765S0099	darkred
CCA0782S0120	darkred
CCA0905S0108	darkred
CCA0704S0137	darkorange
CCA1456S0007	darkturquoise
CCA0718S0026	blue2
CCA1287S0010	darkorange
CCA0633S0064	darkturquoise
CCA0539S0082	darkorange
BGI_novel_G002327	blue2
CCA0861S0005	darkred
CCA0799S0056	darkred
CCA1015S0107	firebrick4
CCA0964S0017	firebrick4
CCA1151S0051	darkred
CCA0944S0071	antiquewhite2
CCA1377S0025	darkturquoise
CCA1074S0038	pink4
CCA0654S0086	darkred
BGI_novel_G000318	firebrick4
CCA0806S0067	darkturquoise
CCA1287S0069	darkred
CCA0897S0124	darkturquoise
CCA1179S0032	darkred
BGI_novel_G002557	firebrick4
CCA0838S0097	brown2
CCA0595S0085	firebrick4
CCA0500S0216	darkred
CCA0884S0094	darkred
CCA1672S0015	firebrick4
BGI_novel_G002102	pink4
CCA1097S0040	firebrick4
BGI_novel_G001012	firebrick4
CCA0587S0059	darkred
CCA1039S0046	darkred
BGI_novel_G001380	darkred
BGI_novel_G002115	darkred
CCA1277S0044	firebrick4
CCA0899S0056	darkred
CCA1118S0045	darkred
CCA0546S0225	firebrick4
CCA1250S0059	brown2
BGI_novel_G001755	firebrick4
CCA0839S0095	darkred
CCA1579S0003	darkturquoise
BGI_novel_G001358	darkred
CCA0163S0003	darkturquoise
CCA0718S0105	firebrick4
CCA0662S0129	darkred
BGI_novel_G002072	blue2
CCA1312S0020	darkred
BGI_novel_G000768	darkred
CCA0975S0143	darkred
BGI_novel_G000238	brown2
CCA0862S0066	darkred
CCA0546S0157	brown2
CCA0526S0139	blue2
CCA0782S0119	darkred
CCA1073S0007	firebrick4
CCA0704S0032	darkred
CCA0982S0053	blue2
CCA0010S0001	darkturquoise
CCA0884S0070	darkred
CCA0555S0045	darkred
CCA1123S0087	darkred
CCA0907S0082	darkred
CCA0851S0123	darkred
BGI_novel_G000348	darkred
CCA1063S0019	darkturquoise
BGI_novel_G002528	brown2
CCA0704S0064	blue2
CCA0774S0029	darkred
CCA0164S0002	darkred
CCA0839S0130	firebrick4
CCA0929S0045	darkorange
CCA0906S0074	darkred
CCA1126S0025	darkred
CCA1324S0004	darkred
BGI_novel_G002121	darkturquoise
CCA0632S0183	firebrick4
BGI_novel_G002175	blue2
CCA1556S0022	darkred
CCA0674S0202	darkorange
CCA1140S0066	blue2
CCA1051S0002	darkorange
BGI_novel_G000211	darkorange
CCA1277S0011	darkred
CCA1123S0010	darkred
CCA0918S0191	darkred
CCA1537S0007	darkred
CCA0906S0095	darkred
CCA1288S0018	firebrick4
CCA0533S0118	darkred
CCA0566S0159	darkred
CCA0784S0097	firebrick4
CCA0733S0050	darkred
CCA1498S0053	blue2
CCA0632S0133	blue2
CCA1568S0015	darkred
CCA0857S0022	darkred
CCA1397S0021	brown2
CCA0555S0088	darkred
CCA0765S0081	pink4
CCA1704S0012	firebrick4
BGI_novel_G002614	blue2
CCA0907S0053	darkred
BGI_novel_G000808	firebrick4
CCA0566S0071	blue2
CCA0848S0113	blue2
CCA1739S0018	brown2
CCA0925S0070	darkturquoise
CCA0623S0002	darkturquoise
CCA0870S0013	pink4
BGI_novel_G000177	blue2
BGI_novel_G001428	darkturquoise
CCA1100S0010	darkred
CCA0859S0171	blue2
CCA0912S0027	darkred
CCA0576S0063	firebrick4
CCA1075S0028	brown2
BGI_novel_G001442	blue2
CCA1034S0041	firebrick4
CCA0513S0271	blue2
BGI_novel_G002699	darkred
CCA0983S0056	darkred
CCA1575S0032	darkred
CCA0646S0157	blue2
CCA0510S0089	darkred
CCA0782S0055	firebrick4
CCA0632S0063	blue2
CCA1164S0017	darkred
CCA0708S0105	firebrick4
CCA0897S0172	blue2
CCA0633S0072	blue2
CCA0737S0069	darkred
CCA1033S0027	darkred
CCA0679S0081	darkred
CCA0803S0069	darkred
CCA0784S0117	pink4
CCA0839S0029	brown2
BGI_novel_G000989	darkturquoise
CCA1364S0022	brown2
BGI_novel_G001492	darkred
BGI_novel_G001708	darkred
CCA1187S0025	firebrick4
CCA1033S0052	blue2
CCA1326S0048	firebrick4
CCA0918S0093	darkred
CCA0126S0007	antiquewhite2
BGI_novel_G001258	darkred
CCA0851S0168	firebrick4
CCA0106S0001	darkred
CCA0709S0095	darkred
CCA0918S0189	blue2
BGI_novel_G002851	blue2
CCA0884S0014	darkred
CCA0546S0304	firebrick4
CCA0010S0002	darkturquoise
CCA0627S0020	darkred
CCA0762S0026	brown2
CCA0806S0100	darkred
CCA0065S0006	darkred
CCA1027S0035	darkred
CCA1179S0006	darkred
CCA0936S0045	blue2
CCA0507S0291	blue2
BGI_novel_G000087	firebrick4
CCA1075S0014	darkred
CCA0573S0190	blue2
CCA1298S0021	firebrick4
CCA0638S0180	firebrick4
CCA1277S0012	pink4
CCA0839S0140	firebrick4
CCA0623S0098	firebrick4
CCA0718S0089	darkred
CCA0566S0108	darkred
CCA0510S0095	firebrick4
CCA0632S0006	darkturquoise
CCA0890S0040	darkred
CCA0678S0101	darkred
CCA1252S0011	darkred
CCA0565S0096	darkorange
CCA0799S0016	darkred
CCA0679S0117	darkred
CCA0754S0095	darkred
CCA0500S0229	darkred
BGI_novel_G000801	darkred
CCA0883S0018	darkred
CCA0565S0129	blue2
CCA0597S0006	darkturquoise
CCA0652S0104	darkred
CCA1705S0003	darkred
CCA1746S0011	firebrick4
CCA0526S0061	darkred
CCA0709S0091	darkred
CCA0632S0086	firebrick4
BGI_novel_G000154	darkorange
CCA1523S0001	darkred
CCA0819S0008	darkred
CCA0874S0025	firebrick4
CCA1326S0003	antiquewhite2
CCA1233S0023	darkturquoise
CCA0605S0033	darkred
CCA0676S0019	darkred
CCA0784S0172	brown2
CCA0800S0082	blue2
CCA0576S0152	darkred
CCA0559S0094	firebrick4
CCA0646S0130	blue2
CCA0892S0010	firebrick4
CCA0859S0024	blue2
CCA0800S0088	darkturquoise
CCA1029S0013	darkorange
CCA0957S0031	darkred
CCA0039S0015	brown2
CCA0843S0100	brown2
CCA1294S0002	darkred
CCA1075S0056	darkred
CCA0525S0080	firebrick4
CCA0782S0040	brown2
CCA0782S0053	firebrick4
CCA0924S0004	darkred
CCA0597S0052	darkred
BGI_novel_G001558	brown2
CCA0916S0019	firebrick4
CCA1151S0075	firebrick4
CCA1603S0012	firebrick4
CCA0678S0029	darkred
CCA0932S0027	darkred
CCA0877S0034	darkred
CCA0839S0076	blue2
BGI_novel_G001993	blue2
CCA0918S0052	darkred
CCA1002S0055	firebrick4
CCA1280S0002	darkred
BGI_novel_G001531	firebrick4
CCA1620S0031	firebrick4
BGI_novel_G000268	darkred
CCA1094S0110	firebrick4
CCA0799S0074	darkred
CCA0905S0102	darkturquoise
CCA1528S0024	brown2
CCA0524S0308	darkred
CCA0923S0058	firebrick4
CCA1046S0021	darkred
CCA0583S0048	darkred
CCA0605S0103	antiquewhite2
CCA1804S0002	darkturquoise
CCA1542S0004	darkturquoise
CCA0587S0020	darkred
CCA0894S0009	blue2
CCA1017S0022	darkturquoise
BGI_novel_G002482	antiquewhite2
CCA0838S0064	firebrick4
CCA1132S0010	firebrick4
CCA0659S0228	firebrick4
BGI_novel_G002145	blue2
CCA0958S0038	darkturquoise
BGI_novel_G001036	darkturquoise
CCA0513S0309	darkred
CCA1273S0016	darkred
BGI_novel_G000061	blue2
CCA0566S0121	darkred
CCA1041S0011	firebrick4
CCA1002S0091	blue2
BGI_novel_G001746	firebrick4
BGI_novel_G002453	blue2
CCA0638S0121	darkred
CCA1061S0017	darkred
CCA0535S0097	darkred
BGI_novel_G002066	darkred
CCA0524S0090	darkred
CCA0862S0136	darkred
CCA0520S0163	firebrick4
CCA0803S0094	blue2
CCA0979S0001	darkred
CCA0718S0025	firebrick4
CCA0522S0243	darkred
BGI_novel_G001747	firebrick4
CCA1731S0022	darkred
CCA0983S0048	darkred
CCA1509S0003	darkred
CCA1097S0050	firebrick4
CCA0983S0014	pink4
CCA1167S0027	firebrick4
CCA0597S0079	darkturquoise
CCA1379S0006	darkred
CCA0800S0135	darkred
CCA1154S0022	darkred
CCA1095S0004	firebrick4
CCA0700S0080	darkred
BGI_novel_G001017	darkred
CCA0520S0140	firebrick4
CCA0533S0064	darkred
CCA0535S0067	darkturquoise
CCA1357S0008	brown2
BGI_novel_G000992	darkturquoise
CCA0566S0063	darkred
CCA0514S0274	darkred
CCA0522S0226	firebrick4
CCA1604S0008	darkred
CCA0944S0061	darkturquoise
CCA0784S0027	blue2
BGI_novel_G000802	blue2
CCA0535S0046	darkred
BGI_novel_G002219	firebrick4
CCA0513S0184	darkred
CCA0754S0175	darkred
CCA0925S0081	darkred
CCA0583S0045	darkred
BGI_novel_G002643	firebrick4
CCA0765S0076	firebrick4
BGI_novel_G001075	darkturquoise
CCA0526S0237	darkorange
CCA0851S0162	darkturquoise
BGI_novel_G000376	pink4
CCA1459S0001	firebrick4
CCA0879S0104	firebrick4
CCA1620S0003	darkturquoise
BGI_novel_G002608	darkorange
CCA0514S0062	darkred
BGI_novel_G002226	darkturquoise
CCA1100S0021	darkturquoise
BGI_novel_G000422	darkred
CCA0709S0070	blue2
CCA0514S0136	darkred
CCA0813S0034	brown2
CCA0698S0164	blue2
CCA0587S0150	darkred
CCA1413S0006	antiquewhite2
CCA0941S0013	darkred
BGI_novel_G002595	darkred
BGI_novel_G002596	darkred
CCA0789S0016	firebrick4
CCA0762S0062	blue2
BGI_novel_G001363	darkred
CCA0876S0038	darkred
CCA0516S0144	blue2
CCA1161S0010	darkred
CCA0892S0014	darkred
CCA0513S0207	brown2
CCA0656S0023	firebrick4
BGI_novel_G002305	blue2
CCA0679S0111	darkred
CCA0704S0118	blue2
CCA0634S0040	brown2
CCA0623S0105	darkred
CCA0500S0213	firebrick4
CCA0763S0042	darkorange
BGI_novel_G001429	darkturquoise
CCA0679S0012	darkred
CCA0163S0007	darkturquoise
CCA1769S0011	darkred
CCA0555S0201	darkred
CCA0848S0092	darkred
CCA1312S0014	darkred
CCA0982S0014	brown2
CCA1560S0001	darkred
CCA1079S0065	darkred
CCA1451S0011	darkred
CCA1223S0018	darkturquoise
BGI_novel_G001347	firebrick4
CCA0859S0053	darkred
CCA0691S0023	pink4
CCA0674S0075	blue2
CCA0991S0032	darkred
CCA1379S0003	darkorange
BGI_novel_G001608	blue2
CCA0874S0045	blue2
CCA1144S0006	darkred
CCA1581S0011	darkred
CCA0898S0103	blue2
CCA0500S0205	firebrick4
CCA0516S0076	darkturquoise
CCA0555S0105	firebrick4
CCA0781S0041	darkred
CCA0533S0058	darkred
BGI_novel_G000347	darkturquoise
CCA1244S0043	darkred
CCA0500S0063	darkred
CCA1638S0006	blue2
CCA0549S0008	blue2
CCA0681S0034	firebrick4
CCA0696S0075	darkred
CCA0799S0111	firebrick4
CCA1334S0001	darkred
CCA0857S0055	darkred
CCA1041S0061	darkred
CCA1479S0028	darkred
BGI_novel_G002111	darkred
CCA0905S0107	darkred
CCA1637S0028	blue2
CCA0836S0042	brown2
CCA1737S0008	darkred
CCA0836S0007	darkred
CCA0861S0025	darkred
CCA1285S0037	darkred
CCA0514S0134	darkred
CCA0555S0209	brown2
CCA0899S0082	blue2
CCA1550S0024	darkred
CCA0526S0327	darkred
CCA0510S0126	antiquewhite2
CCA0700S0055	darkred
CCA0998S0010	blue2
CCA0977S0062	darkturquoise
CCA0918S0038	darkred
CCA0887S0061	darkred
CCA0566S0171	darkred
CCA0779S0186	darkred
CCA0849S0011	darkturquoise
BGI_novel_G000581	brown2
CCA0505S0271	brown2
BGI_novel_G000566	darkred
BGI_novel_G000567	darkred
CCA0522S0020	antiquewhite2
BGI_novel_G001071	blue2
BGI_novel_G001745	blue2
CCA1285S0029	blue2
CCA0884S0114	darkturquoise
CCA1500S0020	darkred
CCA1731S0021	darkred
BGI_novel_G002015	darkred
CCA1060S0022	darkred
CCA0782S0069	darkred
CCA1788S0002	darkred
CCA0582S0083	darkred
CCA0632S0097	blue2
CCA0757S0051	firebrick4
CCA1281S0009	pink4
CCA0001S0016	firebrick4
CCA0975S0011	darkred
CCA0595S0143	blue2
CCA0828S0090	darkred
CCA0733S0046	darkturquoise
CCA0887S0044	darkred
CCA0876S0079	darkred
CCA1340S0006	darkred
CCA0716S0062	darkred
CCA0918S0016	darkred
CCA0748S0051	firebrick4
CCA0507S0084	darkred
CCA0510S0065	blue2
CCA0502S0010	darkred
CCA0659S0205	brown2
CCA0716S0057	firebrick4
BGI_novel_G002479	darkturquoise
CCA1296S0014	darkred
CCA1063S0076	firebrick4
CCA0601S0036	darkred
CCA1593S0020	darkred
CCA0887S0024	darkred
CCA0733S0019	darkred
CCA0566S0142	firebrick4
CCA0708S0127	blue2
CCA0057S0001	firebrick4
BGI_novel_G001756	firebrick4
CCA1084S0051	darkred
CCA0784S0041	darkred
CCA0924S0013	firebrick4
CCA0816S0023	firebrick4
CCA0839S0074	antiquewhite2
CCA0949S0044	darkturquoise
CCA1084S0045	blue2
CCA1257S0013	darkred
CCA1279S0026	firebrick4
CCA0941S0026	darkred
BGI_novel_G002653	darkred
BGI_novel_G001825	darkturquoise
CCA0940S0050	darkred
CCA1123S0018	firebrick4
CCA0839S0067	darkorange
CCA0679S0118	darkred
BGI_novel_G002645	firebrick4
CCA0623S0078	darkred
CCA0623S0071	darkred
CCA0886S0037	darkred
CCA0522S0208	darkred
CCA0986S0037	darkred
CCA1410S0028	blue2
CCA0605S0016	darkred
CCA1147S0055	blue2
CCA0784S0022	firebrick4
CCA0576S0116	darkred
CCA1724S0001	firebrick4
CCA1605S0012	firebrick4
CCA1120S0036	darkred
CCA1268S0020	darkred
CCA0514S0088	darkred
CCA0839S0123	darkred
CCA0718S0084	darkred
CCA0522S0078	darkred
CCA1289S0006	firebrick4
CCA1390S0027	firebrick4
CCA0733S0066	darkred
CCA1094S0048	darkred
CCA1079S0062	darkred
CCA0632S0007	blue2
CCA0652S0118	darkturquoise
CCA0632S0168	firebrick4
CCA1005S0014	darkred
CCA1422S0027	darkred
BGI_novel_G001905	darkred
BGI_novel_G001395	firebrick4
BGI_novel_G002762	darkturquoise
CCA1581S0007	darkred
CCA0676S0008	firebrick4
CCA0791S0055	darkred
CCA0659S0255	darkred
CCA0704S0070	firebrick4
CCA0507S0310	darkred
CCA0681S0021	darkred
CCA0748S0001	darkred
BGI_novel_G001438	firebrick4
BGI_novel_G001095	darkred
CCA0813S0059	brown2
BGI_novel_G002355	firebrick4
CCA0587S0105	darkred
CCA0555S0256	darkred
CCA1199S0036	brown2
CCA0500S0295	firebrick4
CCA1599S0014	blue2
CCA1596S0013	darkred
CCA0505S0119	firebrick4
CCA1526S0007	darkred
CCA0970S0018	darkred
CCA1639S0006	darkturquoise
CCA0842S0006	blue2
CCA0513S0193	darkred
BGI_novel_G000048	darkturquoise
CCA0499S0001	blue2
CCA0721S0031	blue2
CCA1134S0046	blue2
BGI_novel_G000474	firebrick4
CCA1106S0051	darkred
CCA1074S0043	darkred
CCA0986S0004	firebrick4
CCA1673S0024	darkturquoise
BGI_novel_G001709	darkred
CCA1382S0002	darkturquoise
CCA0632S0146	firebrick4
CCA0674S0064	firebrick4
CCA0510S0182	firebrick4
CCA1075S0057	darkred
CCA1168S0017	darkred
CCA0849S0055	pink4
CCA0782S0093	darkred
BGI_novel_G000586	darkred
CCA1100S0035	brown2
BGI_novel_G000557	blue2
CCA0535S0052	darkred
CCA0070S0001	blue2
CCA0546S0273	firebrick4
CCA1261S0010	darkred
CCA0505S0088	firebrick4
CCA0887S0060	pink4
CCA1422S0005	blue2
CCA0709S0042	darkorange
CCA0679S0143	firebrick4
CCA0986S0065	darkturquoise
CCA0736S0027	darkred
CCA1591S0017	brown2
CCA0704S0009	salmon2
CCA0646S0110	blue2
CCA0906S0017	blue2
CCA0905S0133	darkred
CCA0749S0001	antiquewhite2
BGI_novel_G000406	darkorange
CCA0709S0094	blue2
BGI_novel_G002016	darkred
BGI_novel_G001297	blue2
CCA1251S0033	brown2
BGI_novel_G002117	darkred
CCA0884S0209	firebrick4
CCA0589S0076	darkorange
CCA0799S0065	firebrick4
CCA0638S0187	firebrick4
CCA0874S0017	firebrick4
CCA1559S0017	darkred
BGI_novel_G000530	antiquewhite2
CCA0642S0143	darkred
CCA0869S0031	darkred
CCA0678S0067	darkred
CCA0810S0103	brown2
CCA0704S0117	darkred
CCA1285S0028	blue2
BGI_novel_G002370	brown2
CCA0876S0062	firebrick4
CCA1257S0015	darkred
CCA1409S0019	darkred
CCA0754S0020	darkturquoise
BGI_novel_G001491	firebrick4
CCA0539S0204	darkred
CCA1348S0037	firebrick4
CCA0680S0089	pink4
CCA0500S0224	firebrick4
CCA1135S0030	darkred
CCA0587S0015	firebrick4
CCA0589S0127	darkred
CCA1151S0045	darkred
CCA0876S0029	blue2
CCA0822S0026	darkred
CCA0513S0341	darkred
CCA0854S0106	darkred
CCA0533S0095	darkred
CCA0708S0004	firebrick4
CCA0041S0007	blue2
CCA0975S0102	darkred
BGI_novel_G002384	blue2
CCA0789S0129	darkred
BGI_novel_G001034	darkturquoise
CCA1094S0061	darkorange
CCA1525S0001	darkred
CCA0907S0071	darkred
CCA1637S0018	antiquewhite2
CCA0816S0119	firebrick4
CCA0743S0063	blue2
CCA0879S0062	darkturquoise
CCA1498S0001	darkturquoise
CCA0991S0088	firebrick4
CCA0782S0027	brown2
CCA1329S0001	darkred
CCA0912S0105	firebrick4
CCA0836S0025	darkred
CCA0829S0047	darkred
CCA0944S0052	darkturquoise
BGI_novel_G002269	blue2
CCA0522S0192	blue2
CCA0982S0023	darkred
BGI_novel_G002917	darkturquoise
CCA0806S0033	darkred
CCA0649S0069	blue2
CCA1288S0076	darkturquoise
CCA0838S0099	brown2
CCA0836S0108	darkred
CCA1197S0007	firebrick4
CCA0103S0001	firebrick4
CCA0646S0112	blue2
CCA0737S0041	darkred
CCA0800S0024	darkred
CCA0698S0237	firebrick4
CCA0879S0083	pink4
CCA1279S0005	darkred
CCA0982S0027	blue2
BGI_novel_G000425	brown2
CCA0552S0193	firebrick4
CCA0659S0239	darkred
BGI_novel_G002788	darkred
BGI_novel_G000893	firebrick4
CCA1422S0015	darkred
CCA1203S0018	darkred
CCA0743S0062	blue2
CCA0782S0162	blue2
CCA0549S0021	darkred
CCA0500S0238	blue2
CCA1594S0014	darkturquoise
CCA1111S0025	firebrick4
BGI_novel_G002664	darkred
CCA1126S0080	darkred
CCA0514S0177	firebrick4
CCA1413S0020	darkred
CCA0906S0064	pink4
CCA0743S0058	darkred
BGI_novel_G002654	darkturquoise
CCA1288S0008	firebrick4
BGI_novel_G000862	pink4
CCA0708S0129	blue2
CCA1575S0015	darkred
CCA0505S0138	blue2
CCA1016S0012	darkred
BGI_novel_G000511	firebrick4
CCA0525S0160	blue2
CCA0854S0087	darkturquoise
CCA0680S0069	blue2
CCA1473S0002	firebrick4
CCA1228S0026	darkred
CCA1363S0054	darkturquoise
CCA0958S0030	firebrick4
CCA0598S0079	firebrick4
CCA0779S0032	darkred
CCA0718S0156	darkturquoise
CCA0524S0058	darkred
CCA0513S0141	firebrick4
CCA0694S0081	firebrick4
CCA0704S0016	darkred
CCA0716S0006	darkred
CCA1024S0031	darkred
BGI_novel_G002368	brown2
CCA1381S0056	darkturquoise
CCA0881S0010	darkred
CCA0513S0138	darkred
CCA1015S0003	firebrick4
CCA0828S0065	darkturquoise
CCA1106S0033	darkred
BGI_novel_G002829	blue2
CCA1357S0006	darkred
CCA0990S0008	darkred
CCA1051S0078	darkturquoise
CCA0754S0025	darkred
CCA1126S0052	darkred
BGI_novel_G001702	darkred
CCA0935S0039	blue2
CCA0623S0149	firebrick4
CCA0539S0243	darkred
BGI_novel_G001932	darkturquoise
CCA0642S0057	darkred
CCA0587S0193	firebrick4
CCA0507S0127	darkred
CCA0526S0323	darkturquoise
CCA0591S0121	firebrick4
CCA0591S0090	firebrick4
CCA0632S0057	darkred
CCA0729S0004	brown2
CCA0905S0029	darkred
CCA0983S0059	brown2
BGI_novel_G002318	brown2
CCA0623S0119	darkred
CCA0861S0024	darkred
CCA0526S0285	firebrick4
CCA0733S0038	darkred
CCA0240S0003	darkred
CCA1015S0038	darkred
CCA1203S0012	darkred
CCA1287S0055	pink4
BGI_novel_G001439	darkred
CCA0961S0015	firebrick4
BGI_novel_G000315	firebrick4
CCA0839S0041	darkred
CCA0573S0137	darkred
CCA0743S0049	darkred
CCA0582S0079	darkred
CCA1285S0042	darkred
CCA0552S0013	darkred
BGI_novel_G000516	darkorange
CCA0894S0010	darkturquoise
CCA0828S0029	darkred
CCA1179S0028	darkred
CCA0507S0293	darkturquoise
CCA1052S0025	darkturquoise
CCA0977S0025	darkturquoise
CCA0507S0029	antiquewhite2
[truncated: 8,434 more rows]
