# Supplementary material for: Global Transcriptome Analysis Revealed the Molecular Regulation Mechanism of Pigment and Reactive Oxygen Species Metabolism During the Stigma Development of Carya cathayensis
Source: Front Plant Sci. 2022 May 9;13:881394. doi: 10.3389/fpls.2022.881394 (PMC9125253; doi:10.3389/fpls.2022.881394)
Supplement: Supplementary file 9 [file Table_8.XLSX]

## Sheet: Sheet1
Supplementary Table 8 pigment ralated genes in the four hub module
Gene ID	Family	Gene name	module
CCA0500S0307	anthocyanin	4CL	darkturquoise
CCA0662S0022	anthocyanin	4CL	darkturquoise
CCA0708S0027	anthocyanin	4CL	darkred
CCA0765S0035	anthocyanin	4CL	firebrick4
CCA0881S0026	anthocyanin	4CL	darkred
CCA1095S0094	anthocyanin	4CL	firebrick4
CCA1113S0014	anthocyanin	4CL	darkturquoise
CCA1285S0013	anthocyanin	4CL	darkturquoise
CCA1526S0019	anthocyanin	4CL	darkturquoise
CCA0535S0121	anthocyanin	EGL3/TT8	antiquewhite2
CCA0724S0020	anthocyanin	EGL3/MYC1/TT8	darkred
CCA0884S0019	anthocyanin	TT1	darkorange
CCA1519S0048	anthocyanin	TT1	pink4
CCA0924S0001	anthocyanin	TT19	firebrick4
CCA0500S0229	anthocyanin	AHA10	darkred
CCA0633S0027	anthocyanin	AHA10	darkturquoise
CCA0674S0022	anthocyanin	AHA10	darkturquoise
CCA0754S0164	anthocyanin	AHA10	darkred
CCA0754S0165	anthocyanin	AHA10	darkred
CCA0851S0056	anthocyanin	AHA10	darkturquoise
CCA1094S0120	anthocyanin	AHA10	brown2
CCA1277S0035	anthocyanin	AHA10	darkturquoise
CCA0539S0005	anthocyanin	TT12	darkred
CCA0539S0006	anthocyanin	TT12	pink4
CCA0566S0184	anthocyanin	TT12	darkturquoise
CCA0705S0007	anthocyanin	TT12	darkred
CCA0705S0011	anthocyanin	TT12	darkred
CCA0705S0015	anthocyanin	TT12	darkred
CCA0782S0027	anthocyanin	TT12	brown2
CCA0813S0024	anthocyanin	TT12	darkred
CCA0857S0026	anthocyanin	TT12	firebrick4
CCA1071S0027	anthocyanin	TT12	antiquewhite2
CCA1223S0020	anthocyanin	TT12	brown2
CCA1310S0016	anthocyanin	TT12	darkred
CCA1381S0014	anthocyanin	TT12	antiquewhite2
CCA1410S0015	anthocyanin	TT12	darkturquoise
CCA1441S0004	anthocyanin	TT12	firebrick4
CCA1528S0031	anthocyanin	TT12	darkred
CCA1540S0009	anthocyanin	TT12	darkturquoise
CCA1606S0005	anthocyanin	TT12	darkred
CCA1653S0005	anthocyanin	TT12	darkorange
CCA0559S0106	anthocyanin	MRP1	firebrick4
CCA0646S0175	anthocyanin	MRP1	brown2
CCA0678S0013	anthocyanin	MRP1	darkturquoise
CCA0678S0204	anthocyanin	MRP1	darkred
CCA0799S0028	anthocyanin	MRP1	darkorange
CCA0834S0045	anthocyanin	MRP1	darkturquoise
CCA0848S0029	anthocyanin	MRP1	firebrick4
CCA1051S0047	anthocyanin	MRP1	darkturquoise
CCA1094S0100	anthocyanin	MRP1	darkturquoise
CCA1257S0067	anthocyanin	MRP1	darkturquoise
CCA1731S0010	anthocyanin	MRP1	firebrick4
CCA0559S0106	anthocyanin	MRP2	firebrick4
CCA0646S0175	anthocyanin	MRP2	brown2
CCA0678S0013	anthocyanin	MRP2	darkturquoise
CCA0678S0204	anthocyanin	MRP2	darkred
CCA0799S0028	anthocyanin	MRP2	darkorange
CCA0834S0045	anthocyanin	MRP2	darkturquoise
CCA0848S0029	anthocyanin	MRP2	firebrick4
CCA1051S0047	anthocyanin	MRP2	darkturquoise
CCA1055S0071	anthocyanin	MRP2	firebrick4
CCA1257S0067	anthocyanin	MRP2	darkturquoise
CCA1731S0010	anthocyanin	MRP2	firebrick4
CCA0559S0106	anthocyanin	MRP3	firebrick4
CCA0646S0175	anthocyanin	MRP3	brown2
CCA0678S0013	anthocyanin	MRP3	darkturquoise
CCA0678S0204	anthocyanin	MRP3	darkred
CCA0799S0028	anthocyanin	MRP3	darkorange
CCA0834S0045	anthocyanin	MRP3	darkturquoise
CCA0848S0029	anthocyanin	MRP3	firebrick4
CCA0886S0003	anthocyanin	MRP3	darkturquoise
CCA1051S0047	anthocyanin	MRP3	darkturquoise
CCA1055S0071	anthocyanin	MRP3	firebrick4
CCA1257S0067	anthocyanin	MRP3	darkturquoise
CCA1731S0010	anthocyanin	MRP3	firebrick4
CCA0526S0313	anthocyanin	MYB11/12/111	darkred
CCA0691S0036	anthocyanin	MYB11/12/111	darkred
CCA0887S0029	anthocyanin	PAP2(MYB90)	firebrick4
CCA0887S0030	anthocyanin	PAP1(MYB75)/PAP2(MYB90)/MYB113/114	darkred
CCA0918S0126	anthocyanin	MYB11/12/111	firebrick4
CCA1382S0024	anthocyanin	TT2(MYB123)	pink4
CCA0500S0118	anthocyanin	UGT	salmon2
CCA0500S0121	anthocyanin	UGT	firebrick4
CCA0555S0045	anthocyanin	UGT	darkred
CCA0559S0118	anthocyanin	UGT	darkred
CCA0559S0120	anthocyanin	UGT	firebrick4
CCA0582S0097	anthocyanin	UGT	darkred
CCA0591S0114	anthocyanin	UGT	darkturquoise
CCA0591S0121	anthocyanin	UGT	firebrick4
CCA0616S0065	anthocyanin	UGT	firebrick4
CCA0670S0123	anthocyanin	UGT	firebrick4
CCA0718S0065	anthocyanin	UGT	darkturquoise
CCA0736S0021	anthocyanin	UGT	blue2
CCA0869S0052	anthocyanin	UGT	darkred
CCA0879S0073	anthocyanin	UGT	darkred
CCA0884S0114	anthocyanin	UGT	darkturquoise
CCA0884S0119	anthocyanin	UGT	brown2
CCA0929S0055	anthocyanin	UGT	pink4
CCA0929S0057	anthocyanin	UGT	darkturquoise
CCA0958S0005	anthocyanin	UGT	darkred
CCA0958S0006	anthocyanin	UGT	firebrick4
CCA0958S0007	anthocyanin	UGT	firebrick4
CCA0991S0014	anthocyanin	UGT	firebrick4
CCA0991S0015	anthocyanin	UGT	firebrick4
CCA1068S0012	anthocyanin	UGT	darkred
CCA1094S0055	anthocyanin	UGT	antiquewhite2
CCA1151S0045	anthocyanin	UGT	darkred
CCA1194S0040	anthocyanin	UGT	darkorange
CCA1197S0007	anthocyanin	UGT	firebrick4
CCA1326S0044	anthocyanin	UGT	firebrick4
CCA1326S0048	anthocyanin	UGT	firebrick4
CCA1805S0002	anthocyanin	UGT	darkturquoise
CCA0555S0098	anthocyanin	TTG1	darkorange
CCA0546S0150	anthocyanin	PAL1/2/3/4	darkturquoise
CCA0589S0229	anthocyanin	PAL1/2/3/4	darkturquoise
CCA1013S0012	anthocyanin	PAL1/2/3/4	darkturquoise
CCA1591S0016	anthocyanin	PAL1/2/3/4	brown2
CCA1591S0017	anthocyanin	PAL1/2/3/4	brown2
CCA1250S0092	anthocyanin	CHS（TT4）	darkturquoise
CCA0522S0210	anthocyanin	DFR(TT3)	darkturquoise
CCA0526S0158	anthocyanin	DFR(TT3)	darkturquoise
CCA0546S0039	anthocyanin	DFR(TT3)	darkturquoise
CCA0589S0052	anthocyanin	DFR(TT3)	darkturquoise
CCA0642S0112	anthocyanin	DFR(TT3)	firebrick4
CCA0006S0007	anthocyanin	ANS（LDOX/TT18)	darkred
CCA0542S0025	anthocyanin	ANS（LDOX/TT18)	firebrick4
CCA0559S0149	anthocyanin	ANS（LDOX/TT18)	darkred
CCA0587S0097	anthocyanin	ANS（LDOX/TT18)	darkred
CCA0638S0198	anthocyanin	ANS（LDOX/TT18)	darkred
CCA0662S0076	anthocyanin	ANS（LDOX/TT18)	firebrick4
CCA0662S0078	anthocyanin	ANS（LDOX/TT18)	darkturquoise
CCA0676S0075	anthocyanin	ANS（LDOX/TT18)	blue2
CCA0680S0065	anthocyanin	ANS（LDOX/TT18)	pink4
CCA1511S0003	anthocyanin	ANS（LDOX/TT18)	blue2
CCA0006S0007	anthocyanin	FLS	darkred
CCA0542S0025	anthocyanin	FLS1	firebrick4
CCA0587S0097	anthocyanin	FLS1	darkred
CCA0607S0027	anthocyanin	FLS1	darkturquoise
CCA0638S0198	anthocyanin	FLS1/2/3/4/5/6	darkred
CCA0676S0075	anthocyanin	FLS1	blue2
CCA0680S0065	anthocyanin	FLS1	pink4
CCA0881S0115	anthocyanin	FLS1	blue2
CCA0918S0074	anthocyanin	FLS1	antiquewhite2
CCA0047S0001	anthocyanin	F3'5'H	firebrick4
CCA0470S0001	anthocyanin	F3'5'H	darkturquoise
CCA0500S0295	anthocyanin	F3'5'H	firebrick4
CCA0505S0060	anthocyanin	F3'5'H	darkturquoise
CCA0507S0050	anthocyanin	F3'5'H	darkturquoise
CCA0522S0106	anthocyanin	F3'5'H	darkturquoise
CCA0524S0150	anthocyanin	F3'5'H	darkturquoise
CCA0529S0059	anthocyanin	F3'5'H	darkturquoise
CCA0533S0086	anthocyanin	F3'5'H	firebrick4
CCA0533S0095	anthocyanin	F3'5'H	darkred
CCA0533S0151	anthocyanin	F3'5'H	darkturquoise
CCA0533S0254	anthocyanin	F3'5'H	darkturquoise
CCA0552S0027	anthocyanin	F3'5'H	darkturquoise
CCA0552S0041	anthocyanin	F3'5'H	firebrick4
CCA0552S0054	anthocyanin	F3'5'H	darkturquoise
CCA0552S0055	anthocyanin	F3'5'H	darkred
CCA0552S0057	anthocyanin	F3'5'H	darkred
CCA0552S0063	anthocyanin	F3'5'H	darkred
CCA0552S0064	anthocyanin	F3'5'H	darkred
CCA0555S0245	anthocyanin	F3'5'H	darkred
CCA0559S0163	anthocyanin	F3'5'H	firebrick4
CCA0589S0109	anthocyanin	F3'5'H	brown2
CCA0598S0059	anthocyanin	F3'5'H	antiquewhite2
CCA0616S0021	anthocyanin	F3'5'H	darkturquoise
CCA0633S0036	anthocyanin	F3'5'H	antiquewhite2
CCA0634S0117	anthocyanin	F3'5'H	darkturquoise
CCA0659S0255	anthocyanin	F3'5'H	darkred
CCA0662S0036	anthocyanin	F3'5'H	darkred
CCA0662S0037	anthocyanin	F3'5'H	firebrick4
CCA0691S0117	anthocyanin	F3'5'H	darkturquoise
CCA0709S0057	anthocyanin	F3'5'H	darkred
CCA0721S0015	anthocyanin	F3'5'H	darkturquoise
CCA0733S0116	anthocyanin	F3'5'H	darkturquoise
CCA0743S0031	anthocyanin	F3'5'H	darkturquoise
CCA0754S0107	anthocyanin	F3'5'H	brown2
CCA0806S0019	anthocyanin	F3'5'H	darkred
CCA0806S0024	anthocyanin	F3'5'H	antiquewhite2
CCA0806S0026	anthocyanin	F3'5'H	blue2
CCA0810S0020	anthocyanin	F3'5'H	firebrick4
CCA0810S0022	anthocyanin	F3'5'H	darkred
CCA0810S0026	anthocyanin	F3'5'H	darkred
CCA0828S0048	anthocyanin	F3'5'H	darkturquoise
CCA0905S0011	anthocyanin	F3'5'H	darkorange
CCA0957S0009	anthocyanin	F3'5'H	darkred
CCA0957S0012	anthocyanin	F3'5'H	darkred
CCA0957S0013	anthocyanin	F3'5'H	darkturquoise
CCA0973S0053	anthocyanin	F3'5'H	pink4
CCA0977S0012	anthocyanin	F3'5'H	darkturquoise
CCA0986S0081	anthocyanin	F3'5'H	darkturquoise
CCA0986S0082	anthocyanin	F3'5'H	pink4
CCA0991S0050	anthocyanin	F3'5'H	darkturquoise
CCA1027S0067	anthocyanin	F3'5'H	darkturquoise
CCA1130S0036	anthocyanin	F3'5'H	darkturquoise
CCA1132S0023	anthocyanin	F3'5'H	darkturquoise
CCA1379S0003	anthocyanin	F3'5'H	darkorange
CCA1482S0012	anthocyanin	F3'5'H	pink4
CCA1509S0003	anthocyanin	F3'5'H	darkred
CCA1519S0029	anthocyanin	F3'5'H	darkturquoise
CCA1560S0007	anthocyanin	F3'5'H	darkturquoise
CCA1707S0001	anthocyanin	F3'5'H	darkturquoise
CCA0607S0027	anthocyanin	F3H(TT6)	darkturquoise
CCA0676S0075	anthocyanin	F3H(TT6)	blue2
CCA0680S0065	anthocyanin	F3H(TT6)	pink4
CCA0881S0115	anthocyanin	F3H(TT6)	blue2
CCA0918S0074	anthocyanin	F3H(TT6)	antiquewhite2
CCA0047S0001	anthocyanin	F3'H(TT7)	firebrick4
CCA0470S0001	anthocyanin	F3'H(TT7)	darkturquoise
CCA0500S0295	anthocyanin	F3'H(TT7)	firebrick4
CCA0505S0060	anthocyanin	F3'H(TT7)	darkturquoise
CCA0507S0050	anthocyanin	F3'H(TT7)	darkturquoise
CCA0522S0106	anthocyanin	F3'H(TT7)	darkturquoise
CCA0524S0150	anthocyanin	F3'H(TT7)	darkturquoise
CCA0529S0059	anthocyanin	F3'H(TT7)	darkturquoise
CCA0533S0086	anthocyanin	F3'H(TT7)	firebrick4
CCA0533S0095	anthocyanin	F3'H(TT7)	darkred
CCA0533S0151	anthocyanin	F3'H(TT7)	darkturquoise
CCA0533S0254	anthocyanin	F3'H(TT7)	darkturquoise
CCA0552S0027	anthocyanin	F3'H(TT7)	darkturquoise
CCA0552S0041	anthocyanin	F3'H(TT7)	firebrick4
CCA0552S0054	anthocyanin	F3'H(TT7)	darkturquoise
CCA0552S0055	anthocyanin	F3'H(TT7)	darkred
CCA0552S0057	anthocyanin	F3'H(TT7)	darkred
CCA0552S0063	anthocyanin	F3'H(TT7)	darkred
CCA0552S0064	anthocyanin	F3'H(TT7)	darkred
CCA0555S0245	anthocyanin	F3'H(TT7)	darkred
CCA0559S0163	anthocyanin	F3'H(TT7)	firebrick4
CCA0589S0109	anthocyanin	F3'H(TT7)	brown2
CCA0598S0059	anthocyanin	F3'H(TT7)	antiquewhite2
CCA0616S0021	anthocyanin	F3'H(TT7)	darkturquoise
CCA0633S0036	anthocyanin	F3'H(TT7)	antiquewhite2
CCA0634S0117	anthocyanin	F3'H(TT7)	darkturquoise
CCA0659S0255	anthocyanin	F3'H(TT7)	darkred
CCA0662S0036	anthocyanin	F3'H(TT7)	darkred
CCA0662S0037	anthocyanin	F3'H(TT7)	firebrick4
CCA0691S0117	anthocyanin	F3'H(TT7)	darkturquoise
CCA0709S0057	anthocyanin	F3'H(TT7)	darkred
CCA0721S0015	anthocyanin	F3'H(TT7)	darkturquoise
CCA0733S0116	anthocyanin	F3'H(TT7)	darkturquoise
CCA0743S0031	anthocyanin	F3'H(TT7)	darkturquoise
CCA0754S0107	anthocyanin	F3'H(TT7)	brown2
CCA0806S0019	anthocyanin	F3'H(TT7)	darkred
CCA0806S0024	anthocyanin	F3'H(TT7)	antiquewhite2
CCA0806S0026	anthocyanin	F3'H(TT7)	blue2
CCA0810S0020	anthocyanin	F3'H(TT7)	firebrick4
CCA0810S0022	anthocyanin	F3'H(TT7)	darkred
CCA0810S0026	anthocyanin	F3'H(TT7)	darkred
CCA0828S0048	anthocyanin	F3'H(TT7)	darkturquoise
CCA0905S0011	anthocyanin	F3'H(TT7)	darkorange
CCA0957S0009	anthocyanin	F3'H(TT7)	darkred
CCA0957S0012	anthocyanin	F3'H(TT7)	darkred
CCA0957S0013	anthocyanin	F3'H(TT7)	darkturquoise
CCA0973S0053	anthocyanin	F3'H(TT7)	pink4
CCA0977S0012	anthocyanin	F3'H(TT7)	darkturquoise
CCA0986S0081	anthocyanin	F3'H(TT7)	darkturquoise
CCA0986S0082	anthocyanin	F3'H(TT7)	pink4
CCA0991S0050	anthocyanin	F3'H(TT7)	darkturquoise
CCA1027S0067	anthocyanin	F3'H(TT7)	darkturquoise
CCA1130S0036	anthocyanin	F3'H(TT7)	darkturquoise
CCA1132S0023	anthocyanin	F3'H(TT7)	darkturquoise
CCA1379S0003	anthocyanin	F3'H(TT7)	darkorange
CCA1482S0012	anthocyanin	F3'H(TT7)	pink4
CCA1509S0003	anthocyanin	F3'H(TT7)	darkred
CCA1519S0029	anthocyanin	F3'H(TT7)	darkturquoise
CCA1560S0007	anthocyanin	F3'H(TT7)	darkturquoise
CCA1707S0011	anthocyanin	F3'H(TT7)	darkturquoise
CCA1707S0014	anthocyanin	F3'H(TT7)	darkturquoise
CCA0555S0045	anthocyanin	UF3GT	darkred
CCA0958S0005	anthocyanin	UF3GT	darkred
CCA0958S0006	anthocyanin	UF3GT	firebrick4
CCA0958S0007	anthocyanin	UF3GT	firebrick4
CCA1068S0012	anthocyanin	UF3GT	darkred
CCA0500S0295	anthocyanin	C4H	firebrick4
CCA0505S0060	anthocyanin	C4H	darkturquoise
CCA0507S0050	anthocyanin	C4H	darkturquoise
CCA0522S0106	anthocyanin	C4H	darkturquoise
CCA0524S0150	anthocyanin	C4H	darkturquoise
CCA0529S0059	anthocyanin	C4H	darkturquoise
CCA0533S0151	anthocyanin	C4H	darkturquoise
CCA0533S0254	anthocyanin	C4H	darkturquoise
CCA0552S0041	anthocyanin	C4H	firebrick4
CCA0552S0064	anthocyanin	C4H	darkred
CCA0691S0117	anthocyanin	C4H	darkturquoise
CCA0709S0057	anthocyanin	C4H	darkred
CCA0721S0015	anthocyanin	C4H	darkturquoise
CCA0743S0031	anthocyanin	C4H	darkturquoise
CCA0754S0107	anthocyanin	C4H	brown2
CCA0810S0026	anthocyanin	C4H	darkred
CCA0828S0048	anthocyanin	C4H	darkturquoise
CCA0851S0183	anthocyanin	C4H	darkred
CCA0905S0011	anthocyanin	C4H	darkorange
CCA0957S0012	anthocyanin	C4H	darkred
CCA0957S0013	anthocyanin	C4H	darkturquoise
CCA0977S0012	anthocyanin	C4H	darkturquoise
CCA1027S0067	anthocyanin	C4H	darkturquoise
CCA1130S0036	anthocyanin	C4H	darkturquoise
CCA1379S0003	anthocyanin	C4H	darkorange
CCA1482S0012	anthocyanin	C4H	pink4
CCA0887S0096	carotenoids	PSY	darkred
CCA1229S0002	carotenoids	PSY	darkred
CCA0989S0028	carotenoids	HDS	firebrick4
CCA1187S0024	carotenoids	HDS	pink4
CCA0259S0002	carotenoids	DXR	darkturquoise
CCA0664S0001	carotenoids	DXS1/2	firebrick4
CCA0879S0081	carotenoids	DXS1/2	firebrick4
CCA0975S0037	carotenoids	DXS1/2	firebrick4
CCA1769S0023	carotenoids	DXS1/2	darkred
CCA0659S0070	carotenoids	HDR	blue2
CCA0597S0058	carotenoids	NCED	brown2
CCA0616S0116	carotenoids	NCED	brown2
CCA0899S0019	carotenoids	NCED	brown2
CCA1016S0002	carotenoids	NCED	brown2
CCA1406S0006	carotenoids	NCED	darkorange
CCA0831S0026	carotenoids	ZDS	darkred
CCA0831S0026	carotenoids	PDS3	darkred
CCA1188S0007	carotenoids	LCYB	darkturquoise
CCA0514S0096	carotenoids	LCYE/LUT2	darkred
CCA1033S0054	carotenoids	LCYE/LUT2	salmon2
CCA1052S0044	carotenoids	LCYE/LUT2	darkred
CCA0789S0066	carotenoids	LUT5	darkred
CCA1151S0050	carotenoids	LUT5	pink4
CCA0789S0066	carotenoids	LUT1	darkred
CCA1151S0050	carotenoids	LUT1	pink4
CCA0514S0096	carotenoids	DcCCS	darkred
CCA1052S0044	carotenoids	DcCCS	darkred
CCA0597S0058	carotenoids	CCD1/4	brown2
CCA0616S0116	carotenoids	CCD1/4	brown2
CCA0899S0019	carotenoids	CCD1/4	brown2
CCA1016S0002	carotenoids	CCD1/4	brown2
CCA1406S0006	carotenoids	CCD1/4	darkorange
CCA0539S0265	carotenoids	GGPS	darkturquoise
CCA0595S0039	carotenoids	IPI	firebrick4
CCA0774S0022	carotenoids	ZEP	darkred
CCA0975S0060	chlorophyll	DVR	darkred
CCA0539S0135	chlorophyll	CHLD	darkred
CCA0632S0071	chlorophyll	CHLD	darkred
CCA0862S0116	chlorophyll	CHLH	darkred
CCA0539S0135	chlorophyll	CHLI1/2	darkred
CCA0566S0020	chlorophyll	CHLI1/2	darkred
CCA0632S0071	chlorophyll	CHLI1/2	darkred
CCA0694S0099	chlorophyll	CRD1(ACSF)	darkred
CCA0737S0024	chlorophyll	HEMC	darkred
CCA0708S0071	chlorophyll	HEMA1/2/3	darkred
CCA0718S0099	chlorophyll	HEMA1/2/3	blue2
CCA0953S0097	chlorophyll	HEMA1/2/3	darkred
CCA0481S0003	chlorophyll	HEME1/2	firebrick4
CCA0576S0246	chlorophyll	HEME1/2	darkred
CCA0676S0015	chlorophyll	HEME1/2	darkred
CCA1503S0015	chlorophyll	HEME1/2	darkred
CCA0616S0014	chlorophyll	PAO/ACD1	darkturquoise
CCA0774S0017	chlorophyll	FCC/ACD2	firebrick4
CCA0859S0111	chlorophyll	CRN1	antiquewhite2
CCA1498S0035	chlorophyll	CRN1	darkturquoise
CCA0522S0211	chlorophyll	NOL, NYC1	antiquewhite2
CCA1413S0006	chlorophyll	NOL, NYC1	antiquewhite2
CCA0587S0082	chlorophyll	CHLG	darkturquoise
CCA0700S0013	chlorophyll	CHLG	darkred
CCA0500S0074	chlorophyll	CLH1/2	firebrick4
CCA0789S0082	chlorophyll	CLH1/2	brown2
CCA0803S0014	chlorophyll	CAO(CHL)	darkturquoise
CCA1377S0020	chlorophyll	CAO(CHL)	darkred
CCA0576S0111	chlorophyll	PORA/B/C	darkred
CCA0782S0001	chlorophyll	NYE1/2	darkturquoise
