# Supplementary material for: Global Transcriptome Analysis Revealed the Molecular Regulation Mechanism of Pigment and Reactive Oxygen Species Metabolism During the Stigma Development of Carya cathayensis
Source: Front Plant Sci. 2022 May 9;13:881394. doi: 10.3389/fpls.2022.881394 (PMC9125253; doi:10.3389/fpls.2022.881394)
Supplement: Supplementary file 10 [file Table_9.XLSX]

## Sheet: Sheet1
Supplementary table 9 GO pathway enrichment analysis of the module genes
Cluster	ID	Description	GeneRatio	BgRatio	pvalue	p.adjust	qvalue	geneID	Count
brown2	GO:0016702	oxidoreductase activity, acting on single donors with incorporation of molecular oxygen, incorporation of two atoms of oxygen	8/353	70/27535	3.19e-06	0.00250102	0.0023107	CCA0597S0057/CCA0597S0058/CCA0616S0116/CCA0899S0019/CCA1016S0002/CCA1373S0004/CCA1710S0003/CCA1714S0001	8
brown2	GO:0016701	oxidoreductase activity, acting on single donors with incorporation of molecular oxygen	8/353	93/27535	2.66e-05	0.0104495	0.00965428	CCA0597S0057/CCA0597S0058/CCA0616S0116/CCA0899S0019/CCA1016S0002/CCA1373S0004/CCA1710S0003/CCA1714S0001	8
brown2	GO:0022804	active transmembrane transporter activity	18/353	484/27535	6.17e-05	0.0161332	0.0149055	BGI_novel_G002153/BGI_novel_G002154/CCA0525S0037/CCA0525S0038/CCA0535S0082/CCA0646S0175/CCA0665S0011/CCA0782S0027/CCA0786S0045/CCA0894S0021/CCA0905S0117/CCA1082S0016/CCA1094S0120/CCA1223S0020/CCA1228S0002/CCA1273S0042/CCA1273S0046/CCA1503S0013	18
darkorange	GO:0000272	polysaccharide catabolic process	7/177	157/27535	7.3e-05	0.0328498	0.0324272	BGI_novel_G002312/CCA0679S0094/CCA0686S0036/CCA0918S0170/CCA1051S0002/CCA1073S0005/CCA1089S0027	7
darkred	GO:0015979	photosynthesis	52/2548	139/27535	1.86e-19	3.53e-16	2.99e-16	BGI_novel_G000488/BGI_novel_G000546/BGI_novel_G000786/CCA0063S0003/CCA0065S0006/CCA0383S0001/CCA0507S0127/CCA0525S0162/CCA0539S0135/CCA0542S0008/CCA0546S0235/CCA0546S0237/CCA0552S0280/CCA0566S0020/CCA0576S0057/CCA0576S0111/CCA0583S0066/CCA0597S0063/CCA0616S0046/CCA0616S0169/CCA0616S0171/CCA0632S0071/CCA0634S0047/CCA0642S0057/CCA0646S0117/CCA0694S0099/CCA0806S0139/CCA0851S0100/CCA0854S0034/CCA0898…	52
darkred	GO:0008017	microtubule binding	56/2548	167/27535	2.84e-18	1.93e-15	1.64e-15	BGI_novel_G000163/BGI_novel_G000289/BGI_novel_G000290/BGI_novel_G002521/CCA0126S0006/CCA0370S0001/CCA0522S0152/CCA0526S0327/CCA0533S0200/CCA0546S0087/CCA0552S0096/CCA0552S0144/CCA0555S0088/CCA0566S0134/CCA0601S0110/CCA0623S0127/CCA0634S0078/CCA0659S0037/CCA0698S0050/CCA0708S0044/CCA0737S0041/CCA0763S0031/CCA0774S0065/CCA0799S0056/CCA0813S0002/CCA0822S0063/CCA0831S0033/CCA0839S0041/CCA0844S0024/CC…	56
darkred	GO:0015631	tubulin binding	59/2548	183/27535	3.04e-18	1.93e-15	1.64e-15	BGI_novel_G000163/BGI_novel_G000289/BGI_novel_G000290/BGI_novel_G002521/CCA0126S0006/CCA0370S0001/CCA0522S0152/CCA0526S0327/CCA0529S0067/CCA0533S0200/CCA0546S0087/CCA0552S0096/CCA0552S0144/CCA0555S0088/CCA0566S0134/CCA0601S0110/CCA0623S0127/CCA0634S0078/CCA0659S0037/CCA0698S0050/CCA0708S0044/CCA0737S0041/CCA0763S0031/CCA0774S0065/CCA0799S0056/CCA0813S0002/CCA0822S0063/CCA0831S0033/CCA0839S0041/CC…	59
darkred	GO:0009521	photosystem	38/2548	84/27535	6.49e-18	3.08e-15	2.62e-15	BGI_novel_G000546/BGI_novel_G000786/CCA0063S0003/CCA0065S0006/CCA0383S0001/CCA0507S0127/CCA0525S0162/CCA0542S0008/CCA0546S0235/CCA0546S0237/CCA0552S0280/CCA0583S0066/CCA0616S0046/CCA0616S0169/CCA0616S0171/CCA0642S0057/CCA0646S0117/CCA0806S0139/CCA0851S0100/CCA0854S0034/CCA0898S0008/CCA0907S0053/CCA0907S0071/CCA0961S0024/CCA1005S0040/CCA1015S0047/CCA1118S0063/CCA1126S0080/CCA1199S0011/CCA1219S0071…	38
darkred	GO:0006928	movement of cell or subcellular component	43/2548	113/27535	1.17e-16	4.43e-14	3.76e-14	BGI_novel_G000163/BGI_novel_G002521/CCA0126S0006/CCA0370S0001/CCA0526S0327/CCA0533S0200/CCA0546S0087/CCA0552S0096/CCA0555S0088/CCA0566S0134/CCA0623S0127/CCA0659S0037/CCA0698S0050/CCA0708S0044/CCA0737S0041/CCA0763S0031/CCA0813S0002/CCA0822S0063/CCA0831S0033/CCA0839S0041/CCA0844S0024/CCA0884S0071/CCA0897S0138/CCA0898S0060/CCA0912S0092/CCA0984S0047/CCA1000S0016/CCA1013S0078/CCA1063S0077/CCA1068S0007…	43
darkred	GO:0005694	chromosome	67/2548	244/27535	1.85e-16	4.83e-14	4.1e-14	BGI_novel_G000959/BGI_novel_G001708/BGI_novel_G002016/CCA0090S0005/CCA0090S0007/CCA0090S0012/CCA0513S0009/CCA0513S0280/CCA0520S0135/CCA0546S0130/CCA0549S0083/CCA0573S0125/CCA0589S0169/CCA0595S0067/CCA0613S0022/CCA0627S0044/CCA0632S0013/CCA0633S0066/CCA0652S0112/CCA0679S0111/CCA0688S0094/CCA0691S0051/CCA0709S0023/CCA0736S0027/CCA0748S0091/CCA0757S0074/CCA0779S0094/CCA0799S0016/CCA0810S0112/CCA0816…	67
darkred	GO:0003777	microtubule motor activity	41/2548	105/27535	2.03e-16	4.83e-14	4.1e-14	BGI_novel_G000163/BGI_novel_G002521/CCA0126S0006/CCA0370S0001/CCA0526S0327/CCA0533S0200/CCA0546S0087/CCA0552S0096/CCA0555S0088/CCA0566S0134/CCA0623S0127/CCA0659S0037/CCA0698S0050/CCA0708S0044/CCA0737S0041/CCA0763S0031/CCA0813S0002/CCA0822S0063/CCA0831S0033/CCA0839S0041/CCA0844S0024/CCA0884S0071/CCA0897S0138/CCA0898S0060/CCA0912S0092/CCA0984S0047/CCA1000S0016/CCA1013S0078/CCA1063S0077/CCA1068S0007…	41
darkred	GO:0007018	microtubule-based movement	41/2548	105/27535	2.03e-16	4.83e-14	4.1e-14	BGI_novel_G000163/BGI_novel_G002521/CCA0126S0006/CCA0370S0001/CCA0526S0327/CCA0533S0200/CCA0546S0087/CCA0552S0096/CCA0555S0088/CCA0566S0134/CCA0623S0127/CCA0659S0037/CCA0698S0050/CCA0708S0044/CCA0737S0041/CCA0763S0031/CCA0813S0002/CCA0822S0063/CCA0831S0033/CCA0839S0041/CCA0844S0024/CCA0884S0071/CCA0897S0138/CCA0898S0060/CCA0912S0092/CCA0984S0047/CCA1000S0016/CCA1013S0078/CCA1063S0077/CCA1068S0007…	41
darkred	GO:0044427	chromosomal part	59/2548	200/27535	3.22e-16	6.79e-14	5.76e-14	BGI_novel_G000959/BGI_novel_G001708/BGI_novel_G002016/CCA0090S0005/CCA0090S0007/CCA0090S0012/CCA0513S0009/CCA0513S0280/CCA0520S0135/CCA0546S0130/CCA0573S0125/CCA0589S0169/CCA0595S0067/CCA0613S0022/CCA0627S0044/CCA0632S0013/CCA0633S0066/CCA0679S0111/CCA0688S0094/CCA0691S0051/CCA0736S0027/CCA0748S0091/CCA0757S0074/CCA0799S0016/CCA0810S0112/CCA0826S0044/CCA0857S0022/CCA0874S0020/CCA0887S0046/CCA0892…	59
darkred	GO:0044815	DNA packaging complex	36/2548	87/27535	1.56e-15	2.96e-13	2.51e-13	BGI_novel_G000959/BGI_novel_G001708/BGI_novel_G002016/CCA0090S0005/CCA0090S0007/CCA0090S0012/CCA0513S0280/CCA0589S0169/CCA0627S0044/CCA0679S0111/CCA0736S0027/CCA0826S0044/CCA0887S0046/CCA0892S0014/CCA0898S0102/CCA0975S0033/CCA0979S0001/CCA1033S0055/CCA1039S0046/CCA1063S0015/CCA1154S0008/CCA1154S0012/CCA1161S0005/CCA1179S0006/CCA1179S0009/CCA1179S0011/CCA1179S0014/CCA1244S0018/CCA1257S0018/CCA1296…	36
darkturquoise	GO:0016682	oxidoreductase activity, acting on diphenols and related substances as donors, oxygen as acceptor	28/2338	67/27535	1.93e-13	2.24e-10	2.17e-10	BGI_novel_G000362/BGI_novel_G001267/BGI_novel_G001269/BGI_novel_G001271/BGI_novel_G001273/BGI_novel_G001275/BGI_novel_G001276/BGI_novel_G002319/BGI_novel_G002901/CCA0524S0350/CCA0676S0045/CCA0680S0109/CCA0716S0074/CCA0784S0144/CCA0826S0060/CCA0829S0004/CCA0829S0006/CCA0829S0007/CCA0829S0024/CCA0905S0075/CCA0918S0046/CCA1277S0029/CCA1300S0043/CCA1300S0048/CCA1477S0007/CCA1503S0033/CCA1545S0013/CCA…	28
darkturquoise	GO:0044036	cell wall macromolecule metabolic process	32/2338	87/27535	2.63e-13	2.24e-10	2.17e-10	BGI_novel_G000873/BGI_novel_G002842/CCA0188S0004/CCA0507S0030/CCA0507S0206/CCA0513S0027/CCA0514S0090/CCA0520S0178/CCA0525S0093/CCA0552S0266/CCA0674S0084/CCA0700S0107/CCA0774S0051/CCA0779S0006/CCA0784S0028/CCA0851S0204/CCA0879S0062/CCA0879S0063/CCA0879S0065/CCA0929S0111/CCA0935S0050/CCA0986S0058/CCA1046S0003/CCA1106S0003/CCA1120S0009/CCA1280S0015/CCA1287S0046/CCA1386S0012/CCA1637S0009/CCA1637S0011…	32
darkturquoise	GO:0009698	phenylpropanoid metabolic process	30/2338	79/27535	5.48e-13	3.11e-10	3.01e-10	BGI_novel_G000362/BGI_novel_G001267/BGI_novel_G001269/BGI_novel_G001271/BGI_novel_G001273/BGI_novel_G001275/BGI_novel_G001276/BGI_novel_G002319/BGI_novel_G002901/CCA0524S0350/CCA0546S0150/CCA0589S0229/CCA0676S0045/CCA0680S0109/CCA0716S0074/CCA0784S0144/CCA0829S0004/CCA0829S0006/CCA0829S0007/CCA0829S0024/CCA0903S0007/CCA0905S0075/CCA1013S0012/CCA1027S0067/CCA1277S0029/CCA1300S0043/CCA1300S0048/CCA…	30
darkturquoise	GO:0048046	apoplast	42/2338	147/27535	1.12e-12	4.76e-10	4.61e-10	BGI_novel_G000362/BGI_novel_G001267/BGI_novel_G001269/BGI_novel_G001271/BGI_novel_G001273/BGI_novel_G001275/BGI_novel_G001276/BGI_novel_G002319/BGI_novel_G002901/CCA0188S0004/CCA0507S0030/CCA0514S0090/CCA0524S0350/CCA0552S0266/CCA0591S0138/CCA0632S0037/CCA0632S0038/CCA0674S0084/CCA0676S0045/CCA0680S0109/CCA0700S0107/CCA0716S0074/CCA0784S0144/CCA0829S0004/CCA0829S0006/CCA0829S0007/CCA0829S0024/CCA…	42
darkturquoise	GO:0009808	lignin metabolic process	27/2338	68/27535	2.26e-12	7.69e-10	7.44e-10	BGI_novel_G000362/BGI_novel_G001267/BGI_novel_G001269/BGI_novel_G001271/BGI_novel_G001273/BGI_novel_G001275/BGI_novel_G001276/BGI_novel_G002319/BGI_novel_G002901/CCA0524S0350/CCA0676S0045/CCA0680S0109/CCA0716S0074/CCA0784S0144/CCA0829S0004/CCA0829S0006/CCA0829S0007/CCA0829S0024/CCA0903S0007/CCA0905S0075/CCA1027S0067/CCA1277S0029/CCA1300S0043/CCA1300S0048/CCA1477S0007/CCA1503S0033/CCA1559S0022	27
darkturquoise	GO:0046271	phenylpropanoid catabolic process	25/2338	60/27535	4.07e-12	8.65e-10	8.38e-10	BGI_novel_G000362/BGI_novel_G001267/BGI_novel_G001269/BGI_novel_G001271/BGI_novel_G001273/BGI_novel_G001275/BGI_novel_G001276/BGI_novel_G002319/BGI_novel_G002901/CCA0524S0350/CCA0676S0045/CCA0680S0109/CCA0716S0074/CCA0784S0144/CCA0829S0004/CCA0829S0006/CCA0829S0007/CCA0829S0024/CCA0905S0075/CCA1277S0029/CCA1300S0043/CCA1300S0048/CCA1477S0007/CCA1503S0033/CCA1559S0022	25
darkturquoise	GO:0046274	lignin catabolic process	25/2338	60/27535	4.07e-12	8.65e-10	8.38e-10	BGI_novel_G000362/BGI_novel_G001267/BGI_novel_G001269/BGI_novel_G001271/BGI_novel_G001273/BGI_novel_G001275/BGI_novel_G001276/BGI_novel_G002319/BGI_novel_G002901/CCA0524S0350/CCA0676S0045/CCA0680S0109/CCA0716S0074/CCA0784S0144/CCA0829S0004/CCA0829S0006/CCA0829S0007/CCA0829S0024/CCA0905S0075/CCA1277S0029/CCA1300S0043/CCA1300S0048/CCA1477S0007/CCA1503S0033/CCA1559S0022	25
darkturquoise	GO:0052716	hydroquinone:oxygen oxidoreductase activity	25/2338	60/27535	4.07e-12	8.65e-10	8.38e-10	BGI_novel_G000362/BGI_novel_G001267/BGI_novel_G001269/BGI_novel_G001271/BGI_novel_G001273/BGI_novel_G001275/BGI_novel_G001276/BGI_novel_G002319/BGI_novel_G002901/CCA0524S0350/CCA0676S0045/CCA0680S0109/CCA0716S0074/CCA0784S0144/CCA0829S0004/CCA0829S0006/CCA0829S0007/CCA0829S0024/CCA0905S0075/CCA1277S0029/CCA1300S0043/CCA1300S0048/CCA1477S0007/CCA1503S0033/CCA1559S0022	25
darkturquoise	GO:0016679	oxidoreductase activity, acting on diphenols and related substances as donors	28/2338	79/27535	2.26e-11	4.28e-09	4.14e-09	BGI_novel_G000362/BGI_novel_G001267/BGI_novel_G001269/BGI_novel_G001271/BGI_novel_G001273/BGI_novel_G001275/BGI_novel_G001276/BGI_novel_G002319/BGI_novel_G002901/CCA0524S0350/CCA0676S0045/CCA0680S0109/CCA0716S0074/CCA0784S0144/CCA0826S0060/CCA0829S0004/CCA0829S0006/CCA0829S0007/CCA0829S0024/CCA0905S0075/CCA0918S0046/CCA1277S0029/CCA1300S0043/CCA1300S0048/CCA1477S0007/CCA1503S0033/CCA1545S0013/CCA…	28
darkturquoise	GO:0010383	cell wall polysaccharide metabolic process	24/2338	61/27535	4.7e-11	8e-09	7.75e-09	CCA0188S0004/CCA0507S0030/CCA0513S0027/CCA0514S0090/CCA0520S0178/CCA0525S0093/CCA0552S0266/CCA0674S0084/CCA0700S0107/CCA0774S0051/CCA0779S0006/CCA0784S0028/CCA0851S0204/CCA0879S0062/CCA0879S0063/CCA0879S0065/CCA0929S0111/CCA0935S0050/CCA1046S0003/CCA1106S0003/CCA1120S0009/CCA1280S0015/CCA1287S0046/CCA1641S0003	24
firebrick4	GO:0042562	hormone binding	8/1687	16/27535	1.61e-06	0.00266359	0.00266359	BGI_novel_G000684/CCA0510S0095/CCA0535S0086/CCA0597S0187/CCA0627S0018/CCA0912S0031/CCA1015S0033/CCA1257S0034	8
firebrick4	GO:0015074	DNA integration	19/1687	96/27535	4.93e-06	0.00407217	0.00407217	BGI_novel_G000104/BGI_novel_G000139/BGI_novel_G000287/BGI_novel_G000465/BGI_novel_G000468/BGI_novel_G000687/BGI_novel_G001311/BGI_novel_G001438/BGI_novel_G001635/BGI_novel_G001972/BGI_novel_G002090/BGI_novel_G002276/BGI_novel_G002488/BGI_novel_G002491/BGI_novel_G002575/BGI_novel_G002736/BGI_novel_G002759/CCA0525S0042/CCA0800S0083	19
firebrick4	GO:0038199	ethylene receptor activity	6/1687	11/27535	1.85e-05	0.00612305	0.00612305	BGI_novel_G000684/CCA0510S0095/CCA0597S0187/CCA0627S0018/CCA0912S0031/CCA1257S0034	6
firebrick4	GO:0051740	ethylene binding	6/1687	11/27535	1.85e-05	0.00612305	0.00612305	BGI_novel_G000684/CCA0510S0095/CCA0597S0187/CCA0627S0018/CCA0912S0031/CCA1257S0034	6
firebrick4	GO:0072328	alkene binding	6/1687	11/27535	1.85e-05	0.00612305	0.00612305	BGI_novel_G000684/CCA0510S0095/CCA0597S0187/CCA0627S0018/CCA0912S0031/CCA1257S0034	6
firebrick4	GO:0003955	NAD(P)H dehydrogenase (quinone) activity	5/1687	10/27535	0.00016673	0.0459062	0.0459062	BGI_novel_G001508/BGI_novel_G001509/CCA0211S0001/CCA0582S0099/CCA1251S0046	5
