# Supplementary material for: Global Transcriptome Analysis Revealed the Molecular Regulation Mechanism of Pigment and Reactive Oxygen Species Metabolism During the Stigma Development of Carya cathayensis
Source: Front Plant Sci. 2022 May 9;13:881394. doi: 10.3389/fpls.2022.881394 (PMC9125253; doi:10.3389/fpls.2022.881394)
Supplement: Supplementary file 11 [file Table_10.XLSX]

## Sheet: Sheet1
Supplementary Table 10 Numbers of pigments, ROS and transcription factors in four key modles
Name	module Colors	family	symbol	Degree	Max Log	MIn Log
CCA1503S0015	darkred	chlorophyll	HEME2	439	-0.157063	-1.2444
CCA1377S0020	darkred	chlorophyll	CAO(CHL)	408	-0.23508	-2.33894
CCA1498S0035	darkturquoise	chlorophyll	CRN1	369	0.548211	0.329872
CCA0616S0014	darkturquoise	chlorophyll	PAO/ACD1	345	2.18877	0.371947
CCA0694S0099	darkred	chlorophyll	CRD1(ACSF)	343	-0.46425	-0.535989
CCA0676S0015	darkred	chlorophyll	HEME2	333	-0.186073	-1.73692
CCA0632S0071	darkred	chlorophyll	CHLD	325	-0.494761	-0.823278
CCA0587S0082	darkturquoise	chlorophyll	CHLG	319	1.54793	-0.679781
CCA0737S0024	darkred	chlorophyll	HEMC	316	-0.35064	-0.792597
CCA0700S0013	darkred	chlorophyll	CHLG	315	0.121538	-0.679285
CCA0782S0001	darkturquoise	chlorophyll	NYE1	312	2.87888	-0.528557
CCA0708S0071	darkred	chlorophyll	HEMA1	301	-0.194758	-0.77314
CCA0576S0111	darkred	chlorophyll	PORA	299	-0.0192665	-0.844708
CCA0566S0020	darkred	chlorophyll	CHLI1	296	-0.315704	-1.04841
CCA0576S0246	darkred	chlorophyll	HEME1	292	-0.039863	-0.593662
CCA0862S0116	darkred	chlorophyll	CHLH	285	-0.15018	-2.31348
CCA0953S0097	darkred	chlorophyll	HEMA1	283	-0.13983	-0.914721
CCA0803S0014	darkturquoise	chlorophyll	CAO(CHL)	274	0.577092	-0.839857
CCA0975S0060	darkred	chlorophyll	DVR	269	-0.0230276	-1.49199
CCA0539S0135	darkred	chlorophyll	CHLI1	265	0.15986	-1.14109
CCA0774S0017	firebrick4	chlorophyll	FCC/ACD2	229	0.521858	-1.11033
CCA0500S0074	firebrick4	chlorophyll	CLH2	186	3.54539	-0.581546
CCA0789S0082	brown2	chlorophyll	CLH2	62	0.735851	-1.08647
CCA0887S0096	darkred	carotenoids	PSY	401	0.033109	-1.15032
CCA0831S0026	darkred	carotenoids	PDS3	367	-0.330779	-0.527515
CCA0259S0002	darkturquoise	carotenoids	DXR	335	0.0965271	-1.03687
CCA0789S0066	darkred	carotenoids	LUT5	334	-0.151188	-0.514402
CCA1769S0023	darkred	carotenoids	DXS1	327	-0.192279	-1.14672
CCA0539S0265	darkturquoise	carotenoids	GGPS11	315	3.49459	-1.49031
CCA1229S0002	darkred	carotenoids	PSY	309	-0.207398	-0.95004
CCA1188S0007	darkturquoise	carotenoids	LCYB	306	0.602417	-1.50759
CCA0514S0096	darkred	carotenoids	DcCCS	285	0.497674	-0.786117
CCA0879S0081	firebrick4	carotenoids	DXS1	270	2.48609	-0.69889
CCA1052S0044	darkred	carotenoids	DcCCS	249	0.360657	-1.31567
CCA0664S0001	firebrick4	carotenoids	DXS1	248	2.69518	-1.0374
CCA0975S0037	firebrick4	carotenoids	DXS1	242	0.444756	-1.41613
CCA0595S0039	firebrick4	carotenoids	IPI	227	0.916747	-0.210599
CCA0989S0028	firebrick4	carotenoids	HDS	219	0.905952	-0.679599
CCA0774S0022	darkred	ABA_related / carotenoids	ABA1/LOS6 / ZEP	192	0.463386	-1.11373
CCA1016S0002	brown2	ABA_related / carotenoids	NCED3	79	1.59111	-0.868902
CCA0899S0019	brown2	ABA_related / carotenoids	NCED3	70	2.57708	-3.4073
CCA0597S0058	brown2	ABA_related / carotenoids	NCED3	56	3.93783	-1.97903
CCA0006S0007	darkred	anthocyanin	FLS1	431	-0.0381316	-4.40951
CCA0881S0026	darkred	anthocyanin	4CL8	430	-0.32689	-2.05294
CCA0743S0031	darkturquoise	anthocyanin	F3'H(TT7)	417	0.682095	0.185298
CCA0507S0050	darkturquoise	anthocyanin	F3'H(TT7)	411	0.654082	0.214762
CCA1606S0005	darkred	anthocyanin	TT12	409	-0.0523931	-0.915461
CCA0559S0149	darkred	anthocyanin	ANS(LDOX/TT18)	395	0.670683	0.017871
CCA0887S0030	darkred	TF / anthocyanin	MYB113 / PAP2(MYB90)	395	-0.373475	-2.28517
CCA0505S0060	darkturquoise	anthocyanin	F3'H(TT7)	378	1.5561	0.828706
CCA0977S0012	darkturquoise	anthocyanin	F3'H(TT7)	374	3.84751	1.62537
CCA1707S0001	darkturquoise	anthocyanin	F3'5'H	369	3.46181	-0.307383
CCA0522S0106	darkturquoise	anthocyanin	F3'H(TT7)	367	2.65458	0.575071
CCA1285S0013	darkturquoise	anthocyanin	4CL8	364	0.586204	0.323788
CCA0566S0184	darkturquoise	anthocyanin	TT12	362	1.72361	-0.000321699
CCA1519S0029	darkturquoise	anthocyanin	F3'5'H	362	1.55124	0.323823
CCA0828S0048	darkturquoise	anthocyanin	F3'H(TT7)	357	1.68755	0.515479
CCA0634S0117	darkturquoise	anthocyanin	F3'H(TT7)	356	1.17863	0.162729
CCA1526S0019	darkturquoise	anthocyanin	4CL2	353	1.79126	-0.775559
CCA0591S0114	darkturquoise	anthocyanin	UGT73B2	351	2.05005	-0.435682
CCA0500S0229	darkred	anthocyanin	AHA10	350	-0.600952	-1.21443
CCA0733S0116	darkturquoise	anthocyanin	F3'H(TT7)	350	2.19911	0.526578
CCA0678S0013	darkturquoise	anthocyanin	MRP3	348	1.84641	-0.417524
CCA0616S0021	darkturquoise	anthocyanin	F3'5'H	347	2.11276	0.393312
CCA0533S0151	darkturquoise	anthocyanin	F3'H(TT7)	346	2.08633	0.372557
CCA0587S0097	darkred	anthocyanin	ANS(LDOX/TT18)	346	3.01698	0.383778
CCA0559S0118	darkred	anthocyanin	UGT88A1	345	-0.437738	-0.562075
CCA1707S0011	darkturquoise	anthocyanin	F3'H(TT7)	344	1.64781	-0.0649128
CCA0851S0056	darkturquoise	anthocyanin	AHA10	343	2.92127	-0.00291482
CCA0691S0117	darkturquoise	anthocyanin	C4H	342	2.79705	0.654558
CCA0884S0114	darkturquoise	anthocyanin	UGT88A1	342	4.45581	-2.39948
CCA0533S0254	darkturquoise	anthocyanin	F3'H(TT7)	340	3.87998	0.994183
CCA1277S0035	darkturquoise	anthocyanin	AHA10	340	1.20097	-0.544506
CCA0886S0003	darkturquoise	anthocyanin	MRP3	338	3.13632	-0.222381
CCA0546S0150	darkturquoise	anthocyanin	PAL1	337	1.67258	-0.469412
CCA1805S0002	darkturquoise	anthocyanin	UGT71C4	336	3.89703	0.482354
CCA0929S0057	darkturquoise	anthocyanin	UGT73B2	335	2.11366	-0.432017
CCA0986S0081	darkturquoise	anthocyanin	F3'H(TT7)	333	1.4852	-0.178017
CCA0552S0027	darkturquoise	anthocyanin	F3'H(TT7)	332	4.01062	0.397731
CCA0991S0050	darkturquoise	anthocyanin	F3'H(TT7)	332	4.46375	-0.674081
CCA1540S0009	darkturquoise	anthocyanin	TT12	332	2.76852	-0.83675
CCA0721S0015	darkturquoise	IAA_related / anthocyanin	CYP83B1/SUR2 / F3'H(TT7)	329	2.56015	-0.00722452
CCA0526S0158	darkturquoise	anthocyanin	DFR(TT3)	328	3.38416	-0.78456
CCA0607S0027	darkturquoise	anthocyanin	FLS1	326	7.30976	-0.501955
CCA1132S0023	darkturquoise	IAA_related / anthocyanin	CYP83B1/SUR2 / F3'H(TT7)	326	5.82452	-0.102771
CCA0470S0001	darkturquoise	anthocyanin	F3'H(TT7)	325	6.99231	-0.254681
CCA0529S0059	darkturquoise	IAA_related / anthocyanin	CYP83B1/SUR2 / F3'H(TT7)	325	7.03913	-0.2099
CCA1027S0067	darkturquoise	anthocyanin	F3'H(TT7)	325	6.25327	-0.149453
CCA0552S0054	darkturquoise	anthocyanin	F3'H(TT7)	324	3.27879	-1.11957
CCA0810S0026	darkred	anthocyanin	F3'H(TT7)	324	-0.805298	-1.5838
CCA1410S0015	darkturquoise	anthocyanin	TT12	324	3.21209	-0.456783
CCA0806S0019	darkred	anthocyanin	F3'5'H	322	-0.104698	-0.771017
CCA1250S0092	darkturquoise	anthocyanin	CHS(TT4)	322	4.03757	-2.86903
CCA0582S0097	darkred	anthocyanin	UGT71C3	321	-0.538311	-0.909366
CCA1094S0100	darkturquoise	anthocyanin	MRP1	321	2.4828	-0.152825
CCA0522S0210	darkturquoise	anthocyanin	DFR(TT3)	320	4.01425	-0.47613
CCA0662S0078	darkturquoise	anthocyanin	ANS(LDOX/TT18)	320	3.10733	-0.320405
CCA0674S0022	darkturquoise	anthocyanin	AHA10	320	4.52045	-1.54774
CCA1560S0007	darkturquoise	anthocyanin	F3'H(TT7)	320	1.25282	-0.338493
CCA0705S0007	darkred	anthocyanin	TT12	319	-0.0396826	-1.10725
CCA0724S0020	darkred	TF / anthocyanin	GL3,MYC6.2	319	-0.279929	-0.726387
CCA0589S0052	darkturquoise	anthocyanin	DFR(TT3)	318	3.04208	-0.193141
CCA0813S0024	darkred	anthocyanin	TT12	318	-0.52806	-0.834263
CCA0524S0150	darkturquoise	anthocyanin	C4H	317	2.22454	-0.114715
CCA0633S0027	darkturquoise	anthocyanin	AHA10	316	1.41862	-0.562267
CCA1151S0045	darkred	CK_related / anthocyanin	UGT73C2	314	-0.4276	-1.2566
CCA0705S0011	darkred	anthocyanin	TT12	313	-0.235642	-0.733542
CCA0879S0073	darkred	anthocyanin	UGT78D2	311	-0.558078	-1.52687
CCA0552S0055	darkred	anthocyanin	F3'5'H	310	-0.315849	-1.03998
CCA0662S0022	darkturquoise	anthocyanin	4CL2	310	2.54001	-0.698759
CCA0869S0052	darkred	anthocyanin	UGT73B4	310	-0.0825652	-2.03988
CCA0834S0045	darkturquoise	anthocyanin	MRP2	309	2.05853	-0.551483
CCA1013S0012	darkturquoise	anthocyanin	PAL1	309	1.93465	-0.718899
CCA0589S0229	darkturquoise	anthocyanin	PAL2	307	1.61615	-0.666628
CCA1528S0031	darkred	anthocyanin	TT12	306	0.28654	-0.720352
CCA1113S0014	darkturquoise	anthocyanin	4CL3	304	1.65603	-0.951989
CCA0957S0009	darkred	anthocyanin	F3'H(TT7)	303	-0.234494	-1.76018
CCA1310S0016	darkred	anthocyanin	TT12	303	-0.875934	-1.8297
CCA0718S0065	darkturquoise	anthocyanin	UGT78D2	301	0.848834	-3.0117
CCA0552S0057	darkred	anthocyanin	F3'H(TT7)	300	-0.0638836	-0.588167
CCA0705S0015	darkred	anthocyanin	TT12	300	0.548771	-0.962721
CCA0709S0057	darkred	anthocyanin	F3'H(TT7)	296	0.426821	-1.83679
CCA0991S0014	firebrick4	anthocyanin	UGT88A1	294	2.35353	-1.5243
CCA0662S0036	darkred	IAA_related / anthocyanin	CYP79B2 / F3'H(TT7)	289	2.27418	-0.339273
CCA0659S0255	darkred	anthocyanin	F3'H(TT7)	288	0.379377	-1.37928
CCA0526S0313	darkred	TF / anthocyanin	MYB111,PFG3	283	0.0927609	-1.80754
CCA1707S0014	darkturquoise	anthocyanin	F3'H(TT7)	274	0.503862	0.166579
CCA0552S0063	darkred	anthocyanin	F3'H(TT7)	273	0.632996	-1.84254
CCA0708S0027	darkred	anthocyanin	4CL8	273	0.655214	0.120985
CCA0552S0064	darkred	anthocyanin	F3'H(TT7)	265	0.228042	-0.863649
CCA0765S0035	firebrick4	anthocyanin	4CL8	258	1.84274	-0.721386
CCA0555S0245	darkred	anthocyanin	F3'H(TT7)	252	0.293764	-1.38413
CCA0851S0183	darkred	anthocyanin	C4H	252	0.417183	-0.827192
CCA0754S0164	darkred	anthocyanin	AHA10	250	0.485816	-0.579438
CCA0957S0012	darkred	anthocyanin	F3'H(TT7)	247	1.20099	-1.82509
CCA1509S0003	darkred	anthocyanin	F3'H(TT7)	245	1.08384	-1.34719
CCA1731S0010	firebrick4	anthocyanin	MRP1	242	1.09548	-0.385969
CCA0754S0165	darkred	anthocyanin	AHA10	241	0.537194	-0.58568
CCA0958S0005	darkred	anthocyanin	UF3GT	240	1.2989	-0.0558359
CCA0691S0036	darkred	TF / anthocyanin	MYB12,PFG1	236	0.449757	-1.13782
CCA0991S0015	firebrick4	anthocyanin	UGT88A1	235	2.68706	-2.49064
CCA0559S0106	firebrick4	anthocyanin	MRP3	232	0.611412	-0.53005
CCA0047S0001	firebrick4	anthocyanin	F3'H(TT7)	231	2.47733	-1.01711
CCA0616S0065	firebrick4	CK_related / anthocyanin	UGT73B4	229	1.03628	-3.29517
CCA0533S0086	firebrick4	anthocyanin	F3'H(TT7)	226	1.99124	-3.72445
CCA0670S0123	firebrick4	anthocyanin	UGT73B4	225	0.913631	-2.17444
CCA0848S0029	firebrick4	anthocyanin	MRP3	223	1.37641	-1.34749
CCA0918S0126	firebrick4	TF / anthocyanin	MYB13	222	1.34765	-1.83681
CCA0958S0006	firebrick4	anthocyanin	UGT79B6	222	0.772808	-1.48401
CCA0559S0120	firebrick4	anthocyanin	UGT88A1	221	1.12807	-1.1038
CCA0542S0025	firebrick4	anthocyanin	ANS(LDOX/TT18)	217	2.47901	-2.0959
CCA0678S0204	darkred	anthocyanin	MRP3	217	0.425843	-1.1466
CCA1055S0071	firebrick4	anthocyanin	MRP2	217	0.595605	-1.43597
CCA1068S0012	darkred	anthocyanin	UF3GT	217	0.148103	-1.16412
CCA0958S0007	firebrick4	anthocyanin	UF3GT	215	1.11259	-0.901766
CCA0500S0295	firebrick4	anthocyanin	F3'H(TT7)	210	1.6523	-2.3373
CCA0662S0076	firebrick4	anthocyanin	ANS(LDOX/TT18)	206	0.468332	-1.15589
CCA0857S0026	firebrick4	anthocyanin	TT12	205	0.956482	-0.127301
CCA1095S0094	firebrick4	anthocyanin	4CL8	199	2.10982	-0.467767
CCA1326S0044	firebrick4	anthocyanin	UGT73B2	198	3.37924	-4.43837
CCA0810S0020	firebrick4	anthocyanin	F3'H(TT7)	191	1.67073	-1.34538
CCA0924S0001	firebrick4	ROS_related / anthocyanin	GSTF11 / TT19	190	1.43385	-8.79496
CCA0500S0121	firebrick4	anthocyanin	UGT73B5	189	1.77119	-2.84581
CCA0810S0022	darkred	anthocyanin	F3'H(TT7)	188	0.625673	-1.04157
CCA0559S0163	firebrick4	anthocyanin	F3'H(TT7)	187	1.0098	-0.48477
CCA0591S0121	firebrick4	anthocyanin	UGT73B4	169	2.127	-1.39566
CCA0887S0029	firebrick4	TF / anthocyanin	MYB113 / PAP2(MYB90)	169	1.19778	-3.64477
CCA1441S0004	firebrick4	anthocyanin	TT12	169	1.6918	-3.44034
CCA0642S0112	firebrick4	anthocyanin	DFR(TT3)	162	1.19453	-1.50559
CCA1197S0007	firebrick4	anthocyanin	UGT88A1	157	2.47385	-1.50774
CCA0754S0107	brown2	anthocyanin	F3'H(TT7)	141	1.03667	-1.7892
CCA1326S0048	firebrick4	CK_related / anthocyanin	UGT73C2	123	1.98581	-2.60494
CCA1094S0120	brown2	anthocyanin	AHA10	104	1.36438	-0.91883
CCA0662S0037	firebrick4	IAA_related / anthocyanin	CYP79B2 / F3'H(TT7)	83	2.73316	-1.50942
CCA0957S0013	darkturquoise	anthocyanin	F3'H(TT7)	78	2.16779	-1.69173
CCA0646S0175	brown2	anthocyanin	MRP3	74	1.36101	-1.216
CCA0633S0009	firebrick4	TF / anthocyanin	MYB111,PFG3	72	1.58238	-1.16228
CCA0589S0109	brown2	anthocyanin	F3'5'H	71	1.84054	-1.01702
CCA1591S0017	brown2	anthocyanin	PAL2	68	2.75141	-2.31631
CCA1223S0020	brown2	anthocyanin	TT12	66	3.71908	-4.43676
CCA0884S0119	brown2	anthocyanin	UGT88A1	64	2.1259	-3.19759
CCA1591S0016	brown2	anthocyanin	PAL2	59	3.05031	-4.05672
CCA0782S0027	brown2	anthocyanin	TT12	51	4.00304	-2.28437
CCA0507S0010	darkred	TF	HB-7,HDG5	447	-0.253272	-1.04516
CCA0986S0043	darkred	TF		442	-0.251937	-2.31888
CCA0582S0108	darkred	TF		439	-0.089279	-1.26646
CCA1647S0014	darkred	TF	RVE1	438	-0.316496	-1.03033
CCA0678S0099	darkturquoise	TF	NAC017	436	0.644917	-0.0744861
CCA1505S0010	darkred	TF	ZML1,GATA24	432	-0.208822	-0.830254
CCA0524S0143	darkturquoise	TF	CRF4	426	1.34677	0.290371
CCA0859S0060	darkturquoise	TF		424	0.721669	0.0338006
CCA0905S0121	darkturquoise	TF	TCX2	421	-0.00496343	-1.22543
CCA1126S0079	darkturquoise	TF	NAP	419	1.90446	0.123719
CCA0539S0064	darkturquoise	TF	WRKY65	416	1.83653	-0.468002
CCA0573S0068	darkturquoise	TF	WRKY75	412	2.54653	-0.197755
CCA1251S0043	darkturquoise	TF	HAM4,SCL15	411	0.780003	0.103193
CCA0844S0051	darkturquoise	TF	HSFA5	407	0.527745	0.0702428
CCA0513S0137	darkred	TF	AP1/CAL	406	0.032387	-1.02277
CCA0897S0121	darkred	TF	ABS2,NGAL1	405	0.821808	0.391843
CCA0989S0048	darkturquoise	TF	ARF10	405	0.839154	0.0834985
CCA1046S0016	darkred	TF	HB-7,HDG5	405	-0.268278	-0.751261
CCA0628S0043	darkturquoise	TF	WRKY22	403	1.33462	-0.502713
CCA0716S0064	darkred	TF	TRFL2	397	-0.0493443	-0.751706
CCA1147S0013	darkred	TF	NFXL1	396	0.979454	-0.426258
CCA0587S0093	darkred	TF		395	1.64783	-0.0875556
CCA1223S0026	darkred	TF		393	-0.49602	-1.81695
CCA1309S0003	darkred	TF	MYB16,MIXTA	390	-0.0855565	-1.4632
CCA1126S0027	darkturquoise	TF		388	-0.0582159	-0.863695
CCA1002S0065	darkturquoise	TF	SCL14,GRAS2	386	1.65471	-0.435148
CCA0897S0074	darkturquoise	TF	BLH1	385	1.11693	0.13501
CCA0524S0174	darkred	TF	bZIP18	382	-0.331251	-0.736101
CCA0779S0066	darkturquoise	TF	MIF2	381	1.33657	-0.00400594
CCA1287S0003	darkturquoise	TF	NAC083,VNI2	380	1.62683	0.0327376
CCA1079S0032	darkred	TF	PC-MYB1,MYB3R-1	379	-0.222698	-0.591907
CCA0520S0213	darkred	TF	ATPHAN,AS1,MYB91	377	-0.0500123	-0.721144
CCA0526S0256	darkturquoise	TF	MYB2	377	2.85612	-0.189434
CCA0597S0104	darkturquoise	TF	KUA1,MYBH	377	0.851929	-0.173552
CCA0587S0007	darkturquoise	TF		376	0.596388	0.230483
CCA0549S0052	darkturquoise	TF	WLIM1	373	1.33358	0.259492
CCA0082S0007	darkturquoise	TF	MYB65	372	1.52564	-0.281496
CCA1575S0021	darkturquoise	TF	ULT1	372	1.17684	-0.385212
CCA0649S0109	darkturquoise	TF	BLH1	371	1.3945	0.293316
CCA1022S0024	darkturquoise	TF	NAC028	371	1.09577	0.13795
CCA1016S0014	darkred	TF	TCP2	370	-0.140504	-0.611691
CCA0922S0013	darkturquoise	TF	MYB62,BW62B	369	1.09549	0.399318
CCA0526S0111	darkturquoise	TF	Rap2.6L	368	2.98642	0.341753
CCA0676S0020	darkturquoise	TF	LBD15,ASL11	368	1.60891	0.612685
CCA0549S0084	darkred	TF		367	0.853314	-0.151305
CCA0573S0207	darkturquoise	TF	NAC087	367	1.16414	-0.485388
CCA0505S0325	darkturquoise	TF	ASR3	366	1.12626	0.0837975
CCA1748S0002	darkturquoise	TF	HSF4,HSFB1	366	1.7456	0.426267
CCA0941S0015	darkturquoise	TF	CIB3	363	1.642	-0.268812
CCA1126S0039	darkturquoise	TF	TCP20,PCF1	363	0.740636	0.0462298
CCA0754S0171	darkturquoise	TF	GAMMAMYB2	362	-0.00941988	-0.689001
CCA0546S0126	darkturquoise	TF	NAC050	359	0.707318	0.19112
CCA0688S0024	darkturquoise	TF	WRKY6	359	3.01639	-1.27977
CCA0737S0105	darkturquoise	TF	TLP10	359	1.10586	-0.00990688
CCA0757S0038	darkturquoise	TF	CPUORF7	359	1.16199	-0.442001
CCA0862S0050	darkred	TF		359	0.0359985	-1.01542
CCA1097S0084	darkturquoise	TF	LBD37,ASL39	359	2.11759	0.248964
CCA0680S0023	darkturquoise	TF	RAX3,MYB84	356	2.03657	0.857606
CCA0502S0111	darkturquoise	TF	SMB	354	1.93551	-0.592847
CCA0502S0008	darkturquoise	TF	FRF2	353	1.27345	-0.171935
CCA1301S0020	darkturquoise	TF	ZAT11	353	3.95085	-1.76057
CCA0525S0155	darkred	TF	VRN1	352	-0.458628	-2.0665
CCA0861S0017	darkturquoise	TF	LBD1	352	2.85053	-0.799699
CCA1002S0094	darkturquoise	TF	PCL1	352	1.38652	-0.0537513
CCA0836S0110	darkturquoise	TF	NAC010,SND3	351	0.824963	0.0722236
CCA1054S0058	darkturquoise	TF	BLH8,PNF	350	1.26904	-0.287463
CCA1498S0033	darkturquoise	TF	bZIP23	350	3.45684	-1.47073
CCA0566S0044	darkturquoise	TF	COG1	349	1.41956	0.124379
CCA1197S0026	darkturquoise	TF	ARF16	349	2.29718	-0.194001
CCA1705S0028	darkturquoise	TF	C3H14	349	1.93757	0.203446
CCA0525S0112	darkturquoise	TF	HSF4,HSFB1	348	1.66155	0.196459
CCA1644S0016	darkred	TF	ERF2	348	1.33253	0.593734
CCA0605S0068	darkturquoise	TF	KAN1	347	1.32668	0.156029
CCA0623S0002	darkturquoise	TF		347	0.164334	-2.38128
CCA0659S0198	darkturquoise	TF	GATA5	347	2.16436	-0.39416
CCA0525S0136	darkturquoise	TF	ASL1,LBD36	346	3.14741	0.150912
CCA1229S0011	darkturquoise	TF	WRKY28	345	2.97057	0.0449264
CCA0526S0079	darkturquoise	TF	NAC083,VNI2	344	1.4143	0.0507942
CCA0659S0183	darkturquoise	TF	STH2	344	3.55378	0.275064
CCA1217S0015	darkred	TF	HDG2	344	-0.276142	-0.629195
CCA0500S0309	darkturquoise	TF	MYB36	343	2.74036	-0.0295167
CCA0514S0238	darkturquoise	TF	MYB93	343	3.51801	0.688411
CCA0539S0151	darkturquoise	TF	ERF-1	343	3.10429	0.308573
CCA0583S0104	darkturquoise	TF	NAC080	343	1.38771	0.035418
CCA0634S0054	darkturquoise	TF	MIF3	343	1.3062	-0.100605
CCA0686S0007	darkturquoise	TF		343	1.16798	-0.337223
CCA0982S0010	darkturquoise	TF	ZAT11	343	3.04495	-0.858007
CCA0576S0060	darkturquoise	TF	MYB102,ATM4	342	2.94409	0.795142
CCA0884S0094	darkred	TF	GATA2	341	-0.317695	-1.51018
CCA1263S0010	darkturquoise	TF	IDD4	341	1.00938	-0.0352692
CCA1655S0011	darkred	TF	NF-YB11	340	-0.206368	-1.19126
CCA0782S0035	darkred	TF		339	-0.5305	-1.41596
CCA1154S0001	darkturquoise	TF	ZAT11	339	5.39426	-2.05179
CCA1593S0044	darkturquoise	TF	TINY2	339	4.00438	0.518129
CCA0513S0008	darkturquoise	TF	WRKY75	338	2.43792	-0.11227
CCA0754S0055	darkturquoise	TF	MYB26	338	4.27603	0.177103
CCA0848S0025	darkturquoise	TF	DOF1	338	0.342432	-1.99794
CCA1015S0072	darkturquoise	TF	LBD1	338	4.46067	0.128173
CCA0514S0062	darkred	TF	BBX10,COL12	337	-0.472009	-0.999684
CCA0546S0249	darkturquoise	TF		337	3.01187	1.06877
CCA0724S0076	darkturquoise	TF		337	3.78107	-1.35592
CCA0542S0186	darkturquoise	TF	APL,WDY	335	2.23491	-0.499712
CCA0904S0167	darkred	TF	DBP1	335	-0.0250164	-0.605913
CCA1498S0018	darkturquoise	TF	SCL3	335	1.21327	-0.419984
CCA0278S0002	darkturquoise	TF	NAC087	334	2.05966	-0.218002
CCA0524S0334	darkturquoise	TF	TAC1	334	4.40336	0.214133
CCA1223S0018	darkturquoise	TF		334	3.72108	-2.44116
CCA1813S0007	darkturquoise	TF	LBD1	334	4.62521	-0.256772
CCA0784S0111	darkturquoise	TF	SCL14,GRAS2	333	1.63877	-0.931566
CCA0824S0054	darkturquoise	TF	OFP2	333	1.61569	-0.500254
CCA0849S0074	darkturquoise	TF	NLP8	333	0.730988	0.0195046
CCA1179S0028	darkred	TF	STM,BUM1,SHL,WAM1	333	-0.253149	-1.02152
CCA0662S0100	darkturquoise	TF	WRKY28	332	5.02662	0.0216619
CCA0665S0079	darkturquoise	TF	LBD11	332	4.41672	0.0370746
CCA0716S0065	darkturquoise	TF		332	2.87793	-1.65405
CCA0831S0032	darkturquoise	TF	CIB3	332	1.21224	-0.0553257
CCA0852S0031	darkred	TF	CRC	332	-0.588705	-1.5442
CCA1371S0024	darkturquoise	TF	TINY2	332	1.40613	-0.750476
CCA1505S0009	darkred	TF	ZML1,GATA24	332	-0.154414	-0.792149
CCA0010S0002	darkturquoise	TF	ERF5	331	4.41729	-2.59689
CCA0546S0016	darkturquoise	TF	ERF5	331	5.28923	-3.08321
CCA0546S0242	darkturquoise	TF	ZAT11	331	4.51832	0.0576105
CCA0757S0066	darkturquoise	TF	MYB15,ATY19	331	5.85169	0.00321272
CCA1524S0029	darkturquoise	TF	ERF043	331	5.46736	-2.01374
CCA0514S0136	darkred	TF	AIL5,CHO1,EMK	330	-0.267909	-1.03043
CCA0779S0080	darkred	TF	HB-3,HAT7	330	-0.500939	-0.621914
CCA0786S0042	darkred	TF	PHL1	330	0.589656	0.320795
CCA1537S0012	darkturquoise	TF	IDD4	329	1.04667	0.0301194
CCA0507S0245	darkturquoise	TF	EFM,HHO4	328	1.58552	-0.635621
CCA0555S0109	darkturquoise	TF	DPA4,NGAL3	328	2.1596	0.00303139
CCA0918S0091	darkturquoise	TF	NAC012,SND1,NST3	328	3.29701	-0.570624
CCA1594S0014	darkturquoise	TF	WRKY70	327	4.24975	-2.26505
CCA1775S0011	darkred	TF	PHB	327	-0.363389	-0.523794
CCA0568S0059	darkturquoise	TF	MYB102,ATM4	326	6.12298	0.0528688
CCA0598S0076	darkturquoise	TF	NST1,EMB2301	326	3.87811	-0.364044
CCA0659S0021	darkturquoise	TF	HHO5,UIF1	326	2.27502	-0.6424
CCA0709S0033	darkred	TF	STC8,bHLH106	326	-0.413636	-0.80198
CCA0800S0035	darkturquoise	TF	HB-1,HD-ZIP-1,HAT5	326	4.80873	-0.226753
CCA0816S0042	darkturquoise	TF	NAC100	326	3.00649	-0.016988
CCA0925S0072	darkred	TF	AFO,FIL,YAB1	326	-0.283244	-1.28288
CCA0628S0078	darkturquoise	TF	MYB102,ATM4	325	5.48181	-3.62538
CCA0680S0112	darkturquoise	TF	WLIM2b	325	0.270166	-1.83485
CCA0757S0084	darkturquoise	TF	NAC074	325	2.5071	-0.00374513
CCA0961S0018	darkturquoise	TF	MYB102,ATM4	325	6.433	0.00641081
CCA1430S0009	darkturquoise	TF	RAX3,MYB84	325	4.1899	-1.10209
CCA1505S0005	darkturquoise	TF	DREB2C,ERF48	325	1.11846	-0.0143656
CCA1634S0009	darkturquoise	TF	ZFN1	325	0.567646	0.293058
CCA0513S0200	darkred	TF	WRKY3	324	1.43501	0.31514
CCA0681S0098	darkred	TF	WHY1,PTAC1	324	-0.235009	-0.577157
CCA0848S0114	darkred	TF	GRF5	324	-0.869303	-1.20095
CCA0522S0233	darkred	TF	PC-MYB1,MYB3R-1	323	0.155306	-2.03586
CCA0533S0209	darkred	TF	ANT,DRG,CKC1	323	-0.331657	-1.08411
CCA0646S0092	darkred	TF	NF-YB3	323	-0.221592	-0.485098
CCA0800S0068	darkred	TF	AGL42	323	-0.268313	-0.537005
CCA0954S0020	darkturquoise	TF	MYB9	323	5.25778	-0.820118
CCA0524S0065	darkturquoise	TF	DREB26	322	5.17033	-1.2151
CCA0822S0065	darkturquoise	TF	ILR3,bHLH105	322	1.24558	-0.520182
CCA1097S0051	darkturquoise	TF	CIB4	322	2.49527	-0.954766
CCA1363S0036	darkturquoise	TF	GATA5	322	3.65402	-1.8546
CCA1669S0001	darkturquoise	TF	SGR5,IDD15	322	1.232	-0.277419
CCA0546S0188	darkturquoise	TF	LBD1	321	3.98359	-0.422797
CCA0676S0097	darkred	TF	WRKY48	320	0.00970252	-0.653256
CCA1351S0001	darkred	TF	DTF1,SHH1	320	-0.328319	-0.639275
CCA0546S0059	darkred	TF	TLP8	319	-0.237499	-1.39224
CCA0824S0041	darkturquoise	TF	WRKY70	319	2.89698	-1.35294
CCA0834S0049	darkturquoise	TF	MYB36	319	2.74691	-0.328646
CCA0909S0064	darkred	TF		319	0.885008	0.108413
CCA0816S0113	darkturquoise	TF	MYB121	318	4.678	-0.610369
CCA0846S0036	darkturquoise	TF	MYC4	318	0.32025	-1.66619
CCA0859S0035	darkturquoise	TF	WLIM1	318	1.65975	-0.364738
CCA0877S0023	darkturquoise	TF	WRKY42	318	4.36564	-0.813844
CCA0904S0030	darkturquoise	TF	FBH1,CFLAP2	318	2.20627	-0.379857
CCA1279S0046	darkturquoise	TF	RL1,RSM2	317	4.70382	-1.38801
CCA0605S0039	darkturquoise	TF	HDG11,EDT1	316	1.57163	-0.704072
CCA0607S0039	darkred	TF	MYC70	316	-0.532839	-1.41871
CCA0638S0102	darkturquoise	TF	YAB5	316	0.548578	-2.89484
CCA0513S0265	darkturquoise	TF	HOS10,MYB8	315	2.67052	-1.14326
CCA0633S0107	darkturquoise	TF	WRKY42	315	2.33111	-0.264169
CCA0873S0001	darkturquoise	TF	HEC1	315	0.648165	-8.64178
CCA0737S0010	darkturquoise	TF	LBD38	314	2.51556	-1.19869
CCA0838S0070	darkturquoise	TF	KNAT2,ATK1	314	2.20614	-0.760424
CCA0861S0025	darkred	TF	DOF2.1	314	0.0367167	-1.2734
CCA1079S0054	darkred	TF	TINY2	314	-0.306661	-1.40752
CCA0824S0106	darkturquoise	TF	VIP1,SUE3	312	1.1625	-0.043832
CCA0918S0016	darkred	TF	BPC7,BBR	312	-0.0557657	-1.24439
CCA0525S0018	darkred	TF	GRF1	311	0.243866	-1.44028
CCA0549S0010	darkred	TF	ARF9	311	-0.00854191	-0.931341
CCA0549S0072	darkred	TF	DEL1,E2L3,E2FE	311	0.297059	-1.24399
CCA0779S0067	darkred	TF	MYB30	311	0.460203	-1.35375
CCA0851S0010	darkturquoise	TF	BZIP9,BZO2H2	311	3.02483	-0.806077
CCA1285S0019	darkturquoise	TF	ABS5,T5L1	311	1.79821	-0.181285
CCA0516S0024	darkred	TF		310	0.150184	-1.18588
CCA0546S0128	darkturquoise	TF		310	1.6164	-0.173477
CCA0605S0016	darkred	TF		310	0.152341	-1.30277
CCA0852S0029	darkred	TF	SPL6	310	0.241804	-0.8523
CCA1029S0035	darkturquoise	TF		310	4.33487	-1.28249
CCA0520S0245	darkturquoise	TF	MYB88	309	3.05077	-1.19293
CCA0524S0194	darkturquoise	TF	LBD13	309	1.72452	0.24032
CCA0525S0079	darkturquoise	TF	MYBR1,MYB44	309	1.28888	-0.0856628
CCA0670S0116	darkturquoise	TF	MYB73	309	1.77384	-0.370101
CCA0779S0078	darkred	TF	PRE5	309	0.00766203	-1.69106
CCA0507S0228	darkred	TF		308	-0.153741	-0.959742
CCA0546S0082	darkred	TF	GRF9	308	-0.166423	-0.946346
CCA0816S0086	darkred	TF	HB22,MEE68,ZHD2	308	0.488872	-1.72524
CCA0542S0128	darkred	TF		307	0.166219	-2.1789
CCA0549S0140	darkturquoise	TF	HB-1,HD-ZIP-1,HAT5	307	1.1721	-0.435797
CCA0632S0174	darkred	TF	MYB17	307	0.125681	-0.698601
CCA0998S0021	darkred	TF	GRF8	307	-0.121054	-1.24669
CCA0524S0137	darkred	TF		306	-0.0869393	-1.86039
CCA0899S0094	darkturquoise	TF	JAZ3,JAI3,TIFY6B	306	0.563741	-1.70946
CCA1606S0012	darkturquoise	TF	KNAT1,BP1	304	2.10773	-0.803657
CCA0526S0212	darkturquoise	TF	NAC036	303	5.97297	-3.93586
CCA0747S0027	darkred	TF	LRP1	303	0.130438	-0.660481
CCA0799S0085	darkturquoise	TF	LRP1	303	1.41417	-0.800166
CCA1785S0003	darkred	TF	HB-2,HAT4	303	0.204657	-0.84539
CCA0500S0067	darkturquoise	TF	HSFA6B	302	2.18091	-2.14628
CCA0587S0194	darkturquoise	TF	SOM	301	0.756089	-3.83758
CCA1301S0009	darkturquoise	TF	JKD	301	1.58754	-0.557438
CCA1565S0011	darkred	TF	HSF4,HSFB1	300	1.76084	0.127886
CCA0555S0258	darkturquoise	TF	OBP1	299	1.86282	-0.651907
CCA0526S0084	firebrick4	TF	BBX12	298	0.4267	-1.99187
CCA1550S0010	darkturquoise	TF	MYB73	298	1.73544	-1.02444
CCA1568S0018	darkred	TF	DOF2.1	298	0.305966	-0.688398
CCA0632S0018	darkred	TF	KHZ1	297	0.365755	-0.907718
CCA0698S0142	darkred	TF	RAP2.7	297	-0.159521	-1.0148
CCA0848S0111	darkred	TF	AIL1	297	-0.150377	-1.20175
CCA1542S0004	darkturquoise	TF	WRKY50	297	3.74471	-1.92638
CCA0533S0206	darkred	TF	GRF1	296	-0.207916	-0.914096
CCA0674S0008	darkred	TF	AIL5,CHO1,EMK	296	0.273543	-1.39096
CCA0813S0058	darkred	TF	SHR,SGR7	296	0.494539	-1.05552
CCA0857S0055	darkred	TF	MYB4	296	-0.441049	-1.36771
CCA1656S0001	darkturquoise	TF	MYB88	296	1.87793	-1.10024
CCA0539S0153	darkred	TF	WOX9,STIP	295	-1.47474	-3.05811
CCA0559S0099	darkturquoise	TF	CRF4	295	0.67999	-2.04513
CCA0595S0085	firebrick4	TF	MYB26	295	0.486684	-2.71541
CCA0597S0118	darkred	TF	MYB5	295	-1.33884	-2.1072
CCA1132S0044	darkred	TF		294	-0.832176	-2.08587
CCA0605S0038	darkred	TF	EPR1,RVE7	293	-0.734373	-2.05626
CCA0799S0159	darkred	TF	WRKY70	291	0.216341	-0.992286
CCA1363S0054	darkturquoise	TF	DKML,bZIP29	291	3.1466	-2.25221
CCA0696S0095	firebrick4	TF	UNE12	290	0.692872	-1.00033
CCA0958S0023	darkred	TF	SCAP1	290	0.304474	-2.24558
CCA1034S0013	darkred	TF	EPR1,RVE7	290	0.0652213	-0.726163
CCA0546S0062	darkred	TF	TCP9	289	-0.134703	-1.66744
CCA1024S0005	darkred	TF		289	-0.0461409	-0.88419
CCA1063S0055	darkred	TF	HAP5C,NF-YC9	289	-0.036699	-0.943004
CCA1132S0027	darkred	TF	WER,MYB66	289	0.258611	-1.3072
CCA0587S0059	darkred	TF	LHW	288	0.477631	-1.53339
CCA0748S0066	darkred	TF		288	0.503564	-0.755843
CCA0836S0025	darkred	TF	EDA31	288	0.541243	-1.17383
CCA0701S0046	darkturquoise	TF	SPL14,FBR6	287	0.645507	0.174643
CCA1644S0019	darkred	TF	WOX9,STIP	287	-0.212872	-2.31633
CCA1079S0062	darkred	TF	GATA9	285	0.911767	-1.36007
CCA0782S0054	darkred	TF	HSFB2B	284	-0.256906	-2.12417
CCA1123S0073	darkturquoise	TF	HAP5C,NF-YC9	284	0.277262	-1.05585
CCA0958S0001	darkturquoise	TF	AIL6	283	1.58588	-0.666147
CCA1197S0003	firebrick4	TF	LSN,PNY,HB-6,BLR,RPL,BLH9,VAN	283	1.07764	-0.721234
CCA0957S0008	darkred	TF	TCP5	281	0.609191	-0.862428
CCA1147S0034	darkturquoise	TF	KAN1	281	1.24753	-0.431472
CCA1228S0027	darkred	TF	HSFA2	280	-1.13859	-2.50821
CCA1704S0022	darkturquoise	TF	ERF1	280	0.588878	-3.81178
CCA0525S0032	darkred	TF	SHR,SGR7	278	0.881903	-1.3807
CCA0583S0082	darkred	TF	HEC2	278	0.470511	-1.96859
CCA0754S0020	darkturquoise	TF	DOF1	278	0.920041	-2.30133
CCA0953S0024	firebrick4	TF	HAP2C,NF-YA3	277	1.1881	-0.421383
CCA1126S0087	darkred	TF	CDF2	277	1.38418	-3.94603
CCA0505S0039	darkred	TF	HB21,ZFHD4,ZHD3	276	0.438479	-1.74189
CCA0601S0031	darkred	TF	PHL2	276	0.176464	-0.801416
CCA0836S0024	darkred	TF	PTL	276	-0.0279847	-1.43733
CCA0888S0047	darkred	TF	ATH1	275	0.785355	-0.99976
CCA1593S0020	darkred	TF	GL2	275	0.592145	-1.45636
CCA0597S0113	darkred	TF	MYB5	274	-0.63535	-2.4917
CCA0597S0117	darkred	TF	MYB23,MYBRTF	274	0.0562942	-4.28139
CCA0638S0185	darkturquoise	TF	MYB4	274	1.41659	-1.12232
CCA0854S0075	darkred	TF	HB51,LMI1	274	0.0316322	-0.695664
CCA0747S0005	firebrick4	TF	SCL3	273	0.945605	-0.380812
CCA1217S0054	darkred	TF	STOP1	273	1.01974	-0.706983
CCA1236S0003	darkred	TF	WOX1	271	1.72601	-2.17995
CCA0799S0118	firebrick4	TF	OFP4	270	1.62354	-0.634351
CCA1082S0051	firebrick4	TF	BZO2H3	270	0.648919	-1.29882
CCA1161S0009	darkred	TF	MYB4	270	0.607171	-1.15389
CCA0881S0084	darkturquoise	TF	GTL1	269	0.818396	0.0629162
CCA1638S0025	darkred	TF	VRN1	269	-0.109709	-1.21923
CCA1105S0008	darkred	TF	MYB23,MYBRTF	268	0.391253	-4.4507
CCA1343S0032	darkred	TF	STM,BUM1,SHL,WAM1	268	0.0502608	-1.36214
CCA1370S0023	darkred	TF	TTG2,WRKY44,DSL1	268	0.481376	-1.50789
CCA0638S0121	darkred	TF	MYB82	267	0.601825	-1.5877
CCA1008S0020	darkred	TF	HSFA7B	267	-0.0192315	-2.93912
CCA1111S0034	darkturquoise	TF	MYB55	265	0.689502	-1.6594
CCA0716S0050	darkred	TF	ATPHAN,AS1,MYB91	264	0.0836558	-0.938571
CCA0754S0095	darkred	TF	WER,MYB66	264	0.644561	-2.03895
CCA0854S0106	darkred	TF	GRF4	264	0.946103	-1.1793
CCA1251S0034	darkred	TF	OFP7	264	1.01574	-1.89758
CCA0659S0116	darkred	TF	RL6,RSM3	263	0.592714	-1.26872
CCA0662S0004	darkred	TF	bHLH96	263	2.18797	-2.29331
CCA1008S0021	darkred	TF	HSFA6B	263	-1.85174	-4.21125
CCA0998S0027	firebrick4	TF	MYC4	261	2.21477	-0.530446
CCA0533S0210	darkred	TF	CIB4	260	1.21453	-1.12197
CCA0799S0147	firebrick4	TF	HSL1,HSI2-L1,VAL2	256	1.06752	-0.168868
CCA1531S0017	darkred	TF	VND7	256	1.36439	-0.521116
CCA0566S0159	darkred	TF	ML1	254	0.475867	-2.13378
CCA0587S0214	darkturquoise	TF	GLK1,GPRI1	254	1.09627	-0.288522
CCA0589S0096	darkred	TF	AGL6	254	1.22048	-0.252267
CCA0887S0102	darkturquoise	TF	RVE1	254	0.832874	-2.63698
CCA1046S0047	darkred	TF	bHLH96	252	0.269198	-1.64697
CCA1790S0007	darkred	TF	STO	252	0.391229	-0.770792
CCA0578S0050	darkred	TF	CIB3	251	1.53242	-0.585557
CCA0748S0009	darkturquoise	TF	MYB4	251	1.42705	-1.39054
CCA1500S0020	darkred	TF	MYB7,ATY49	251	0.867903	-2.32302
CCA0403S0002	darkred	TF	AFO,FIL,YAB1	250	0.303833	-1.38597
CCA1589S0008	firebrick4	TF	MBD8	250	0.626892	-0.31043
CCA1027S0035	darkred	TF	bZIP44	246	0.842378	-1.73113
CCA0903S0022	darkred	TF	GRF7	245	0.297196	-0.821919
CCA0507S0139	firebrick4	TF	CDM1,C3H15	244	0.719458	-0.572702
CCA0539S0226	darkred	TF	HSFB2A	244	1.70685	-0.253703
CCA0598S0030	darkturquoise	TF	TBP2	244	0.973863	-0.160027
CCA0829S0064	firebrick4	TF		244	4.08014	-1.14451
CCA0907S0022	darkred	TF	ATAF1,NAC002	244	1.43058	-0.658903
CCA1147S0042	darkred	TF	BPC2,BBR	242	0.510827	-1.33665
CCA0524S0344	firebrick4	TF	PCL1	241	1.03967	-0.338219
CCA0733S0118	firebrick4	TF	KAN4,ATS	241	0.578638	-0.431978
CCA0505S0031	darkred	TF	AL6	240	0.284228	-0.821288
CCA0505S0313	firebrick4	TF	Rap2.6L	240	1.18884	-0.797287
CCA1161S0008	darkred	TF	MYB3	240	1.18142	-2.69075
CCA1505S0012	darkred	TF	ZML1,GATA24	240	0.204464	-0.578268
CCA0954S0043	darkred	TF	GRF3	238	1.04758	-1.17911
CCA0679S0129	darkred	TF	SRS5	237	0.430089	-1.05434
CCA1219S0076	firebrick4	TF	DF1	237	0.704283	-0.510172
CCA1737S0011	darkred	TF	GRF5	236	0.356641	-1.15231
CCA0652S0031	darkred	TF	bHLH093	235	0.932857	-1.8917
CCA0652S0030	darkred	TF	bHLH093	234	1.04916	-2.03553
CCA0944S0027	firebrick4	TF	SCL1	234	0.852725	-0.0600193
CCA1079S0055	darkred	TF	TINY2	234	1.79801	-1.10148
CCA0680S0056	firebrick4	TF		232	1.59431	-1.17703
CCA0947S0023	firebrick4	TF	bZIP44	231	0.908724	-3.69667
CCA1073S0034	brown2	TF	OZF2,TZF3,C3H49	230	0.951653	-1.24135
CCA1568S0003	firebrick4	TF	RAP2.7	230	1.09113	-1.33287
CCA0589S0078	firebrick4	TF	ADAP	229	0.575404	-0.893389
CCA1279S0028	firebrick4	TF		229	0.95694	-0.73258
CCA1606S0011	firebrick4	TF	HAT22	229	1.53036	-1.05076
CCA0587S0079	firebrick4	TF	NLP7	228	1.11862	-0.915844
CCA1281S0020	firebrick4	TF	WRKY14	228	0.699292	-0.537754
CCA1309S0008	darkred	TF	MYB16,MIXTA	228	0.604641	-1.93512
CCA0816S0089	firebrick4	TF	MYB3	227	2.05697	-1.14876
CCA1327S0028	firebrick4	TF	HSFA5	227	0.899584	-1.34113
CCA0737S0040	firebrick4	TF	CAMTA3,SR1	226	1.46224	-1.53022
CCA0813S0088	firebrick4	TF	bZIP6	226	0.835224	-2.08315
CCA0816S0072	firebrick4	TF	WRKY3	226	0.953736	-1.05098
CCA0869S0038	firebrick4	TF	AKS2	226	1.73891	-1.57136
CCA1134S0022	darkred	TF	GT2L	226	1.09539	-2.0433
CCA0566S0048	firebrick4	TF		225	0.898933	-0.615835
CCA0709S0011	firebrick4	TF	BHLH038,ORG2	225	2.37935	-4.78684
CCA0905S0016	firebrick4	TF	HSI2,VAL1	225	1.12384	-1.23616
CCA0909S0004	firebrick4	TF	MNP,HAN,GATA18	225	2.34639	-2.01183
CCA0953S0094	firebrick4	TF	bHLH093	225	3.40929	-4.49863
CCA1039S0052	firebrick4	TF	IDD2	225	1.55972	-0.602708
CCA1105S0002	darkred	TF	ERF34	225	1.05127	-2.1332
CCA1686S0030	firebrick4	TF	BLH3	225	0.75442	-0.862048
CCA0555S0036	firebrick4	TF		224	1.69973	-1.83141
CCA0634S0025	firebrick4	TF	NAC100	224	1.7597	-2.14122
CCA0704S0070	firebrick4	TF	RAX3,MYB84	224	2.54768	-2.34292
CCA0729S0022	firebrick4	TF	HSL1,HSI2-L1,VAL2	224	0.641341	-0.731975
CCA0791S0008	firebrick4	TF	MYB50	224	1.51348	-1.46001
CCA0884S0140	darkred	TF	HAT3	224	0.968502	-0.901635
CCA0984S0066	firebrick4	TF	MYB62,BW62B	224	1.24835	-1.45068
CCA1126S0035	firebrick4	TF	SPL13A	224	0.792342	-1.54188
CCA1300S0004	firebrick4	TF	RAV1,EDF4	224	3.77244	-3.44274
CCA1603S0008	firebrick4	TF	MYB102,ATM4	224	1.37506	-1.47144
CCA0533S0072	firebrick4	TF	VND4,EMB2749	223	0.687648	-1.4977
CCA0681S0034	firebrick4	TF	MYBD	223	1.10259	-2.42099
CCA0918S0119	darkred	TF	LHW	223	0.981867	-1.22643
CCA0942S0079	firebrick4	TF	LBD41	223	2.73038	-1.29035
CCA1046S0058	firebrick4	TF	MYC2,RD22BP1,JAI1,JIN1,ZBF1	223	1.375	-1.78364
CCA1094S0019	firebrick4	TF	MYB21	223	3.50649	-2.78263
CCA1251S0045	firebrick4	TF	GBF1	223	1.74745	-1.77163
CCA1559S0023	darkturquoise	TF		223	0.76639	-1.07622
CCA0676S0067	firebrick4	TF		222	1.19129	-2.9591
CCA0698S0147	darkred	TF	COL4	222	0.832729	-1.39121
CCA0757S0061	firebrick4	TF	ERF1	222	2.48387	-4.31084
CCA0984S0067	firebrick4	TF	BEE3	222	3.15087	-5.22586
CCA0524S0169	firebrick4	TF	HSI2,VAL1	221	2.04509	-1.28564
CCA0555S0164	darkred	TF	NF-YA10	221	0.695715	0.112544
CCA0691S0040	firebrick4	TF	CAMTA5	221	0.805688	-1.04326
CCA0779S0016	firebrick4	TF	MYB3	221	1.8031	-2.9297
CCA0834S0007	firebrick4	TF		221	1.31447	-1.39266
CCA0922S0014	firebrick4	TF	BEE3	221	1.31212	-4.57464
CCA1002S0017	firebrick4	TF	OBP3	221	1.10547	-0.860092
CCA1057S0016	darkred	TF	WRKY23	221	2.75709	-0.237201
CCA1126S0036	firebrick4	TF	WRKY75	221	2.61867	-4.11335
CCA1126S0068	firebrick4	TF	LBD41	221	1.95166	-1.01501
CCA1128S0012	darkred	TF	NAIP1	221	0.83515	-0.0308778
CCA1672S0017	firebrick4	TF	HB-7	221	1.96754	-1.35094
CCA0526S0285	firebrick4	TF	WRKY35,MEE24	220	1.27786	-2.22276
CCA0555S0023	darkred	TF	GRF3	220	0.500862	-1.13521
CCA0620S0015	firebrick4	TF	HSFA4A	220	1.51603	-1.25979
CCA0520S0272	darkred	TF	HB30,ZFHD3,ZHD8	219	0.271671	-1.19416
CCA0800S0059	firebrick4	TF		219	0.921377	-1.05342
CCA0884S0100	firebrick4	TF	SPL8	219	1.91695	-1.65681
CCA1151S0075	firebrick4	TF	HRA1	219	4.19575	-2.54085
CCA1348S0004	firebrick4	TF		219	1.97872	-1.77718
CCA1364S0001	firebrick4	TF	FUL	219	1.16055	-1.045
CCA0704S0136	firebrick4	TF	ATAF1,NAC002	218	3.21016	-2.95675
CCA0524S0192	firebrick4	TF	CYP82C4	217	2.12999	-0.43041
CCA0526S0105	firebrick4	TF	ASR3	217	1.59867	-1.12775
CCA0698S0204	firebrick4	TF	ESE3	217	4.1411	-2.7944
CCA0762S0050	firebrick4	TF	MYB62,BW62B	217	3.14653	-1.43521
CCA0862S0097	firebrick4	TF	HAP2A,NF-YA1	217	1.42154	-1.10132
CCA1147S0044	firebrick4	TF	SGR5,IDD15	217	1.43812	-0.93539
CCA1279S0026	firebrick4	TF	bZIP44	217	2.36226	-2.36953
CCA1737S0005	darkred	TF	NAC103	217	1.25711	-0.083861
CCA0500S0221	darkred	TF	GAMMAMYB2	216	3.27919	-0.567095
CCA0505S0351	firebrick4	TF	BBX13	216	1.25864	-0.911865
CCA0605S0061	darkred	TF	HB22,MEE68,ZHD2	216	0.684967	-1.38183
CCA0659S0117	firebrick4	TF	CIB1	216	2.06332	-1.83147
CCA0829S0087	firebrick4	TF		216	2.10574	-3.55098
CCA0704S0069	firebrick4	TF	OZF2,TZF3,C3H49	215	1.73802	-3.57344
CCA0829S0093	firebrick4	TF	VIP1,SUE3	215	1.00163	-0.476591
CCA0779S0018	firebrick4	TF	TFIIIA	214	1.12904	-1.36854
CCA1046S0052	firebrick4	TF		214	1.2318	-1.8734
CCA1095S0054	firebrick4	TF	NLP4	214	1.31722	-0.575287
CCA1322S0016	firebrick4	TF	DEAR2	214	1.24542	-1.32876
CCA1591S0029	firebrick4	TF	MYB3	214	2.09128	-2.80818
CCA0555S0152	darkred	TF	BLH1	213	1.16684	0.00406359
CCA0839S0061	darkred	TF	FD,bzip14	213	1.00862	-0.0216381
CCA0986S0050	firebrick4	TF	TCP8	213	1.21348	-1.50842
CCA1620S0031	firebrick4	TF	bZIP44	213	1.17062	-2.52968
CCA0507S0112	firebrick4	TF	SPL6	212	1.4065	-1.8444
CCA0524S0177	firebrick4	TF	TRFL5	212	0.755819	-0.287238
CCA0701S0051	firebrick4	TF		212	1.48441	-1.10895
CCA1233S0024	darkred	TF		212	0.395893	-2.1476
CCA0583S0085	darkred	TF	HSFB4,SCZ	211	0.674118	-0.977404
CCA0942S0098	firebrick4	TF		211	1.08315	-1.34461
CCA1545S0018	firebrick4	TF	OBP4	211	1.34004	-1.25834
CCA1601S0016	firebrick4	TF	ATAF1,NAC002	211	1.66296	-1.35716
CCA0762S0031	firebrick4	TF		210	1.34605	-3.29974
CCA0991S0010	firebrick4	TF	NAC014	210	1.05683	-0.825447
CCA1063S0043	firebrick4	TF	bHLH96	210	3.09767	-1.60657
CCA1279S0043	firebrick4	TF	CIB1	210	1.67439	-1.16466
CCA0881S0024	darkred	TF	BPC7,BBR	209	0.594674	-1.15305
CCA1379S0005	firebrick4	TF	GATA5	209	2.16949	-1.42612
CCA1505S0020	darkred	TF	SVP	209	0.504869	-1.33047
CCA1599S0012	firebrick4	TF	HB6	209	0.780228	-1.09954
CCA1041S0028	firebrick4	TF		208	2.27072	-2.17082
CCA1769S0006	firebrick4	TF	TLP3	208	1.62675	-1.16848
CCA0852S0080	firebrick4	TF	WRKY57	207	1.22164	-0.341963
CCA0961S0106	darkturquoise	TF	TCP4	207	1.92877	-1.44636
CCA0883S0007	firebrick4	TF	ZFHD1,ZHD11	206	0.9643	-1.73972
CCA0507S0259	darkred	TF	VRN1	205	0.479512	-0.928091
CCA0754S0092	darkred	TF	TT2,MYB123	204	1.73701	-2.9921
CCA1236S0030	darkred	TF	MYB6	203	0.8573	-1.79047
CCA0568S0053	firebrick4	TF	MYB15,ATY19	202	3.11466	-3.71931
CCA0961S0035	firebrick4	TF	NAC2,NARS1	202	2.06613	-0.127676
CCA0613S0044	darkred	TF		201	1.24432	-0.0301182
CCA0595S0110	darkred	TF	SHN1,WIN1	200	0.49124	-0.946087
CCA0816S0115	firebrick4	TF	SEP1/SEP2	200	1.22319	-0.937845
CCA0954S0030	firebrick4	TF		200	2.10779	-0.515842
CCA1548S0005	firebrick4	TF	FRS2	200	1.87614	-0.595354
CCA0589S0115	firebrick4	TF	GRF2	199	2.06554	-2.19509
CCA1041S0061	darkred	TF	GL2	199	1.42607	-1.49223
CCA0800S0050	darkred	TF		198	1.27332	-0.206436
CCA1251S0016	firebrick4	TF		198	1.39737	-1.78171
CCA0513S0141	firebrick4	TF	SPL6	197	2.65215	-1.89321
CCA0749S0016	firebrick4	TF	TRFL8	196	1.08471	-1.5757
CCA0770S0017	firebrick4	TF		196	1.11479	-1.27835
CCA0819S0013	firebrick4	TF	ERF34	195	0.811035	-1.8879
CCA0848S0108	darkred	TF	TT2,MYB123	194	0.258613	-1.01833
CCA0680S0050	darkred	TF	LBD21	193	0.937081	-1.20649
CCA0854S0077	firebrick4	TF	HRA1	193	3.1926	-1.62752
CCA0659S0163	firebrick4	TF	BLH6	192	1.37788	-0.236202
CCA0765S0109	firebrick4	TF	MYB60	192	0.951469	-2.2123
CCA0986S0056	firebrick4	TF	ZRF1a,GIsA1	192	1.28465	-0.594366
CCA0674S0056	firebrick4	TF		190	1.23667	-0.79078
CCA0678S0070	darkred	TF	TEM1,EDF1	190	3.81244	-0.525223
CCA0633S0099	firebrick4	TF	PIL1	189	1.25663	-1.95021
CCA0680S0029	firebrick4	TF	HAT22	189	1.94598	-2.03831
CCA0961S0036	darkred	TF	RD26	188	1.03658	-0.214381
CCA0576S0098	darkred	TF	RD26	187	1.78503	-0.210659
CCA1394S0028	darkred	TF	TCP4	187	0.346151	-1.10578
CCA0001S0011	firebrick4	TF	CAMTA3,SR1	186	0.809199	-0.056784
CCA0623S0100	darkred	TF	BEL1	186	0.733623	-1.4799
CCA1357S0011	firebrick4	TF	DIV2	186	1.21191	-3.22111
CCA0573S0187	firebrick4	TF	bHLH121	185	1.32546	-1.04435
CCA0782S0144	darkred	TF	BEL1	185	1.65622	-2.88896
CCA0876S0071	firebrick4	TF	LBD38	183	0.952157	-1.06139
CCA1033S0055	darkred	TF		183	0.416677	-0.926223
CCA0646S0062	firebrick4	TF	TRFL10	180	1.11597	-1.12141
CCA0583S0110	firebrick4	TF	RAP2.1	177	1.52625	-1.6464
CCA0981S0073	firebrick4	TF		175	1.09442	-0.516218
CCA1788S0002	darkred	TF	WER,MYB66	175	1.63853	-2.24669
CCA0565S0088	firebrick4	TF		174	1.40396	-1.17807
CCA0598S0127	darkred	TF	OFP8	174	0.413399	-1.52644
CCA0836S0085	firebrick4	TF	SPL3	174	1.80725	-1.44772
CCA0546S0156	firebrick4	TF	GATA11	172	1.01123	-1.55358
CCA0573S0003	firebrick4	TF	MYB56	167	1.15548	-1.58275
CCA0708S0105	firebrick4	TF	CRF4	166	2.69677	-2.61449
CCA0816S0015	firebrick4	TF	MYB30	166	1.45167	-1.6688
CCA0904S0146	darkred	TF	OCP3	166	0.597336	-0.90458
CCA0616S0155	firebrick4	TF	SACL3	164	1.19434	-0.299795
CCA1151S0012	darkred	TF	AG	163	0.79864	-1.55827
CCA1027S0057	darkred	TF	SHI	160	0.954542	-1.28596
CCA0634S0040	brown2	TF	CDF3	159	0.786571	-1.81842
CCA0828S0075	firebrick4	TF	DOF1	158	0.915368	-1.37159
CCA0862S0121	darkred	TF		157	0.456989	-0.792311
CCA0525S0210	darkturquoise	TF		156	1.16887	-0.518802
CCA0659S0143	darkred	TF	bZIP44	154	0.444245	-0.765664
CCA0884S0023	firebrick4	TF		152	1.40745	-4.22153
CCA1094S0050	firebrick4	TF	HB-1,HD-ZIP-1,HAT5	151	1.91531	-0.66277
CCA0678S0128	firebrick4	TF		150	3.5796	-2.97722
CCA0877S0015	firebrick4	TF	HYH	148	1.06066	-1.40766
CCA0524S0201	darkred	TF	WRKY33	146	1.97652	-0.917713
CCA0708S0067	firebrick4	TF	bHLH093	138	1.60415	-0.78824
CCA1738S0039	darkturquoise	TF		137	1.02426	-0.325218
CCA0659S0044	firebrick4	TF	VRN1	131	0.798613	-1.45463
CCA0816S0099	darkred	TF	STK	127	1.65493	-5.15249
CCA0526S0032	firebrick4	TF	FRS8	126	0.953695	-1.29438
CCA0941S0068	darkred	TF		124	0.732085	-1.15419
CCA0779S0057	brown2	TF	CDF2	122	0.82532	-1.13384
CCA0936S0059	firebrick4	TF		119	2.54856	-1.28579
CCA0774S0055	brown2	TF	WRKY7	118	0.854788	-1.20615
CCA1519S0014	darkred	TF		118	0.667785	-0.928689
CCA0589S0055	firebrick4	TF	WRKY40	117	1.39961	-1.79674
CCA0705S0044	firebrick4	TF	BBX19	116	0.724438	-1.33979
CCA0852S0007	firebrick4	TF	BIM2	116	1.40886	-0.58564
CCA0642S0073	brown2	TF	COL2	112	1.46287	-2.82694
CCA1525S0002	brown2	TF	GBF3	110	0.799808	-1.34357
CCA0678S0042	firebrick4	TF	MYB6	109	0.685757	-1.035
CCA1742S0021	firebrick4	TF	CAMTA5	109	1.21167	-1.00996
CCA1196S0013	firebrick4	TF	MYB94	106	1.19262	-1.22997
CCA1724S0007	darkturquoise	TF	HSF3,HSFA1B	103	1.54595	-1.32723
CCA0513S0172	firebrick4	TF		102	1.17726	-1.61609
CCA0789S0070	darkred	TF	FHY3	101	0.635073	-0.882007
CCA0559S0066	darkred	TF	ET2	99	0.772969	-0.91763
CCA0642S0016	brown2	TF		99	1.05475	-3.10632
CCA1410S0053	darkred	TF	MYB6	99	0.721067	-0.880442
CCA0816S0035	brown2	TF	CDF2	96	1.21195	-1.58451
CCA0774S0047	brown2	TF	AP2	94	1.28454	-0.774898
CCA0779S0047	firebrick4	TF	MYB16,MIXTA	92	1.50923	-1.80308
CCA0555S0018	brown2	TF	CBF2,DREB1C,FTQ4	90	1.27342	-3.63201
CCA1407S0008	darkturquoise	TF		87	1.78477	-2.12073
CCA1412S0009	firebrick4	TF	GT2L	87	1.11915	-0.659241
CCA0607S0025	brown2	TF	LHY	84	1.54204	-4.23413
CCA1364S0022	brown2	TF	SCL23	84	1.22394	-2.60666
CCA0698S0122	brown2	TF	LCL5,RVE8	81	1.01171	-0.966995
CCA0905S0008	brown2	TF	CRF4	81	2.12971	-0.524897
CCA0941S0072	firebrick4	TF	FRF2	81	1.30859	-1.22099
CCA0718S0001	brown2	TF	CAMTA2	80	1.2645	-1.02772
CCA1524S0079	brown2	TF		80	1.71474	-2.97399
CCA1002S0070	brown2	TF	SCL14,GRAS2	79	0.943154	-1.38873
CCA0525S0185	brown2	TF	BZR1	77	1.10546	-1.26535
CCA1638S0021	brown2	TF	RAP2.4	75	1.68844	-1.47293
CCA0516S0111	brown2	TF		74	1.66877	-3.56683
CCA0546S0157	brown2	TF	ARF16	74	1.78067	-2.68156
CCA0748S0104	brown2	TF	NAC090	74	1.17431	-1.65842
CCA1143S0025	brown2	TF	MYB14	73	1.9661	-1.38079
CCA0918S0095	brown2	TF	bHLH14	71	1.80002	-1.18803
CCA0500S0276	firebrick4	TF		70	1.51898	-1.29378
CCA0646S0036	brown2	TF	NAC062,NTL6	70	1.02353	-1.32238
CCA1273S0013	brown2	TF	BHLH92	69	2.51225	-3.87283
CCA1194S0022	brown2	TF		68	1.7546	-1.2913
CCA0546S0019	brown2	TF	ERF5	67	2.54505	-2.07356
CCA0546S0017	brown2	TF	ERF5	65	2.42065	-2.03245
CCA1397S0021	brown2	TF	ERF53	65	3.04831	-2.63873
CCA0582S0064	brown2	TF	TZF9	63	1.43855	-1.58322
CCA1498S0043	firebrick4	TF	AGL15	63	2.48511	-2.05496
CCA0516S0063	brown2	TF		62	1.37831	-0.523354
CCA0698S0183	brown2	TF	WRKY18	62	1.65837	-0.747974
CCA0762S0026	brown2	TF	RAP2.4	62	1.6917	-2.59301
CCA1017S0028	brown2	TF		62	2.69261	-4.7079
CCA0514S0007	brown2	TF	WRKY6	60	2.59888	-3.63373
CCA0679S0108	brown2	TF	DKML,bZIP29	60	1.63773	-1.10644
CCA0862S0032	brown2	TF	HAT14	60	1.43375	-0.821978
CCA0954S0009	brown2	TF	HSF3,HSFA1B	59	1.31338	-0.502373
CCA1250S0059	brown2	TF	NAC083,VNI2	59	2.28964	-2.69473
CCA1289S0001	brown2	TF	MYB15,ATY19	59	2.64284	-1.40305
CCA0982S0067	brown2	TF	bHLH14	58	1.47766	-1.50157
CCA0576S0128	brown2	TF	ERF4,RAP2.5	50	1.95944	-1.62535
CCA0874S0068	brown2	TF	WRKY22	49	2.09003	-1.66132
CCA0828S0017	darkturquoise	TF / SA_related	PAN,TGA8 / AHBP-1B	436	0.657847	-0.0204925
CCA1194S0004	darkturquoise	TF / SA_related	TGA9	320	3.97542	-0.563748
CCA1075S0067	darkturquoise	TF / SA_related	TGA9	308	2.05482	-0.360613
CCA0762S0002	firebrick4	TF / SA_related	TGA7	221	1.34654	-1.03215
CCA0747S0058	darkred	ROS_related	GSTU18	410	-0.0664359	-0.82164
CCA1027S0041	darkturquoise	ROS_related	PRX37	385	0.709702	0.593713
CCA0923S0074	darkturquoise	ROS_related	GSTF8	375	1.51589	0.225056
CCA0505S0269	darkturquoise	ROS_related	RBOHD	372	2.62702	-0.252306
CCA0676S0023	darkturquoise	ROS_related	PRX37	370	1.70213	0.922381
CCA0905S0040	darkturquoise	ROS_related	PRX52	370	1.13771	0.397473
CCA1204S0017	darkturquoise	ROS_related	CAT4	366	1.27271	-0.132718
CCA0918S0217	darkturquoise	ROS_related	RBOH F	360	2.79891	-1.22423
CCA0899S0008	darkturquoise	ROS_related	CAT8	351	0.793934	0.310641
CCA0765S0057	darkred	ROS_related	GSTF8	349	-0.504111	-1.55668
CCA0977S0062	darkturquoise	ROS_related	PRXQ	346	0.241901	-2.17217
CCA0688S0074	darkturquoise	ROS_related	PRXCB	345	2.22647	0.0658946
CCA0977S0063	darkturquoise	ROS_related	RBOH F	345	1.32371	-0.348723
CCA1713S0003	darkturquoise	ROS_related	PRXCB	342	2.59449	0.0107527
CCA1089S0011	darkturquoise	ROS_related	PRXCB	341	2.51539	0.0651284
CCA1370S0017	darkturquoise	ROS_related	GSTL3	339	0.346342	-1.10536
CCA1204S0021	darkturquoise	ROS_related	CAT4	337	0.875138	0.0856681
CCA0652S0055	darkturquoise	ROS_related	PRX37	331	5.13881	1.01546
CCA0676S0021	darkturquoise	ROS_related	PRX52	330	4.28629	-0.77613
CCA0799S0104	darkturquoise	ROS_related	PRX52	328	4.6052	-1.01472
CCA0688S0071	darkturquoise	ROS_related	PRXCB	327	2.69861	-0.38683
CCA0535S0030	darkred	ROS_related	GSTF8	311	-0.481356	-1.20888
CCA0535S0031	darkred	ROS_related	GSTF8	311	-0.481356	-1.20888
CCA0524S0195	darkturquoise	ROS_related	PRX52	309	1.64999	-0.4125
CCA1394S0006	darkturquoise	ROS_related	GRXS13	309	2.74234	-0.519316
CCA1394S0007	darkturquoise	ROS_related	GRXS13	309	2.74234	-0.519316
CCA1015S0094	darkred	ROS_related	GSTL2	282	0.567263	-1.80922
CCA1721S0011	firebrick4	ROS_related	RBOH F	245	2.40664	-1.59482
CCA0654S0059	firebrick4	ROS_related	CAT5	229	1.62851	-1.62981
CCA0539S0169	firebrick4	ROS_related	GRXS13	228	1.99518	-1.27231
CCA0698S0169	firebrick4	ROS_related	GPX1	218	1.4937	-1.60035
CCA0828S0078	firebrick4	ROS_related	GSTU25	217	1.32711	-1.1476
CCA1370S0018	firebrick4	ROS_related	GSTL3	214	0.778006	-1.45972
CCA0828S0083	firebrick4	ROS_related	GSTU24	212	1.33772	-3.35163
CCA0698S0099	firebrick4	ROS_related	GSTL3	209	1.66698	-1.17578
CCA0634S0061	darkred	ROS_related	GSTU9	202	0.888466	-0.110841
CCA0688S0052	darkred	ROS_related	PRXR1	200	0.287093	-1.15593
CCA0698S0098	firebrick4	ROS_related	GSTL3	192	1.88209	-0.476479
CCA1633S0011	firebrick4	ROS_related	GSTZ1	177	1.80547	-0.793475
CCA0502S0054	firebrick4	ROS_related	GPX3	168	2.18394	-0.34011
CCA0905S0122	firebrick4	ROS_related	GRX4	152	0.507246	-1.26219
CCA1357S0012	brown2	ROS_related	CAT7	81	1.79381	-2.68906
CCA0616S0040	brown2	ROS_related	CAT8	80	1.17316	-1.74729
CCA0266S0001	brown2	ROS_related	RBOHD	71	2.04479	-0.94538
CCA0526S0140	brown2	ROS_related	RBOHD	62	2.08023	-1.03085
CCA0526S0088	darkturquoise	TF / JA_related	JAZ10,TIFY9,JAS1	366	1.48968	-0.706274
CCA1458S0014	darkred	TF / JA_related	JAZ3,JAI3,TIFY6B	306	0.214914	-1.62285
CCA0977S0044	darkred	TF / JA_related	JAZ1,TIFY10A	300	1.18898	-0.0905537
CCA0754S0118	darkred	TF / JA_related	JAZ1,TIFY10A	276	1.14579	-0.143765
CCA0605S0088	firebrick4	TF / JA_related	JAZ3,JAI3,TIFY6B	73	1.61075	-0.502508
CCA1407S0040	darkturquoise	TF / IAA_related	ARF2,HSS,ORE14	415	1.06997	-0.218765
CCA0679S0102	darkred	TF / IAA_related	MP,ARF5,IAA24	278	0.284501	-1.09647
CCA0665S0069	darkred	TF / IAA_related	ARF18	207	0.188755	-1.14573
CCA0866S0024	firebrick4	TF / IAA_related	ARF2,HSS,ORE14	158	1.16403	-1.19057
CCA0513S0276	firebrick4	TF / GA_related	RGL2 / RGA1	240	1.56871	-1.91469
CCA1141S0007	firebrick4	TF / GA_related	RGA1	231	0.725978	-2.79813
CCA0686S0020	firebrick4	TF / GA_related	PIL5 / PIF4	229	1.3257	-1.01425
CCA0774S0037	darkred	TF / GA_related	SPT / PIF4	205	0.945395	-0.962813
CCA1326S0017	firebrick4	TF / GA_related	SPT / PIF4	122	1.26625	-1.17792
CCA0929S0076	darkturquoise	TF / ethylene_related	RRTF1 / ERF73	344	5.20034	-2.80009
CCA0546S0007	darkred	TF / ethylene_related	ERF-1	326	1.41124	0.0192979
CCA0539S0186	darkred	TF / ethylene_related	ERF4,RAP2.5	321	2.34428	-0.177481
CCA0010S0001	darkturquoise	TF / ethylene_related	ERF5	319	4.88954	-2.67347
CCA0912S0015	darkred	TF / ethylene_related	ERF1	278	1.89473	0.0937582
CCA1257S0036	firebrick4	TF / ethylene_related	RAP2.3,EBP,ERF72	256	1.32922	-0.642682
CCA1365S0022	darkred	TF / ethylene_related	ERF12	244	0.235417	-1.37805
CCA0539S0187	firebrick4	TF / ethylene_related	ERF12	238	0.820731	-0.423213
CCA0552S0151	firebrick4	TF / ethylene_related	ERF7	231	0.711267	-0.653975
CCA0526S0333	firebrick4	TF / ethylene_related	HRE2 / ERF73	227	1.92375	-1.01382
CCA0510S0116	firebrick4	TF / ethylene_related	ERF1	221	1.03968	-2.08252
CCA0892S0010	firebrick4	TF / ethylene_related	EIL3,SLIM1	216	1.92023	-2.55113
CCA0578S0087	firebrick4	TF / ethylene_related	EIN3	186	1.0053	-0.225951
CCA1573S0039	firebrick4	TF / ethylene_related	EIN3	126	1.1238	-0.924484
CCA0514S0206	brown2	TF / ethylene_related	ERF-1	69	3.06408	-1.80623
CCA1202S0001	brown2	TF / ethylene_related	ERF-1	65	2.6841	-1.55649
CCA0743S0034	darkturquoise	TF / CK_related	ARR11	338	1.19639	-0.0365105
CCA0904S0082	darkturquoise	TF / CK_related	ARR12	304	1.37519	-0.231263
CCA1046S0123	darkred	TF / CK_related	ARR12	238	2.00875	-1.86671
CCA0583S0074	darkturquoise	TF / ABA_related	ABF2,AREB1	308	0.444545	-1.52789
CCA0929S0069	firebrick4	TF / ABA_related	ABF2,AREB1	209	1.91153	-2.76928
